# Supplementary material for: Molecular and Functional Characteristics of Airway Epithelium under Chronic Hypoxia
Source: Int J Mol Sci. 2023 Mar 30;24(7):6475. doi: 10.3390/ijms24076475 (PMC10095024; doi:10.3390/ijms24076475)
Supplement: Supplementary file 1 [file ijms-24-06475-s001.zip]

Archive with 5 entries (5 files):
- Supplementary materials_Wong et al_Submission.pdf
- Table S1_DEPs conditional reprogramming cultures_Wong et al_Submission.xlsx
- Table S2_DEPs air-liquid interface cultures_Wong et al_Submission.xlsx
- Table S3_IPA pathway analysis_Conditional reprogramming cultures_Wong et al_Submission.xlsx
- Table S4_IPA pathway analysis_Air-liquid interface cultures_Wong et al_Submission.xlsx
