# Supplementary material for: Molecular and Functional Characteristics of Airway Epithelium under Chronic Hypoxia
Source: Int J Mol Sci. 2023 Mar 30;24(7):6475. doi: 10.3390/ijms24076475 (PMC10095024; doi:10.3390/ijms24076475)
Supplement: Supplementary file 1 [file ijms-24-06475-s001.zip › Supplementary materials_Wong et al_Submission.pdf]

## **Supplementary materials**

**Title:** Molecular and functional characteristics of airway epithelium under chronic hypoxia.

Sharon L. Wong, Egi Kardia, Abhishek Vijayan, Bala Umashankar, Elvis Pandzic, Ling Zhong, Adam Jaffe and Shafagh A. Waters

**Table S1. List of differentially expressed proteins (DEPs) for hNECs conditional reprogramming cultures. (Excel file)**

**Table S2. List of differentially expressed proteins (DEPs) for hNECs air-liquid interface cultures. (Excel file)**

**Table S3. IPA pathway analysis of differentially expressed proteins for hNECs conditional reprogramming cultures. (Excel file)**

**Table S4. IPA pathway analysis of differentially expressed proteins for hNECs air-liquid interface cultures. (Excel file)**

**Table S5. Details of study participants**

| <b>Participant ID</b> | <b><i>CFTR</i> genotype</b> | <b>Age (yr)</b> | <b>Sex</b> |
|-----------------------|-----------------------------|-----------------|------------|
| WT1                   | WT/WT                       | 2.5             | M          |
| WT2                   | WT/WT                       | 1.4             | Unknown    |
| WT3                   | WT/WT                       | 13.3            | M          |
| CF1                   | F508del/F508del             | 11.2            | M          |
| CF2                   | F508del/F508del             | 5.0             | M          |
| CF3                   | F508del/F508del             | 13.8            | F          |
| CF4                   | F508del/F508del             | 6.4             | F          |
| CF5                   | F508del/F508del             | 14.2            | M          |
| CF6                   | F508del/F508del             | 3.7             | M          |
| CF7                   | F508del/F508del             | 4.8             | F          |
| CF8                   | F508del/F508del             | 4.5             | F          |

**Table S6. Antibodies for immunofluorescence staining**

| <b>Antibody</b>                                                                                | <b>Dilution</b> | <b>Supplier</b>   | <b>Catalogue number</b> |
|------------------------------------------------------------------------------------------------|-----------------|-------------------|-------------------------|
| Rabbit monoclonal anti-E-cadherin (24E10)                                                      | 1:100           | Cell Signalling   | 3195                    |
| Mouse monoclonal anti-MUC5AC (45M1)                                                            | 1:250           | Life Technologies | MA5-12178               |
| Rabbit monoclonal anti-Acetyl- $\alpha$ -Tubulin (Lys40) (D20G3) XP, Alexa Fluor 647 conjugate | 1:50            | Cell Signalling   | 81502                   |
| Goat polyclonal anti-mouse IgG antibody, Alexa Fluor 555                                       | 1:500           | Life Technologies | A-21424                 |
| Goat polyclonal anti-rabbit IgG antibody, Alexa Fluor 488                                      | 1:500           | Life Technologies | A-11034                 |

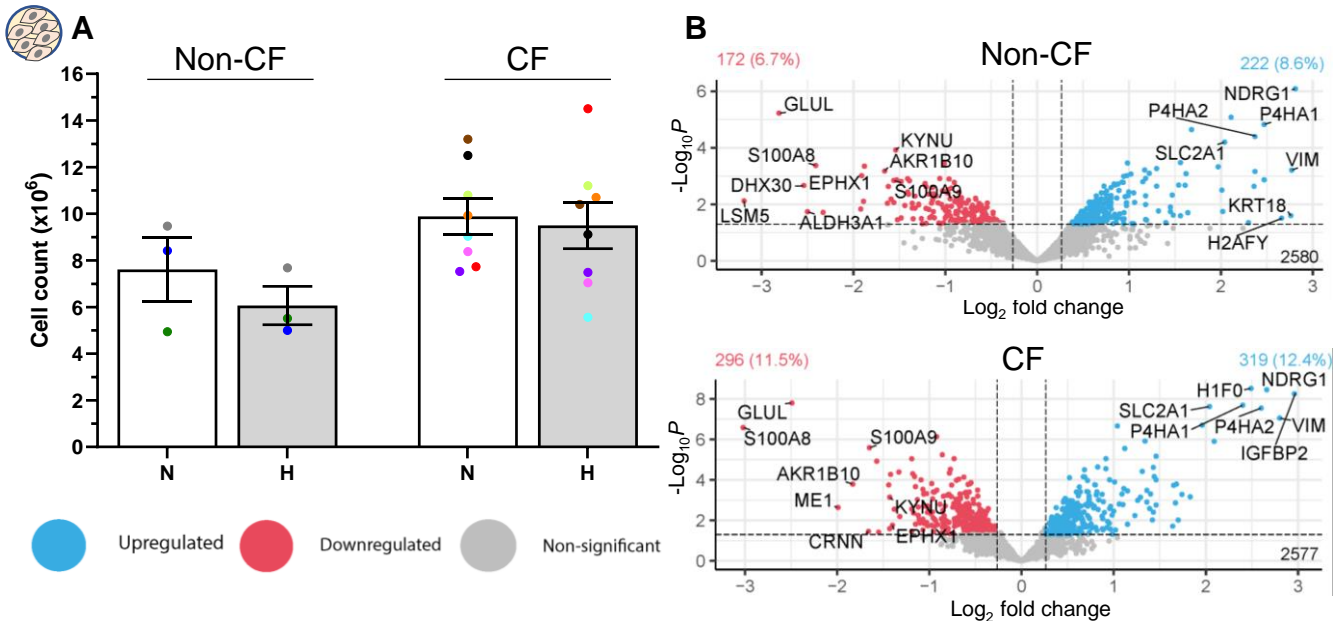

**Figure S1. Effect of chronic hypoxia on the expansion of primary human nasal epithelial cells (hNECs).** (A) Cell count of non-CF ( $n=3$ ) and CF ( $n=8$ ) hNECs following expansion under normoxic and chronic hypoxic conditions. Each coloured circle represents cultures from an individual participant. Data are presented as bar plots with mean  $\pm$  standard error of the mean (SEM). One-way ANOVA was used to determine statistical significance. (B) Volcano plots of differentially expressed proteins (DEPs) in hypoxic cells compared to normoxic cells in non-CF ( $n=3$ ) and CF ( $n=8$ ). Dotted lines indicate significance cut-off ( $p\text{-value} \leq 0.05$ ,  $|\text{fold change}| \geq 1.2$ ). The count of significant upregulated proteins, significant downregulated proteins and total proteins are shown in top right, top left and bottom right respectively. The top 5 to 10 upregulated and downregulated proteins are labelled.

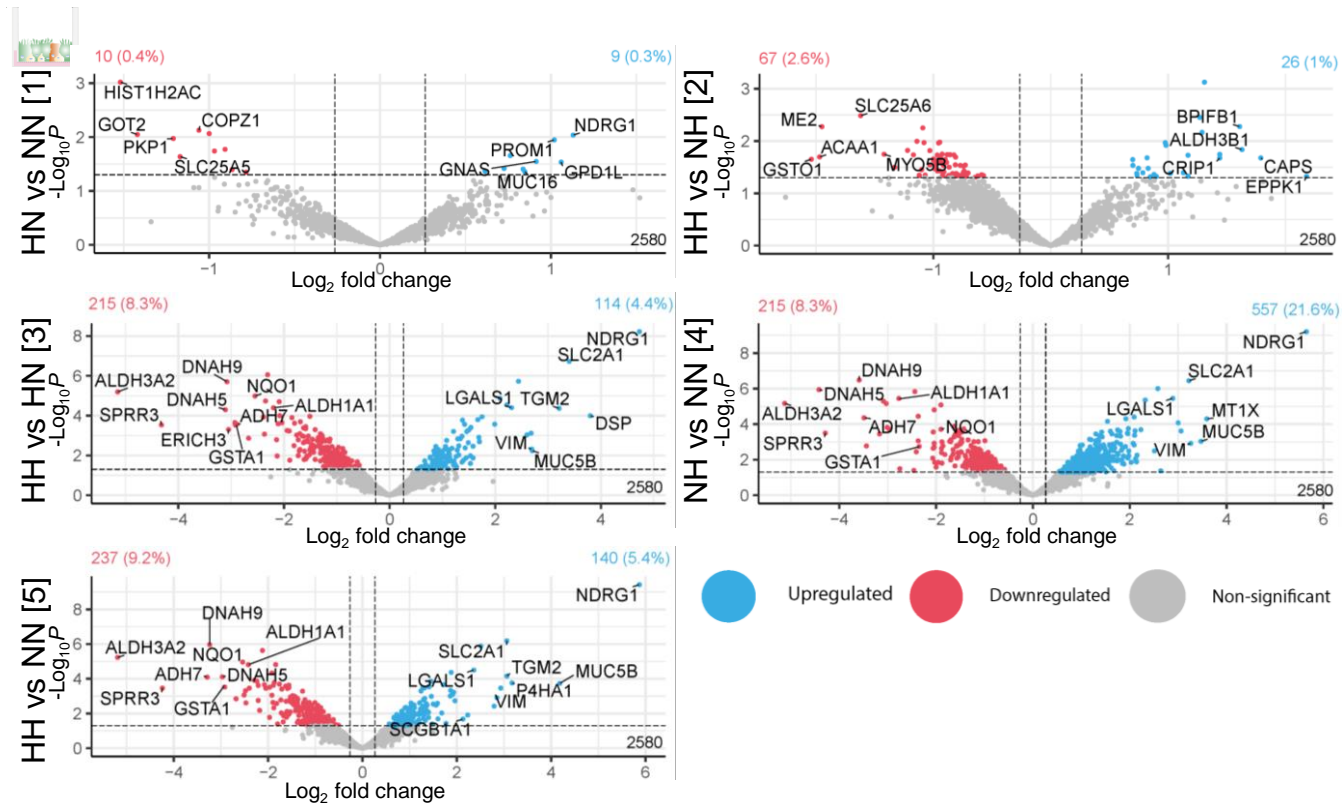

**Figure S2. Effect of chronic hypoxia on the global proteome of differentiated human nasal epithelial cells (hNECs).** Volcano plots of differentially expressed proteins (DEPs) in each oxygen condition in differentiated air-liquid interface (ALI) cultures from three non-CF participants. Dotted lines indicate significance cut-off (p-value ≤ 0.05, |fold change| ≥ 1.2). The count of significant upregulated proteins, significant downregulated proteins and total proteins are shown in top right, top left and bottom right respectively. The top 5 to 10 upregulated and downregulated proteins (determined based on logFC) are labelled. Comparisons are in pairs; [1] HN compared to NN; [2] HH compared to NH; [3] HH compared to HN; [4] NH compared to NN and [5] HH compared to NN.

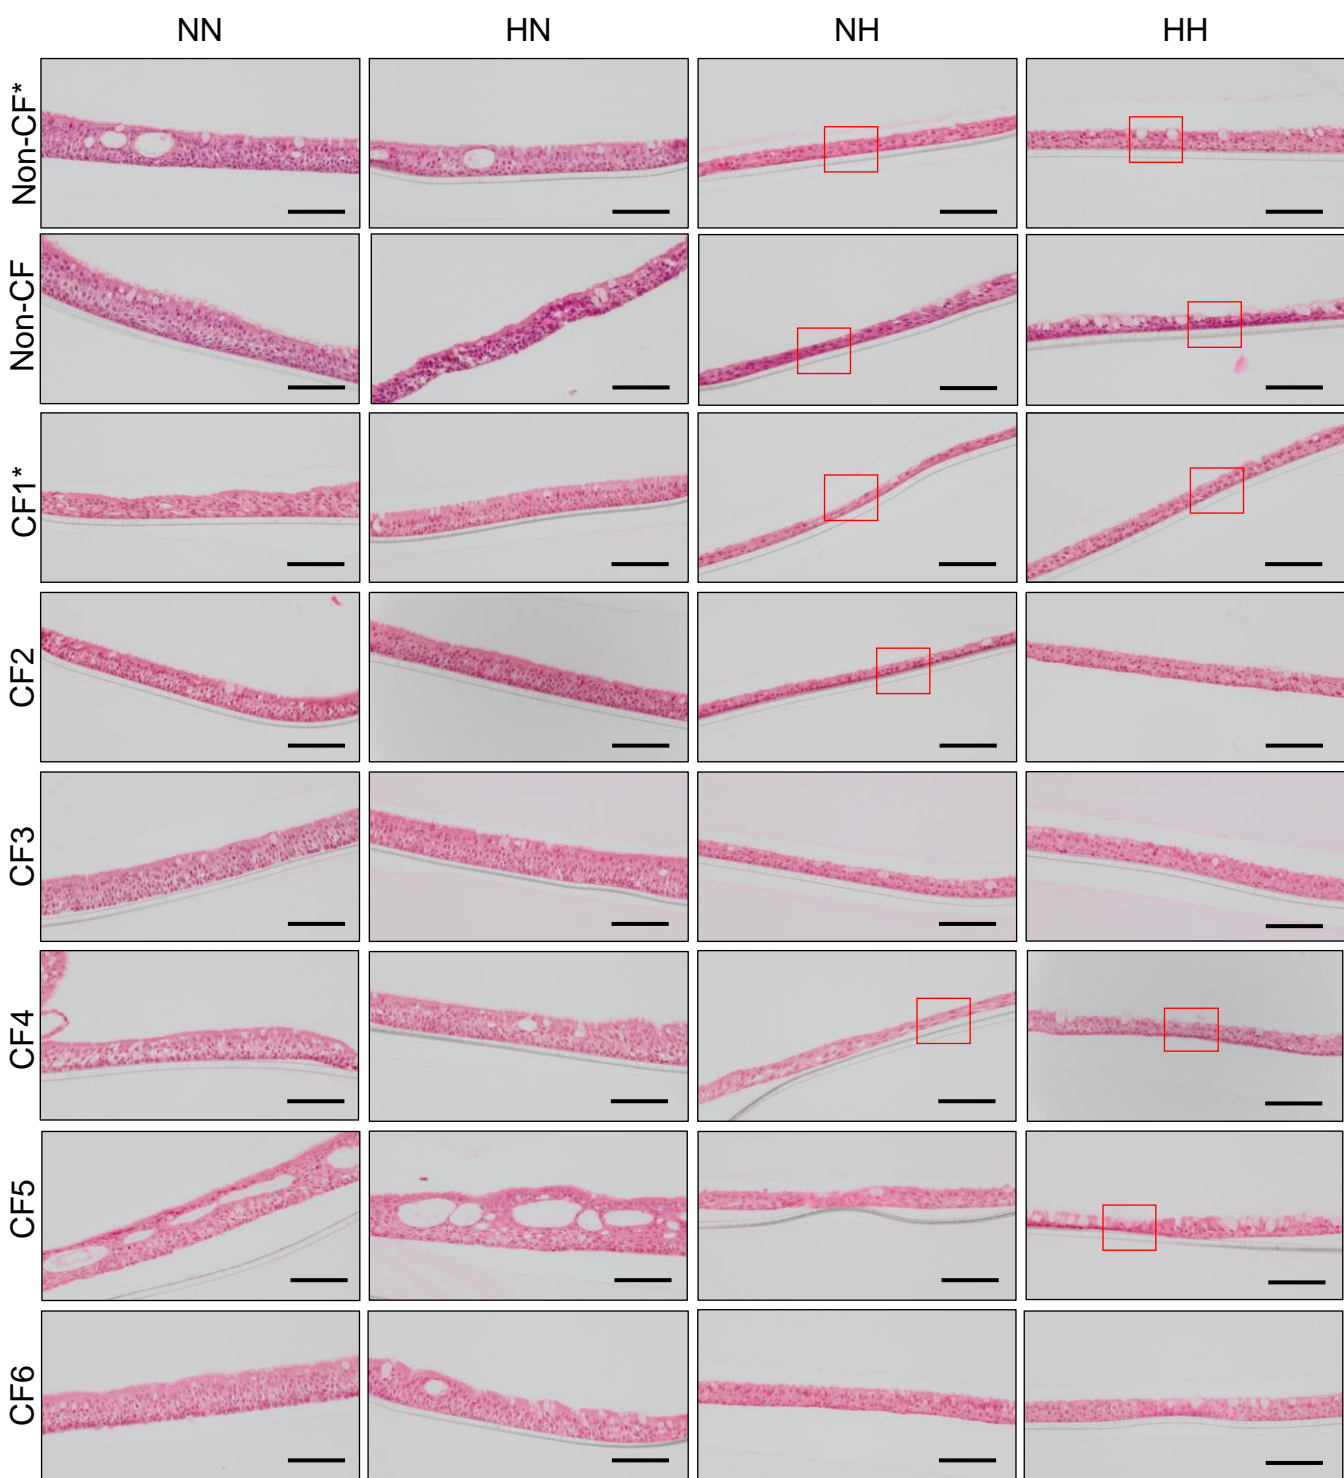

**Figure S3. H&E stain of primary hNECS from two non-CF and six CF participants differentiated at ALI in normoxia (NN and HN) and chronic hypoxia (NH and HH) for 21-25 days.** Red rectangle shows squamous cells or cells transitioning towards squamous morphology. \*indicate donor images which are displayed in Figure 4 of the main manuscript. 40x/0.8 objective. Scale bars = 100  $\mu$ m.

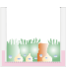

NN

HN

NH

HH

MUC5AC

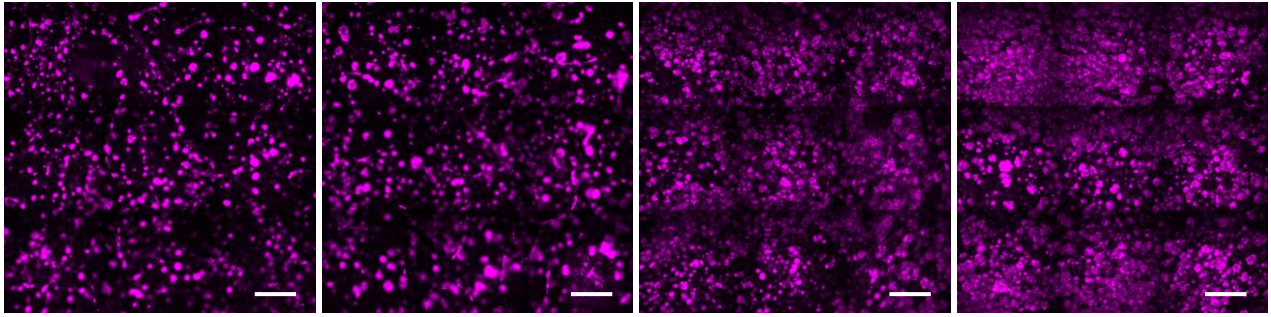

Actub

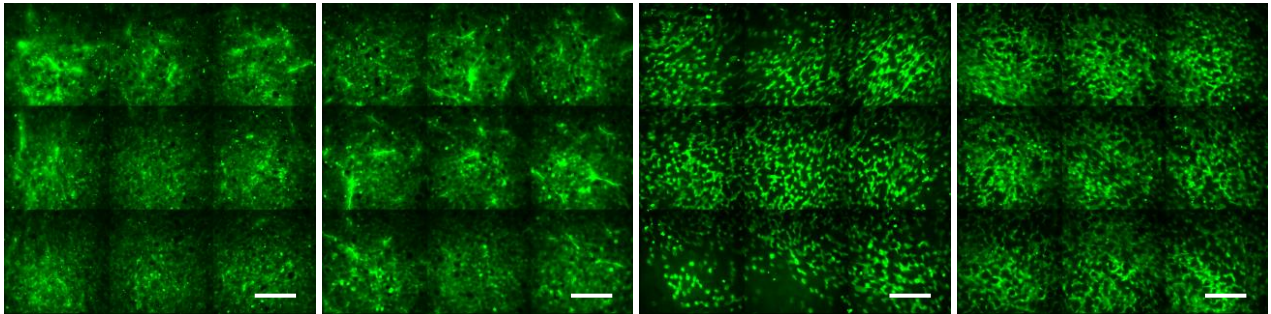

**Figure S4. Tiled images of the whole membrane with immunofluorescence staining of MUC5AC (magenta) and acetylated tubulin (actub, green). 20x/0.8 objective. Scale bars = 100 $\mu$ m.**
