# Supplementary material for: Molecular and Functional Characteristics of Airway Epithelium under Chronic Hypoxia
Source: Int J Mol Sci. 2023 Mar 30;24(7):6475. doi: 10.3390/ijms24076475 (PMC10095024; doi:10.3390/ijms24076475)
Supplement: Supplementary file 1 [file ijms-24-06475-s001.zip › Table S1_DEPs conditional reprogramming cultures_Wong et al_Submission.xlsx]

## Sheet: NonCF_Hypoxic.vs.NonCF_Normoxic
Protein	logFC	Pvalue	P.adj	protein_name
NDRG1	2.81	8.1299e-07	5.33e-13	Protein NDRG1
VIM	2.77	0.000616163	0.00885	Vimentin
KRT18	2.76	0.0250407	0.481	Keratin, type I cytoskeletal 18
H2AFY	2.66	0.0306837	0.521	Core histone macro-H2A.1
P4HA1	2.47	1.4976e-05	1.01e-09	Prolyl 4-hydroxylase subunit alpha-1
SYNE2	2.47	0.00135031	0.035	Nesprin-2
P4HA2	2.37	4.00145e-05	3.98e-07	Prolyl 4-hydroxylase subunit alpha-2
UBE2D3	2.37	0.00068655	0.0107	Ubiquitin-conjugating enzyme E2 D3;Ubiquitin-conjugating enzyme E2 D2
S100A10	2.36	0.00230615	0.0687	Protein S100-A10
HIST1H4A	2.3	0.0444445	0.584	Histone H4
H1F0	2.11	8.32162e-06	1.21e-11	Histone H1.0;Histone H1.0, N-terminally processed
SLC2A1	2.04	6.30951e-05	3.9e-06	Solute carrier family 2, facilitated glucose transporter member 1
KRT19	2.02	0.0178732	0.42	Keratin, type I cytoskeletal 19
APOL2	2.01	0.00313792	0.105	Apolipoprotein L2
CKB	1.97	0.000469476	0.00495	Creatine kinase B-type
CSRP2	1.68	2.27262e-05	1.49e-08	Cysteine and glycine-rich protein 2
INTS3	1.64	0.0197308	0.437	Integrator complex subunit 3
ATP6V0D1	1.62	0.000820014	0.0151	V-type proton ATPase subunit d 1
TPM1	1.61	0.0021153	0.0623	Tropomyosin alpha-1 chain
PLOD1	1.56	0.000333734	0.00229	Procollagen-lysine,2-oxoglutarate 5-dioxygenase 1
AHNAK	1.56	0.0252483	0.482	Neuroblast differentiation-associated protein AHNAK
FAM162A	1.54	0.00208792	0.0613	Protein FAM162A
DSP	1.48	0.0240239	0.472	Desmoplakin
CA12	1.47	0.00468766	0.165	Carbonic anhydrase 12
HIST1H2BM	1.45	0.0179688	0.421	Histone H2B type 1-M;Histone H2B type 1-N;Histone H2B type 1-H;Histone H2B type 2-F;Histone H2B type 1-C/E/F/G/I;Histone H2B type 1-D;Histone H2B type F-S;Histone H2B type 1-K;Histone H2B type 1-L
LSM1	1.45	0.0124364	0.348	U6 snRNA-associated Sm-like protein LSm1
EPPK1	1.4	0.0445492	0.584	Epiplakin
LRP1	1.32	0.0171405	0.412	Prolow-density lipoprotein receptor-related protein 1;Low-density lipoprotein receptor-related protein 1 85 kDa subunit;Low-density lipoprotein receptor-related protein 1 515 kDa subunit;Low-density lipoprotein receptor-related protein 1 intracellular domain
ERO1L	1.3	0.000541711	0.00685	ERO1-like protein alpha
PDLIM2	1.3	0.00227136	0.0675	PDZ and LIM domain protein 2
ABHD14B	1.22	0.000798142	0.0144	Alpha/beta hydrolase domain-containing protein 14B
HACD3	1.19	0.0361314	0.55	Very-long-chain (3R)-3-hydroxyacyl-CoA dehydratase 3
DPYSL2	1.18	0.00120714	0.0297	Dihydropyrimidinase-related protein 2
CLIC3	1.18	0.00499242	0.175	Chloride intracellular channel protein 3
DNPH1	1.18	0.034329	0.541	2-deoxynucleoside 5-phosphate N-hydrolase 1
H2AFV	1.18	0.0101959	0.304	Histone H2A.V;Histone H2A.Z
SLC38A2	1.17	0.000609065	0.00866	Sodium-coupled neutral amino acid transporter 2
GBE1	1.15	0.00158754	0.0428	1,4-alpha-glucan-branching enzyme
HEXB	1.06	0.00850456	0.268	Beta-hexosaminidase subunit beta;Beta-hexosaminidase subunit beta chain B;Beta-hexosaminidase subunit beta chain A
GPI	1.05	0.00390678	0.137	Glucose-6-phosphate isomerase
HNRNPAB	1.05	0.0483432	0.596	Heterogeneous nuclear ribonucleoprotein A/B
UPK3BL	1.03	0.0475781	0.594	Uroplakin-3b-like protein
LAMB3	1.02	0.000851597	0.0162	Laminin subunit beta-3
ITGA5	0.996	0.00363628	0.126	Integrin alpha-5;Integrin alpha-5 heavy chain;Integrin alpha-5 light chain
PTGR1	0.99	0.00492415	0.173	Prostaglandin reductase 1
PGK1	0.983	0.000345148	0.00249	Phosphoglycerate kinase 1
KCTD12	0.976	0.000960521	0.0201	BTB/POZ domain-containing protein KCTD12
H1FX	0.972	0.0109984	0.321	Histone H1x
RPS11	0.972	0.00873262	0.273	40S ribosomal protein S11
RPA2	0.957	0.00535873	0.187	Replication protein A 32 kDa subunit
SLC12A5	0.946	0.0323515	0.531	Solute carrier family 12 member 5;Solute carrier family 12 member 7
CES2	0.945	0.0196123	0.436	Cocaine esterase
LGALS1	0.942	0.00101814	0.0222	Galectin-1
GM2A	0.942	0.0487596	0.597	Ganglioside GM2 activator;Ganglioside GM2 activator isoform short
PEA15	0.938	0.036433	0.551	Astrocytic phosphoprotein PEA-15
SARS	0.936	0.00166965	0.0453	Serine--tRNA ligase, cytoplasmic
FNTA	0.929	0.0330261	0.534	Protein farnesyltransferase/geranylgeranyltransferase type-1 subunit alpha
RPS15A	0.924	0.00162959	0.0441	40S ribosomal protein S15a
MTX2	0.899	0.0216917	0.453	Metaxin-2
GMFB	0.89	0.0032251	0.109	Glia maturation factor beta
LGALS7	0.881	0.0292187	0.512	Galectin-7
ASS1	0.879	0.00191109	0.0548	Argininosuccinate synthase
UBE4A	0.866	0.00596799	0.206	Ubiquitin conjugation factor E4 A
TF	0.86	0.029222	0.512	Serotransferrin
ALDH7A1	0.859	0.0434052	0.58	Alpha-aminoadipic semialdehyde dehydrogenase
LDHA	0.851	0.00205775	0.0602	L-lactate dehydrogenase A chain
PCYOX1	0.843	0.0223625	0.458	Prenylcysteine oxidase 1
TPBG	0.839	0.0285473	0.507	Trophoblast glycoprotein
PLOD3	0.837	0.00190477	0.0545	Procollagen-lysine,2-oxoglutarate 5-dioxygenase 3
CARHSP1	0.825	0.0483754	0.596	Calcium-regulated heat stable protein 1
LEPRE1	0.807	0.0283298	0.506	Prolyl 3-hydroxylase 1
SCARB2	0.806	0.0145249	0.38	Lysosome membrane protein 2
TMED3	0.805	0.004891	0.172	Transmembrane emp24 domain-containing protein 3
CAV1	0.804	0.00621713	0.214	Caveolin-1
LAMC2	0.804	0.00254134	0.0777	Laminin subunit gamma-2
SH3BP1	0.803	0.00837523	0.266	SH3 domain-binding protein 1
RPL36	0.799	0.0107961	0.317	60S ribosomal protein L36
FKBP10	0.798	0.00516241	0.18	Peptidyl-prolyl cis-trans isomerase FKBP10
MGST3	0.779	0.0211984	0.449	Microsomal glutathione S-transferase 3
HIST1H1B	0.775	0.0122938	0.345	Histone H1.5
MESDC2	0.773	0.00665825	0.226	LDLR chaperone MESD
STT3A	0.763	0.0356963	0.548	Dolichyl-diphosphooligosaccharide--protein glycosyltransferase subunit STT3A
RPS26	0.762	0.0242384	0.474	40S ribosomal protein S26;Putative 40S ribosomal protein S26-like 1
SERPINH1	0.76	0.0250134	0.481	Serpin H1
RANBP3	0.757	0.00869432	0.272	Ran-binding protein 3
FLOT2	0.755	0.00338427	0.116	Flotillin-2
RPS8	0.754	0.0239687	0.472	40S ribosomal protein S8
RPL21	0.75	0.00437626	0.154	60S ribosomal protein L21
CYB5R1	0.749	0.0397964	0.566	NADH-cytochrome b5 reductase 1
ERGIC2	0.748	0.00645098	0.22	Endoplasmic reticulum-Golgi intermediate compartment protein 2
RNPS1	0.746	0.0262059	0.49	RNA-binding protein with serine-rich domain 1
CALU	0.744	0.0171082	0.412	Calumenin
TMEM43	0.742	0.0229447	0.463	Transmembrane protein 43
PTRF	0.741	0.00917998	0.281	Polymerase I and transcript release factor
PALMD	0.738	0.0234909	0.468	Palmdelphin
PFKP	0.737	0.00399304	0.14	ATP-dependent 6-phosphofructokinase, platelet type
HIST1H1E	0.729	0.02646	0.492	Histone H1.4
DDT	0.727	0.0348776	0.544	D-dopachrome decarboxylase;D-dopachrome decarboxylase-like protein
TPI1	0.727	0.00226437	0.0673	Triosephosphate isomerase
RPA3	0.723	0.0186362	0.427	Replication protein A 14 kDa subunit
ALDOC	0.717	0.0131684	0.36	Fructose-bisphosphate aldolase C
TMED7	0.708	0.040673	0.57	Transmembrane emp24 domain-containing protein 7
HEBP2	0.699	0.0167166	0.407	Heme-binding protein 2
P4HB	0.699	0.00631362	0.217	Protein disulfide-isomerase
PCK2	0.697	0.00391807	0.137	Phosphoenolpyruvate carboxykinase [GTP], mitochondrial
CD81	0.696	0.00876007	0.273	CD81 antigen
TPD52	0.683	0.0155152	0.393	Tumor protein D52
CORO1C	0.681	0.0327785	0.533	Coronin-1C
PITHD1	0.679	0.00711236	0.238	PITH domain-containing protein 1
RRM2	0.677	0.0087455	0.273	Ribonucleoside-diphosphate reductase subunit M2
EIF4A3	0.67	0.0300298	0.517	Eukaryotic initiation factor 4A-III;Eukaryotic initiation factor 4A-III, N-terminally processed
DSG2	0.665	0.0123203	0.346	Desmoglein-2
RAB21	0.664	0.0198045	0.438	Ras-related protein Rab-21
BANF1	0.66	0.0226889	0.46	Barrier-to-autointegration factor;Barrier-to-autointegration factor, N-terminally processed
RTN4	0.659	0.0113256	0.328	Reticulon-4
RPA1	0.656	0.0429886	0.578	Replication protein A 70 kDa DNA-binding subunit;Replication protein A 70 kDa DNA-binding subunit, N-terminally processed
CTBP2	0.654	0.0277118	0.501	C-terminal-binding protein 2
RPS27L	0.653	0.0175715	0.417	40S ribosomal protein S27-like
NEDD8	0.652	0.0376494	0.557	NEDD8
PFKL	0.652	0.0140294	0.373	ATP-dependent 6-phosphofructokinase, liver type
DHRS4	0.651	0.0387177	0.562	Dehydrogenase/reductase SDR family member 4;Dehydrogenase/reductase SDR family member 4-like 2
GOT1	0.648	0.0227535	0.461	Aspartate aminotransferase, cytoplasmic
TXNDC12	0.646	0.0205451	0.444	Thioredoxin domain-containing protein 12
FAM98A	0.643	0.00504267	0.177	Protein FAM98A
PGM1	0.643	0.0304513	0.519	Phosphoglucomutase-1
ATAD3B	0.636	0.0220476	0.455	ATPase family AAA domain-containing protein 3B
HIST1H1C	0.636	0.0223608	0.458	Histone H1.2
HINT2	0.635	0.00739971	0.245	Histidine triad nucleotide-binding protein 2, mitochondrial
PGRMC1	0.633	0.0412072	0.572	Membrane-associated progesterone receptor component 1
TMEM40	0.633	0.0199819	0.439	Transmembrane protein 40
MARCKSL1	0.631	0.0267962	0.495	MARCKS-related protein
HK2	0.623	0.0102371	0.305	Hexokinase-2
RPL22	0.623	0.0184292	0.425	60S ribosomal protein L22
PYCR1	0.621	0.0155651	0.394	Pyrroline-5-carboxylate reductase 1, mitochondrial
C1orf123	0.618	0.0318806	0.528	UPF0587 protein C1orf123
CUL4A	0.616	0.0144458	0.379	Cullin-4A
PRDX4	0.614	0.0189382	0.43	Peroxiredoxin-4
TIMM13	0.612	0.014931	0.386	Mitochondrial import inner membrane translocase subunit Tim13
PPP1R14C	0.611	0.0153825	0.392	Protein phosphatase 1 regulatory subunit 14C
RHOG	0.61	0.0378104	0.558	Rho-related GTP-binding protein RhoG
PGAM1	0.609	0.00889617	0.276	Phosphoglycerate mutase 1
FAM129B	0.604	0.0330293	0.534	Niban-like protein 1
ALDOA	0.601	0.00885186	0.275	Fructose-bisphosphate aldolase A
LSM14A	0.599	0.0468451	0.591	Protein LSM14 homolog A
MRPS9	0.599	0.0129663	0.357	28S ribosomal protein S9, mitochondrial
EFTUD1	0.598	0.0331944	0.535	Elongation factor Tu GTP-binding domain-containing protein 1
NHP2	0.593	0.01668	0.407	H/ACA ribonucleoprotein complex subunit 2
SMAP	0.593	0.0124586	0.348	Small acidic protein
ALYREF	0.592	0.0158474	0.397	THO complex subunit 4
DTYMK	0.587	0.0356535	0.548	Thymidylate kinase
RAB5A	0.587	0.0234378	0.467	Ras-related protein Rab-5A
CBX5	0.586	0.0166468	0.407	Chromobox protein homolog 5
DAP	0.585	0.0103645	0.308	Death-associated protein 1
OAT	0.583	0.0346672	0.543	Ornithine aminotransferase, mitochondrial;Ornithine aminotransferase, hepatic form;Ornithine aminotransferase, renal form
ENO1	0.582	0.00827382	0.264	Alpha-enolase
RRP8	0.582	0.0450638	0.586	Ribosomal RNA-processing protein 8
ATP6V1C1	0.58	0.0362971	0.551	V-type proton ATPase subunit C 1
DDOST	0.578	0.0145444	0.38	Dolichyl-diphosphooligosaccharide--protein glycosyltransferase 48 kDa subunit
HSP90B1	0.577	0.011087	0.323	Endoplasmin
ELAVL1	0.576	0.0255357	0.485	ELAV-like protein 1
RPS4Y1	0.572	0.0272881	0.498	40S ribosomal protein S4, Y isoform 1
LAMTOR3	0.571	0.028685	0.508	Ragulator complex protein LAMTOR3
RPL23	0.565	0.00841721	0.267	60S ribosomal protein L23
DKC1	0.564	0.0321728	0.53	H/ACA ribonucleoprotein complex subunit 4
PVR	0.56	0.0242366	0.474	Poliovirus receptor
PACSIN3	0.557	0.0326332	0.532	Protein kinase C and casein kinase substrate in neurons protein 3
CALD1	0.554	0.021791	0.454	Caldesmon
DOCK5	0.554	0.046273	0.59	Dedicator of cytokinesis protein 5
NDUFA9	0.553	0.0312181	0.524	NADH dehydrogenase [ubiquinone] 1 alpha subcomplex subunit 9, mitochondrial
SDHA	0.553	0.0373274	0.555	Succinate dehydrogenase [ubiquinone] flavoprotein subunit, mitochondrial
GNB2L1	0.542	0.0487602	0.597	Guanine nucleotide-binding protein subunit beta-2-like 1;Guanine nucleotide-binding protein subunit beta-2-like 1, N-terminally processed
PDIA6	0.54	0.0140521	0.373	Protein disulfide-isomerase A6
OSBPL3	0.537	0.0459851	0.589	Oxysterol-binding protein-related protein 3
GPRC5A	0.535	0.0319329	0.528	Retinoic acid-induced protein 3
RCN1	0.535	0.0226328	0.46	Reticulocalbin-1
DHX36	0.529	0.0374587	0.556	ATP-dependent RNA helicase DHX36
DDX17	0.527	0.0291878	0.511	Probable ATP-dependent RNA helicase DDX17
TMPRSS11E	0.524	0.0248643	0.479	Transmembrane protease serine 11E;Transmembrane protease serine 11E non-catalytic chain;Transmembrane protease serine 11E catalytic chain
VDAC2	0.522	0.0222471	0.457	Voltage-dependent anion-selective channel protein 2
PKM	0.52	0.0199821	0.439	Pyruvate kinase PKM
PIN1	0.518	0.0170907	0.412	Peptidyl-prolyl cis-trans isomerase NIMA-interacting 1
PAFAH1B2	0.517	0.0248854	0.479	Platelet-activating factor acetylhydrolase IB subunit beta
TMED2	0.515	0.0253447	0.483	Transmembrane emp24 domain-containing protein 2
BAZ1B	0.51	0.0366896	0.553	Tyrosine-protein kinase BAZ1B
KIAA1671	0.505	0.0175028	0.416	Uncharacterized protein KIAA1671
HP1BP3	0.502	0.0337335	0.538	Heterochromatin protein 1-binding protein 3
ILF3	0.501	0.039141	0.563	Interleukin enhancer-binding factor 3
IMUP	0.5	0.0432882	0.58	Immortalization up-regulated protein
C1QBP	0.499	0.0468807	0.592	Complement component 1 Q subcomponent-binding protein, mitochondrial
RBBP6	0.497	0.0331511	0.535	E3 ubiquitin-protein ligase RBBP6
CASP3	0.493	0.0320603	0.529	Caspase-3;Caspase-3 subunit p17;Caspase-3 subunit p12
GAPDH	0.493	0.0245754	0.477	Glyceraldehyde-3-phosphate dehydrogenase
NUTF2	0.489	0.0497051	0.6	Nuclear transport factor 2
AGO2	0.488	0.0235802	0.468	Protein argonaute-2
SMS	0.487	0.021247	0.45	Spermine synthase
NUCB1	0.486	0.0217186	0.453	Nucleobindin-1
PRPF3	0.484	0.0362417	0.551	U4/U6 small nuclear ribonucleoprotein Prp3
AKR7A2	0.482	0.0176218	0.417	Aflatoxin B1 aldehyde reductase member 2;Aflatoxin B1 aldehyde reductase member 4
RPL30	0.481	0.0416324	0.573	60S ribosomal protein L30
CRK	0.48	0.0432451	0.579	Adapter molecule crk
XPNPEP3	0.48	0.0486994	0.597	Probable Xaa-Pro aminopeptidase 3
CNN3	0.479	0.0455974	0.587	Calponin-3
DDX39B	0.474	0.0199909	0.439	Spliceosome RNA helicase DDX39B
PPM1A	0.471	0.0283793	0.506	Protein phosphatase 1A
CCDC6	0.47	0.0443987	0.583	Coiled-coil domain-containing protein 6
VDAC1	0.465	0.0301777	0.518	Voltage-dependent anion-selective channel protein 1
SF3A2	0.454	0.0480087	0.595	Splicing factor 3A subunit 2
ILVBL	0.451	0.0480586	0.595	Acetolactate synthase-like protein
RPL10	0.446	0.0263948	0.491	60S ribosomal protein L10
RPL17	0.443	0.0422186	0.576	60S ribosomal protein L17
APMAP	0.441	0.042399	0.576	Adipocyte plasma membrane-associated protein
LRRC59	0.441	0.0336327	0.538	Leucine-rich repeat-containing protein 59
BAG2	0.437	0.046645	0.591	BAG family molecular chaperone regulator 2
ENOPH1	0.432	0.0301881	0.518	Enolase-phosphatase E1
NCLN	0.432	0.034473	0.542	Nicalin
EXOSC5	0.428	0.0376292	0.557	Exosome complex component RRP46
SEC11A	0.426	0.0347235	0.543	Signal peptidase complex catalytic subunit SEC11A
CALR	0.406	0.0429	0.578	Calreticulin
TRIM33	0.406	0.041015	0.571	E3 ubiquitin-protein ligase TRIM33
SEC63	0.405	0.041521	0.573	Translocation protein SEC63 homolog
SNRPF	0.398	0.0485308	0.597	Small nuclear ribonucleoprotein F
STMN1	0.384	0.0418236	0.574	Stathmin
TALDO1	-0.373	0.0452078	0.586	Transaldolase
RAB25	-0.412	0.0429585	0.578	Ras-related protein Rab-25
FKBP4	-0.413	0.0494717	0.599	Peptidyl-prolyl cis-trans isomerase FKBP4;Peptidyl-prolyl cis-trans isomerase FKBP4, N-terminally processed
CBX3	-0.435	0.0472332	0.593	Chromobox protein homolog 3
CHP1	-0.442	0.0356525	0.548	Calcineurin B homologous protein 1
GALNT7	-0.469	0.0391382	0.563	N-acetylgalactosaminyltransferase 7
COX5A	-0.471	0.0320889	0.529	Cytochrome c oxidase subunit 5A, mitochondrial
TIPRL	-0.476	0.0405759	0.569	TIP41-like protein
SEC14L2	-0.48	0.0189637	0.43	SEC14-like protein 2
EML2	-0.481	0.0209986	0.448	Echinoderm microtubule-associated protein-like 2
AP2B1	-0.485	0.0331567	0.535	AP-2 complex subunit beta
ARHGEF16	-0.49	0.0390724	0.563	Rho guanine nucleotide exchange factor 16
BCAS2	-0.493	0.0344067	0.542	Pre-mRNA-splicing factor SPF27
VPS29	-0.511	0.0425392	0.577	Vacuolar protein sorting-associated protein 29
EPHA2	-0.517	0.0319343	0.528	Ephrin type-A receptor 2
DPP9	-0.543	0.00896492	0.277	Dipeptidyl peptidase 9
PYCARD	-0.543	0.037367	0.556	Apoptosis-associated speck-like protein containing a CARD
HMBS	-0.547	0.0125503	0.35	Porphobilinogen deaminase
FXR1	-0.555	0.0239668	0.472	Fragile X mental retardation syndrome-related protein 1
ATP13A1	-0.558	0.0368555	0.553	Manganese-transporting ATPase 13A1
IDH1	-0.563	0.0213003	0.45	Isocitrate dehydrogenase [NADP] cytoplasmic
HARS	-0.57	0.018848	0.429	Histidine--tRNA ligase, cytoplasmic
AKAP13	-0.571	0.0481734	0.596	A-kinase anchor protein 13
RAP1GDS1	-0.573	0.0207708	0.446	Rap1 GTPase-GDP dissociation stimulator 1
IRF2BP2	-0.581	0.0330125	0.534	Interferon regulatory factor 2-binding protein 2
DNAAF5	-0.583	0.0472881	0.593	Dynein assembly factor 5, axonemal
MAP7D1	-0.593	0.0217603	0.453	MAP7 domain-containing protein 1
UBXN4	-0.593	0.019587	0.436	UBX domain-containing protein 4
NSUN2	-0.597	0.0142871	0.377	tRNA (cytosine(34)-C(5))-methyltransferase
THBD	-0.598	0.044067	0.582	Thrombomodulin
FOCAD	-0.599	0.0185873	0.427	Focadhesin
AP3M1	-0.601	0.0268703	0.495	AP-3 complex subunit mu-1
DHX29	-0.602	0.0141986	0.376	ATP-dependent RNA helicase DHX29
ARFIP1	-0.609	0.0106075	0.313	Arfaptin-1
RRM1	-0.612	0.0421507	0.575	Ribonucleoside-diphosphate reductase large subunit
ECM29	-0.613	0.0424253	0.576	Proteasome-associated protein ECM29 homolog
LPXN	-0.629	0.034067	0.54	Leupaxin
WARS	-0.632	0.00917086	0.281	Tryptophan--tRNA ligase, cytoplasmic;T1-TrpRS;T2-TrpRS
MICU1	-0.635	0.0487256	0.597	Calcium uptake protein 1, mitochondrial
PSMF1	-0.646	0.0151193	0.388	Proteasome inhibitor PI31 subunit
NDUFAF2	-0.649	0.0412918	0.572	Mimitin, mitochondrial
TBL1XR1	-0.651	0.0125588	0.35	F-box-like/WD repeat-containing protein TBL1XR1
MVD	-0.657	0.0163424	0.403	Diphosphomevalonate decarboxylase
COPS4	-0.659	0.0463754	0.59	COP9 signalosome complex subunit 4
NQO1	-0.659	0.0370403	0.554	NAD(P)H dehydrogenase [quinone] 1
SNX3	-0.669	0.00651401	0.222	Sorting nexin-3
SUCLG2	-0.671	0.00607771	0.21	Succinyl-CoA ligase [GDP-forming] subunit beta, mitochondrial
AP2A1	-0.676	0.0436597	0.581	AP-2 complex subunit alpha-1
EBP	-0.686	0.026499	0.492	3-beta-hydroxysteroid-Delta(8),Delta(7)-isomerase
STXBP3	-0.693	0.0211327	0.449	Syntaxin-binding protein 3
TRIP4	-0.695	0.0312875	0.524	Activating signal cointegrator 1
SLC6A14	-0.696	0.0381458	0.559	Sodium- and chloride-dependent neutral and basic amino acid transporter B(0+)
LAP3	-0.698	0.0124678	0.348	Cytosol aminopeptidase
EDC4	-0.702	0.0167979	0.408	Enhancer of mRNA-decapping protein 4
GIGYF2	-0.705	0.0107885	0.317	PERQ amino acid-rich with GYF domain-containing protein 2
RANGAP1	-0.708	0.0384323	0.56	Ran GTPase-activating protein 1
SLMAP	-0.711	0.012626	0.351	Sarcolemmal membrane-associated protein
SMC4	-0.712	0.0374996	0.556	Structural maintenance of chromosomes protein 4
MPRIP	-0.717	0.0130495	0.358	Myosin phosphatase Rho-interacting protein
AIFM1	-0.719	0.020486	0.444	Apoptosis-inducing factor 1, mitochondrial
PDRG1	-0.719	0.0206392	0.445	p53 and DNA damage-regulated protein 1
CHERP	-0.721	0.0240648	0.473	Calcium homeostasis endoplasmic reticulum protein
SMC1A	-0.736	0.0219115	0.454	Structural maintenance of chromosomes protein 1A
DST	-0.748	0.00719617	0.24	Dystonin
YARS2	-0.766	0.0190436	0.431	Tyrosine--tRNA ligase, mitochondrial
TRAPPC6B	-0.771	0.00915711	0.28	Trafficking protein particle complex subunit 6B
G3BP1	-0.772	0.0193804	0.434	Ras GTPase-activating protein-binding protein 1
ATOX1	-0.774	0.0419945	0.575	Copper transport protein ATOX1
STAT1	-0.78	0.0256993	0.486	Signal transducer and activator of transcription 1-alpha/beta
FAM129A	-0.781	0.0151961	0.389	Protein Niban
NT5DC1	-0.784	0.0173857	0.415	5-nucleotidase domain-containing protein 1
MED1	-0.785	0.0204965	0.444	Mediator of RNA polymerase II transcription subunit 1
POLR2B	-0.797	0.0366668	0.552	DNA-directed RNA polymerase II subunit RPB2
TBRG4	-0.802	0.0191693	0.432	Protein TBRG4
GSR	-0.81	0.00859118	0.27	Glutathione reductase, mitochondrial
ACSL1	-0.816	0.0370346	0.554	Long-chain-fatty-acid--CoA ligase 1
LETM1	-0.818	0.0341622	0.54	LETM1 and EF-hand domain-containing protein 1, mitochondrial
UBQLN1	-0.824	0.00583261	0.202	Ubiquilin-1
AHCYL1	-0.832	0.0113708	0.329	Putative adenosylhomocysteinase 2
SERPINB9	-0.832	0.0097892	0.295	Serpin B9
EFHD2	-0.845	0.0112475	0.326	EF-hand domain-containing protein D2
COX5B	-0.848	0.00651469	0.222	Cytochrome c oxidase subunit 5B, mitochondrial
DAP3	-0.849	0.035359	0.546	28S ribosomal protein S29, mitochondrial
SCRIB	-0.849	0.00840452	0.266	Protein scribble homolog
NAA50	-0.851	0.00373606	0.13	N-alpha-acetyltransferase 50
DERA	-0.853	0.0321413	0.529	Deoxyribose-phosphate aldolase
SMC3	-0.857	0.00942166	0.287	Structural maintenance of chromosomes protein 3
FKBP15	-0.858	0.0169363	0.41	FK506-binding protein 15
CLPX	-0.863	0.0414402	0.573	ATP-dependent Clp protease ATP-binding subunit clpX-like, mitochondrial
SPATS2L	-0.871	0.0216102	0.452	SPATS2-like protein
SDF4	-0.879	0.0432048	0.579	45 kDa calcium-binding protein
PRRC2C	-0.883	0.00657775	0.224	Protein PRRC2C
USP15	-0.884	0.0179158	0.42	Ubiquitin carboxyl-terminal hydrolase 15
NDUFB3	-0.885	0.0214768	0.451	NADH dehydrogenase [ubiquinone] 1 beta subcomplex subunit 3
ME1	-0.896	0.00799445	0.258	NADP-dependent malic enzyme
PLS1	-0.902	0.00166762	0.0452	Plastin-1
ATP1B1	-0.905	0.0352999	0.546	Sodium/potassium-transporting ATPase subunit beta-1
ALOX15B	-0.934	0.0117063	0.335	Arachidonate 15-lipoxygenase B
G6PD	-0.936	0.0026698	0.0837	Glucose-6-phosphate 1-dehydrogenase
STK39	-0.937	0.0378358	0.558	STE20/SPS1-related proline-alanine-rich protein kinase
G3BP2	-0.945	0.03984	0.566	Ras GTPase-activating protein-binding protein 2
GBF1	-0.945	0.0259791	0.488	Golgi-specific brefeldin A-resistance guanine nucleotide exchange factor 1
NDUFA8	-0.948	0.00634928	0.218	NADH dehydrogenase [ubiquinone] 1 alpha subcomplex subunit 8
RAB3GAP2	-0.959	0.0012708	0.0321	Rab3 GTPase-activating protein non-catalytic subunit
PSME3	-0.962	0.0180727	0.422	Proteasome activator complex subunit 3
ATP1A1	-0.969	0.00404637	0.142	Sodium/potassium-transporting ATPase subunit alpha-1
GOLIM4	-0.971	0.00304222	0.101	Golgi integral membrane protein 4
IDE	-0.982	0.0117663	0.336	Insulin-degrading enzyme
MIPEP	-0.987	0.0037017	0.129	Mitochondrial intermediate peptidase
NUBP2	-0.988	0.0254974	0.484	Cytosolic Fe-S cluster assembly factor NUBP2
PCNA	-0.997	0.0166523	0.407	Proliferating cell nuclear antigen
FERMT1	-1	0.0298392	0.516	Fermitin family homolog 1
CLASP1	-1.01	0.000353946	0.00264	CLIP-associating protein 1
TNPO3	-1.02	0.0448688	0.585	Transportin-3
TPD52L1	-1.02	0.0135293	0.366	Tumor protein D53
ZMPSTE24	-1.03	0.00332758	0.113	CAAX prenyl protease 1 homolog
SRGAP1	-1.04	0.0101228	0.303	SLIT-ROBO Rho GTPase-activating protein 1
MRPS11	-1.05	0.0491577	0.598	28S ribosomal protein S11, mitochondrial
SERPINB1	-1.06	0.00121798	0.0301	Leukocyte elastase inhibitor
GCLC	-1.07	0.045573	0.587	Glutamate--cysteine ligase catalytic subunit
MAT2B	-1.08	0.00878767	0.274	Methionine adenosyltransferase 2 subunit beta
EXOSC9	-1.1	0.00494734	0.174	Exosome complex component RRP45
CSDE1	-1.11	0.00521469	0.182	Cold shock domain-containing protein E1
MAOA	-1.12	0.0297799	0.515	Amine oxidase [flavin-containing] A
ERAP1	-1.13	0.00422784	0.149	Endoplasmic reticulum aminopeptidase 1
TRIP12	-1.13	0.0180132	0.421	E3 ubiquitin-protein ligase TRIP12
CIAO1	-1.14	0.00248651	0.0755	Probable cytosolic iron-sulfur protein assembly protein CIAO1
PARP4	-1.14	0.00706921	0.237	Poly [ADP-ribose] polymerase 4
FHOD1	-1.15	0.00899799	0.278	FH1/FH2 domain-containing protein 1
PRKAG1	-1.15	0.0269413	0.496	5-AMP-activated protein kinase subunit gamma-1
GAPVD1	-1.17	0.0296403	0.514	GTPase-activating protein and VPS9 domain-containing protein 1
ASNS	-1.18	0.00433524	0.153	Asparagine synthetase [glutamine-hydrolyzing]
CLUH	-1.18	0.015047	0.387	Clustered mitochondria protein homolog
ATP1B3	-1.21	0.0139229	0.372	Sodium/potassium-transporting ATPase subunit beta-3
DHRS9	-1.21	0.00237572	0.0709	Dehydrogenase/reductase SDR family member 9
NBEAL2	-1.21	0.0466759	0.591	Neurobeachin-like protein 2
MYO18A	-1.22	0.00181996	0.0513	Unconventional myosin-XVIIIa
KLC1	-1.25	0.0485854	0.597	Kinesin light chain 1
KPNA6	-1.26	0.0319113	0.528	Importin subunit alpha-7
ARHGEF5	-1.29	0.00986493	0.297	Rho guanine nucleotide exchange factor 5
HECTD1	-1.29	0.0104727	0.31	E3 ubiquitin-protein ligase HECTD1
ACACA	-1.33	0.0136188	0.367	Acetyl-CoA carboxylase 1;Biotin carboxylase
NMES1	-1.33	0.00511037	0.179	Normal mucosa of esophagus-specific gene 1 protein
SERPINB3	-1.35	0.0324267	0.531	Serpin B3
AKR1C2	-1.36	0.0134733	0.365	Aldo-keto reductase family 1 member C2
KIAA1033	-1.36	0.00911888	0.28	WASH complex subunit 7
NRD1	-1.39	0.00146622	0.039	Nardilysin
POP1	-1.4	0.00439459	0.155	Ribonucleases P/MRP protein subunit POP1
ASCC3	-1.41	0.00124096	0.0309	Activating signal cointegrator 1 complex subunit 3
PNPT1	-1.41	0.00366538	0.127	Polyribonucleotide nucleotidyltransferase 1, mitochondrial
GOLGA4	-1.44	0.0109739	0.321	Golgin subfamily A member 4
RAD23A	-1.48	0.00155488	0.0418	UV excision repair protein RAD23 homolog A
NDUFA10	-1.48	0.0302015	0.518	NADH dehydrogenase [ubiquinone] 1 alpha subcomplex subunit 10, mitochondrial
SLFN5	-1.52	0.0349669	0.544	Schlafen family member 5
BAIAP2L1	-1.53	0.00136605	0.0355	Brain-specific angiogenesis inhibitor 1-associated protein 2-like protein 1
KYNU	-1.54	0.000119325	6.52e-05	Kynureninase
S100A9	-1.56	0.00142703	0.0376	Protein S100-A9
AKR1C3	-1.56	0.00864326	0.271	Aldo-keto reductase family 1 member C3
NUP205	-1.59	0.00652572	0.222	Nuclear pore complex protein Nup205
MAP4K4	-1.62	0.0023326	0.0695	Mitogen-activated protein kinase kinase kinase kinase 4
VPS53	-1.63	0.00915616	0.28	Vacuolar protein sorting-associated protein 53 homolog
AKR1B10	-1.66	0.000663308	0.0101	Aldo-keto reductase family 1 member B10
RIOK1	-1.88	0.000446104	0.00448	Serine/threonine-protein kinase RIO1
LCN2	-1.89	0.00780508	0.254	Neutrophil gelatinase-associated lipocalin
EPHX1	-1.91	0.000964519	0.0203	Epoxide hydrolase 1
IPO11	-1.92	0.0146288	0.382	Importin-11
SKIV2L2	-2.33	0.019181	0.432	Superkiller viralicidic activity 2-like 2
S100A8	-2.41	0.000421511	0.00398	Protein S100-A8;Protein S100-A8, N-terminally processed
ALDH3A1	-2.5	0.0181978	0.423	Aldehyde dehydrogenase, dimeric NADP-preferring
DHX30	-2.54	0.00214891	0.0634	Putative ATP-dependent RNA helicase DHX30
GLUL	-2.81	5.94797e-06	8e-13	Glutamine synthetase
LSM5	-3.19	0.00753335	0.248	U6 snRNA-associated Sm-like protein LSm5

## Sheet: CF_Hypoxic.vs.CF_Normoxic
Protein	logFC	Pvalue	P.adj	protein_name
IGFBP2	2.96	5.57931e-09	1.62e-06	Insulin-like growth factor-binding protein 2
VIM	2.8	8.80718e-08	0.000178	Vimentin
NDRG1	2.66	3.49934e-09	7.82e-07	Protein NDRG1
P4HA2	2.6	2.83939e-08	2.42e-05	Prolyl 4-hydroxylase subunit alpha-2
H1F0	2.49	3.02084e-09	7.82e-07	Histone H1.0;Histone H1.0, N-terminally processed
P4HA1	2.4	2.03355e-08	1.67e-05	Prolyl 4-hydroxylase subunit alpha-1
ENO3	2.09	1.25361e-06	0.00609	Beta-enolase
SLC2A1	2.04	2.38078e-08	1.98e-05	Solute carrier family 2, facilitated glucose transporter member 1
PLOD1	1.96	1.96431e-07	0.000569	Procollagen-lysine,2-oxoglutarate 5-dioxygenase 1
HIST2H2AA3	1.83	0.000685506	0.454	Histone H2A type 2-A;Histone H2A type 1-J;Histone H2A type 1-H;Histone H2A type 2-C;Histone H2A type 1-D;Histone H2A type 1;Histone H2A.J
LAMA3	1.74	0.000523728	0.421	Laminin subunit alpha-3
HIST1H2AC	1.7	0.00961437	0.78	Histone H2A type 1-C;Histone H2A type 3;Histone H2A type 1-B/E
LRP1	1.68	0.000161161	0.27	Prolow-density lipoprotein receptor-related protein 1;Low-density lipoprotein receptor-related protein 1 85 kDa subunit;Low-density lipoprotein receptor-related protein 1 515 kDa subunit;Low-density lipoprotein receptor-related protein 1 intracellular domain
CES2	1.67	0.00137406	0.55	Cocaine esterase
APOL2	1.65	0.000185379	0.283	Apolipoprotein L2
HIST1H4A	1.64	0.0193314	0.839	Histone H4
NOP56	1.46	6.75311e-06	0.0351	Nucleolar protein 56
COL7A1	1.46	9.8928e-05	0.222	Collagen alpha-1(VII) chain
LAMB3	1.46	0.00173808	0.579	Laminin subunit beta-3
CKB	1.44	6.89964e-05	0.19	Creatine kinase B-type
ERRFI1	1.43	2.39977e-05	0.101	ERBB receptor feedback inhibitor 1
HIST1H1E	1.43	0.00392833	0.677	Histone H1.4
HNRNPC	1.42	0.00956231	0.78	Heterogeneous nuclear ribonucleoproteins C1/C2;Heterogeneous nuclear ribonucleoprotein C-like 2
TPM1	1.4	0.000498256	0.415	Tropomyosin alpha-1 chain
ENO2	1.39	0.00260995	0.623	Gamma-enolase
AHNAK2	1.36	0.00124563	0.537	Protein AHNAK2
PLOD3	1.36	0.00033052	0.362	Procollagen-lysine,2-oxoglutarate 5-dioxygenase 3
CA2	1.34	1.21468e-06	0.00589	Carbonic anhydrase 2
PDLIM2	1.31	3.80019e-05	0.138	PDZ and LIM domain protein 2
IGFBP7	1.29	0.000718812	0.46	Insulin-like growth factor-binding protein 7
SUN2	1.26	0.00102961	0.511	SUN domain-containing protein 2
SYNE2	1.23	0.00578896	0.726	Nesprin-2
CSRP2	1.15	0.000351215	0.37	Cysteine and glycine-rich protein 2
GGA1	1.15	0.0155992	0.823	ADP-ribosylation factor-binding protein GGA1
ERO1L	1.12	2.80831e-06	0.015	ERO1-like protein alpha
DPYSL2	1.11	0.000268664	0.334	Dihydropyrimidinase-related protein 2
CA12	1.1	0.00167	0.574	Carbonic anhydrase 12
LAMC2	1.09	0.000498383	0.415	Laminin subunit gamma-2
MT1X	1.06	0.00155666	0.565	Metallothionein-1X
PGK1	1.04	2.16233e-07	0.000639	Phosphoglycerate kinase 1
NT5E	1.02	0.0297586	0.868	5-nucleotidase
PALMD	1.01	0.000126501	0.246	Palmdelphin
PLOD2	1	0.00350913	0.662	Procollagen-lysine,2-oxoglutarate 5-dioxygenase 2
PKP1	0.984	0.0484467	0.894	Plakophilin-1
RSRC2	0.983	0.00547408	0.719	Arginine/serine-rich coiled-coil protein 2
HIST1H1A	0.966	0.0020412	0.597	Histone H1.1
RPS28	0.963	0.0268493	0.862	40S ribosomal protein S28
ANLN	0.956	0.00256983	0.622	Actin-binding protein anillin
LGALS1	0.955	9.89004e-05	0.222	Galectin-1
RPS20	0.952	0.0139918	0.814	40S ribosomal protein S20
HIST1H2BM	0.934	0.0113303	0.796	Histone H2B type 1-M;Histone H2B type 1-N;Histone H2B type 1-H;Histone H2B type 2-F;Histone H2B type 1-C/E/F/G/I;Histone H2B type 1-D;Histone H2B type F-S;Histone H2B type 1-K;Histone H2B type 1-L
NOP58	0.925	0.0227606	0.851	Nucleolar protein 58
HNRNPH3	0.916	8.92502e-06	0.0438	Heterogeneous nuclear ribonucleoprotein H3
ASPH	0.915	2.81373e-05	0.113	Aspartyl/asparaginyl beta-hydroxylase
ESYT2	0.899	0.00408003	0.682	Extended synaptotagmin-2
COLGALT1	0.888	0.00120117	0.532	Procollagen galactosyltransferase 1
UAP1	0.885	0.029678	0.868	UDP-N-acetylhexosamine pyrophosphorylase;UDP-N-acetylgalactosamine pyrophosphorylase;UDP-N-acetylglucosamine pyrophosphorylase
RPL26	0.881	0.00832943	0.766	60S ribosomal protein L26
DDX18	0.878	0.0261968	0.86	ATP-dependent RNA helicase DDX18
HNRNPR	0.874	0.00624061	0.734	Heterogeneous nuclear ribonucleoprotein R
PTPRF	0.874	0.000518319	0.42	Receptor-type tyrosine-protein phosphatase F
MGST3	0.838	0.00098236	0.505	Microsomal glutathione S-transferase 3
HIST1H1B	0.831	0.00288826	0.634	Histone H1.5
FOSL2	0.827	2.31057e-05	0.0983	Fos-related antigen 2
RTN4	0.819	0.0318464	0.872	Reticulon-4
APP	0.818	0.000390254	0.384	Amyloid beta A4 protein;N-APP;Soluble APP-alpha;Soluble APP-beta;C99;Beta-amyloid protein 42;Beta-amyloid protein 40;C83;P3(42);P3(40);C80;Gamma-secretase C-terminal fragment 59;Gamma-secretase C-terminal fragment 57;Gamma-secretase C-terminal fragment 50;C31
PRKAB2	0.813	0.00053098	0.423	5-AMP-activated protein kinase subunit beta-2
CARHSP1	0.81	0.000551111	0.428	Calcium-regulated heat stable protein 1
HMGN2	0.804	0.0221139	0.849	Non-histone chromosomal protein HMG-17
CD81	0.801	0.000177629	0.279	CD81 antigen
TMED10	0.795	0.000173058	0.277	Transmembrane emp24 domain-containing protein 10
EHD2	0.788	0.00196593	0.593	EH domain-containing protein 2
CRIP2	0.783	0.00246202	0.617	Cysteine-rich protein 2
HNRNPDL	0.764	0.0237031	0.854	Heterogeneous nuclear ribonucleoprotein D-like
PTMS	0.758	0.00156566	0.566	Parathymosin
AIM1L	0.755	0.0150883	0.82	Absent in melanoma 1-like protein
HNRNPL	0.739	0.00809576	0.763	Heterogeneous nuclear ribonucleoprotein L
FBL	0.736	0.00150307	0.561	rRNA 2-O-methyltransferase fibrillarin
F3	0.734	0.000635825	0.445	Tissue factor
GPX1	0.734	0.040271	0.885	Glutathione peroxidase 1
HIST1H1C	0.734	0.000904019	0.493	Histone H1.2
HNRNPA3	0.732	0.000791948	0.474	Heterogeneous nuclear ribonucleoprotein A3
CKAP4	0.731	0.00118454	0.53	Cytoskeleton-associated protein 4
ITGA5	0.731	0.00169125	0.575	Integrin alpha-5;Integrin alpha-5 heavy chain;Integrin alpha-5 light chain
TGM1	0.73	0.00717107	0.75	Protein-glutamine gamma-glutamyltransferase K
H2AFV	0.724	0.000397626	0.386	Histone H2A.V;Histone H2A.Z
PRCC	0.719	0.00200332	0.595	Proline-rich protein PRCC
RPS21	0.719	0.0208649	0.845	40S ribosomal protein S21
FAM114A1	0.717	0.0187742	0.837	Protein NOXP20
PDIA5	0.717	0.00586261	0.727	Protein disulfide-isomerase A5
GAPDH	0.716	0.000107238	0.229	Glyceraldehyde-3-phosphate dehydrogenase
CNPY3	0.713	0.00156846	0.566	Protein canopy homolog 3
ALYREF	0.709	0.000375659	0.379	THO complex subunit 4
RPS4X	0.696	0.0178535	0.833	40S ribosomal protein S4, X isoform
SMARCC2	0.693	0.00169975	0.576	SWI/SNF complex subunit SMARCC2
ACIN1	0.692	0.0211619	0.846	Apoptotic chromatin condensation inducer in the nucleus
P4HB	0.687	7.15059e-05	0.193	Protein disulfide-isomerase
HK2	0.683	3.15331e-05	0.122	Hexokinase-2
ITGAV	0.679	0.0147275	0.818	Integrin alpha-V;Integrin alpha-V heavy chain;Integrin alpha-V light chain
HNRNPUL2	0.678	0.00380315	0.673	Heterogeneous nuclear ribonucleoprotein U-like protein 2
SRP14	0.671	6.9827e-05	0.191	Signal recognition particle 14 kDa protein
CNN3	0.664	0.0225919	0.85	Calponin-3
SRSF1	0.664	0.00978181	0.782	Serine/arginine-rich splicing factor 1
TRIP13	0.664	0.0138573	0.813	Pachytene checkpoint protein 2 homolog
RPS13	0.662	0.011943	0.8	40S ribosomal protein S13
LMNB1	0.66	0.0428933	0.888	Lamin-B1
ACTC1	0.655	0.00801513	0.762	Actin, alpha cardiac muscle 1;Actin, alpha skeletal muscle;Actin, gamma-enteric smooth muscle;Actin, aortic smooth muscle
CPOX	0.646	0.00572623	0.724	Oxygen-dependent coproporphyrinogen-III oxidase, mitochondrial
ALDOC	0.644	0.0019948	0.594	Fructose-bisphosphate aldolase C
BCAS2	0.644	0.00673463	0.743	Pre-mRNA-splicing factor SPF27
LDHA	0.64	0.0268538	0.862	L-lactate dehydrogenase A chain
STX4	0.639	0.000385797	0.382	Syntaxin-4
RPS15A	0.636	0.00703507	0.748	40S ribosomal protein S15a
DDAH1	0.631	0.00444375	0.693	N(G),N(G)-dimethylarginine dimethylaminohydrolase 1
RFTN1	0.628	0.024242	0.855	Raftlin
TPI1	0.627	0.000222878	0.308	Triosephosphate isomerase
AK4	0.625	0.0323876	0.873	Adenylate kinase 4, mitochondrial
B2M	0.62	0.0078272	0.759	Beta-2-microglobulin;Beta-2-microglobulin form pI 5.3
RNMT	0.617	0.000610489	0.44	mRNA cap guanine-N7 methyltransferase
SRSF7	0.617	0.003982	0.679	Serine/arginine-rich splicing factor 7
VDAC1	0.617	0.00327004	0.652	Voltage-dependent anion-selective channel protein 1
LEPRE1	0.616	0.00452023	0.695	Prolyl 3-hydroxylase 1
ARPC5	0.614	0.00367781	0.668	Actin-related protein 2/3 complex subunit 5
ABHD14B	0.607	0.0450267	0.891	Alpha/beta hydrolase domain-containing protein 14B
CDA	0.606	0.00141371	0.553	Cytidine deaminase
TXNDC12	0.606	0.00485268	0.704	Thioredoxin domain-containing protein 12
SRP9	0.605	0.00566128	0.723	Signal recognition particle 9 kDa protein
ILF3	0.604	0.00323537	0.65	Interleukin enhancer-binding factor 3
SH3GL1	0.603	0.00566479	0.723	Endophilin-A2
KCTD12	0.596	0.0054034	0.718	BTB/POZ domain-containing protein KCTD12
OXR1	0.595	0.00388398	0.676	Oxidation resistance protein 1
PITHD1	0.595	0.000396269	0.386	PITH domain-containing protein 1
PTRF	0.591	0.00259355	0.623	Polymerase I and transcript release factor
RPL28	0.591	0.00168329	0.575	60S ribosomal protein L28
RPL21	0.586	0.00240891	0.615	60S ribosomal protein L21
SARS	0.586	0.0090357	0.774	Serine--tRNA ligase, cytoplasmic
HP1BP3	0.579	0.00887331	0.772	Heterochromatin protein 1-binding protein 3
CTBP2	0.578	0.00208607	0.599	C-terminal-binding protein 2
PLCB3	0.578	0.0332404	0.874	1-phosphatidylinositol 4,5-bisphosphate phosphodiesterase beta-3
KIAA1524	0.575	0.00508276	0.71	Protein CIP2A
GPI	0.572	0.019954	0.842	Glucose-6-phosphate isomerase
LMNB2	0.572	0.0103133	0.787	Lamin-B2
LMAN1	0.571	0.00432174	0.69	Protein ERGIC-53
PALLD	0.571	0.0200403	0.842	Palladin
PFKP	0.571	0.00284389	0.632	ATP-dependent 6-phosphofructokinase, platelet type
AGTRAP	0.569	0.0187517	0.837	Type-1 angiotensin II receptor-associated protein
GBE1	0.558	0.0125583	0.805	1,4-alpha-glucan-branching enzyme
FXR2	0.555	0.00187087	0.587	Fragile X mental retardation syndrome-related protein 2
ACOT9	0.553	0.0131766	0.809	Acyl-coenzyme A thioesterase 9, mitochondrial
CALU	0.552	0.00109186	0.519	Calumenin
TMEM40	0.551	0.0431915	0.889	Transmembrane protein 40
IDH2	0.549	0.0129257	0.807	Isocitrate dehydrogenase [NADP], mitochondrial
TMED3	0.547	0.00215215	0.603	Transmembrane emp24 domain-containing protein 3
LPCAT4	0.543	0.0272666	0.863	Lysophospholipid acyltransferase LPCAT4
FNDC3B	0.542	0.0424717	0.888	Fibronectin type III domain-containing protein 3B
RAVER1	0.538	0.00542316	0.718	Ribonucleoprotein PTB-binding 1
IRF6	0.537	0.00215389	0.603	Interferon regulatory factor 6
RHOC	0.532	0.015787	0.824	Rho-related GTP-binding protein RhoC
RPS7	0.532	0.0061538	0.733	40S ribosomal protein S7
LMNA	0.53	0.00269241	0.626	Prelamin-A/C;Lamin-A/C
SRSF6	0.529	0.0059443	0.729	Serine/arginine-rich splicing factor 6
EIF4A2	0.528	0.0482959	0.894	Eukaryotic initiation factor 4A-II;Eukaryotic initiation factor 4A-II, N-terminally processed
PGAM1	0.528	0.00106872	0.517	Phosphoglycerate mutase 1
NAV1	0.527	0.00343803	0.659	Neuron navigator 1
RNPS1	0.526	0.0447664	0.89	RNA-binding protein with serine-rich domain 1
RPS2	0.525	0.0448145	0.89	40S ribosomal protein S2
HEXB	0.523	0.0288671	0.866	Beta-hexosaminidase subunit beta;Beta-hexosaminidase subunit beta chain B;Beta-hexosaminidase subunit beta chain A
ENO1	0.521	7.81698e-05	0.201	Alpha-enolase
HMGB2	0.521	0.0483183	0.894	High mobility group protein B2
ACSF2	0.52	0.00386679	0.675	Acyl-CoA synthetase family member 2, mitochondrial
LARP1	0.52	0.0141791	0.815	La-related protein 1
ESYT1	0.519	0.00108477	0.519	Extended synaptotagmin-1
FAM83A	0.519	0.0393563	0.884	Protein FAM83A
SLMAP	0.516	0.0145605	0.817	Sarcolemmal membrane-associated protein
CALD1	0.512	0.002771	0.629	Caldesmon
ALDOA	0.51	0.00599601	0.73	Fructose-bisphosphate aldolase A
PDLIM4	0.51	0.0357381	0.879	PDZ and LIM domain protein 4
WAPAL	0.51	0.0016192	0.57	Wings apart-like protein homolog
ARHGEF10	0.509	0.0124181	0.804	Rho guanine nucleotide exchange factor 10
PRCP	0.507	0.00223053	0.607	Lysosomal Pro-X carboxypeptidase
TPM2	0.507	0.0221292	0.849	Tropomyosin beta chain
POFUT1	0.503	0.00143565	0.555	GDP-fucose protein O-fucosyltransferase 1
RPA1	0.503	0.0114416	0.797	Replication protein A 70 kDa DNA-binding subunit;Replication protein A 70 kDa DNA-binding subunit, N-terminally processed
LAMTOR1	0.501	0.0159435	0.825	Ragulator complex protein LAMTOR1
RPL23A	0.501	0.00559816	0.722	60S ribosomal protein L23a
RRAS	0.5	0.00906832	0.774	Ras-related protein R-Ras
TPM4	0.5	0.00213959	0.602	Tropomyosin alpha-4 chain
RPS3A	0.495	0.00338927	0.657	40S ribosomal protein S3a
PGRMC1	0.49	0.00715072	0.75	Membrane-associated progesterone receptor component 1
CETN2	0.489	0.0122717	0.803	Centrin-2
SLC16A3	0.488	0.0215108	0.847	Monocarboxylate transporter 4
ARL6IP5	0.487	0.046355	0.892	PRA1 family protein 3
EGFR	0.487	0.00916119	0.775	Epidermal growth factor receptor
SCRN1	0.486	0.00307789	0.643	Secernin-1
MBOAT7	0.484	0.0130946	0.809	Lysophospholipid acyltransferase 7
MTMR1	0.482	0.00385309	0.674	Myotubularin-related protein 1
PGRMC2	0.482	0.0230684	0.852	Membrane-associated progesterone receptor component 2
FKBP2	0.477	0.000845977	0.484	Peptidyl-prolyl cis-trans isomerase FKBP2
WDR5	0.476	0.0303256	0.869	WD repeat-containing protein 5
CCDC6	0.475	0.00552692	0.72	Coiled-coil domain-containing protein 6
KDSR	0.475	0.00391221	0.677	3-ketodihydrosphingosine reductase
PFKL	0.473	0.00948873	0.779	ATP-dependent 6-phosphofructokinase, liver type
SIL1	0.473	0.000835517	0.482	Nucleotide exchange factor SIL1
STMN1	0.473	0.0209108	0.845	Stathmin
ARHGEF7	0.47	0.00907394	0.775	Rho guanine nucleotide exchange factor 7
RPL11	0.467	0.0419759	0.887	60S ribosomal protein L11
PHGDH	0.466	0.0318706	0.872	D-3-phosphoglycerate dehydrogenase
SCARB2	0.466	0.0421054	0.887	Lysosome membrane protein 2
CTSZ	0.462	0.0392226	0.884	Cathepsin Z
NPEPPS	0.461	0.00576801	0.725	Puromycin-sensitive aminopeptidase
PDIA3	0.461	0.00102601	0.511	Protein disulfide-isomerase A3
PGM1	0.456	0.0331106	0.874	Phosphoglucomutase-1
PDIA6	0.453	0.00124673	0.537	Protein disulfide-isomerase A6
DFNA5	0.45	0.0108865	0.792	Non-syndromic hearing impairment protein 5
ALCAM	0.449	0.00260304	0.623	CD166 antigen
SF3B5	0.449	0.011524	0.797	Splicing factor 3B subunit 5
HK1	0.448	0.0260337	0.86	Hexokinase-1
RPN2	0.448	0.0386194	0.883	Dolichyl-diphosphooligosaccharide--protein glycosyltransferase subunit 2
RTKN	0.448	0.0193591	0.839	Rhotekin
PDXK	0.447	0.0144097	0.817	Pyridoxal kinase
GSN	0.446	0.0147461	0.818	Gelsolin
PGM3	0.446	0.0296003	0.868	Phosphoacetylglucosamine mutase
RAP2B	0.443	0.0367431	0.88	Ras-related protein Rap-2b
CCDC124	0.442	0.00286756	0.633	Coiled-coil domain-containing protein 124
DDX39A	0.441	0.0350327	0.877	ATP-dependent RNA helicase DDX39A
SF3A2	0.439	0.0385859	0.883	Splicing factor 3A subunit 2
RPL10	0.437	0.0438856	0.889	60S ribosomal protein L10
SERPINH1	0.435	0.0270862	0.862	Serpin H1
STT3B	0.435	0.0253446	0.858	Dolichyl-diphosphooligosaccharide--protein glycosyltransferase subunit STT3B
TOP1	0.435	0.0227049	0.851	DNA topoisomerase 1
RAB5A	0.434	0.0481734	0.894	Ras-related protein Rab-5A
RAB32	0.43	0.0333958	0.875	Ras-related protein Rab-32
RCN2	0.422	0.0349112	0.877	Reticulocalbin-2
RPL17	0.422	0.0156609	0.823	60S ribosomal protein L17
MCFD2	0.42	0.0258955	0.859	Multiple coagulation factor deficiency protein 2
HPRT1	0.419	0.0286812	0.866	Hypoxanthine-guanine phosphoribosyltransferase
HSP90B1	0.418	0.0072665	0.751	Endoplasmin
RPL13A	0.415	0.041797	0.887	60S ribosomal protein L13a
OAT	0.414	0.00976395	0.782	Ornithine aminotransferase, mitochondrial;Ornithine aminotransferase, hepatic form;Ornithine aminotransferase, renal form
PPME1	0.413	0.00978373	0.782	Protein phosphatase methylesterase 1
UBE2O	0.408	0.0251272	0.857	E2/E3 hybrid ubiquitin-protein ligase UBE2O
FAM162A	0.407	0.0190055	0.838	Protein FAM162A
SPAG1	0.407	0.049284	0.895	Sperm-associated antigen 1
PRRC1	0.406	0.0473183	0.893	Protein PRRC1
DDX23	0.405	0.0384367	0.882	Probable ATP-dependent RNA helicase DDX23
PIN4	0.403	0.00795041	0.761	Peptidyl-prolyl cis-trans isomerase NIMA-interacting 4
GBP1	0.402	0.0301906	0.869	Interferon-induced guanylate-binding protein 1
RPSA	0.402	0.0361369	0.879	40S ribosomal protein SA
COX20	0.401	0.0067313	0.743	Cytochrome c oxidase protein 20 homolog
NUCB1	0.401	0.0438966	0.889	Nucleobindin-1
PKM	0.401	0.00850722	0.768	Pyruvate kinase PKM
RPL13	0.401	0.0411979	0.886	60S ribosomal protein L13
RBPMS	0.398	0.00840898	0.767	RNA-binding protein with multiple splicing
HNRNPF	0.396	0.0218653	0.848	Heterogeneous nuclear ribonucleoprotein F;Heterogeneous nuclear ribonucleoprotein F, N-terminally processed
PRKCSH	0.395	0.0319867	0.872	Glucosidase 2 subunit beta
TPD52	0.393	0.034896	0.877	Tumor protein D52
PRDX5	0.391	0.0288287	0.866	Peroxiredoxin-5, mitochondrial
SARNP	0.39	0.0306073	0.87	SAP domain-containing ribonucleoprotein
ACTN1	0.388	0.0125653	0.805	Alpha-actinin-1
BCAP31	0.388	0.0341695	0.876	B-cell receptor-associated protein 31
YWHAH	0.387	0.00582157	0.726	14-3-3 protein eta
NCL	0.386	0.0125286	0.805	Nucleolin
DDX39B	0.385	0.0174529	0.832	Spliceosome RNA helicase DDX39B
CECR5	0.383	0.0178068	0.833	Cat eye syndrome critical region protein 5
CNPY2	0.383	0.0470288	0.893	Protein canopy homolog 2
MARCKSL1	0.382	0.0343394	0.876	MARCKS-related protein
PDIA4	0.376	0.00235708	0.613	Protein disulfide-isomerase A4
LRRC40	0.375	0.0128239	0.807	Leucine-rich repeat-containing protein 40
SGPL1	0.374	0.0308457	0.87	Sphingosine-1-phosphate lyase 1
TSC22D2	0.371	0.018246	0.835	TSC22 domain family protein 2
ECHDC1	0.368	0.0377439	0.881	Ethylmalonyl-CoA decarboxylase
PTBP1	0.368	0.00896364	0.773	Polypyrimidine tract-binding protein 1
SUMF2	0.367	0.0400288	0.885	Sulfatase-modifying factor 2
CWC15	0.366	0.0175817	0.832	Spliceosome-associated protein CWC15 homolog
UQCRB	0.366	0.0401499	0.885	Cytochrome b-c1 complex subunit 7
RPS14	0.362	0.0454549	0.891	40S ribosomal protein S14
TM9SF4	0.362	0.0303664	0.869	Transmembrane 9 superfamily member 4
HDLBP	0.361	0.0176413	0.833	Vigilin
ERP44	0.36	0.0232902	0.852	Endoplasmic reticulum resident protein 44
RPN1	0.36	0.0241906	0.855	Dolichyl-diphosphooligosaccharide--protein glycosyltransferase subunit 1
UBE2G2	0.36	0.0425062	0.888	Ubiquitin-conjugating enzyme E2 G2
CMAS	0.359	0.0408989	0.886	N-acylneuraminate cytidylyltransferase
RAB1B	0.359	0.0174378	0.832	Ras-related protein Rab-1B;Putative Ras-related protein Rab-1C
VCP	0.358	0.00865938	0.77	Transitional endoplasmic reticulum ATPase
ERLIN2	0.355	0.0281543	0.865	Erlin-2
SSR4	0.355	0.0276256	0.863	Translocon-associated protein subunit delta
CHCHD2	0.353	0.0286507	0.866	Coiled-coil-helix-coiled-coil-helix domain-containing protein 2;Putative coiled-coil-helix-coiled-coil-helix domain-containing protein CHCHD2P9, mitochondrial
DTYMK	0.349	0.0204108	0.843	Thymidylate kinase
UQCRC1	0.348	0.02112	0.846	Cytochrome b-c1 complex subunit 1, mitochondrial
WDR44	0.348	0.0305153	0.869	WD repeat-containing protein 44
EDF1	0.338	0.0135818	0.812	Endothelial differentiation-related factor 1
LRPAP1	0.338	0.0195602	0.84	Alpha-2-macroglobulin receptor-associated protein
RAB18	0.337	0.0361799	0.879	Ras-related protein Rab-18
PIGK	0.336	0.0211305	0.846	GPI-anchor transamidase
PAFAH1B1	0.335	0.0113518	0.796	Platelet-activating factor acetylhydrolase IB subunit alpha
UGGT1	0.333	0.00813239	0.763	UDP-glucose:glycoprotein glucosyltransferase 1
COL17A1	0.332	0.037388	0.881	Collagen alpha-1(XVII) chain;120 kDa linear IgA disease antigen;97 kDa linear IgA disease antigen
PANX1	0.331	0.0313344	0.871	Pannexin-1
UBFD1	0.329	0.00678949	0.744	Ubiquitin domain-containing protein UBFD1
UGP2	0.329	0.0104852	0.789	UTP--glucose-1-phosphate uridylyltransferase
FAM129B	0.326	0.0160691	0.825	Niban-like protein 1
NTMT1	0.325	0.0089063	0.773	N-terminal Xaa-Pro-Lys N-methyltransferase 1;N-terminal Xaa-Pro-Lys N-methyltransferase 1, N-terminally processed
SPATS2	0.325	0.0361258	0.879	Spermatogenesis-associated serine-rich protein 2
SF3B2	0.323	0.0475495	0.893	Splicing factor 3B subunit 2
ADSS	0.316	0.0174109	0.832	Adenylosuccinate synthetase isozyme 2
FTSJ3	0.314	0.0405672	0.885	pre-rRNA processing protein FTSJ3
MYH10	0.314	0.0164648	0.827	Myosin-10
IK	0.306	0.0480561	0.894	Protein Red
RAB14	0.3	0.0424165	0.888	Ras-related protein Rab-14
RPS6	0.3	0.0140852	0.815	40S ribosomal protein S6
MYH9	0.296	0.0427716	0.888	Myosin-9
CLIC4	0.289	0.0456241	0.891	Chloride intracellular channel protein 4
HNRNPK	0.285	0.0418312	0.887	Heterogeneous nuclear ribonucleoprotein K
CALR	0.284	0.0297237	0.868	Calreticulin
FLNA	0.284	0.0359401	0.879	Filamin-A
PLS3	0.281	0.0435931	0.889	Plastin-3
HMGB1	0.272	0.0437324	0.889	High mobility group protein B1;Putative high mobility group protein B1-like 1
QDPR	0.269	0.0483754	0.894	Dihydropteridine reductase
RAB5B	0.268	0.028002	0.864	Ras-related protein Rab-5B
PHF5A	-0.268	0.0456283	0.891	PHD finger-like domain-containing protein 5A
DBNL	-0.283	0.0352944	0.878	Drebrin-like protein
EIF4A1	-0.288	0.0186862	0.837	Eukaryotic initiation factor 4A-I
EIF3A	-0.29	0.0194275	0.84	Eukaryotic translation initiation factor 3 subunit A
MIPEP	-0.298	0.0413696	0.886	Mitochondrial intermediate peptidase
OLA1	-0.302	0.0376163	0.881	Obg-like ATPase 1
SEC24C	-0.309	0.0266486	0.861	Protein transport protein Sec24C
CTTN	-0.315	0.021221	0.846	Src substrate cortactin
ELP2	-0.318	0.035881	0.879	Elongator complex protein 2
SRA1	-0.318	0.0458413	0.892	Steroid receptor RNA activator 1
SUGT1	-0.319	0.0231573	0.852	Suppressor of G2 allele of SKP1 homolog
HSD17B10	-0.328	0.0321224	0.872	3-hydroxyacyl-CoA dehydrogenase type-2
PAIP1	-0.33	0.0227168	0.851	Polyadenylate-binding protein-interacting protein 1
DNAJA1	-0.332	0.0183552	0.836	DnaJ homolog subfamily A member 1
FKBP4	-0.332	0.0183962	0.836	Peptidyl-prolyl cis-trans isomerase FKBP4;Peptidyl-prolyl cis-trans isomerase FKBP4, N-terminally processed
EIF3E	-0.333	0.0336682	0.875	Eukaryotic translation initiation factor 3 subunit E
HSD17B4	-0.333	0.0185224	0.836	Peroxisomal multifunctional enzyme type 2;(3R)-hydroxyacyl-CoA dehydrogenase;Enoyl-CoA hydratase 2
ZC3H7A	-0.336	0.0251746	0.857	Zinc finger CCCH domain-containing protein 7A
COG1	-0.342	0.0488755	0.895	Conserved oligomeric Golgi complex subunit 1
ACOT7	-0.347	0.0444774	0.89	Cytosolic acyl coenzyme A thioester hydrolase
LAS1L	-0.347	0.0374547	0.881	Ribosomal biogenesis protein LAS1L
VASP	-0.348	0.0261356	0.86	Vasodilator-stimulated phosphoprotein
LGALSL	-0.349	0.0493467	0.895	Galectin-related protein
MRPL53	-0.354	0.0157435	0.824	39S ribosomal protein L53, mitochondrial
TSSC1	-0.355	0.0161793	0.826	Protein TSSC1
CEP170	-0.356	0.0231631	0.852	Centrosomal protein of 170 kDa
CIB1	-0.358	0.0414107	0.886	Calcium and integrin-binding protein 1
WARS	-0.358	0.0232169	0.852	Tryptophan--tRNA ligase, cytoplasmic;T1-TrpRS;T2-TrpRS
IPO5	-0.359	0.0194757	0.84	Importin-5
MLST8	-0.36	0.0026285	0.624	Target of rapamycin complex subunit LST8
TRAPPC8	-0.36	0.0462445	0.892	Trafficking protein particle complex subunit 8
KLK6	-0.362	0.00987852	0.783	Kallikrein-6
PUS7	-0.365	0.0365402	0.88	Pseudouridylate synthase 7 homolog
KIAA1279	-0.366	0.0323512	0.873	KIF1-binding protein
TRAFD1	-0.367	0.0408995	0.886	TRAF-type zinc finger domain-containing protein 1
ARHGEF18	-0.372	0.0258488	0.859	Rho guanine nucleotide exchange factor 18
SEC14L2	-0.372	0.048208	0.894	SEC14-like protein 2
STAM	-0.375	0.00349631	0.661	Signal transducing adapter molecule 1
TJP2	-0.378	0.00998852	0.784	Tight junction protein ZO-2
TTC37	-0.38	0.04485	0.89	Tetratricopeptide repeat protein 37
MAT2B	-0.391	0.0223673	0.85	Methionine adenosyltransferase 2 subunit beta
DYNC1LI1	-0.392	0.00522269	0.713	Cytoplasmic dynein 1 light intermediate chain 1
TKT	-0.392	0.0280289	0.864	Transketolase
DHX29	-0.394	0.0214851	0.847	ATP-dependent RNA helicase DHX29
FAM136A	-0.395	0.0187194	0.837	Protein FAM136A
ATXN10	-0.397	0.00592728	0.729	Ataxin-10
NSUN2	-0.401	0.0371063	0.881	tRNA (cytosine(34)-C(5))-methyltransferase
PACSIN3	-0.401	0.0148573	0.819	Protein kinase C and casein kinase substrate in neurons protein 3
EIF4B	-0.403	0.0273217	0.863	Eukaryotic translation initiation factor 4B
BRI3BP	-0.404	0.0370661	0.881	BRI3-binding protein
FOCAD	-0.404	0.0377633	0.882	Focadhesin
MARS	-0.407	0.0444817	0.89	Methionine--tRNA ligase, cytoplasmic
POLR1C	-0.409	0.00973968	0.781	DNA-directed RNA polymerases I and III subunit RPAC1
ZNFX1	-0.409	0.0366249	0.88	NFX1-type zinc finger-containing protein 1
HMGA1	-0.41	0.012555	0.805	High mobility group protein HMG-I/HMG-Y
LARP4	-0.41	0.011924	0.8	La-related protein 4
ACSL3	-0.411	0.00368422	0.668	Long-chain-fatty-acid--CoA ligase 3
CBR1	-0.413	0.029698	0.868	Carbonyl reductase [NADPH] 1
DDX42	-0.415	0.031902	0.872	ATP-dependent RNA helicase DDX42
MICAL1	-0.415	0.0193986	0.84	Protein-methionine sulfoxide oxidase MICAL1
NAPG	-0.421	0.0296846	0.868	Gamma-soluble NSF attachment protein
G3BP1	-0.422	0.00702225	0.748	Ras GTPase-activating protein-binding protein 1
MRPS35	-0.423	0.00524915	0.714	28S ribosomal protein S35, mitochondrial
CTNND1	-0.424	0.00563979	0.723	Catenin delta-1
AHCTF1	-0.428	0.0414813	0.886	Protein ELYS
NOL6	-0.43	0.00324909	0.651	Nucleolar protein 6
CYB5A	-0.432	0.043209	0.889	Cytochrome b5
RPS6KA1	-0.433	0.0131217	0.809	Ribosomal protein S6 kinase alpha-1
CAPRIN1	-0.435	0.00644871	0.738	Caprin-1
WDR18	-0.439	0.00459169	0.697	WD repeat-containing protein 18
YTHDF3	-0.44	0.0338168	0.875	YTH domain-containing family protein 3
DDX5	-0.442	0.0155905	0.823	Probable ATP-dependent RNA helicase DDX5
PPP2R1B	-0.442	0.0127879	0.806	Serine/threonine-protein phosphatase 2A 65 kDa regulatory subunit A beta isoform
METAP2	-0.445	0.019663	0.841	Methionine aminopeptidase 2
PSMG1	-0.445	0.0259458	0.859	Proteasome assembly chaperone 1
MRPL14	-0.447	0.0356288	0.878	39S ribosomal protein L14, mitochondrial
DCPS	-0.448	0.00278799	0.63	m7GpppX diphosphatase
PFDN5	-0.449	0.0244286	0.856	Prefoldin subunit 5
SRPK1	-0.451	0.0198238	0.841	SRSF protein kinase 1
AP3M1	-0.453	0.0122273	0.803	AP-3 complex subunit mu-1
SERPINB9	-0.453	0.0116301	0.798	Serpin B9
WDR26	-0.454	0.00958342	0.78	WD repeat-containing protein 26
CMPK1	-0.458	0.0165189	0.828	UMP-CMP kinase
TUBGCP2	-0.458	0.00388458	0.676	Gamma-tubulin complex component 2
MTAP	-0.46	0.0205352	0.844	S-methyl-5-thioadenosine phosphorylase
APEH	-0.462	0.0221785	0.849	Acylamino-acid-releasing enzyme
MRPS23	-0.464	0.00166977	0.574	28S ribosomal protein S23, mitochondrial
STUB1	-0.467	0.0077826	0.759	E3 ubiquitin-protein ligase CHIP
ARFIP1	-0.47	0.0218754	0.848	Arfaptin-1
DFFA	-0.474	0.0262955	0.86	DNA fragmentation factor subunit alpha
DLG1	-0.474	0.000627291	0.444	Disks large homolog 1
EPHA2	-0.475	0.015417	0.822	Ephrin type-A receptor 2
SEC23B	-0.476	0.000320396	0.358	Protein transport protein Sec23B
STAT3	-0.477	0.0446445	0.89	Signal transducer and activator of transcription 3
MRPS11	-0.478	0.00610215	0.732	28S ribosomal protein S11, mitochondrial
STX18	-0.48	0.0295131	0.867	Syntaxin-18
GUK1	-0.481	0.0361988	0.879	Guanylate kinase
ASCC2	-0.482	0.0176453	0.833	Activating signal cointegrator 1 complex subunit 2
CSTF2	-0.482	0.0289273	0.866	Cleavage stimulation factor subunit 2
SYMPK	-0.482	0.0262015	0.86	Symplekin
C1QBP	-0.483	0.02387	0.854	Complement component 1 Q subcomponent-binding protein, mitochondrial
HGS	-0.485	0.0301473	0.869	Hepatocyte growth factor-regulated tyrosine kinase substrate
COX6B1	-0.486	0.00522881	0.714	Cytochrome c oxidase subunit 6B1
UMPS	-0.487	0.0116785	0.798	Uridine 5-monophosphate synthase;Orotate phosphoribosyltransferase;Orotidine 5-phosphate decarboxylase
PIP4K2C	-0.488	0.0107786	0.791	Phosphatidylinositol 5-phosphate 4-kinase type-2 gamma
STK39	-0.489	0.0059725	0.729	STE20/SPS1-related proline-alanine-rich protein kinase
PLAA	-0.496	0.0424701	0.888	Phospholipase A-2-activating protein
UNC45A	-0.507	0.00794849	0.761	Protein unc-45 homolog A
S100A16	-0.511	0.00913961	0.775	Protein S100-A16
SDC1	-0.511	0.00823626	0.765	Syndecan-1
SEC61A1	-0.512	0.0298489	0.868	Protein transport protein Sec61 subunit alpha isoform 1
RAP1GDS1	-0.513	0.0164325	0.827	Rap1 GTPase-GDP dissociation stimulator 1
NDUFA9	-0.514	0.0423604	0.888	NADH dehydrogenase [ubiquinone] 1 alpha subcomplex subunit 9, mitochondrial
ATG3	-0.515	0.0227167	0.851	Ubiquitin-like-conjugating enzyme ATG3
CSDE1	-0.516	0.0227387	0.851	Cold shock domain-containing protein E1
NUP37	-0.516	0.0135013	0.811	Nucleoporin Nup37
ITGA3	-0.517	0.0384631	0.883	Integrin alpha-3;Integrin alpha-3 heavy chain;Integrin alpha-3 light chain
SLC25A10	-0.517	0.0100134	0.784	Mitochondrial dicarboxylate carrier
SARG	-0.519	0.00147011	0.558	Specifically androgen-regulated gene protein
TNS4	-0.521	0.0210727	0.846	Tensin-4
ME2	-0.523	0.0222366	0.849	NAD-dependent malic enzyme, mitochondrial
SETD3	-0.523	0.000919832	0.496	Histone-lysine N-methyltransferase setd3
RPRD1B	-0.526	0.0474409	0.893	Regulation of nuclear pre-mRNA domain-containing protein 1B
ABCC1	-0.527	0.0124207	0.804	Multidrug resistance-associated protein 1
NAA15	-0.529	0.00730454	0.752	N-alpha-acetyltransferase 15, NatA auxiliary subunit
SPECC1L	-0.529	0.0158351	0.824	Cytospin-A
RANGAP1	-0.532	0.0118527	0.8	Ran GTPase-activating protein 1
DHX36	-0.535	0.00901649	0.774	ATP-dependent RNA helicase DHX36
KIF1B	-0.536	0.00393796	0.677	Kinesin-like protein KIF1B
MRPL3	-0.536	0.0173561	0.831	39S ribosomal protein L3, mitochondrial
YARS2	-0.538	0.0215783	0.847	Tyrosine--tRNA ligase, mitochondrial
CUL2	-0.541	0.0266526	0.861	Cullin-2
FDPS	-0.546	0.00825999	0.765	Farnesyl pyrophosphate synthase
CUL4A	-0.548	0.000136905	0.254	Cullin-4A
ANKRD17	-0.55	0.00418643	0.685	Ankyrin repeat domain-containing protein 17
MTSS1	-0.551	0.0208288	0.845	Metastasis suppressor protein 1
PDE12	-0.558	0.00015575	0.266	2,5-phosphodiesterase 12
EIF2B2	-0.56	0.00573459	0.725	Translation initiation factor eIF-2B subunit beta
TRAP1	-0.562	0.0337882	0.875	Heat shock protein 75 kDa, mitochondrial
DDX3X	-0.564	0.00497487	0.707	ATP-dependent RNA helicase DDX3X
PLEKHG3	-0.564	0.0160229	0.825	Pleckstrin homology domain-containing family G member 3
DBI	-0.565	0.0469568	0.893	Acyl-CoA-binding protein
PCBP2	-0.566	0.000402355	0.388	Poly(rC)-binding protein 2
PDS5A	-0.566	0.0360586	0.879	Sister chromatid cohesion protein PDS5 homolog A
ZNF598	-0.567	0.00237002	0.613	Zinc finger protein 598
PLS1	-0.57	0.0020465	0.597	Plastin-1
PGD	-0.575	0.0288069	0.866	6-phosphogluconate dehydrogenase, decarboxylating
MRPS27	-0.578	0.00150691	0.561	28S ribosomal protein S27, mitochondrial
MRPS9	-0.58	0.000167687	0.274	28S ribosomal protein S9, mitochondrial
PRMT5	-0.585	0.00878135	0.771	Protein arginine N-methyltransferase 5;Protein arginine N-methyltransferase 5, N-terminally processed
PIK3R4	-0.586	0.00359916	0.665	Phosphoinositide 3-kinase regulatory subunit 4
BIRC6	-0.592	0.00068133	0.454	Baculoviral IAP repeat-containing protein 6
CLPX	-0.594	0.0178636	0.834	ATP-dependent Clp protease ATP-binding subunit clpX-like, mitochondrial
ATP5C1	-0.595	0.0170514	0.83	ATP synthase subunit gamma, mitochondrial
DNAJC7	-0.597	0.00478184	0.703	DnaJ homolog subfamily C member 7
MARK3	-0.6	0.0266414	0.861	MAP/microtubule affinity-regulating kinase 3
EFHD2	-0.601	0.000408719	0.39	EF-hand domain-containing protein D2
LIN7C	-0.601	0.0300219	0.868	Protein lin-7 homolog C
SDCBP2	-0.601	0.0445197	0.89	Syntenin-2
G3BP2	-0.604	0.00157782	0.567	Ras GTPase-activating protein-binding protein 2
GPS1	-0.604	0.00878103	0.771	COP9 signalosome complex subunit 1
GCLC	-0.608	0.0315259	0.871	Glutamate--cysteine ligase catalytic subunit
PRKCI	-0.608	0.00186525	0.587	Protein kinase C iota type
PSMA4	-0.61	0.0487613	0.895	Proteasome subunit alpha type-4
RIOK1	-0.61	0.0129086	0.807	Serine/threonine-protein kinase RIO1
CNP	-0.614	0.000441435	0.4	2,3-cyclic-nucleotide 3-phosphodiesterase
CAB39	-0.619	0.0352725	0.878	Calcium-binding protein 39
RBM3	-0.619	0.00718011	0.75	RNA-binding protein 3
SSH3	-0.619	0.0028253	0.631	Protein phosphatase Slingshot homolog 3
HINT2	-0.623	0.0406546	0.885	Histidine triad nucleotide-binding protein 2, mitochondrial
DDX50	-0.625	7.27713e-05	0.195	ATP-dependent RNA helicase DDX50
GAPVD1	-0.627	0.0258179	0.859	GTPase-activating protein and VPS9 domain-containing protein 1
BAG3	-0.628	0.00450646	0.695	BAG family molecular chaperone regulator 3
GLTP	-0.628	0.0178203	0.833	Glycolipid transfer protein
MRPL4	-0.631	0.0133862	0.81	39S ribosomal protein L4, mitochondrial
ATP1B1	-0.634	0.0111297	0.794	Sodium/potassium-transporting ATPase subunit beta-1
COPS5	-0.636	0.0180222	0.834	COP9 signalosome complex subunit 5
NDUFB3	-0.637	0.00580088	0.726	NADH dehydrogenase [ubiquinone] 1 beta subcomplex subunit 3
DDX21	-0.65	0.0158665	0.824	Nucleolar RNA helicase 2
C6orf132	-0.651	0.0142329	0.816	Uncharacterized protein C6orf132
SNX5	-0.655	0.00227199	0.609	Sorting nexin-5
TJP1	-0.656	0.0019997	0.595	Tight junction protein ZO-1
PSME4	-0.659	0.0025063	0.619	Proteasome activator complex subunit 4
DIS3	-0.662	0.000848753	0.484	Exosome complex exonuclease RRP44
SYPL1	-0.663	0.000689617	0.455	Synaptophysin-like protein 1
NPM3	-0.664	0.0132447	0.809	Nucleoplasmin-3
TIPRL	-0.667	0.00049476	0.414	TIP41-like protein
BROX	-0.673	0.0102813	0.787	BRO1 domain-containing protein BROX
SERPINB1	-0.673	0.00427448	0.688	Leukocyte elastase inhibitor
AHCYL1	-0.674	0.00585836	0.727	Putative adenosylhomocysteinase 2
PFDN6	-0.674	0.0119567	0.801	Prefoldin subunit 6
CNOT1	-0.675	0.00356592	0.664	CCR4-NOT transcription complex subunit 1
MYBBP1A	-0.675	0.00955687	0.78	Myb-binding protein 1A
IDH1	-0.681	9.187e-05	0.215	Isocitrate dehydrogenase [NADP] cytoplasmic
NCAPG	-0.681	0.00137867	0.55	Condensin complex subunit 3
TXLNA	-0.682	0.00328723	0.653	Alpha-taxilin
KIAA1033	-0.693	0.003078	0.643	WASH complex subunit 7
HECTD1	-0.694	0.0027464	0.628	E3 ubiquitin-protein ligase HECTD1
NUBP2	-0.696	0.0166142	0.828	Cytosolic Fe-S cluster assembly factor NUBP2
SLC9A3R1	-0.699	0.00751884	0.755	Na(+)/H(+) exchange regulatory cofactor NHE-RF1
COX5B	-0.7	0.00155806	0.565	Cytochrome c oxidase subunit 5B, mitochondrial
GTF2I	-0.7	0.016589	0.828	General transcription factor II-I
CHD1	-0.705	0.000104527	0.227	Chromodomain-helicase-DNA-binding protein 1
MYO18A	-0.71	0.00089404	0.492	Unconventional myosin-XVIIIa
NT5C2	-0.725	0.0124074	0.804	Cytosolic purine 5-nucleotidase
MRPL28	-0.728	0.0199364	0.842	39S ribosomal protein L28, mitochondrial
APOBEC3C	-0.729	0.00845248	0.767	DNA dC->dU-editing enzyme APOBEC-3C
STK17A	-0.731	8.91194e-06	0.0437	Serine/threonine-protein kinase 17A
KLC1	-0.736	0.00150443	0.561	Kinesin light chain 1
NAPRT	-0.738	0.0447287	0.89	Nicotinate phosphoribosyltransferase
PRKAR1A	-0.744	0.00224068	0.607	cAMP-dependent protein kinase type I-alpha regulatory subunit;cAMP-dependent protein kinase type I-alpha regulatory subunit, N-terminally processed
SNAP23	-0.758	0.000179547	0.28	Synaptosomal-associated protein 23
CLUH	-0.761	0.000675594	0.453	Clustered mitochondria protein homolog
LRPPRC	-0.771	2.99922e-05	0.118	Leucine-rich PPR motif-containing protein, mitochondrial
SCRIB	-0.775	0.0453663	0.891	Protein scribble homolog
ERBB2IP	-0.782	4.61035e-05	0.154	Protein LAP2
MAST4	-0.787	0.000512687	0.419	Microtubule-associated serine/threonine-protein kinase 4
SRP54	-0.788	0.0127745	0.806	Signal recognition particle 54 kDa protein
SLFN5	-0.79	0.0124275	0.804	Schlafen family member 5
LAP3	-0.795	0.0251704	0.857	Cytosol aminopeptidase
RAB27B	-0.806	0.000570959	0.432	Ras-related protein Rab-27B
XRN2	-0.817	0.0102623	0.786	5-3 exoribonuclease 2
STX12	-0.824	0.0409895	0.886	Syntaxin-12
SQSTM1	-0.826	0.0121741	0.802	Sequestosome-1
ATP6V1C1	-0.827	0.00193358	0.591	V-type proton ATPase subunit C 1
UBQLN1	-0.827	0.0210797	0.846	Ubiquilin-1
NBEAL2	-0.839	0.00594364	0.729	Neurobeachin-like protein 2
EPCAM	-0.846	0.0102298	0.786	Epithelial cell adhesion molecule
MRPS5	-0.847	0.000642477	0.447	28S ribosomal protein S5, mitochondrial
NELFB	-0.851	0.00342766	0.659	Negative elongation factor B
MT-CO2	-0.852	0.00315769	0.647	Cytochrome c oxidase subunit 2
KLC2	-0.853	0.0130242	0.808	Kinesin light chain 2
FASN	-0.859	5.69252e-06	0.0303	Fatty acid synthase;[Acyl-carrier-protein] S-acetyltransferase;[Acyl-carrier-protein] S-malonyltransferase;3-oxoacyl-[acyl-carrier-protein] synthase;3-oxoacyl-[acyl-carrier-protein] reductase;3-hydroxyacyl-[acyl-carrier-protein] dehydratase;Enoyl-[acyl-carrier-protein] reductase;Oleoyl-[acyl-carrier-protein] hydrolase
PAPSS1	-0.859	0.0214225	0.847	Bifunctional 3-phosphoadenosine 5-phosphosulfate synthase 1;Sulfate adenylyltransferase;Adenylyl-sulfate kinase
DST	-0.864	0.0416323	0.887	Dystonin
IL18	-0.864	0.0496342	0.895	Interleukin-18
ADIRF	-0.869	0.00847879	0.768	Adipogenesis regulatory factor
NQO1	-0.885	0.00160694	0.569	NAD(P)H dehydrogenase [quinone] 1
RAD23A	-0.911	0.0161436	0.826	UV excision repair protein RAD23 homolog A
SLIRP	-0.918	0.000321143	0.358	SRA stem-loop-interacting RNA-binding protein, mitochondrial
ATP1A1	-0.921	7.28173e-07	0.0033	Sodium/potassium-transporting ATPase subunit alpha-1
PSME3	-0.933	0.0103105	0.787	Proteasome activator complex subunit 3
SPRR1B	-0.943	0.000394557	0.385	Cornifin-B
NOL3	-0.944	0.0198228	0.841	Nucleolar protein 3
ASCC3	-0.945	0.00866334	0.77	Activating signal cointegrator 1 complex subunit 3
SDF4	-0.952	0.0377955	0.882	45 kDa calcium-binding protein
LDLR	-0.956	0.00039623	0.386	Low-density lipoprotein receptor
IPO11	-0.957	0.00750382	0.755	Importin-11
BAG5	-0.963	0.000867683	0.487	BAG family molecular chaperone regulator 5
SERPINB3	-0.966	0.00390485	0.676	Serpin B3
CLCA4	-0.974	0.000152008	0.264	Calcium-activated chloride channel regulator 4;Calcium-activated chloride channel regulator 4, 110 kDa form;Calcium-activated chloride channel regulator 4, 30 kDa form
PARP4	-0.975	0.0175288	0.832	Poly [ADP-ribose] polymerase 4
PRRC2C	-0.984	0.00471448	0.701	Protein PRRC2C
LRRC1	-1.01	0.00268225	0.626	Leucine-rich repeat-containing protein 1
ANXA1	-1.02	0.00403854	0.681	Annexin A1
SKIV2L2	-1.02	0.00193202	0.591	Superkiller viralicidic activity 2-like 2
SPRR2D	-1.02	0.0183514	0.836	Small proline-rich protein 2D
GSR	-1.03	0.0125848	0.805	Glutathione reductase, mitochondrial
TRIP12	-1.03	0.000475306	0.409	E3 ubiquitin-protein ligase TRIP12
ANXA11	-1.06	0.013759	0.813	Annexin A11
G6PD	-1.06	0.00196268	0.593	Glucose-6-phosphate 1-dehydrogenase
MAP4K4	-1.06	0.00050354	0.416	Mitogen-activated protein kinase kinase kinase kinase 4
SLC4A7	-1.06	0.000492856	0.414	Sodium bicarbonate cotransporter 3
GEMIN5	-1.07	0.00877171	0.771	Gem-associated protein 5
SLC6A14	-1.07	0.0299853	0.868	Sodium- and chloride-dependent neutral and basic amino acid transporter B(0+)
STAT1	-1.07	0.000294043	0.346	Signal transducer and activator of transcription 1-alpha/beta
AKR1C3	-1.09	9.93809e-05	0.222	Aldo-keto reductase family 1 member C3
PI3	-1.1	0.0135012	0.811	Elafin
SKIV2L	-1.11	0.00951281	0.779	Helicase SKI2W
KPNA1	-1.12	0.00572023	0.724	Importin subunit alpha-5;Importin subunit alpha-5, N-terminally processed
MAOA	-1.12	0.00219162	0.605	Amine oxidase [flavin-containing] A
DAP3	-1.13	0.0009407	0.499	28S ribosomal protein S29, mitochondrial
FERMT1	-1.15	0.0154931	0.822	Fermitin family homolog 1
SPRR1A	-1.15	0.00021575	0.304	Cornifin-A
ATP1B3	-1.16	6.81006e-05	0.189	Sodium/potassium-transporting ATPase subunit beta-3
HMBS	-1.17	0.00437149	0.691	Porphobilinogen deaminase
PPP4R1	-1.18	4.96913e-05	0.161	Serine/threonine-protein phosphatase 4 regulatory subunit 1
TBRG4	-1.19	9.03232e-06	0.0441	Protein TBRG4
FAM83H	-1.19	0.0346443	0.877	Protein FAM83H
IDE	-1.19	0.00277397	0.629	Insulin-degrading enzyme
DHRS9	-1.32	0.006458	0.738	Dehydrogenase/reductase SDR family member 9
POP1	-1.33	4.11526e-05	0.145	Ribonucleases P/MRP protein subunit POP1
AKR1C2	-1.38	0.0028281	0.631	Aldo-keto reductase family 1 member C2
EPHX1	-1.4	0.0174108	0.832	Epoxide hydrolase 1
ACACA	-1.42	5.34908e-05	0.167	Acetyl-CoA carboxylase 1;Biotin carboxylase
ARFGEF1	-1.43	0.0256882	0.859	Brefeldin A-inhibited guanine nucleotide-exchange protein 1
KYNU	-1.43	0.00071261	0.459	Kynureninase
ARHGEF2	-1.44	0.000177647	0.279	Rho guanine nucleotide exchange factor 2
KPNA2	-1.55	0.0382809	0.882	Importin subunit alpha-1
NRD1	-1.57	1.19809e-05	0.0571	Nardilysin
S100A9	-1.65	2.56494e-06	0.0137	Protein S100-A9
CRNN	-1.66	0.0350161	0.877	Cornulin
AKR1B10	-1.83	0.000161881	0.27	Aldo-keto reductase family 1 member B10
ME1	-1.99	0.00231914	0.611	NADP-dependent malic enzyme
GLUL	-2.49	1.58001e-08	1.2e-05	Glutamine synthetase
S100A8	-3.02	2.58833e-07	0.000782	Protein S100-A8;Protein S100-A8, N-terminally processed
