# Supplementary material for: Molecular and Functional Characteristics of Airway Epithelium under Chronic Hypoxia
Source: Int J Mol Sci. 2023 Mar 30;24(7):6475. doi: 10.3390/ijms24076475 (PMC10095024; doi:10.3390/ijms24076475)
Supplement: Supplementary file 1 [file ijms-24-06475-s001.zip › Table S2_DEPs air-liquid interface cultures_Wong et al_Submission.xlsx]

## Sheet: NonCF_HN.vs.NonCF_NN_PAIR 1
NonCF_HN.vs.NonCF_NN [PAIR 1]
Protein	logFC	Pvalue	P.adj	protein_name
NDRG1	1.13	0.00916879	8.44e-06	Protein NDRG1
GPD1L	1.06	0.0290397	0.00108	Glycerol-3-phosphate dehydrogenase 1-like protein
PROM1	1.02	0.0112489	1.82e-05	Prominin-1
GNAS	0.914	0.0282755	0.000982	Guanine nucleotide-binding protein G(s) subunit alpha isoforms XLas
MUC16	0.847	0.0436803	0.00477	Mucin-16
RSPH9	0.837	0.0392417	0.00343	Radial spoke head protein 9 homolog
PSCA	0.762	0.0220038	0.000365	Prostate stem cell antigen
RPS6KA1	0.726	0.0381977	0.00313	Ribosomal protein S6 kinase alpha-1
RAP1B	0.614	0.0429653	0.00455	Ras-related protein Rap-1b;Ras-related protein Rap-1b-like protein
SRSF7	-0.784	0.0448026	0.00512	Serine/arginine-rich splicing factor 7
ALDH6A1	-0.866	0.0401591	0.0037	Methylmalonate-semialdehyde dehydrogenase [acylating], mitochondrial
H2AFV	-0.907	0.0168473	0.000123	Histone H2A.V;Histone H2A.Z
TUBA1C	-0.969	0.0181117	0.000163	Tubulin alpha-1C chain
NDRG2	-1	0.00860078	7.78e-06	Protein NDRG2
COPZ1	-1.06	0.00745061	5.88e-06	Coatomer subunit zeta-1
SLC25A5	-1.17	0.0230313	0.00043	ADP/ATP translocase 2;ADP/ATP translocase 2, N-terminally processed
PKP1	-1.21	0.0105891	1.49e-05	Plakophilin-1
GOT2	-1.42	0.00894817	8.21e-06	Aspartate aminotransferase, mitochondrial
HIST1H2AC	-1.52	0.000954981	1.72e-11	Histone H2A type 1-C;Histone H2A type 3;Histone H2A type 1-B/E

## Sheet: NonCF_HH.vs.NonCF_NH_PAIR 2
NonCF_HH.vs.NonCF_NH [PAIR 2]
Protein	logFC	Pvalue	P.adj	protein_name
EPPK1	2.18	0.0472661	0.0673	Epiplakin
CAPS	1.79	0.0210142	0.0308	Calcyphosin
ALDH3B1	1.63	0.0145647	0.0225	Aldehyde dehydrogenase family 3 member B1
BPIFB1	1.61	0.00528797	0.00449	BPI fold-containing family B member 1
CRIP1	1.44	0.021005	0.0308	Cysteine-rich protein 1
DNAH5	1.44	0.0179981	0.0275	Dynein heavy chain 5, axonemal
AGR3	1.31	0.000748398	3.35e-05	Anterior gradient protein 3 homolog
SRSF1	1.29	0.00680679	0.00713	Serine/arginine-rich splicing factor 1
TUBA1C	1.27	0.0035285	0.00239	Tubulin alpha-1C chain
MANF	1.17	0.0186745	0.0283	Mesencephalic astrocyte-derived neurotrophic factor
LMAN1	1.17	0.0470886	0.0671	Protein ERGIC-53
ALCAM	1.13	0.0403511	0.0603	CD166 antigen
BANF1	1.02	0.0413795	0.0615	Barrier-to-autointegration factor;Barrier-to-autointegration factor, N-terminally processed
LZTFL1	0.982	0.0120291	0.0175	Leucine zipper transcription factor-like protein 1
DDX39B	0.976	0.0107494	0.0148	Spliceosome RNA helicase DDX39B
SRSF3	0.9	0.0473788	0.0674	Serine/arginine-rich splicing factor 3
SAMHD1	0.88	0.0433817	0.0636	Deoxynucleoside triphosphate triphosphohydrolase SAMHD1
PRPF40A	0.848	0.0483379	0.0686	Pre-mRNA-processing factor 40 homolog A
GLOD4	0.83	0.0333235	0.0507	Glyoxalase domain-containing protein 4
UGDH	0.821	0.0209234	0.0307	UDP-glucose 6-dehydrogenase
TPPP3	0.785	0.0403662	0.0603	Tubulin polymerization-promoting protein family member 3
SSB	0.748	0.0332724	0.0507	Lupus La protein
SNX2	0.735	0.0452543	0.0655	Sorting nexin-2
KTN1	0.733	0.0416631	0.0618	Kinectin
ALDH9A1	0.7	0.0292432	0.0438	4-trimethylaminobutyraldehyde dehydrogenase
IARS2	0.699	0.02262	0.0321	Isoleucine--tRNA ligase, mitochondrial
UQCRC1	-0.573	0.0457143	0.0659	Cytochrome b-c1 complex subunit 1, mitochondrial
FKBP15	-0.589	0.0441024	0.0643	FK506-binding protein 15
TMED7	-0.622	0.0464963	0.0666	Transmembrane emp24 domain-containing protein 7
YWHAQ	-0.645	0.0493133	0.0698	14-3-3 protein theta
PLEKHS1	-0.704	0.0407859	0.0608	Pleckstrin homology domain-containing family S member 1
ADD1	-0.72	0.0468156	0.0669	Alpha-adducin
NCLN	-0.728	0.0287812	0.0431	Nicalin
EXOC7	-0.736	0.0437348	0.064	Exocyst complex component 7
DCTN4	-0.738	0.0374135	0.0567	Dynactin subunit 4
RECQL	-0.742	0.0302599	0.0456	ATP-dependent DNA helicase Q1
DDX42	-0.744	0.0429221	0.0631	ATP-dependent RNA helicase DDX42
TTC25	-0.745	0.0401384	0.0601	Tetratricopeptide repeat protein 25
GART	-0.76	0.0450326	0.0652	Trifunctional purine biosynthetic protein adenosine-3;Phosphoribosylamine--glycine ligase;Phosphoribosylformylglycinamidine cyclo-ligase;Phosphoribosylglycinamide formyltransferase
RPS6KA1	-0.77	0.0293295	0.044	Ribosomal protein S6 kinase alpha-1
MBOAT2	-0.792	0.0440645	0.0643	Lysophospholipid acyltransferase 2
DDOST	-0.794	0.0459829	0.0661	Dolichyl-diphosphooligosaccharide--protein glycosyltransferase 48 kDa subunit
DLG1	-0.806	0.0416286	0.0618	Disks large homolog 1
NCCRP1	-0.811	0.0203062	0.0301	F-box only protein 50
NAMPT	-0.813	0.0284417	0.0425	Nicotinamide phosphoribosyltransferase
SKIV2L	-0.818	0.0469289	0.067	Helicase SKI2W
NPEPPS	-0.825	0.0183771	0.028	Puromycin-sensitive aminopeptidase
RPS26	-0.837	0.0418327	0.062	40S ribosomal protein S26;Putative 40S ribosomal protein S26-like 1
G3BP1	-0.841	0.0433639	0.0636	Ras GTPase-activating protein-binding protein 1
ASPSCR1	-0.844	0.0488628	0.0692	Tether containing UBX domain for GLUT4
PDHA1	-0.858	0.0182575	0.0279	Pyruvate dehydrogenase E1 component subunit alpha, somatic form, mitochondrial
PON2	-0.866	0.0316619	0.048	Serum paraoxonase/arylesterase 2
PNP	-0.869	0.0452826	0.0655	Purine nucleoside phosphorylase
PTPN23	-0.879	0.0483104	0.0685	Tyrosine-protein phosphatase non-receptor type 23
ANP32E	-0.882	0.0182007	0.0278	Acidic leucine-rich nuclear phosphoprotein 32 family member E
DDX46	-0.887	0.0256327	0.0376	Probable ATP-dependent RNA helicase DDX46
HK2	-0.899	0.0225972	0.0321	Hexokinase-2
GBP6	-0.91	0.0389296	0.0586	Guanylate-binding protein 6
GOLGA3	-0.913	0.0389413	0.0586	Golgin subfamily A member 3
SRP9	-0.915	0.0291962	0.0437	Signal recognition particle 9 kDa protein
HMG20A	-0.922	0.0454067	0.0656	High mobility group protein 20A
CRABP2	-0.925	0.017745	0.0272	Cellular retinoic acid-binding protein 2
RPS15	-0.932	0.0263129	0.0389	40S ribosomal protein S15
VCL	-0.939	0.0213652	0.0311	Vinculin
PFDN6	-0.946	0.0105199	0.0144	Prefoldin subunit 6
NEDD8	-0.946	0.0371984	0.0564	NEDD8
RTCA	-0.956	0.0109055	0.015	RNA 3-terminal phosphate cyclase
APRT	-0.958	0.0368459	0.0559	Adenine phosphoribosyltransferase
ABHD11	-0.96	0.0261472	0.0386	Alpha/beta hydrolase domain-containing protein 11
SPRR1A	-0.965	0.0374412	0.0567	Cornifin-A
PIN4	-0.967	0.0185491	0.0282	Peptidyl-prolyl cis-trans isomerase NIMA-interacting 4
NUP50	-0.983	0.0279651	0.0417	Nuclear pore complex protein Nup50
INPP1	-0.988	0.0236852	0.0339	Inositol polyphosphate 1-phosphatase
PMPCA	-0.988	0.0339919	0.0518	Mitochondrial-processing peptidase subunit alpha
EIF3B	-1	0.0231665	0.0331	Eukaryotic translation initiation factor 3 subunit B
NAE1	-1	0.0220872	0.0317	NEDD8-activating enzyme E1 regulatory subunit
BTF3	-1.03	0.0152116	0.0236	Transcription factor BTF3
STXBP2	-1.03	0.0286415	0.0429	Syntaxin-binding protein 2
SNRPD2	-1.07	0.0448361	0.0651	Small nuclear ribonucleoprotein Sm D2
PSME2	-1.08	0.0107302	0.0148	Proteasome activator complex subunit 2
RPL9	-1.09	0.00560282	0.00477	60S ribosomal protein L9
ACSF3	-1.1	0.035208	0.0536	Acyl-CoA synthetase family member 3, mitochondrial
CPD	-1.12	0.0458208	0.066	Carboxypeptidase D
MT-CO2	-1.12	0.0449693	0.0652	Cytochrome c oxidase subunit 2
GRIPAP1	-1.14	0.0101082	0.0137	GRIP1-associated protein 1
CAPN5	-1.17	0.0183586	0.028	Calpain-5
EHD2	-1.22	0.015075	0.0234	EH domain-containing protein 2
CSRP1	-1.33	0.0317725	0.0482	Cysteine and glycine-rich protein 1
MYO5B	-1.42	0.0178702	0.0274	Unconventional myosin-Vb
SLC25A6	-1.62	0.00326326	0.00219	ADP/ATP translocase 3;ADP/ATP translocase 3, N-terminally processed
ME2	-1.95	0.00530817	0.00451	NAD-dependent malic enzyme, mitochondrial
ACAA1	-1.97	0.0201022	0.0299	3-ketoacyl-CoA thiolase, peroxisomal
GSTO1	-2.04	0.0222813	0.0319	Glutathione S-transferase omega-1

## Sheet: NonCF_HH.vs.NonCF_HN_PAIR 3
NonCF_HH.vs.NonCF_HN [PAIR 3]
Protein	logFC	Pvalue	P.adj	protein_name
NDRG1	4.73	6.03046e-09	5.59e-13	Protein NDRG1
DSP	3.8	0.000101176	0.00845	Desmoplakin
SLC2A1	3.4	1.88937e-07	1.53e-09	Solute carrier family 2, facilitated glucose transporter member 1
TGM2	3.21	4.33134e-05	0.0023	Protein-glutamine gamma-glutamyltransferase 2
MUC5B	2.7	0.00576558	0.376	Mucin-5B
VIM	2.69	0.00480609	0.333	Vimentin
P4HA1	2.68	0.000757121	0.075	Prolyl 4-hydroxylase subunit alpha-1
MT1X	2.6	0.000926008	0.0903	Metallothionein-1X
TFF3	2.44	1.88376e-06	2.79e-06	Trefoil factor 3
LGALS1	2.31	3.97218e-05	0.00205	Galectin-1
HIST1H2AC	2.22	2.88648e-05	0.00125	Histone H2A type 1-C;Histone H2A type 3;Histone H2A type 1-B/E
APOL2	2.09	1.38585e-05	0.000347	Apolipoprotein L2
DPYD	1.99	0.000268374	0.0255	Dihydropyrimidine dehydrogenase [NADP(+)]
SLC26A2	1.75	0.000114138	0.00982	Sulfate transporter
FHL2	1.7	0.00196522	0.157	Four and a half LIM domains protein 2
H3F3A	1.7	0.00206264	0.162	Histone H3.3
MT2A	1.69	0.00122469	0.114	Metallothionein-2
DSG2	1.67	0.00015986	0.015	Desmoglein-2
ITGAV	1.58	0.0133835	0.58	Integrin alpha-V;Integrin alpha-V heavy chain;Integrin alpha-V light chain
NUCB1	1.58	0.00342984	0.257	Nucleobindin-1
PFKP	1.54	0.000389741	0.0385	ATP-dependent 6-phosphofructokinase, platelet type
CNN3	1.53	0.0252671	0.71	Calponin-3
TMED9	1.53	0.0103653	0.52	Transmembrane emp24 domain-containing protein 9
POF1B	1.5	0.00052109	0.0522	Protein POF1B
HIST1H1D	1.49	0.00227935	0.179	Histone H1.3
CAV1	1.46	0.000627705	0.0619	Caveolin-1
HMGN4	1.45	0.0131723	0.576	High mobility group nucleosome-binding domain-containing protein 4
KRT19	1.43	0.00416257	0.299	Keratin, type I cytoskeletal 19
FSCN1	1.42	0.000273001	0.0259	Fascin
LAD1	1.4	0.0173445	0.637	Ladinin-1
BSG	1.38	0.000169162	0.016	Basigin
FRMD8	1.37	0.0215969	0.681	FERM domain-containing protein 8
H2AFV	1.37	0.00108145	0.103	Histone H2A.V;Histone H2A.Z
H1F0	1.34	0.00143126	0.127	Histone H1.0;Histone H1.0, N-terminally processed
ARHGDIB	1.31	0.00954015	0.5	Rho GDP-dissociation inhibitor 2
TFCP2	1.31	0.00329311	0.248	Alpha-globin transcription factor CP2
MIF	1.29	0.00146996	0.13	Macrophage migration inhibitory factor
SLC16A1	1.28	0.00537258	0.359	Monocarboxylate transporter 1
QIL1	1.27	0.0372212	0.773	Protein QIL1
ITGA6	1.26	0.0111848	0.538	Integrin alpha-6;Integrin alpha-6 heavy chain;Integrin alpha-6 light chain;Processed integrin alpha-6
FLNA	1.24	0.0285121	0.731	Filamin-A
GALNT7	1.22	0.0189345	0.655	N-acetylgalactosaminyltransferase 7
ERO1L	1.21	0.000620553	0.0613	ERO1-like protein alpha
RAVER1	1.21	0.0298246	0.739	Ribonucleoprotein PTB-binding 1
LDHA	1.19	0.019312	0.659	L-lactate dehydrogenase A chain
LGALS3BP	1.18	0.00436201	0.31	Galectin-3-binding protein
CST3	1.14	0.0131785	0.576	Cystatin-C
ITGB6	1.14	0.0192349	0.658	Integrin beta-6
CD44	1.13	0.00524419	0.353	CD44 antigen
FAM49B	1.13	0.00864336	0.476	Protein FAM49B
PMM2	1.12	0.00687726	0.419	Phosphomannomutase 2
LASP1	1.11	0.0474639	0.806	LIM and SH3 domain protein 1
MSN	1.11	0.00937534	0.496	Moesin
CISD1	1.09	0.0133712	0.58	CDGSH iron-sulfur domain-containing protein 1
ASPH	1.08	0.00175453	0.145	Aspartyl/asparaginyl beta-hydroxylase
RRBP1	1.07	0.0227623	0.691	Ribosome-binding protein 1
ST14	1.07	0.00449072	0.317	Suppressor of tumorigenicity 14 protein
ADK	1.06	0.0268767	0.721	Adenosine kinase
TPM4	1.06	0.00352966	0.263	Tropomyosin alpha-4 chain
TXNDC5	1.06	0.00465628	0.325	Thioredoxin domain-containing protein 5
ARHGAP1	1.05	0.00478596	0.332	Rho GTPase-activating protein 1
COG5	1.05	0.0336397	0.758	Conserved oligomeric Golgi complex subunit 5
PKP1	1.05	0.0234992	0.697	Plakophilin-1
PYGL	1.05	0.0133407	0.579	Glycogen phosphorylase, liver form
RPL18A	1.05	0.0106662	0.527	60S ribosomal protein L18a
RBM47	1.03	0.0321201	0.751	RNA-binding protein 47
ASS1	1.02	0.0239555	0.7	Argininosuccinate synthase
CELSR1	1.01	0.0296829	0.738	Cadherin EGF LAG seven-pass G-type receptor 1
ARFGAP2	0.996	0.0081873	0.462	ADP-ribosylation factor GTPase-activating protein 2
GYS1	0.996	0.00701158	0.424	Glycogen [starch] synthase, muscle
ALDH1A3	0.993	0.00613952	0.391	Aldehyde dehydrogenase family 1 member A3
UTRN	0.99	0.0349449	0.764	Utrophin
RAB21	0.986	0.0134445	0.581	Ras-related protein Rab-21
RPL35	0.984	0.0348892	0.763	60S ribosomal protein L35
PDXDC1	0.978	0.00850051	0.472	Pyridoxal-dependent decarboxylase domain-containing protein 1
ZC3H14	0.962	0.0301124	0.74	Zinc finger CCCH domain-containing protein 14
SERPINH1	0.951	0.0208096	0.674	Serpin H1
CORO1C	0.927	0.041365	0.788	Coronin-1C
GORASP2	0.927	0.0112545	0.54	Golgi reassembly-stacking protein 2
MYDGF	0.924	0.00506626	0.345	Myeloid-derived growth factor
HK2	0.913	0.0209832	0.675	Hexokinase-2
BAG1	0.911	0.0261036	0.716	BAG family molecular chaperone regulator 1
RPS18	0.909	0.0196984	0.663	40S ribosomal protein S18
ANXA2	0.908	0.0151853	0.608	Annexin A2;Putative annexin A2-like protein
ALDOA	0.907	0.00799889	0.457	Fructose-bisphosphate aldolase A
PPP1R13L	0.892	0.0122436	0.559	RelA-associated inhibitor
HIST1H1E	0.876	0.0106634	0.527	Histone H1.4
PTK2	0.876	0.0430773	0.794	Focal adhesion kinase 1
NOP58	0.875	0.00350105	0.261	Nucleolar protein 58
SPINT1	0.869	0.0438266	0.796	Kunitz-type protease inhibitor 1
SLC25A3	0.868	0.00602806	0.387	Phosphate carrier protein, mitochondrial
LMNB2	0.86	0.0342275	0.761	Lamin-B2
ALDH6A1	0.858	0.0416977	0.789	Methylmalonate-semialdehyde dehydrogenase [acylating], mitochondrial
ROCK2	0.85	0.00881864	0.481	Rho-associated protein kinase 2
ANXA5	0.846	0.0214284	0.679	Annexin A5
GNPDA1	0.845	0.0177354	0.641	Glucosamine-6-phosphate isomerase 1
FLNB	0.837	0.00590958	0.382	Filamin-B
PCK2	0.825	0.0484118	0.809	Phosphoenolpyruvate carboxykinase [GTP], mitochondrial
CDKN2A	0.813	0.0224739	0.689	Cyclin-dependent kinase inhibitor 2A;Cyclin-dependent kinase 4 inhibitor B
NSUN2	0.792	0.0351202	0.764	tRNA (cytosine(34)-C(5))-methyltransferase
TPD52L2	0.768	0.0133904	0.58	Tumor protein D54
PKP3	0.767	0.0119569	0.554	Plakophilin-3
CXCL1	0.746	0.0455187	0.801	Growth-regulated alpha protein;GRO-alpha(4-73);GRO-alpha(5-73);GRO-alpha(6-73)
RHOG	0.728	0.034891	0.763	Rho-related GTP-binding protein RhoG
PREB	0.726	0.0480149	0.808	Prolactin regulatory element-binding protein
ACSF2	0.682	0.0291067	0.735	Acyl-CoA synthetase family member 2, mitochondrial
BID	0.666	0.0451977	0.8	BH3-interacting domain death agonist;BH3-interacting domain death agonist p15;BH3-interacting domain death agonist p13;BH3-interacting domain death agonist p11
PGAM1	0.666	0.0404335	0.785	Phosphoglycerate mutase 1;Probable phosphoglycerate mutase 4
PGK1	0.666	0.0187886	0.653	Phosphoglycerate kinase 1
STAU1	0.648	0.0372565	0.773	Double-stranded RNA-binding protein Staufen homolog 1
LMNA	0.634	0.0384723	0.778	Prelamin-A/C;Lamin-A/C
PFKL	0.605	0.0365423	0.77	ATP-dependent 6-phosphofructokinase, liver type
RPL28	0.577	0.0391362	0.78	60S ribosomal protein L28
TMED10	0.53	0.0484441	0.809	Transmembrane emp24 domain-containing protein 10
EEF1G	-0.575	0.0310706	0.745	Elongation factor 1-gamma
RANBP1	-0.602	0.0332113	0.756	Ran-specific GTPase-activating protein
ACAT1	-0.612	0.0206095	0.672	Acetyl-CoA acetyltransferase, mitochondrial
RUVBL2	-0.639	0.0325656	0.753	RuvB-like 2
LRBA	-0.648	0.0353838	0.766	Lipopolysaccharide-responsive and beige-like anchor protein
ABLIM1	-0.654	0.0466279	0.804	Actin-binding LIM protein 1
PSMA5	-0.66	0.0388477	0.779	Proteasome subunit alpha type-5
NARS	-0.663	0.0350348	0.764	Asparagine--tRNA ligase, cytoplasmic
RUVBL1	-0.678	0.0457634	0.802	RuvB-like 1
CD9	-0.698	0.0423108	0.791	CD9 antigen
MARS	-0.701	0.0383052	0.777	Methionine--tRNA ligase, cytoplasmic
NME7	-0.715	0.0468085	0.804	Nucleoside diphosphate kinase 7
RARS	-0.715	0.0187682	0.653	Arginine--tRNA ligase, cytoplasmic
SCCPDH	-0.722	0.0398741	0.783	Saccharopine dehydrogenase-like oxidoreductase
ATP5C1	-0.737	0.0449783	0.799	ATP synthase subunit gamma, mitochondrial
DYNLL1	-0.746	0.0347346	0.763	Dynein light chain 1, cytoplasmic
CIB1	-0.75	0.0218609	0.683	Calcium and integrin-binding protein 1
UBTF	-0.762	0.0405007	0.785	Nucleolar transcription factor 1
CAMK2D	-0.763	0.0344296	0.761	Calcium/calmodulin-dependent protein kinase type II subunit delta
WARS	-0.774	0.038226	0.777	Tryptophan--tRNA ligase, cytoplasmic;T1-TrpRS;T2-TrpRS
ILF2	-0.783	0.0152662	0.609	Interleukin enhancer-binding factor 2
NME9	-0.783	0.0470483	0.805	Thioredoxin domain-containing protein 6
C14orf159	-0.787	0.0233905	0.696	UPF0317 protein C14orf159, mitochondrial
ADSS	-0.788	0.037404	0.774	Adenylosuccinate synthetase isozyme 2
ERICH5	-0.79	0.0456125	0.801	Glutamate-rich protein 5
MSI2	-0.79	0.0300372	0.74	RNA-binding protein Musashi homolog 2
SUGT1	-0.806	0.0204114	0.67	Suppressor of G2 allele of SKP1 homolog
DDX42	-0.814	0.0288311	0.733	ATP-dependent RNA helicase DDX42
COX6A1	-0.817	0.036992	0.772	Cytochrome c oxidase subunit 6A1, mitochondrial
DHRS7B	-0.822	0.0333849	0.757	Dehydrogenase/reductase SDR family member 7B
SCPEP1	-0.822	0.0278827	0.727	Retinoid-inducible serine carboxypeptidase
AK1	-0.823	0.0336498	0.758	Adenylate kinase isoenzyme 1
FDXR	-0.831	0.0134147	0.581	NADPH:adrenodoxin oxidoreductase, mitochondrial
A2ML1	-0.835	0.0145948	0.6	Alpha-2-macroglobulin-like protein 1
CPT1A	-0.84	0.047035	0.805	Carnitine O-palmitoyltransferase 1, liver isoform
PDZD11	-0.846	0.0361905	0.769	PDZ domain-containing protein 11
STARD10	-0.846	0.0280476	0.728	PCTP-like protein
SCP2	-0.847	0.00686792	0.419	Non-specific lipid-transfer protein
AKR1B1	-0.848	0.0422529	0.791	Aldose reductase
STRBP	-0.857	0.0208827	0.674	Spermatid perinuclear RNA-binding protein
ADD1	-0.86	0.0209675	0.675	Alpha-adducin
MLLT4	-0.861	0.0199756	0.666	Afadin
PRPS2	-0.861	0.0254807	0.712	Ribose-phosphate pyrophosphokinase 2
EPHX2	-0.877	0.027925	0.728	Bifunctional epoxide hydrolase 2;Cytosolic epoxide hydrolase 2;Lipid-phosphate phosphatase
MTCH2	-0.879	0.00607851	0.389	Mitochondrial carrier homolog 2
KIF13B	-0.883	0.0205734	0.672	Kinesin-like protein KIF13B
CYFIP1	-0.884	0.0154615	0.612	Cytoplasmic FMR1-interacting protein 1
IDE	-0.885	0.0144523	0.597	Insulin-degrading enzyme
PSMC1	-0.885	0.0161567	0.622	26S protease regulatory subunit 4
GRIPAP1	-0.887	0.0367463	0.771	GRIP1-associated protein 1
HYPK	-0.887	0.00810412	0.46	Huntingtin-interacting protein K
PSME1	-0.888	0.00448	0.316	Proteasome activator complex subunit 1
HIBADH	-0.892	0.00945041	0.498	3-hydroxyisobutyrate dehydrogenase, mitochondrial
ARMC4	-0.893	0.0104751	0.523	Armadillo repeat-containing protein 4
BASP1	-0.9	0.0456352	0.801	Brain acid soluble protein 1
DCDC2B	-0.906	0.0102543	0.517	Doublecortin domain-containing protein 2B
NAPRT	-0.907	0.0473046	0.806	Nicotinate phosphoribosyltransferase
BPNT1	-0.923	0.0175044	0.639	3(2),5-bisphosphate nucleotidase 1
ZNF638	-0.924	0.0256179	0.713	Zinc finger protein 638
NUDC	-0.927	0.047367	0.806	Nuclear migration protein nudC
DHX15	-0.929	0.0101078	0.514	Pre-mRNA-splicing factor ATP-dependent RNA helicase DHX15
SCLY	-0.931	0.0277319	0.726	Selenocysteine lyase
ARPC2	-0.939	0.0255147	0.712	Actin-related protein 2/3 complex subunit 2
TP53BP1	-0.94	0.0107552	0.529	Tumor suppressor p53-binding protein 1
EIF2B2	-0.945	0.0433477	0.794	Translation initiation factor eIF-2B subunit beta
PSMD11	-0.945	0.0164413	0.625	26S proteasome non-ATPase regulatory subunit 11
AHSA1	-0.948	0.0216106	0.681	Activator of 90 kDa heat shock protein ATPase homolog 1
PTRHD1	-0.948	0.0147007	0.601	Putative peptidyl-tRNA hydrolase PTRHD1
XRCC1	-0.95	0.0105989	0.525	DNA repair protein XRCC1
CYB5B	-0.953	0.0181626	0.646	Cytochrome b5 type B
SNX18	-0.957	0.0102424	0.517	Sorting nexin-18
PABPC4	-0.959	0.0281153	0.729	Polyadenylate-binding protein 4
ARFIP2	-0.962	0.0223214	0.687	Arfaptin-2
B2M	-0.967	0.0109417	0.533	Beta-2-microglobulin;Beta-2-microglobulin form pI 5.3
QARS	-0.969	0.00389143	0.284	Glutamine--tRNA ligase
GPX4	-0.972	0.00757512	0.443	Phospholipid hydroperoxide glutathione peroxidase, mitochondrial
VAPA	-0.977	0.01343	0.581	Vesicle-associated membrane protein-associated protein A
BAIAP2	-0.984	0.0317092	0.749	Brain-specific angiogenesis inhibitor 1-associated protein 2
LLGL2	-0.987	0.0062909	0.397	Lethal(2) giant larvae protein homolog 2
NFX1	-0.987	0.0334967	0.757	Transcriptional repressor NF-X1
OSCP1	-0.993	0.0152836	0.61	Protein OSCP1
DNAAF3	-1	0.0478766	0.807	Dynein assembly factor 3, axonemal
EIF3F	-1	0.0218679	0.683	Eukaryotic translation initiation factor 3 subunit F
HAGH	-1	0.00628272	0.397	Hydroxyacylglutathione hydrolase, mitochondrial
ATP5F1	-1.01	0.0366239	0.771	ATP synthase F(0) complex subunit B1, mitochondrial
MX1	-1.01	0.0223765	0.688	Interferon-induced GTP-binding protein Mx1;Interferon-induced GTP-binding protein Mx1, N-terminally processed
UFM1	-1.01	0.00819809	0.463	Ubiquitin-fold modifier 1
COPS6	-1.02	0.00703323	0.425	COP9 signalosome complex subunit 6
MATR3	-1.02	0.0142181	0.594	Matrin-3
COG3	-1.03	0.0203341	0.669	Conserved oligomeric Golgi complex subunit 3
EFHC1	-1.03	0.0140605	0.591	EF-hand domain-containing protein 1
NT5C	-1.03	0.0240641	0.701	5(3)-deoxyribonucleotidase, cytosolic type
SPATA18	-1.03	0.00534924	0.358	Mitochondria-eating protein
CCDC88C	-1.04	0.0182023	0.647	Protein Daple
RTN4	-1.04	0.0319367	0.75	Reticulon-4
DNAJA4	-1.05	0.0235359	0.697	DnaJ homolog subfamily A member 4
GCLC	-1.05	0.0410684	0.787	Glutamate--cysteine ligase catalytic subunit
THYN1	-1.05	0.0132123	0.577	Thymocyte nuclear protein 1
ABHD10	-1.06	0.0102773	0.518	Mycophenolic acid acyl-glucuronide esterase, mitochondrial
ARF6	-1.06	0.0173838	0.637	ADP-ribosylation factor 6
ODF3B	-1.08	0.00843125	0.47	Outer dense fiber protein 3B
ARL3	-1.09	0.00360591	0.268	ADP-ribosylation factor-like protein 3
SLC44A4	-1.09	0.00712851	0.428	Choline transporter-like protein 4
DDAH1	-1.1	0.0118706	0.552	N(G),N(G)-dimethylarginine dimethylaminohydrolase 1
MYCBP	-1.1	0.0159462	0.619	C-Myc-binding protein
SAMM50	-1.1	0.0400348	0.784	Sorting and assembly machinery component 50 homolog
TIPRL	-1.1	0.0176082	0.64	TIP41-like protein
HSD17B12	-1.12	0.012425	0.563	Very-long-chain 3-oxoacyl-CoA reductase
TPP2	-1.12	0.0386161	0.778	Tripeptidyl-peptidase 2
CHORDC1	-1.13	0.00151269	0.132	Cysteine and histidine-rich domain-containing protein 1
S100A11	-1.13	0.0457197	0.801	Protein S100-A11;Protein S100-A11, N-terminally processed
C11orf54	-1.14	0.00787439	0.453	Ester hydrolase C11orf54
EIF3M	-1.14	0.00747654	0.44	Eukaryotic translation initiation factor 3 subunit M
OLA1	-1.14	0.0298653	0.739	Obg-like ATPase 1
PTGES3	-1.14	0.023665	0.698	Prostaglandin E synthase 3
RSPH1	-1.14	0.00197784	0.158	Radial spoke head 1 homolog
SMARCC2	-1.14	0.00936231	0.495	SWI/SNF complex subunit SMARCC2
CCDC181	-1.15	0.00524203	0.353	Coiled-coil domain-containing protein 181
PRMT1	-1.15	0.0250594	0.709	Protein arginine N-methyltransferase 1
MIPEP	-1.16	0.0168918	0.631	Mitochondrial intermediate peptidase
CLU	-1.17	0.0119822	0.554	Clusterin;Clusterin beta chain;Clusterin alpha chain
DNAJB13	-1.17	0.00377468	0.278	DnaJ homolog subfamily B member 13
AGR3	-1.18	0.00169909	0.142	Anterior gradient protein 3 homolog
FBP1	-1.18	0.0165734	0.627	Fructose-1,6-bisphosphatase 1
GTF2I	-1.19	0.0189715	0.655	General transcription factor II-I
MB	-1.19	0.0350277	0.764	Myoglobin
TTLL12	-1.2	0.00380584	0.279	Tubulin--tyrosine ligase-like protein 12
CPT2	-1.21	0.00666508	0.412	Carnitine O-palmitoyltransferase 2, mitochondrial
IMPDH2	-1.21	0.0124529	0.563	Inosine-5-monophosphate dehydrogenase 2
ACAT2	-1.22	0.0019255	0.155	Acetyl-CoA acetyltransferase, cytosolic
CTBP1	-1.22	0.0198517	0.664	C-terminal-binding protein 1
RBM3	-1.22	0.00179478	0.147	RNA-binding protein 3
CYC1	-1.23	0.00628522	0.397	Cytochrome c1, heme protein, mitochondrial
PTRH2	-1.24	0.00393508	0.287	Peptidyl-tRNA hydrolase 2, mitochondrial
AK7	-1.25	0.00464242	0.324	Adenylate kinase 7
COX5A	-1.25	0.0150216	0.606	Cytochrome c oxidase subunit 5A, mitochondrial
GBP6	-1.25	0.00754392	0.442	Guanylate-binding protein 6
HADH	-1.25	0.035715	0.767	Hydroxyacyl-coenzyme A dehydrogenase, mitochondrial
PEBP1	-1.25	0.00636083	0.4	Phosphatidylethanolamine-binding protein 1;Hippocampal cholinergic neurostimulating peptide
HDAC1	-1.26	0.00609505	0.39	Histone deacetylase 1
SPAG1	-1.27	0.00557669	0.368	Sperm-associated antigen 1
UGDH	-1.27	0.00127848	0.117	UDP-glucose 6-dehydrogenase
HIP1R	-1.28	0.000980579	0.0949	Huntingtin-interacting protein 1-related protein
XPNPEP3	-1.29	0.00665225	0.411	Probable Xaa-Pro aminopeptidase 3
DYNLT1	-1.3	0.00228089	0.179	Dynein light chain Tctex-type 1
RTCA	-1.3	0.00138519	0.124	RNA 3-terminal phosphate cyclase
SMPD2	-1.3	0.00489856	0.337	Sphingomyelin phosphodiesterase 2
G6PD	-1.31	0.0188617	0.654	Glucose-6-phosphate 1-dehydrogenase
IFT74	-1.31	0.00759819	0.444	Intraflagellar transport protein 74 homolog
NUCB2	-1.31	0.000810172	0.08	Nucleobindin-2;Nesfatin-1
G3BP1	-1.32	0.00374538	0.276	Ras GTPase-activating protein-binding protein 1
PIR	-1.34	0.00174476	0.145	Pirin
SPTBN2	-1.35	0.00127297	0.117	Spectrin beta chain, non-erythrocytic 2
MAP2K2	-1.36	0.00334683	0.252	Dual specificity mitogen-activated protein kinase kinase 2
DNAI1	-1.37	0.00181183	0.148	Dynein intermediate chain 1, axonemal
FAM98B	-1.41	0.0158899	0.618	Protein FAM98B
FMO3	-1.41	0.00050586	0.0507	Dimethylaniline monooxygenase [N-oxide-forming] 3
APRT	-1.43	0.0040757	0.295	Adenine phosphoribosyltransferase
CROCC	-1.44	0.00690711	0.42	Rootletin
MCTS1	-1.45	0.00302816	0.231	Malignant T-cell-amplified sequence 1
IFT46	-1.46	0.00154721	0.134	Intraflagellar transport protein 46 homolog
EPHX1	-1.48	0.00278371	0.215	Epoxide hydrolase 1
CFAP20	-1.49	0.00383317	0.281	Cilia- and flagella-associated protein 20
DNPH1	-1.51	0.000108607	0.00924	2-deoxynucleoside 5-phosphate N-hydrolase 1
SLC25A6	-1.51	0.00520351	0.351	ADP/ATP translocase 3;ADP/ATP translocase 3, N-terminally processed
RSPH4A	-1.52	0.00924945	0.492	Radial spoke head protein 4 homolog A
C1orf87	-1.54	0.00107201	0.102	Uncharacterized protein C1orf87
ECHDC1	-1.55	0.00202907	0.16	Ethylmalonyl-CoA decarboxylase
DNAL1	-1.56	0.00177515	0.146	Dynein light chain 1, axonemal
GLIPR2	-1.57	0.0108447	0.531	Golgi-associated plant pathogenesis-related protein 1
MAP1A	-1.57	0.0126777	0.568	Microtubule-associated protein 1A;MAP1A heavy chain;MAP1 light chain LC2
ALDH16A1	-1.59	0.000452654	0.0453	Aldehyde dehydrogenase family 16 member A1
ARHGAP18	-1.59	0.000358711	0.035	Rho GTPase-activating protein 18
CHMP5	-1.59	0.015229	0.609	Charged multivesicular body protein 5
DHX9	-1.61	0.00611164	0.39	ATP-dependent RNA helicase A
PPOX	-1.61	0.00207774	0.163	Protoporphyrinogen oxidase
XPO1	-1.62	0.0159303	0.619	Exportin-1
ARF1	-1.63	0.000414052	0.0412	ADP-ribosylation factor 1;ADP-ribosylation factor 3
CYCS	-1.63	0.00228844	0.179	Cytochrome c
SAMHD1	-1.63	0.00109833	0.104	Deoxynucleoside triphosphate triphosphohydrolase SAMHD1
FBXW9	-1.65	0.00105519	0.101	F-box/WD repeat-containing protein 9
PCM1	-1.69	0.000202685	0.0196	Pericentriolar material 1 protein
ANXA8L2	-1.7	0.00502658	0.343	Annexin A8-like protein 2
DNAH11	-1.7	0.000804392	0.0795	Dynein heavy chain 11, axonemal
MT-CO1	-1.71	0.00584308	0.379	Cytochrome c oxidase subunit 1
ALDH3B1	-1.73	0.0102356	0.517	Aldehyde dehydrogenase family 3 member B1
PLEKHA5	-1.73	0.00163884	0.139	Pleckstrin homology domain-containing family A member 5
SPRR1A	-1.76	0.000941446	0.0917	Cornifin-A
PSME2	-1.8	0.000240076	0.0231	Proteasome activator complex subunit 2
MT-CO2	-1.81	0.00322348	0.244	Cytochrome c oxidase subunit 2
IFT81	-1.85	0.0001268	0.0111	Intraflagellar transport protein 81 homolog
C14orf166	-1.89	0.0172346	0.635	UPF0568 protein C14orf166
METTL7A	-1.9	0.000587119	0.0584	Methyltransferase-like protein 7A
IFT172	-1.94	0.000558677	0.0558	Intraflagellar transport protein 172 homolog
SLC27A2	-2.04	0.0002275	0.022	Very long-chain acyl-CoA synthetase
ABHD11	-2.08	0.000100607	0.00839	Alpha/beta hydrolase domain-containing protein 11
TTC25	-2.09	1.99189e-05	0.000632	Tetratricopeptide repeat protein 25
ALDH3A1	-2.11	0.000256613	0.0246	Aldehyde dehydrogenase, dimeric NADP-preferring
CES1	-2.13	0.0106297	0.526	Liver carboxylesterase 1
IPO4	-2.14	0.00161715	0.138	Importin-4
ALDH1A1	-2.2	4.02021e-05	0.00208	Retinal dehydrogenase 1
CTSH	-2.31	8.75867e-07	3.64e-07	Pro-cathepsin H;Cathepsin H mini chain;Cathepsin H;Cathepsin H heavy chain;Cathepsin H light chain
RSPH9	-2.35	1.82578e-05	0.000556	Radial spoke head protein 9 homolog
APPL2	-2.37	0.000851298	0.0838	DCC-interacting protein 13-beta
CCDC151	-2.39	0.000118025	0.0102	Coiled-coil domain-containing protein 151
NQO1	-2.55	1.03531e-05	0.000199	NAD(P)H dehydrogenase [quinone] 1
KIF21A	-2.67	0.00136266	0.123	Kinesin-like protein KIF21A
ADH7	-2.89	0.000270828	0.0257	Alcohol dehydrogenase class 4 mu/sigma chain
GSTA1	-2.92	0.000294538	0.0275	Glutathione S-transferase A1;Glutathione S-transferase A1, N-terminally processed
DYNC2H1	-2.93	0.000222835	0.0216	Cytoplasmic dynein 2 heavy chain 1
ERICH3	-3.05	0.000496567	0.0498	Glutamate-rich protein 3
DNAH9	-3.08	1.97242e-06	3.03e-06	Dynein heavy chain 9, axonemal
DNAH5	-3.11	5.03676e-05	0.00288	Dynein heavy chain 5, axonemal
SPRR3	-4.32	0.000293489	0.0275	Small proline-rich protein 3
ALDH3A2	-5.15	6.43507e-06	7.05e-05	Fatty aldehyde dehydrogenase

## Sheet: NonCF_NH.vs.NonCF_NN_PAIR 4
NonCF_NH.vs.NonCF_NN [PAIR 4]
Protein	logFC	Pvalue	P.adj	protein_name
NDRG1	5.65	6.19976e-10	1	Protein NDRG1
MT1X	3.59	5.05628e-05	1	Metallothionein-1X
MUC5B	3.47	0.000927655	1	Mucin-5B
VIM	3.26	0.00120333	1	Vimentin
SLC2A1	3.22	3.61774e-07	1	Solute carrier family 2, facilitated glucose transporter member 1
P4HA1	3.06	0.000240494	1	Prolyl 4-hydroxylase subunit alpha-1
TGM2	3	8.37987e-05	1	Protein-glutamine gamma-glutamyltransferase 2
LGALS1	2.89	3.51603e-06	1	Galectin-1
LAMC2	2.64	0.0421025	1	Laminin subunit gamma-2
TFF3	2.58	9.92249e-07	1	Trefoil factor 3
DSP	2.51	0.00320808	1	Desmoplakin
APOL2	2.32	4.40447e-06	1	Apolipoprotein L2
FHL2	2.23	0.000204355	1	Four and a half LIM domains protein 2
TPM1	2.15	0.00556411	1	Tropomyosin alpha-1 chain
ACAA1	2.14	0.0130733	1	3-ketoacyl-CoA thiolase, peroxisomal
PHF21A	2.12	0.00893927	1	PHD finger protein 21A
ITGB6	2.11	0.000235152	1	Integrin beta-6
BZW1	2.1	0.000424563	1	Basic leucine zipper and W2 domain-containing protein 1
FRMD8	2.09	0.00147921	1	FERM domain-containing protein 8
PMM2	2.09	3.9353e-05	1	Phosphomannomutase 2
HMGN4	2.07	0.00120423	1	High mobility group nucleosome-binding domain-containing protein 4
ACTB	2.03	0.0140658	1	Actin, cytoplasmic 1;Actin, cytoplasmic 1, N-terminally processed
CNN3	1.98	0.00607013	1	Calponin-3
ITGAV	1.98	0.00320022	1	Integrin alpha-V;Integrin alpha-V heavy chain;Integrin alpha-V light chain
SLC16A1	1.97	0.000176618	1	Monocarboxylate transporter 1
CELSR1	1.96	0.00034195	1	Cadherin EGF LAG seven-pass G-type receptor 1
TF	1.96	0.00793996	1	Serotransferrin
DPYD	1.95	0.000320788	1	Dihydropyrimidine dehydrogenase [NADP(+)]
CAV1	1.92	4.9711e-05	1	Caveolin-1
PFDN5	1.91	0.00182254	1	Prefoldin subunit 5
ZYX	1.88	0.0175462	1	Zyxin
EPHB2	1.87	0.00615333	1	Ephrin type-B receptor 2
MED1	1.85	0.0163604	1	Mediator of RNA polymerase II transcription subunit 1
PTDSS1	1.85	0.00226613	1	Phosphatidylserine synthase 1
GARS	1.84	0.0104348	1	Glycine--tRNA ligase
FLNA	1.83	0.00294698	1	Filamin-A
ING1	1.83	0.0101886	1	Inhibitor of growth protein 1
NUBP2	1.81	0.00133133	1	Cytosolic Fe-S cluster assembly factor NUBP2
ZC3H14	1.81	0.000478792	1	Zinc finger CCCH domain-containing protein 14
TFCP2	1.8	0.000257856	1	Alpha-globin transcription factor CP2
CEP170	1.76	0.0101963	1	Centrosomal protein of 170 kDa
FAM210B	1.76	0.00496217	1	Protein FAM210B
HK2	1.75	0.000211691	1	Hexokinase-2
TMED9	1.75	0.0044374	1	Transmembrane emp24 domain-containing protein 9
AGPAT1	1.74	0.0117127	1	1-acyl-sn-glycerol-3-phosphate acyltransferase alpha
DNMBP	1.74	0.0107948	1	Dynamin-binding protein
ISOC1	1.74	0.00528706	1	Isochorismatase domain-containing protein 1
APMAP	1.73	0.000438483	1	Adipocyte plasma membrane-associated protein
RRBP1	1.73	0.0010413	1	Ribosome-binding protein 1
H3F3A	1.69	0.00213062	1	Histone H3.3
AKAP8	1.67	0.00975256	1	A-kinase anchor protein 8
GPD1L	1.67	0.00184294	1	Glycerol-3-phosphate dehydrogenase 1-like protein
ITGA6	1.67	0.00171624	1	Integrin alpha-6;Integrin alpha-6 heavy chain;Integrin alpha-6 light chain;Processed integrin alpha-6
NUP85	1.67	0.00307842	1	Nuclear pore complex protein Nup85
ZNF20	1.67	0.0410568	1	Zinc finger protein 20
CFAP70	1.66	0.00805727	1	Cilia- and flagella-associated protein 70
DVL3	1.66	0.00991982	1	Segment polarity protein dishevelled homolog DVL-3
GPR108	1.66	0.0112025	1	Protein GPR108
SCOC	1.66	0.00245597	1	Short coiled-coil protein
AGRN	1.65	0.00133954	1	Agrin;Agrin N-terminal 110 kDa subunit;Agrin C-terminal 110 kDa subunit;Agrin C-terminal 90 kDa fragment;Agrin C-terminal 22 kDa fragment
ASL	1.65	0.0077203	1	Argininosuccinate lyase
POLR2D	1.65	0.00669413	1	DNA-directed RNA polymerase II subunit RPB4
STAT2	1.64	0.00137334	1	Signal transducer and activator of transcription 2
LGALS3BP	1.63	0.00035209	1	Galectin-3-binding protein
STK39	1.62	0.0291356	1	STE20/SPS1-related proline-alanine-rich protein kinase
NUCB1	1.61	0.00303968	1	Nucleobindin-1
MIF	1.6	0.000249007	1	Macrophage migration inhibitory factor
SUN2	1.6	0.00182373	1	SUN domain-containing protein 2
GFM1	1.58	0.00144706	1	Elongation factor G, mitochondrial
SEC22B	1.58	0.012145	1	Vesicle-trafficking protein SEC22b
CCDC173	1.57	0.00864418	1	Coiled-coil domain-containing protein 173
TNRC6B	1.57	0.0206404	1	Trinucleotide repeat-containing gene 6B protein
TTC26	1.57	0.00809418	1	Intraflagellar transport protein 56
ACOT1	1.56	0.00519615	1	Acyl-coenzyme A thioesterase 1;Acyl-coenzyme A thioesterase 2, mitochondrial
COG5	1.54	0.00402891	1	Conserved oligomeric Golgi complex subunit 5
ERO1L	1.54	6.93617e-05	1	ERO1-like protein alpha
DIDO1	1.53	0.00995883	1	Death-inducer obliterator 1
LAGE3	1.53	0.0152001	1	EKC/KEOPS complex subunit LAGE3
NFKB2	1.53	0.00613643	1	Nuclear factor NF-kappa-B p100 subunit;Nuclear factor NF-kappa-B p52 subunit
BRD4	1.52	0.00513942	1	Bromodomain-containing protein 4
CSRP1	1.52	0.0166643	1	Cysteine and glycine-rich protein 1
SLC16A3	1.52	0.0107716	1	Monocarboxylate transporter 4
CAPN13	1.51	0.0486249	1	Calpain-13
DOCK7	1.51	0.0141697	1	Dedicator of cytokinesis protein 7
CDC42EP4	1.5	0.00290941	1	Cdc42 effector protein 4
COMMD1	1.49	0.00669637	1	COMM domain-containing protein 1
DIP2B	1.49	0.0069769	1	Disco-interacting protein 2 homolog B
LAD1	1.49	0.0124948	1	Ladinin-1
NEDD8	1.49	0.00277917	1	NEDD8
MAVS	1.48	0.0378287	1	Mitochondrial antiviral-signaling protein
PTK2	1.48	0.00218321	1	Focal adhesion kinase 1
PRRC1	1.47	0.0052888	1	Protein PRRC1
FAM49B	1.46	0.00148332	1	Protein FAM49B
CPD	1.45	0.013459	1	Carboxypeptidase D
ARF5	1.44	0.0284135	1	ADP-ribosylation factor 5
ENO4	1.44	0.0105628	1	Enolase-like protein ENO4
PAFAH1B2	1.44	0.0324154	1	Platelet-activating factor acetylhydrolase IB subunit beta
PUM1	1.44	0.0154201	1	Pumilio homolog 1
KRAS	1.43	0.0176237	1	GTPase KRas;GTPase KRas, N-terminally processed
MTDH	1.43	0.00629754	1	Protein LYRIC
PRPF31	1.43	0.0159553	1	U4/U6 small nuclear ribonucleoprotein Prp31
RPS6KA1	1.43	0.000522008	1	Ribosomal protein S6 kinase alpha-1
FSCN1	1.42	0.000279609	1	Fascin
CCDC74A	1.41	0.0128978	1	Coiled-coil domain-containing protein 74A;Coiled-coil domain-containing protein 74B
MBP	1.41	0.0167803	1	Myelin basic protein
UACA	1.41	0.00724967	1	Uveal autoantigen with coiled-coil domains and ankyrin repeats
IQUB	1.4	0.0102546	1	IQ and ubiquitin-like domain-containing protein
MRPL1	1.4	0.0419597	1	39S ribosomal protein L1, mitochondrial
NAT10	1.4	0.00640863	1	N-acetyltransferase 10
PRKCD	1.4	0.0127728	1	Protein kinase C delta type;Protein kinase C delta type regulatory subunit;Protein kinase C delta type catalytic subunit
APP	1.39	0.0112751	1	Amyloid beta A4 protein;N-APP;Soluble APP-alpha;Soluble APP-beta;C99;Beta-amyloid protein 42;Beta-amyloid protein 40;C83;P3(42);P3(40);C80;Gamma-secretase C-terminal fragment 59;Gamma-secretase C-terminal fragment 57;Gamma-secretase C-terminal fragment 50;C31
CFH	1.39	0.00643404	1	Complement factor H
NBAS	1.39	0.0136949	1	Neuroblastoma-amplified sequence
RAVER1	1.39	0.0148903	1	Ribonucleoprotein PTB-binding 1
RPL18A	1.39	0.00166416	1	60S ribosomal protein L18a
ACSF3	1.38	0.011155	1	Acyl-CoA synthetase family member 3, mitochondrial
ALDH1B1	1.38	0.00242105	1	Aldehyde dehydrogenase X, mitochondrial
GNAS	1.38	0.00239336	1	Guanine nucleotide-binding protein G(s) subunit alpha isoforms XLas
RBM14	1.38	0.000458386	1	RNA-binding protein 14
XRN1	1.38	0.00905398	1	5-3 exoribonuclease 1
CDS2	1.37	0.0142027	1	Phosphatidate cytidylyltransferase 2
MAP9	1.37	0.0139413	1	Microtubule-associated protein 9
BCKDHB	1.36	0.000903095	1	2-oxoisovalerate dehydrogenase subunit beta, mitochondrial
LAMTOR5	1.36	0.00585362	1	Ragulator complex protein LAMTOR5
LPP	1.36	0.0071037	1	Lipoma-preferred partner
NHLRC2	1.36	0.0323088	1	NHL repeat-containing protein 2
PCK2	1.36	0.00312318	1	Phosphoenolpyruvate carboxykinase [GTP], mitochondrial
POLDIP2	1.36	0.00937867	1	Polymerase delta-interacting protein 2
SLC39A10	1.36	0.0381652	1	Zinc transporter ZIP10
SUPV3L1	1.36	0.0146381	1	ATP-dependent RNA helicase SUPV3L1, mitochondrial
ARHGAP12	1.35	0.0183714	1	Rho GTPase-activating protein 12
ARMC10	1.35	0.00592246	1	Armadillo repeat-containing protein 10
INIP	1.35	0.0155811	1	SOSS complex subunit C
UGT1A6	1.35	0.0288329	1	UDP-glucuronosyltransferase 1-6;UDP-glucuronosyltransferase 1-8;UDP-glucuronosyltransferase 1-10;UDP-glucuronosyltransferase 1-9;UDP-glucuronosyltransferase 1-1;UDP-glucuronosyltransferase 1-5;UDP-glucuronosyltransferase 1-3;UDP-glucuronosyltransferase 1-4
ARHGDIB	1.34	0.00838598	1	Rho GDP-dissociation inhibitor 2
DYNC1I2	1.34	0.0356773	1	Cytoplasmic dynein 1 intermediate chain 2
EIF2B1	1.34	0.0345582	1	Translation initiation factor eIF-2B subunit alpha
FLOT1	1.34	0.000767758	1	Flotillin-1
GYS1	1.34	0.000833541	1	Glycogen [starch] synthase, muscle
QIL1	1.34	0.029992	1	Protein QIL1
SQSTM1	1.34	0.00855332	1	Sequestosome-1
MT2A	1.33	0.00675598	1	Metallothionein-2
TUBG1	1.33	0.00902906	1	Tubulin gamma-1 chain;Tubulin gamma-2 chain
MRPS16	1.32	0.0121081	1	28S ribosomal protein S16, mitochondrial
SYNJ2BP	1.32	0.00238795	1	Synaptojanin-2-binding protein
TP53I11	1.32	0.0023612	1	Tumor protein p53-inducible protein 11
ABI2	1.31	0.0107334	1	Abl interactor 2
MSH3	1.31	0.0209708	1	DNA mismatch repair protein Msh3
MUC16	1.31	0.00405106	1	Mucin-16
RSF1	1.31	0.00610384	1	Remodeling and spacing factor 1
SPAG17	1.31	0.0329438	1	Sperm-associated antigen 17
ALDH1A3	1.3	0.000868524	1	Aldehyde dehydrogenase family 1 member A3
EFEMP1	1.3	0.00414675	1	EGF-containing fibulin-like extracellular matrix protein 1
GLB1	1.3	0.0155234	1	Beta-galactosidase
MYDGF	1.3	0.00035602	1	Myeloid-derived growth factor
PHF6	1.3	0.0174301	1	PHD finger protein 6
ARFGAP2	1.29	0.00133702	1	ADP-ribosylation factor GTPase-activating protein 2
BAG1	1.29	0.00332655	1	BAG family molecular chaperone regulator 1
CD109	1.29	0.00720377	1	CD109 antigen
OAS3	1.29	0.0149265	1	2-5-oligoadenylate synthase 3
SPATA6	1.29	0.0374333	1	Spermatogenesis-associated protein 6
ANXA9	1.28	0.0122406	1	Annexin A9
C3	1.28	0.0113401	1	Complement C3;Complement C3 beta chain;C3-beta-c;Complement C3 alpha chain;C3a anaphylatoxin;Acylation stimulating protein;Complement C3b alpha chain;Complement C3c alpha chain fragment 1;Complement C3dg fragment;Complement C3g fragment;Complement C3d fragment;Complement C3f fragment;Complement C3c alpha chain fragment 2
LASP1	1.28	0.0253569	1	LIM and SH3 domain protein 1
NAE1	1.28	0.00549149	1	NEDD8-activating enzyme E1 regulatory subunit
NRD1	1.28	0.0440345	1	Nardilysin
SLMAP	1.28	0.00693952	1	Sarcolemmal membrane-associated protein
VCL	1.28	0.003346	1	Vinculin
CFAP36	1.27	0.0138588	1	Cilia- and flagella-associated protein 36
DDX39A	1.27	0.0100155	1	ATP-dependent RNA helicase DDX39A
DHX36	1.27	0.0230038	1	ATP-dependent RNA helicase DHX36
MAATS1	1.27	0.0156139	1	Protein MAATS1
PTPN23	1.27	0.00765632	1	Tyrosine-protein phosphatase non-receptor type 23
RAB21	1.27	0.00263811	1	Ras-related protein Rab-21
RALGAPA2	1.26	0.0127365	1	Ral GTPase-activating protein subunit alpha-2
ALPL	1.25	0.0450024	1	Alkaline phosphatase, tissue-nonspecific isozyme
CCDC39	1.25	0.0121653	1	Coiled-coil domain-containing protein 39
CLUH	1.25	0.0145096	1	Clustered mitochondria protein homolog
CNOT1	1.25	0.0315654	1	CCR4-NOT transcription complex subunit 1
MNS1	1.25	0.00588874	1	Meiosis-specific nuclear structural protein 1
NT5C2	1.25	0.0114731	1	Cytosolic purine 5-nucleotidase
PPP5C	1.25	0.0118716	1	Serine/threonine-protein phosphatase 5
PRR15	1.25	0.00580045	1	Proline-rich protein 15
SARG	1.25	0.0156602	1	Specifically androgen-regulated gene protein
UBXN7	1.25	0.0161079	1	UBX domain-containing protein 7
DHRS1	1.24	0.00418225	1	Dehydrogenase/reductase SDR family member 1
FARSB	1.24	0.0085003	1	Phenylalanine--tRNA ligase beta subunit
NUP50	1.24	0.00785711	1	Nuclear pore complex protein Nup50
PLEC	1.24	0.0152615	1	Plectin
CLTA	1.23	0.0101581	1	Clathrin light chain A
HNMT	1.23	0.00519276	1	Histamine N-methyltransferase
CTDP1	1.22	0.0287047	1	RNA polymerase II subunit A C-terminal domain phosphatase
ODF2	1.22	0.0126106	1	Outer dense fiber protein 2
POLB	1.22	0.0268645	1	DNA polymerase beta
ADAM9	1.21	0.0371051	1	Disintegrin and metalloproteinase domain-containing protein 9
CUL1	1.21	0.00995477	1	Cullin-1
RAB5B	1.21	0.00567882	1	Ras-related protein Rab-5B
ASPH	1.2	0.000743085	1	Aspartyl/asparaginyl beta-hydroxylase
CORO1B	1.2	0.0256234	1	Coronin-1B
LIMD1	1.2	0.0103659	1	LIM domain-containing protein 1
NELFB	1.2	0.0168227	1	Negative elongation factor B
RAB3GAP1	1.2	0.0223485	1	Rab3 GTPase-activating protein catalytic subunit
SLC3A2	1.2	0.00970832	1	4F2 cell-surface antigen heavy chain
TIMM44	1.2	0.0109902	1	Mitochondrial import inner membrane translocase subunit TIM44
TPRKB	1.2	0.015376	1	EKC/KEOPS complex subunit TPRKB
ATXN2	1.19	0.0175827	1	Ataxin-2
CD74	1.19	0.016013	1	HLA class II histocompatibility antigen gamma chain
LDLRAD1	1.19	0.0305195	1	Low-density lipoprotein receptor class A domain-containing protein 1
RAB1A	1.19	0.0364922	1	Ras-related protein Rab-1A
SCIN	1.19	0.0173162	1	Adseverin
TRMT1L	1.19	0.0134175	1	TRMT1-like protein
C18orf32	1.18	0.0489214	1	UPF0729 protein C18orf32
EXOSC5	1.18	0.0437091	1	Exosome complex component RRP46
PPP1R13L	1.18	0.00190597	1	RelA-associated inhibitor
BSG	1.17	0.000705189	1	Basigin
CRABP2	1.17	0.00429409	1	Cellular retinoic acid-binding protein 2
DHX29	1.17	0.0206118	1	ATP-dependent RNA helicase DHX29
FAM136A	1.17	0.0113755	1	Protein FAM136A
GAN	1.17	0.0129368	1	Gigaxonin
GORASP2	1.17	0.00254344	1	Golgi reassembly-stacking protein 2
H1F0	1.17	0.00401031	1	Histone H1.0;Histone H1.0, N-terminally processed
TMX1	1.17	0.00401527	1	Thioredoxin-related transmembrane protein 1
DNAI2	1.16	0.00409245	1	Dynein intermediate chain 2, axonemal
EXOC1	1.16	0.0213888	1	Exocyst complex component 1
MOCS3	1.16	0.00861334	1	Adenylyltransferase and sulfurtransferase MOCS3;Molybdopterin-synthase adenylyltransferase;Molybdopterin-synthase sulfurtransferase
POLR1C	1.16	0.0087201	1	DNA-directed RNA polymerases I and III subunit RPAC1
STRN4	1.16	0.0350065	1	Striatin-4
STXBP2	1.16	0.0162716	1	Syntaxin-binding protein 2
WDR60	1.16	0.01212	1	WD repeat-containing protein 60
YTHDC1	1.16	0.0290677	1	YTH domain-containing protein 1
CDS1	1.15	0.0115624	1	Phosphatidate cytidylyltransferase 1
FZD6	1.15	0.036907	1	Frizzled-6
RDH14	1.15	0.0279197	1	Retinol dehydrogenase 14
AHCYL2	1.14	0.0148769	1	Putative adenosylhomocysteinase 3
HMGA1	1.14	0.0168604	1	High mobility group protein HMG-I/HMG-Y
HSPG2	1.14	0.0225909	1	Basement membrane-specific heparan sulfate proteoglycan core protein;Endorepellin;LG3 peptide
NUP62	1.14	0.00754327	1	Nuclear pore glycoprotein p62
SMARCA5	1.14	0.0122692	1	SWI/SNF-related matrix-associated actin-dependent regulator of chromatin subfamily A member 5
ARHGEF5	1.13	0.0312308	1	Rho guanine nucleotide exchange factor 5
CDKN2A	1.13	0.00308931	1	Cyclin-dependent kinase inhibitor 2A;Cyclin-dependent kinase 4 inhibitor B
CORO1C	1.13	0.0159304	1	Coronin-1C
ERN2	1.13	0.0170355	1	Serine/threonine-protein kinase/endoribonuclease IRE2;Serine/threonine-protein kinase;Endoribonuclease
GIGYF2	1.13	0.0284401	1	PERQ amino acid-rich with GYF domain-containing protein 2
GTF3C1	1.13	0.0369129	1	General transcription factor 3C polypeptide 1
IFT57	1.13	0.0131268	1	Intraflagellar transport protein 57 homolog
MRPS27	1.13	0.0118752	1	28S ribosomal protein S27, mitochondrial
PDXDC1	1.13	0.0033719	1	Pyridoxal-dependent decarboxylase domain-containing protein 1
PRCC	1.13	0.0343052	1	Proline-rich protein PRCC
PXN	1.13	0.00767468	1	Paxillin
SMARCD2	1.13	0.0220064	1	SWI/SNF-related matrix-associated actin-dependent regulator of chromatin subfamily D member 2
TXNDC17	1.13	0.0116097	1	Thioredoxin domain-containing protein 17
CASK	1.12	0.0358229	1	Peripheral plasma membrane protein CASK
CDK5	1.12	0.0137374	1	Cyclin-dependent-like kinase 5
GPNMB	1.12	0.0286923	1	Transmembrane glycoprotein NMB
KIAA1468	1.12	0.0268805	1	LisH domain and HEAT repeat-containing protein KIAA1468
MAP7	1.12	0.018578	1	Ensconsin
NCBP2	1.12	0.0255692	1	Nuclear cap-binding protein subunit 2
GSTM2	1.11	0.0191387	1	Glutathione S-transferase Mu 2
ME3	1.11	0.0418011	1	NADP-dependent malic enzyme, mitochondrial
MIA2	1.11	0.0101156	1	Melanoma inhibitory activity protein 2
CAB39	1.1	0.0180798	1	Calcium-binding protein 39
CHERP	1.1	0.0276832	1	Calcium homeostasis endoplasmic reticulum protein
DAP3	1.1	0.0324615	1	28S ribosomal protein S29, mitochondrial
GOLGA3	1.1	0.016181	1	Golgin subfamily A member 3
OCC1	1.1	0.0272713	1	Overexpressed in colon carcinoma 1 protein
PPIG	1.1	0.0334359	1	Peptidyl-prolyl cis-trans isomerase G
SPATA33	1.1	0.0305828	1	Spermatogenesis-associated protein 33
SULT1A4	1.1	0.0274674	1	Sulfotransferase 1A4;Sulfotransferase 1A3
ANKFY1	1.09	0.0082609	1	Rabankyrin-5
GIPC1	1.09	0.0164142	1	PDZ domain-containing protein GIPC1
STMND1	1.09	0.0187343	1	Stathmin domain-containing protein 1
ZC3H11A	1.09	0.0235356	1	Zinc finger CCCH domain-containing protein 11A
CUL4B	1.08	0.0192798	1	Cullin-4B
HM13	1.08	0.0231569	1	Minor histocompatibility antigen H13
PDE12	1.08	0.0137714	1	2,5-phosphodiesterase 12
PRPF4	1.08	0.0159387	1	U4/U6 small nuclear ribonucleoprotein Prp4
PRPSAP2	1.08	0.00524841	1	Phosphoribosyl pyrophosphate synthase-associated protein 2
COX17	1.07	0.00984207	1	Cytochrome c oxidase copper chaperone
CPOX	1.07	0.00568032	1	Oxygen-dependent coproporphyrinogen-III oxidase, mitochondrial
IFT22	1.07	0.0185506	1	Intraflagellar transport protein 22 homolog
NEDD4L	1.07	0.00631436	1	E3 ubiquitin-protein ligase NEDD4-like
SLC26A2	1.07	0.00574121	1	Sulfate transporter
TLN1	1.07	0.0410114	1	Talin-1
WARS2	1.07	0.0250143	1	Tryptophan--tRNA ligase, mitochondrial
ARMC3	1.06	0.0495251	1	Armadillo repeat-containing protein 3
ASS1	1.06	0.0192027	1	Argininosuccinate synthase
GNPDA1	1.06	0.00474398	1	Glucosamine-6-phosphate isomerase 1
PGRMC1	1.06	0.012771	1	Membrane-associated progesterone receptor component 1
SURF4	1.06	0.0390913	1	Surfeit locus protein 4
EHD2	1.05	0.0321476	1	EH domain-containing protein 2
FAS	1.05	0.0160861	1	Tumor necrosis factor receptor superfamily member 6
GTF3C3	1.05	0.0377681	1	General transcription factor 3C polypeptide 3
HSPA2	1.05	0.0157024	1	Heat shock-related 70 kDa protein 2
IPO7	1.05	0.0207609	1	Importin-7
LYZ	1.05	0.0174665	1	Lysozyme C
NRAS	1.05	0.0333545	1	GTPase NRas
PDLIM5	1.05	0.0136002	1	PDZ and LIM domain protein 5
RPS17	1.05	0.0193836	1	40S ribosomal protein S17
RRP12	1.05	0.0437651	1	RRP12-like protein
SMARCE1	1.05	0.00888282	1	SWI/SNF-related matrix-associated actin-dependent regulator of chromatin subfamily E member 1
ARPC5	1.04	0.00702353	1	Actin-related protein 2/3 complex subunit 5
DSG2	1.04	0.00662802	1	Desmoglein-2
EIF3K	1.04	0.0178651	1	Eukaryotic translation initiation factor 3 subunit K
GAS2L2	1.04	0.0152338	1	GAS2-like protein 2
IMPA1	1.04	0.0138944	1	Inositol monophosphatase 1
NDUFB4	1.04	0.0160977	1	NADH dehydrogenase [ubiquinone] 1 beta subcomplex subunit 4
NQO2	1.04	0.0318307	1	Ribosyldihydronicotinamide dehydrogenase [quinone]
PEX19	1.04	0.0220103	1	Peroxisomal biogenesis factor 19
PTRF	1.04	0.033376	1	Polymerase I and transcript release factor
SIRT5	1.04	0.02887	1	NAD-dependent protein deacylase sirtuin-5, mitochondrial
TES	1.04	0.0235269	1	Testin
UBE2N	1.04	0.0302092	1	Ubiquitin-conjugating enzyme E2 N
VAMP8	1.04	0.00724521	1	Vesicle-associated membrane protein 8
WDR82	1.04	0.00808053	1	WD repeat-containing protein 82
ATP6V1E1	1.03	0.0313122	1	V-type proton ATPase subunit E 1
LZIC	1.03	0.0368161	1	Protein LZIC
ME1	1.03	0.0214652	1	NADP-dependent malic enzyme
PLEKHG7	1.03	0.013222	1	Pleckstrin homology domain-containing family G member 7
RNMT	1.03	0.0178928	1	mRNA cap guanine-N7 methyltransferase
YES1	1.03	0.0129624	1	Tyrosine-protein kinase Yes
EXOC7	1.02	0.008582	1	Exocyst complex component 7
FLNB	1.02	0.00150795	1	Filamin-B
ITGB4	1.02	0.0209199	1	Integrin beta-4
PCIF1	1.02	0.0358962	1	Phosphorylated CTD-interacting factor 1
PSMB4	1.02	0.0159363	1	Proteasome subunit beta type-4
SIAE	1.02	0.0173324	1	Sialate O-acetylesterase
SLTM	1.02	0.0208142	1	SAFB-like transcription modulator
SSR4	1.02	0.0178349	1	Translocon-associated protein subunit delta
STOM	1.02	0.0312452	1	Erythrocyte band 7 integral membrane protein
SYMPK	1.02	0.0325515	1	Symplekin
TCOF1	1.02	0.0132661	1	Treacle protein
TMED4	1.02	0.00464313	1	Transmembrane emp24 domain-containing protein 4
AK4	1.01	0.0169646	1	Adenylate kinase 4, mitochondrial
CNP	1.01	0.00799321	1	2,3-cyclic-nucleotide 3-phosphodiesterase
COG7	1.01	0.0174423	1	Conserved oligomeric Golgi complex subunit 7
GALNT3	1.01	0.0266862	1	Polypeptide N-acetylgalactosaminyltransferase 3
TMCO1	1.01	0.0165893	1	Transmembrane and coiled-coil domain-containing protein 1
TXNDC5	1.01	0.00611266	1	Thioredoxin domain-containing protein 5
EFHC2	1	0.0257199	1	EF-hand domain-containing family member C2
OXCT1	1	0.0278175	1	Succinyl-CoA:3-ketoacid coenzyme A transferase 1, mitochondrial
UTRN	1	0.0332253	1	Utrophin
CLIC4	0.999	0.0496753	1	Chloride intracellular channel protein 4
TSSC1	0.999	0.0331361	1	Protein TSSC1
AK2	0.997	0.0104161	1	Adenylate kinase 2, mitochondrial;Adenylate kinase 2, mitochondrial, N-terminally processed
APPL1	0.997	0.0269952	1	DCC-interacting protein 13-alpha
STIM1	0.997	0.00443566	1	Stromal interaction molecule 1
SDC1	0.995	0.00930035	1	Syndecan-1
CD81	0.994	0.0177945	1	CD81 antigen
ZC3H15	0.994	0.0197304	1	Zinc finger CCCH domain-containing protein 15
UAP1	0.991	0.0286472	1	UDP-N-acetylhexosamine pyrophosphorylase;UDP-N-acetylgalactosamine pyrophosphorylase;UDP-N-acetylglucosamine pyrophosphorylase
BDH2	0.99	0.0278256	1	3-hydroxybutyrate dehydrogenase type 2
PFKM	0.99	0.0355447	1	ATP-dependent 6-phosphofructokinase, muscle type
SH3PXD2B	0.989	0.0373902	1	SH3 and PX domain-containing protein 2B
CFAP58	0.988	0.0321932	1	Cilia- and flagella-associated protein 58
MSN	0.988	0.0183043	1	Moesin
ACOX3	0.986	0.0156775	1	Peroxisomal acyl-coenzyme A oxidase 3
NUDT19	0.985	0.00798084	1	Nucleoside diphosphate-linked moiety X motif 19, mitochondrial
TPM4	0.983	0.00567669	1	Tropomyosin alpha-4 chain
PPP1R8	0.982	0.0285616	1	Nuclear inhibitor of protein phosphatase 1;Activator of RNA decay
CAP2	0.981	0.0180347	1	Adenylyl cyclase-associated protein 2
GNPNAT1	0.98	0.0146023	1	Glucosamine 6-phosphate N-acetyltransferase
ARID1A	0.977	0.0113306	1	AT-rich interactive domain-containing protein 1A
BPGM	0.975	0.00160573	1	Bisphosphoglycerate mutase
M6PR	0.975	0.0170826	1	Cation-dependent mannose-6-phosphate receptor
DLST	0.974	0.00790239	1	Dihydrolipoyllysine-residue succinyltransferase component of 2-oxoglutarate dehydrogenase complex, mitochondrial
SLC25A3	0.974	0.00277449	1	Phosphate carrier protein, mitochondrial
PIGK	0.973	0.0174178	1	GPI-anchor transamidase
SPATA6L	0.971	0.034086	1	Spermatogenesis associated 6-like protein
STXBP3	0.971	0.0241157	1	Syntaxin-binding protein 3
DNAJC3	0.97	0.00952502	1	DnaJ homolog subfamily C member 3
RPRD2	0.967	0.0259126	1	Regulation of nuclear pre-mRNA domain-containing protein 2
TRIM2	0.961	0.0152097	1	Tripartite motif-containing protein 2
CIAPIN1	0.96	0.0109645	1	Anamorsin
PIN4	0.955	0.0197767	1	Peptidyl-prolyl cis-trans isomerase NIMA-interacting 4
YWHAB	0.955	0.0268159	1	14-3-3 protein beta/alpha;14-3-3 protein beta/alpha, N-terminally processed
GOLGA2	0.95	0.024213	1	Golgin subfamily A member 2
ACOX1	0.949	0.0255877	1	Peroxisomal acyl-coenzyme A oxidase 1
PROM1	0.947	0.0172294	1	Prominin-1
NUP107	0.942	0.0313387	1	Nuclear pore complex protein Nup107
RPL35	0.941	0.0422222	1	60S ribosomal protein L35
TCTEX1D4	0.941	0.0309843	1	Tctex1 domain-containing protein 4
CHID1	0.94	0.0204105	1	Chitinase domain-containing protein 1
MRPL15	0.94	0.020243	1	39S ribosomal protein L15, mitochondrial
ACADS	0.939	0.0284661	1	Short-chain specific acyl-CoA dehydrogenase, mitochondrial
MTPN	0.938	0.00334673	1	Myotrophin
PRDX4	0.938	0.0496053	1	Peroxiredoxin-4
PREB	0.936	0.0144083	1	Prolactin regulatory element-binding protein
PEPD	0.934	0.0292062	1	Xaa-Pro dipeptidase
CUL3	0.933	0.0197759	1	Cullin-3
USP39	0.931	0.018337	1	U4/U6.U5 tri-snRNP-associated protein 2
NSDHL	0.93	0.0184055	1	Sterol-4-alpha-carboxylate 3-dehydrogenase, decarboxylating
ST14	0.928	0.0106121	1	Suppressor of tumorigenicity 14 protein
ASB9	0.927	0.0326883	1	Ankyrin repeat and SOCS box protein 9
DRC1	0.925	0.0275971	1	Dynein regulatory complex protein 1
CTSZ	0.923	0.0469756	1	Cathepsin Z
TOLLIP	0.923	0.0251681	1	Toll-interacting protein
INPP1	0.921	0.0330538	1	Inositol polyphosphate 1-phosphatase
PLEKHS1	0.921	0.0106987	1	Pleckstrin homology domain-containing family S member 1
PLAA	0.919	0.045405	1	Phospholipase A-2-activating protein
CKAP4	0.918	0.00722225	1	Cytoskeleton-associated protein 4
THOP1	0.918	0.0231822	1	Thimet oligopeptidase
NOL6	0.917	0.0324041	1	Nucleolar protein 6
PDHA1	0.915	0.0128623	1	Pyruvate dehydrogenase E1 component subunit alpha, somatic form, mitochondrial
ARHGAP1	0.914	0.0111167	1	Rho GTPase-activating protein 1
RAB3GAP2	0.914	0.037517	1	Rab3 GTPase-activating protein non-catalytic subunit
GLYR1	0.913	0.0187662	1	Putative oxidoreductase GLYR1
ARMC6	0.912	0.027797	1	Armadillo repeat-containing protein 6
CSNK2A2	0.912	0.021596	1	Casein kinase II subunit alpha
FAM114A1	0.911	0.00851846	1	Protein NOXP20
ACSF2	0.907	0.00606217	1	Acyl-CoA synthetase family member 2, mitochondrial
IFT27	0.905	0.0465394	1	Intraflagellar transport protein 27 homolog
PON2	0.901	0.0262553	1	Serum paraoxonase/arylesterase 2
CST3	0.9	0.0415025	1	Cystatin-C
SLC12A2	0.9	0.0299508	1	Solute carrier family 12 member 2
COQ5	0.899	0.0220358	1	2-methoxy-6-polyprenyl-1,4-benzoquinol methylase, mitochondrial
ILK	0.899	0.038907	1	Integrin-linked protein kinase
PCCA	0.898	0.0219995	1	Propionyl-CoA carboxylase alpha chain, mitochondrial
NDUFB5	0.895	0.0378809	1	NADH dehydrogenase [ubiquinone] 1 beta subcomplex subunit 5, mitochondrial
ALDH2	0.894	0.0104776	1	Aldehyde dehydrogenase, mitochondrial
SPATS2L	0.892	0.00669297	1	SPATS2-like protein
CCDC78	0.887	0.0262532	1	Coiled-coil domain-containing protein 78
SNTN	0.886	0.0146859	1	Sentan
PFKP	0.885	0.0180841	1	ATP-dependent 6-phosphofructokinase, platelet type
PSIP1	0.883	0.0321701	1	PC4 and SFRS1-interacting protein
RBX1	0.883	0.033292	1	E3 ubiquitin-protein ligase RBX1;E3 ubiquitin-protein ligase RBX1, N-terminally processed
DNAAF5	0.879	0.0235798	1	Dynein assembly factor 5, axonemal
AK3	0.878	0.0297191	1	GTP:AMP phosphotransferase AK3, mitochondrial
AIP	0.871	0.0110424	1	AH receptor-interacting protein
CRKL	0.871	0.0155208	1	Crk-like protein
ENO2	0.871	0.0117187	1	Gamma-enolase
PTPRZ1	0.87	0.027422	1	Receptor-type tyrosine-protein phosphatase zeta
IQGAP2	0.869	0.0246227	1	Ras GTPase-activating-like protein IQGAP2
LRRC45	0.868	0.0212164	1	Leucine-rich repeat-containing protein 45
MGLL	0.866	0.0404287	1	Monoglyceride lipase
MRPL27	0.866	0.03085	1	39S ribosomal protein L27, mitochondrial
SNRPB2	0.866	0.0483634	1	U2 small nuclear ribonucleoprotein B
PFDN6	0.862	0.0175898	1	Prefoldin subunit 6
PLXNB1	0.861	0.0303796	1	Plexin-B1
U2SURP	0.859	0.0321077	1	U2 snRNP-associated SURP motif-containing protein
CHCHD6	0.858	0.0482797	1	MICOS complex subunit MIC25
CEP135	0.857	0.0245796	1	Centrosomal protein of 135 kDa
CCDC22	0.856	0.0299662	1	Coiled-coil domain-containing protein 22
TACSTD2	0.855	0.0452869	1	Tumor-associated calcium signal transducer 2
VASP	0.855	0.00890333	1	Vasodilator-stimulated phosphoprotein
IFT140	0.854	0.0363538	1	Intraflagellar transport protein 140 homolog
NFIA	0.853	0.0240764	1	Nuclear factor 1 A-type
MBOAT2	0.852	0.0322183	1	Lysophospholipid acyltransferase 2
BRCC3	0.85	0.032985	1	Lys-63-specific deubiquitinase BRCC36
ROPN1L	0.847	0.0415861	1	Ropporin-1-like protein
IFT52	0.846	0.0452749	1	Intraflagellar transport protein 52 homolog
PITPNM1	0.845	0.0323161	1	Membrane-associated phosphatidylinositol transfer protein 1
CASP7	0.844	0.0379687	1	Caspase-7;Caspase-7 subunit p20;Caspase-7 subunit p11
FAM129A	0.843	0.0243994	1	Protein Niban
NAA50	0.841	0.0333421	1	N-alpha-acetyltransferase 50
CUL2	0.836	0.0314996	1	Cullin-2
CECR5	0.833	0.0388266	1	Cat eye syndrome critical region protein 5
ENKUR	0.832	0.0222213	1	Enkurin
IGFBP3	0.829	0.0453195	1	Insulin-like growth factor-binding protein 3
PPP4R2	0.829	0.0352505	1	Serine/threonine-protein phosphatase 4 regulatory subunit 2
CIAO1	0.827	0.0227874	1	Probable cytosolic iron-sulfur protein assembly protein CIAO1
DEK	0.827	0.0283564	1	Protein DEK
LYPLAL1	0.827	0.0348255	1	Lysophospholipase-like protein 1
PITRM1	0.826	0.0439838	1	Presequence protease, mitochondrial
CLCA4	0.825	0.00806528	1	Calcium-activated chloride channel regulator 4;Calcium-activated chloride channel regulator 4, 110 kDa form;Calcium-activated chloride channel regulator 4, 30 kDa form
NPEPPS	0.825	0.0183276	1	Puromycin-sensitive aminopeptidase
STIM2	0.825	0.0452309	1	Stromal interaction molecule 2
STX4	0.825	0.0465422	1	Syntaxin-4
CD99	0.824	0.0348856	1	CD99 antigen
EHBP1L1	0.821	0.0285757	1	EH domain-binding protein 1-like protein 1
RAE1	0.821	0.017766	1	mRNA export factor
NSF	0.82	0.0246095	1	Vesicle-fusing ATPase
RABGAP1	0.82	0.0297844	1	Rab GTPase-activating protein 1
CDC42BPB	0.818	0.0483983	1	Serine/threonine-protein kinase MRCK beta
GMDS	0.818	0.0187291	1	GDP-mannose 4,6 dehydratase
SLC20A2	0.816	0.0365521	1	Sodium-dependent phosphate transporter 2
OGFR	0.815	0.0151038	1	Opioid growth factor receptor
SNRNP40	0.815	0.0203673	1	U5 small nuclear ribonucleoprotein 40 kDa protein
ADAM17	0.81	0.0352723	1	Disintegrin and metalloproteinase domain-containing protein 17
RAB18	0.809	0.0369112	1	Ras-related protein Rab-18
SLC39A7	0.809	0.0166971	1	Zinc transporter SLC39A7
PSMD7	0.807	0.0228523	1	26S proteasome non-ATPase regulatory subunit 7
RECQL	0.806	0.0203254	1	ATP-dependent DNA helicase Q1
HPRT1	0.805	0.0441281	1	Hypoxanthine-guanine phosphoribosyltransferase
LRPAP1	0.805	0.0416085	1	Alpha-2-macroglobulin receptor-associated protein
TMTC3	0.805	0.0267017	1	Transmembrane and TPR repeat-containing protein 3
HNRNPDL	0.804	0.0337615	1	Heterogeneous nuclear ribonucleoprotein D-like
GNA13	0.799	0.0322505	1	Guanine nucleotide-binding protein subunit alpha-13
ISYNA1	0.798	0.0469784	1	Inositol-3-phosphate synthase 1
NFU1	0.798	0.0363682	1	NFU1 iron-sulfur cluster scaffold homolog, mitochondrial
MCM5	0.797	0.0440944	1	DNA replication licensing factor MCM5
TRIP10	0.796	0.0163872	1	Cdc42-interacting protein 4
STAU1	0.79	0.0140532	1	Double-stranded RNA-binding protein Staufen homolog 1
AAMDC	0.787	0.0168867	1	Mth938 domain-containing protein
TMF1	0.787	0.024326	1	TATA element modulatory factor
RHOG	0.785	0.024591	1	Rho-related GTP-binding protein RhoG
RPS6KA3	0.785	0.038457	1	Ribosomal protein S6 kinase alpha-3
CDK1	0.784	0.0326797	1	Cyclin-dependent kinase 1
NUP88	0.784	0.032614	1	Nuclear pore complex protein Nup88
BCCIP	0.781	0.0235772	1	BRCA2 and CDKN1A-interacting protein
MAPK13	0.777	0.024546	1	Mitogen-activated protein kinase 13
IL18	0.776	0.0473149	1	Interleukin-18
CDH3	0.775	0.0403516	1	Cadherin-3
ATP2B4	0.772	0.0212067	1	Plasma membrane calcium-transporting ATPase 4
POF1B	0.77	0.0364526	1	Protein POF1B
SEC24C	0.769	0.0448284	1	Protein transport protein Sec24C
TTC1	0.769	0.035719	1	Tetratricopeptide repeat protein 1
NDUFA2	0.768	0.0471485	1	NADH dehydrogenase [ubiquinone] 1 alpha subcomplex subunit 2
CD44	0.767	0.0416667	1	CD44 antigen
STK24	0.765	0.0347972	1	Serine/threonine-protein kinase 24;Serine/threonine-protein kinase 24 36 kDa subunit;Serine/threonine-protein kinase 24 12 kDa subunit
HLA-A	0.764	0.0318643	1	HLA class I histocompatibility antigen, A-3 alpha chain
POFUT1	0.763	0.0452862	1	GDP-fucose protein O-fucosyltransferase 1
CCDC40	0.758	0.0414676	1	Coiled-coil domain-containing protein 40
PSCA	0.758	0.0225813	1	Prostate stem cell antigen
SFXN1	0.756	0.0418393	1	Sideroflexin-1
YTHDF3	0.755	0.039949	1	YTH domain-containing family protein 3
DBNL	0.748	0.0162111	1	Drebrin-like protein
ODR4	0.742	0.0337566	1	Protein odr-4 homolog
BID	0.741	0.0283928	1	BH3-interacting domain death agonist;BH3-interacting domain death agonist p15;BH3-interacting domain death agonist p13;BH3-interacting domain death agonist p11
LY75	0.741	0.0298325	1	Lymphocyte antigen 75
IRGQ	0.734	0.0210992	1	Immunity-related GTPase family Q protein
MYH9	0.734	0.0262002	1	Myosin-9
NSUN2	0.734	0.0485542	1	tRNA (cytosine(34)-C(5))-methyltransferase
SMARCB1	0.732	0.0331546	1	SWI/SNF-related matrix-associated actin-dependent regulator of chromatin subfamily B member 1
PDCD10	0.731	0.0428975	1	Programmed cell death protein 10
ATP5J2	0.73	0.0456276	1	ATP synthase subunit f, mitochondrial
TNKS1BP1	0.724	0.0308274	1	182 kDa tankyrase-1-binding protein
EEA1	0.721	0.0188862	1	Early endosome antigen 1
S100A4	0.721	0.013965	1	Protein S100-A4
CTBP2	0.719	0.0450701	1	C-terminal-binding protein 2
WASF2	0.712	0.0317678	1	Wiskott-Aldrich syndrome protein family member 2
IRF2BP2	0.709	0.0448101	1	Interferon regulatory factor 2-binding protein 2
MGST3	0.709	0.0271063	1	Microsomal glutathione S-transferase 3
PLS1	0.704	0.0389464	1	Plastin-1
MRPS6	0.703	0.0387022	1	28S ribosomal protein S6, mitochondrial
CASP3	0.692	0.0374863	1	Caspase-3;Caspase-3 subunit p17;Caspase-3 subunit p12
SRM	0.691	0.0481058	1	Spermidine synthase
DPY30	0.676	0.0394351	1	Protein dpy-30 homolog
ARPC1B	0.671	0.0278041	1	Actin-related protein 2/3 complex subunit 1B
STEAP3	0.669	0.0256916	1	Metalloreductase STEAP3
SLC7A5	0.663	0.0296132	1	Large neutral amino acids transporter small subunit 1
HDLBP	0.662	0.0333835	1	Vigilin
HSPB11	0.662	0.0436085	1	Intraflagellar transport protein 25 homolog
SLC9A3R2	0.656	0.0250317	1	Na(+)/H(+) exchange regulatory cofactor NHE-RF2
SON	0.656	0.0449803	1	Protein SON
C8orf82	0.65	0.0362869	1	UPF0598 protein C8orf82
RAB2A	0.646	0.0392956	1	Ras-related protein Rab-2A
PPP2R2A	0.641	0.0420589	1	Serine/threonine-protein phosphatase 2A 55 kDa regulatory subunit B alpha isoform
SUCLG2	0.635	0.0453587	1	Succinyl-CoA ligase [GDP-forming] subunit beta, mitochondrial
RAP1B	0.625	0.0399009	1	Ras-related protein Rap-1b;Ras-related protein Rap-1b-like protein
NAP1L4	0.623	0.0462641	1	Nucleosome assembly protein 1-like 4
NDUFA10	0.616	0.0499704	1	NADH dehydrogenase [ubiquinone] 1 alpha subcomplex subunit 10, mitochondrial
PKP3	0.609	0.0375976	1	Plakophilin-3
SEPT7	0.609	0.0424348	1	Septin-7
FAHD1	0.603	0.0454978	1	Acylpyruvase FAHD1, mitochondrial
PNPO	0.593	0.0488153	1	Pyridoxine-5-phosphate oxidase
EEF1A1	0.58	0.0450149	1	Elongation factor 1-alpha 1;Putative elongation factor 1-alpha-like 3
NOP58	0.55	0.0445758	1	Nucleolar protein 58
TUBB4B	-0.586	0.0349841	1	Tubulin beta-4B chain
UPF1	-0.644	0.0452513	1	Regulator of nonsense transcripts 1
ABLIM1	-0.646	0.0490676	1	Actin-binding LIM protein 1
CANX	-0.662	0.0227235	1	Calnexin
HYPK	-0.663	0.0369205	1	Huntingtin-interacting protein K
CHORDC1	-0.665	0.0360845	1	Cysteine and histidine-rich domain-containing protein 1
YWHAE	-0.671	0.0431924	1	14-3-3 protein epsilon
HIBADH	-0.676	0.0387395	1	3-hydroxyisobutyrate dehydrogenase, mitochondrial
UQCRC2	-0.678	0.0469684	1	Cytochrome b-c1 complex subunit 2, mitochondrial
CD9	-0.692	0.0439653	1	CD9 antigen
HIP1R	-0.704	0.0375727	1	Huntingtin-interacting protein 1-related protein
COPS6	-0.707	0.0458269	1	COP9 signalosome complex subunit 6
SPATA18	-0.711	0.0397602	1	Mitochondria-eating protein
CACYBP	-0.72	0.0438612	1	Calcyclin-binding protein
XRCC1	-0.72	0.0421269	1	DNA repair protein XRCC1
ILF2	-0.723	0.0229298	1	Interleukin enhancer-binding factor 2
ATP2A2	-0.732	0.0338059	1	Sarcoplasmic/endoplasmic reticulum calcium ATPase 2
TRAP1	-0.742	0.0425122	1	Heat shock protein 75 kDa, mitochondrial
CLTC	-0.746	0.0284236	1	Clathrin heavy chain 1
GNAI2	-0.749	0.0257101	1	Guanine nucleotide-binding protein G(i) subunit alpha-2
SMU1	-0.752	0.0376063	1	WD40 repeat-containing protein SMU1;WD40 repeat-containing protein SMU1, N-terminally processed
PRDX1	-0.758	0.0428182	1	Peroxiredoxin-1
NUMA1	-0.765	0.045283	1	Nuclear mitotic apparatus protein 1
HSP90AA1	-0.77	0.0142257	1	Heat shock protein HSP 90-alpha
MLLT4	-0.78	0.0321265	1	Afadin
PRDX5	-0.785	0.0401353	1	Peroxiredoxin-5, mitochondrial
EZR	-0.787	0.0174703	1	Ezrin
PSME1	-0.787	0.00954249	1	Proteasome activator complex subunit 1
CCT5	-0.788	0.0249916	1	T-complex protein 1 subunit epsilon
RPS15A	-0.788	0.0456457	1	40S ribosomal protein S15a
ERLIN2	-0.793	0.0407761	1	Erlin-2
PRKCSH	-0.797	0.0345467	1	Glucosidase 2 subunit beta
EML2	-0.799	0.0152924	1	Echinoderm microtubule-associated protein-like 2
CCAR1	-0.812	0.0451674	1	Cell division cycle and apoptosis regulator protein 1
IFT46	-0.816	0.0458442	1	Intraflagellar transport protein 46 homolog
BPNT1	-0.822	0.0308869	1	3(2),5-bisphosphate nucleotidase 1
LZTFL1	-0.823	0.029787	1	Leucine zipper transcription factor-like protein 1
HSPBP1	-0.828	0.0405625	1	Hsp70-binding protein 1
DKC1	-0.835	0.0265609	1	H/ACA ribonucleoprotein complex subunit 4
ALDH16A1	-0.845	0.0291641	1	Aldehyde dehydrogenase family 16 member A1
GLOD4	-0.846	0.0304943	1	Glyoxalase domain-containing protein 4
UBTF	-0.853	0.0241954	1	Nucleolar transcription factor 1
DNAH11	-0.856	0.0494398	1	Dynein heavy chain 11, axonemal
TPR	-0.856	0.0455402	1	Nucleoprotein TPR
ALDH9A1	-0.857	0.0101472	1	4-trimethylaminobutyraldehyde dehydrogenase
RUVBL2	-0.858	0.00665163	1	RuvB-like 2
RSPH9	-0.861	0.0347686	1	Radial spoke head protein 9 homolog
DNAJB13	-0.868	0.0223767	1	DnaJ homolog subfamily B member 13
NPC2	-0.868	0.0463867	1	Epididymal secretory protein E1
RAN	-0.871	0.0306607	1	GTP-binding nuclear protein Ran
GLUL	-0.873	0.0483725	1	Glutamine synthetase
CPT1A	-0.881	0.0384608	1	Carnitine O-palmitoyltransferase 1, liver isoform
SKP1	-0.885	0.0123629	1	S-phase kinase-associated protein 1
LIN7C	-0.887	0.0336818	1	Protein lin-7 homolog C
PRPF40A	-0.889	0.0396984	1	Pre-mRNA-processing factor 40 homolog A
SEC13	-0.895	0.0321503	1	Protein SEC13 homolog
EIF3F	-0.897	0.0367279	1	Eukaryotic translation initiation factor 3 subunit F
QARS	-0.9	0.00634244	1	Glutamine--tRNA ligase
PHGDH	-0.903	0.0284284	1	D-3-phosphoglycerate dehydrogenase
SPAG1	-0.919	0.0321331	1	Sperm-associated antigen 1
HSPA1B	-0.92	0.0417215	1	Heat shock 70 kDa protein 1B;Heat shock 70 kDa protein 1A
IFT74	-0.921	0.0456082	1	Intraflagellar transport protein 74 homolog
SCP2	-0.925	0.00387315	1	Non-specific lipid-transfer protein
ABHD11	-0.935	0.0296553	1	Alpha/beta hydrolase domain-containing protein 11
XPNPEP3	-0.935	0.0367713	1	Probable Xaa-Pro aminopeptidase 3
HSD17B12	-0.943	0.030046	1	Very-long-chain 3-oxoacyl-CoA reductase
ARHGAP18	-0.944	0.0146236	1	Rho GTPase-activating protein 18
KTN1	-0.944	0.0120404	1	Kinectin
RPL30	-0.952	0.0211016	1	60S ribosomal protein L30
CYCS	-0.959	0.0455683	1	Cytochrome c
MARS	-0.961	0.00734131	1	Methionine--tRNA ligase, cytoplasmic
PSMA5	-0.968	0.00488422	1	Proteasome subunit alpha type-5
RPN2	-0.969	0.0330917	1	Dolichyl-diphosphooligosaccharide--protein glycosyltransferase subunit 2
CCT7	-0.972	0.0292399	1	T-complex protein 1 subunit eta
OSCP1	-0.982	0.0162483	1	Protein OSCP1
NT5C	-0.983	0.0301448	1	5(3)-deoxyribonucleotidase, cytosolic type
PRDX6	-0.984	0.0226541	1	Peroxiredoxin-6
RUVBL1	-0.988	0.00652087	1	RuvB-like 1
ACAT1	-0.992	0.000857841	1	Acetyl-CoA acetyltransferase, mitochondrial
ARF1	-0.996	0.0136361	1	ADP-ribosylation factor 1;ADP-ribosylation factor 3
SUGT1	-0.999	0.00593255	1	Suppressor of G2 allele of SKP1 homolog
ATP5J	-1.01	0.0189106	1	ATP synthase-coupling factor 6, mitochondrial
CES2	-1.01	0.0351826	1	Cocaine esterase
CPT2	-1.01	0.0180808	1	Carnitine O-palmitoyltransferase 2, mitochondrial
ACTR1A	-1.02	0.0170393	1	Alpha-centractin
HSPH1	-1.02	0.0264997	1	Heat shock protein 105 kDa
PABPC4	-1.02	0.0213342	1	Polyadenylate-binding protein 4
VAPA	-1.02	0.0105404	1	Vesicle-associated membrane protein-associated protein A
IMPDH2	-1.03	0.0285508	1	Inosine-5-monophosphate dehydrogenase 2
DNAJB1	-1.04	0.0356409	1	DnaJ homolog subfamily B member 1
RPLP2	-1.04	0.0267594	1	60S acidic ribosomal protein P2
PIGR	-1.05	0.0295106	1	Polymeric immunoglobulin receptor;Secretory component
SFPQ	-1.05	0.00466769	1	Splicing factor, proline- and glutamine-rich
UFM1	-1.06	0.00624477	1	Ubiquitin-fold modifier 1
AGK	-1.08	0.0206763	1	Acylglycerol kinase, mitochondrial
RSPH1	-1.08	0.00302352	1	Radial spoke head 1 homolog
BANF1	-1.09	0.0304347	1	Barrier-to-autointegration factor;Barrier-to-autointegration factor, N-terminally processed
HAGH	-1.09	0.00351739	1	Hydroxyacylglutathione hydrolase, mitochondrial
PSMD11	-1.09	0.00707489	1	26S proteasome non-ATPase regulatory subunit 11
RBM3	-1.09	0.00396464	1	RNA-binding protein 3
ARMC4	-1.1	0.0027225	1	Armadillo repeat-containing protein 4
C1QBP	-1.1	0.00439477	1	Complement component 1 Q subcomponent-binding protein, mitochondrial
DNAI1	-1.1	0.00790632	1	Dynein intermediate chain 1, axonemal
AK7	-1.11	0.00969522	1	Adenylate kinase 7
DDX1	-1.11	0.0116643	1	ATP-dependent RNA helicase DDX1
SPRR1A	-1.11	0.0188443	1	Cornifin-A
TOMM34	-1.11	0.00255258	1	Mitochondrial import receptor subunit TOM34
LRPPRC	-1.12	0.0233426	1	Leucine-rich PPR motif-containing protein, mitochondrial
TPPP3	-1.12	0.00626254	1	Tubulin polymerization-promoting protein family member 3
LLGL2	-1.13	0.00251869	1	Lethal(2) giant larvae protein homolog 2
MTCH2	-1.13	0.000969897	1	Mitochondrial carrier homolog 2
STAT3	-1.14	0.00506452	1	Signal transducer and activator of transcription 3
TTLL12	-1.15	0.0050135	1	Tubulin--tyrosine ligase-like protein 12
ALCAM	-1.16	0.035554	1	CD166 antigen
AHSA1	-1.17	0.00646316	1	Activator of 90 kDa heat shock protein ATPase homolog 1
CCT2	-1.17	0.021001	1	T-complex protein 1 subunit beta
IFT81	-1.18	0.00475041	1	Intraflagellar transport protein 81 homolog
SEPT2	-1.18	0.00918642	1	Septin-2
TTC25	-1.18	0.00313592	1	Tetratricopeptide repeat protein 25
SNRNP200	-1.19	0.0427497	1	U5 small nuclear ribonucleoprotein 200 kDa helicase
CKB	-1.2	0.00782371	1	Creatine kinase B-type
MT-CO1	-1.2	0.0378791	1	Cytochrome c oxidase subunit 1
SLC27A2	-1.2	0.0118877	1	Very long-chain acyl-CoA synthetase
TP53BP1	-1.2	0.00216805	1	Tumor suppressor p53-binding protein 1
AHCY	-1.21	0.0345054	1	Adenosylhomocysteinase
GNB2L1	-1.21	0.0123303	1	Guanine nucleotide-binding protein subunit beta-2-like 1;Guanine nucleotide-binding protein subunit beta-2-like 1, N-terminally processed
PRMT1	-1.21	0.0195649	1	Protein arginine N-methyltransferase 1
FDXR	-1.22	0.000973986	1	NADPH:adrenodoxin oxidoreductase, mitochondrial
SYNCRIP	-1.22	0.0460109	1	Heterogeneous nuclear ribonucleoprotein Q
DDX39B	-1.24	0.00224499	1	Spliceosome RNA helicase DDX39B
PRKDC	-1.25	0.032406	1	DNA-dependent protein kinase catalytic subunit
PTGES3	-1.25	0.0149967	1	Prostaglandin E synthase 3
EIF3M	-1.26	0.00400289	1	Eukaryotic translation initiation factor 3 subunit M
HNRNPR	-1.27	0.00523261	1	Heterogeneous nuclear ribonucleoprotein R
PEBP1	-1.27	0.00552965	1	Phosphatidylethanolamine-binding protein 1;Hippocampal cholinergic neurostimulating peptide
MIPEP	-1.28	0.00961122	1	Mitochondrial intermediate peptidase
MSI2	-1.28	0.00162722	1	RNA-binding protein Musashi homolog 2
DHX9	-1.3	0.0208701	1	ATP-dependent RNA helicase A
CSNK2A1	-1.31	0.015904	1	Casein kinase II subunit alpha;Casein kinase II subunit alpha 3
GPX4	-1.34	0.000770024	1	Phospholipid hydroperoxide glutathione peroxidase, mitochondrial
HSPA4	-1.34	0.00327759	1	Heat shock 70 kDa protein 4
OTUB1	-1.35	0.0176607	1	Ubiquitin thioesterase OTUB1
CTSD	-1.36	0.0118382	1	Cathepsin D;Cathepsin D light chain;Cathepsin D heavy chain
GCLC	-1.37	0.0105814	1	Glutamate--cysteine ligase catalytic subunit
S100A8	-1.38	0.0293899	1	Protein S100-A8;Protein S100-A8, N-terminally processed
IFT172	-1.39	0.00651094	1	Intraflagellar transport protein 172 homolog
CETN2	-1.4	0.0151476	1	Centrin-2
NDUFA8	-1.4	0.00578694	1	NADH dehydrogenase [ubiquinone] 1 alpha subcomplex subunit 8
SMC3	-1.42	0.0196482	1	Structural maintenance of chromosomes protein 3
DNPH1	-1.43	0.000182047	1	2-deoxynucleoside 5-phosphate N-hydrolase 1
GANAB	-1.45	0.0230344	1	Neutral alpha-glucosidase AB
COX6A1	-1.47	0.00103323	1	Cytochrome c oxidase subunit 6A1, mitochondrial
PCM1	-1.47	0.000713978	1	Pericentriolar material 1 protein
C9orf9	-1.48	0.00372776	1	Uncharacterized protein C9orf9
NUCB2	-1.48	0.000286581	1	Nucleobindin-2;Nesfatin-1
NUDC	-1.49	0.00361749	1	Nuclear migration protein nudC
C1orf87	-1.5	0.00132135	1	Uncharacterized protein C1orf87
DBI	-1.5	0.00121381	1	Acyl-CoA-binding protein
MATR3	-1.5	0.00109639	1	Matrin-3
PLEKHA5	-1.52	0.00408706	1	Pleckstrin homology domain-containing family A member 5
FMO3	-1.54	0.000228202	1	Dimethylaniline monooxygenase [N-oxide-forming] 3
FUS	-1.54	0.0067443	1	RNA-binding protein FUS
SPTBN2	-1.54	0.000435931	1	Spectrin beta chain, non-erythrocytic 2
AKR1C3	-1.55	0.00159661	1	Aldo-keto reductase family 1 member C3
COX5A	-1.55	0.00402235	1	Cytochrome c oxidase subunit 5A, mitochondrial
MB	-1.57	0.00814523	1	Myoglobin
BASP1	-1.58	0.00177142	1	Brain acid soluble protein 1
SRSF1	-1.58	0.00162567	1	Serine/arginine-rich splicing factor 1
BCAS1	-1.61	0.0223704	1	Breast carcinoma-amplified sequence 1
PIR	-1.61	0.000396548	1	Pirin
ARL3	-1.63	0.000133944	1	ADP-ribosylation factor-like protein 3
TUBA1C	-1.63	0.000524654	1	Tubulin alpha-1C chain
CROCC	-1.65	0.00276099	1	Rootletin
G6PD	-1.65	0.00483168	1	Glucose-6-phosphate 1-dehydrogenase
ATPIF1	-1.69	0.00733379	1	ATPase inhibitor, mitochondrial
CLIC1	-1.69	0.000740805	1	Chloride intracellular channel protein 1
EPHX1	-1.7	0.00098129	1	Epoxide hydrolase 1
PSMB6	-1.7	0.0103405	1	Proteasome subunit beta type-6
ECHDC1	-1.72	0.000915982	1	Ethylmalonyl-CoA decarboxylase
MAP1A	-1.82	0.00511817	1	Microtubule-associated protein 1A;MAP1A heavy chain;MAP1 light chain LC2
SOD1	-1.86	0.00166538	1	Superoxide dismutase [Cu-Zn]
CCDC151	-1.88	0.000989621	1	Coiled-coil domain-containing protein 151
S100A14	-1.88	0.0155738	1	Protein S100-A14
ANXA8L2	-1.89	0.00235301	1	Annexin A8-like protein 2
IPO4	-1.89	0.00405123	1	Importin-4
CTSH	-1.9	8.19158e-06	1	Pro-cathepsin H;Cathepsin H mini chain;Cathepsin H;Cathepsin H heavy chain;Cathepsin H light chain
NQO1	-1.9	0.000195164	1	NAD(P)H dehydrogenase [quinone] 1
C14orf166	-1.96	0.0141999	1	UPF0568 protein C14orf166
SELENBP1	-2	0.0260014	1	Selenium-binding protein 1
CES1	-2.03	0.0139612	1	Liver carboxylesterase 1
HADH	-2.04	0.00198255	1	Hydroxyacyl-coenzyme A dehydrogenase, mitochondrial
RSPH4A	-2.04	0.00119568	1	Radial spoke head protein 4 homolog A
UGDH	-2.04	1.5633e-05	1	UDP-glucose 6-dehydrogenase
CRIP1	-2.06	0.00229788	1	Cysteine-rich protein 1
PPOX	-2.06	0.0002762	1	Protoporphyrinogen oxidase
KIF21A	-2.07	0.00810763	1	Kinesin-like protein KIF21A
GSTA1	-2.35	0.00179151	1	Glutathione S-transferase A1;Glutathione S-transferase A1, N-terminally processed
APPL2	-2.37	0.000867712	1	DCC-interacting protein 13-beta
SAMHD1	-2.37	3.60111e-05	1	Deoxynucleoside triphosphate triphosphohydrolase SAMHD1
CAPS	-2.41	0.0036144	1	Calcyphosin
AGR3	-2.44	1.46957e-06	1	Anterior gradient protein 3 homolog
EWSR1	-2.46	0.0400335	1	RNA-binding protein EWS
TKT	-2.75	0.0322459	1	Transketolase
ALDH1A1	-2.77	3.55425e-06	1	Retinal dehydrogenase 1
DYNC2H1	-2.96	0.000202664	1	Cytoplasmic dynein 2 heavy chain 1
ALDH3B1	-3.01	0.000152629	1	Aldehyde dehydrogenase family 3 member B1
ALDH3A1	-3.03	6.92916e-06	1	Aldehyde dehydrogenase, dimeric NADP-preferring
METTL7A	-3.09	5.04476e-06	1	Methyltransferase-like protein 7A
ERICH3	-3.17	0.000356492	1	Glutamate-rich protein 3
SPAG6	-3.44	0.00168576	1	Sperm-associated antigen 6
ADH7	-3.49	4.36985e-05	1	Alcohol dehydrogenase class 4 mu/sigma chain
DNAH9	-3.59	3.29391e-07	1	Dynein heavy chain 9, axonemal
SPRR3	-4.29	0.00031489	1	Small proline-rich protein 3
DNAH5	-4.42	1.1288e-06	1	Dynein heavy chain 5, axonemal
ALDH3A2	-5.13	6.72275e-06	1	Fatty aldehyde dehydrogenase

## Sheet: NonCF_HH.vs.NonCF_NN_PAIR 5
NonCF_HH.vs.NonCF_NN [PAIR 5]
Protein	logFC	Pvalue	P.adj	protein_name
NDRG1	5.87	3.78116e-10	5.54e-13	Protein NDRG1
MUC5B	4.18	0.00018563	0.0242	Mucin-5B
P4HA1	3.17	0.000173496	0.0228	Prolyl 4-hydroxylase subunit alpha-1
SLC2A1	3.06	6.50983e-07	3.52e-07	Solute carrier family 2, facilitated glucose transporter member 1
TGM2	3.06	6.97601e-05	0.00743	Protein-glutamine gamma-glutamyltransferase 2
MT1X	2.93	0.000342316	0.0368	Metallothionein-1X
DSP	2.85	0.00123342	0.131	Desmoplakin
VIM	2.79	0.00378464	0.256	Vimentin
TFF3	2.51	1.3167e-06	1.81e-06	Trefoil factor 3
LGALS1	2.36	3.14902e-05	0.00222	Galectin-1
CP	2.23	0.0122053	0.507	Ceruloplasmin
SCGB1A1	2.13	0.0209165	0.625	Uteroglobin
HMGN4	1.96	0.00183982	0.173	High mobility group nucleosome-binding domain-containing protein 4
ARHGDIB	1.93	0.000597427	0.0658	Rho GDP-dissociation inhibitor 2
NUCB1	1.91	0.000806689	0.09	Nucleobindin-1
APOL2	1.88	4.29008e-05	0.00363	Apolipoprotein L2
DPYD	1.87	0.000468531	0.0505	Dihydropyrimidine dehydrogenase [NADP(+)]
FHL2	1.86	0.000981168	0.108	Four and a half LIM domains protein 2
WFDC2	1.77	0.0371669	0.729	WAP four-disulfide core domain protein 2
LGALS3BP	1.72	0.00022036	0.0279	Galectin-3-binding protein
ITGAV	1.68	0.0093128	0.444	Integrin alpha-V;Integrin alpha-V heavy chain;Integrin alpha-V light chain
CNN3	1.6	0.0203468	0.619	Calponin-3
GPD1L	1.59	0.00258026	0.208	Glycerol-3-phosphate dehydrogenase 1-like protein
C3	1.56	0.00326001	0.234	Complement C3;Complement C3 beta chain;C3-beta-c;Complement C3 alpha chain;C3a anaphylatoxin;Acylation stimulating protein;Complement C3b alpha chain;Complement C3c alpha chain fragment 1;Complement C3dg fragment;Complement C3g fragment;Complement C3d fragment;Complement C3f fragment;Complement C3c alpha chain fragment 2
CELSR1	1.5	0.00286094	0.218	Cadherin EGF LAG seven-pass G-type receptor 1
TPM1	1.48	0.0403818	0.742	Tropomyosin alpha-1 chain
PMM2	1.46	0.00103158	0.113	Phosphomannomutase 2
ASPH	1.45	0.000142038	0.0186	Aspartyl/asparaginyl beta-hydroxylase
FSCN1	1.41	0.000289903	0.0336	Fascin
BZW1	1.4	0.00842582	0.42	Basic leucine zipper and W2 domain-containing protein 1
TMED9	1.4	0.0169579	0.581	Transmembrane emp24 domain-containing protein 9
SLC16A1	1.37	0.00329207	0.235	Monocarboxylate transporter 1
KRT19	1.35	0.00596639	0.341	Keratin, type I cytoskeletal 19
TFCP2	1.35	0.00269236	0.212	Alpha-globin transcription factor CP2
MT2A	1.34	0.00646279	0.359	Metallothionein-2
FRMD8	1.33	0.0252372	0.661	FERM domain-containing protein 8
SLC26A2	1.32	0.00137056	0.142	Sulfate transporter
MYDGF	1.31	0.000340373	0.0367	Myeloid-derived growth factor
H3F3A	1.31	0.011344	0.49	Histone H3.3
PFKP	1.31	0.00145082	0.148	ATP-dependent 6-phosphofructokinase, platelet type
BPIFB1	1.29	0.0194141	0.609	BPI fold-containing family B member 1
CAV1	1.29	0.00165347	0.162	Caveolin-1
BSG	1.28	0.000328824	0.0361	Basigin
ITGB6	1.28	0.0101149	0.463	Integrin beta-6
MSN	1.28	0.00385077	0.259	Moesin
RRBP1	1.28	0.00837657	0.419	Ribosome-binding protein 1
CISD1	1.27	0.00530262	0.314	CDGSH iron-sulfur domain-containing protein 1
ZC3H14	1.27	0.00650395	0.36	Zinc finger CCCH domain-containing protein 14
ERO1L	1.24	0.000508268	0.0549	ERO1-like protein alpha
GNAS	1.23	0.00542868	0.319	Guanine nucleotide-binding protein G(s) subunit alpha isoforms XLas
MIF	1.21	0.00244813	0.203	Macrophage migration inhibitory factor
CORO1C	1.2	0.0117925	0.499	Coronin-1C
HIST1H1D	1.2	0.00947324	0.448	Histone H1.3
MUC5AC	1.2	0.0332165	0.711	Mucin-5AC
GLB1	1.19	0.0239588	0.651	Beta-galactosidase
TSPAN6	1.14	0.0323259	0.706	Tetraspanin-6
ACADS	1.12	0.0114622	0.492	Short-chain specific acyl-CoA dehydrogenase, mitochondrial
DSG2	1.1	0.00455707	0.285	Desmoglein-2
ALDH1A3	1.09	0.00323303	0.233	Aldehyde dehydrogenase family 1 member A3
ARHGAP1	1.09	0.0035819	0.248	Rho GTPase-activating protein 1
RPL18A	1.09	0.00878492	0.43	60S ribosomal protein L18a
GFM1	1.07	0.0178155	0.591	Elongation factor G, mitochondrial
PDXDC1	1.07	0.00479973	0.293	Pyridoxal-dependent decarboxylase domain-containing protein 1
TCOF1	1.07	0.0100413	0.462	Treacle protein
FAM49B	1.06	0.0128095	0.518	Protein FAM49B
TXNDC5	1.06	0.00466462	0.288	Thioredoxin domain-containing protein 5
PRDX4	1.05	0.0310187	0.699	Peroxiredoxin-4
MUC16	1.04	0.0163734	0.573	Mucin-16
RBM14	1.04	0.00396462	0.264	RNA-binding protein 14
ROCK2	1.03	0.00250132	0.205	Rho-associated protein kinase 2
FAM114A1	1.02	0.00416176	0.271	Protein NOXP20
NUBP2	1.02	0.0406717	0.743	Cytosolic Fe-S cluster assembly factor NUBP2
BRD4	1.01	0.0454794	0.76	Bromodomain-containing protein 4
GYS1	1.01	0.00627758	0.352	Glycogen [starch] synthase, muscle
PTK2	1.01	0.0222993	0.637	Focal adhesion kinase 1
ALDH1B1	0.996	0.018642	0.601	Aldehyde dehydrogenase X, mitochondrial
TPM4	0.996	0.00523133	0.311	Tropomyosin alpha-4 chain
COG5	0.984	0.0448805	0.758	Conserved oligomeric Golgi complex subunit 5
APMAP	0.982	0.0210948	0.626	Adipocyte plasma membrane-associated protein
CXCL1	0.982	0.0119445	0.502	Growth-regulated alpha protein;GRO-alpha(4-73);GRO-alpha(5-73);GRO-alpha(6-73)
CLTA	0.974	0.0342211	0.716	Clathrin light chain A
H1F0	0.974	0.0122956	0.509	Histone H1.0;Histone H1.0, N-terminally processed
ITGA6	0.968	0.041803	0.748	Integrin alpha-6;Integrin alpha-6 heavy chain;Integrin alpha-6 light chain;Processed integrin alpha-6
ST14	0.968	0.00825621	0.416	Suppressor of tumorigenicity 14 protein
SUN2	0.967	0.0355765	0.722	SUN domain-containing protein 2
EFEMP1	0.962	0.0237165	0.65	EGF-containing fibulin-like extracellular matrix protein 1
RAB21	0.952	0.0162671	0.572	Ras-related protein Rab-21
CD44	0.925	0.0171278	0.583	CD44 antigen
PCK2	0.92	0.0302365	0.695	Phosphoenolpyruvate carboxykinase [GTP], mitochondrial
TPD52L2	0.919	0.00447514	0.282	Tumor protein D54
DHRS1	0.918	0.0234869	0.648	Dehydrogenase/reductase SDR family member 1
STAT2	0.916	0.0427552	0.751	Signal transducer and activator of transcription 2
CPOX	0.906	0.014888	0.552	Oxygen-dependent coproporphyrinogen-III oxidase, mitochondrial
ITGB4	0.898	0.037916	0.733	Integrin beta-4
SLC25A3	0.897	0.0048663	0.296	Phosphate carrier protein, mitochondrial
LAMTOR5	0.895	0.0498775	0.773	Ragulator complex protein LAMTOR5
POF1B	0.881	0.0191613	0.606	Protein POF1B
BDH2	0.879	0.0468844	0.765	3-hydroxybutyrate dehydrogenase type 2
BAG1	0.878	0.0310411	0.699	BAG family molecular chaperone regulator 1
LRPAP1	0.874	0.0289238	0.687	Alpha-2-macroglobulin receptor-associated protein
SERPINH1	0.869	0.0321537	0.705	Serpin H1
CST3	0.868	0.0481458	0.768	Cystatin-C
ANXA5	0.867	0.0189244	0.604	Annexin A5
STIM1	0.866	0.0107347	0.477	Stromal interaction molecule 1
ARFGAP2	0.864	0.0182853	0.597	ADP-ribosylation factor GTPase-activating protein 2
HK2	0.847	0.0301216	0.694	Hexokinase-2
SYNJ2BP	0.847	0.0321721	0.705	Synaptojanin-2-binding protein
BCKDHB	0.833	0.0221449	0.636	2-oxoisovalerate dehydrogenase subunit beta, mitochondrial
MTPN	0.831	0.00739969	0.39	Myotrophin
TMX1	0.817	0.0301133	0.694	Thioredoxin-related transmembrane protein 1
STAU1	0.806	0.0125761	0.514	Double-stranded RNA-binding protein Staufen homolog 1
ANKFY1	0.803	0.0402704	0.742	Rabankyrin-5
DNAI2	0.803	0.0329263	0.709	Dynein intermediate chain 2, axonemal
TP53I11	0.802	0.0404203	0.743	Tumor protein p53-inducible protein 11
FLOT1	0.796	0.0231057	0.644	Flotillin-1
CDKN2A	0.794	0.0252011	0.661	Cyclin-dependent kinase inhibitor 2A;Cyclin-dependent kinase 4 inhibitor B
ALDOA	0.793	0.0171868	0.583	Fructose-bisphosphate aldolase A
VAMP8	0.792	0.0311042	0.7	Vesicle-associated membrane protein 8
VASP	0.781	0.0149484	0.553	Vasodilator-stimulated phosphoprotein
PPP1R13L	0.774	0.0257372	0.665	RelA-associated inhibitor
PREB	0.773	0.0367955	0.728	Prolactin regulatory element-binding protein
ACSF2	0.734	0.0203975	0.619	Acyl-CoA synthetase family member 2, mitochondrial
CKAP4	0.731	0.0252953	0.662	Cytoskeleton-associated protein 4
FAM129A	0.729	0.0464732	0.763	Protein Niban
TMED4	0.727	0.0305403	0.696	Transmembrane emp24 domain-containing protein 4
PGAM1	0.726	0.0275766	0.678	Phosphoglycerate mutase 1;Probable phosphoglycerate mutase 4
NOP58	0.724	0.01156	0.494	Nucleolar protein 58
IGFBP2	0.71	0.0405405	0.743	Insulin-like growth factor-binding protein 2
CRKL	0.702	0.0432821	0.753	Crk-like protein
GNPDA1	0.695	0.0443182	0.756	Glucosamine-6-phosphate isomerase 1
FLNB	0.694	0.0175577	0.588	Filamin-B
PSCA	0.694	0.0341746	0.716	Prostate stem cell antigen
GORASP2	0.682	0.0497441	0.773	Golgi reassembly-stacking protein 2
BPGM	0.667	0.0181671	0.595	Bisphosphoglycerate mutase
TMED10	0.667	0.0167859	0.578	Transmembrane emp24 domain-containing protein 10
PLS1	0.665	0.0492907	0.772	Plastin-1
ENO2	0.658	0.0459631	0.762	Gamma-enolase
KLK11	0.657	0.0392775	0.738	Kallikrein-11;Kallikrein-11 inactive chain 1;Kallikrein-11 inactive chain 2
CALU	0.656	0.0420339	0.749	Calumenin
PGK1	0.566	0.040387	0.742	Phosphoglycerate kinase 1
ACAT1	-0.508	0.0478646	0.768	Acetyl-CoA acetyltransferase, mitochondrial
EIF3A	-0.567	0.0433717	0.753	Eukaryotic translation initiation factor 3 subunit A
DDB1	-0.604	0.0408554	0.744	DNA damage-binding protein 1
EEF1G	-0.615	0.0225359	0.639	Elongation factor 1-gamma
EML2	-0.642	0.0433214	0.753	Echinoderm microtubule-associated protein-like 2
TAGLN2	-0.643	0.0443648	0.757	Transgelin-2
ADSL	-0.645	0.0398229	0.74	Adenylosuccinate lyase
HNRNPK	-0.645	0.0241383	0.653	Heterogeneous nuclear ribonucleoprotein K
RPS9	-0.645	0.0381114	0.733	40S ribosomal protein S9
A2ML1	-0.685	0.0383588	0.734	Alpha-2-macroglobulin-like protein 1
TMED7	-0.69	0.0296106	0.691	Transmembrane emp24 domain-containing protein 7
QARS	-0.701	0.0254711	0.663	Glutamine--tRNA ligase
PRMT5	-0.716	0.0252505	0.662	Protein arginine N-methyltransferase 5;Protein arginine N-methyltransferase 5, N-terminally processed
CYB5R1	-0.717	0.0244789	0.656	NADH-cytochrome b5 reductase 1
FH	-0.721	0.0138971	0.537	Fumarate hydratase, mitochondrial
RPL32	-0.721	0.0240623	0.652	60S ribosomal protein L32
DDX5	-0.731	0.0255564	0.664	Probable ATP-dependent RNA helicase DDX5
WARS	-0.731	0.0483667	0.769	Tryptophan--tRNA ligase, cytoplasmic;T1-TrpRS;T2-TrpRS
ATP5C1	-0.732	0.0461186	0.762	ATP synthase subunit gamma, mitochondrial
CHORDC1	-0.733	0.0230315	0.644	Cysteine and histidine-rich domain-containing protein 1
RCC1	-0.738	0.0216894	0.632	Regulator of chromosome condensation
NCCRP1	-0.749	0.0298718	0.692	F-box only protein 50
DHX15	-0.751	0.0306285	0.697	Pre-mRNA-splicing factor ATP-dependent RNA helicase DHX15
TAF15	-0.752	0.0366357	0.727	TATA-binding protein-associated factor 2N
HIBADH	-0.755	0.0232909	0.646	3-hydroxyisobutyrate dehydrogenase, mitochondrial
TRIM29	-0.76	0.0265511	0.671	Tripartite motif-containing protein 29
CYP2S1	-0.761	0.0387746	0.736	Cytochrome P450 2S1
SCPEP1	-0.761	0.039408	0.739	Retinoid-inducible serine carboxypeptidase
RPL22	-0.762	0.0267626	0.672	60S ribosomal protein L22
ARMC4	-0.768	0.0235386	0.648	Armadillo repeat-containing protein 4
ABHD10	-0.77	0.0498665	0.773	Mycophenolic acid acyl-glucuronide esterase, mitochondrial
FDXR	-0.772	0.0198217	0.614	NADPH:adrenodoxin oxidoreductase, mitochondrial
PTRH2	-0.772	0.04991	0.773	Peptidyl-tRNA hydrolase 2, mitochondrial
RPL7A	-0.773	0.0380169	0.733	60S ribosomal protein L7a
ADD1	-0.778	0.0336638	0.713	Alpha-adducin
DDX42	-0.781	0.0348226	0.719	ATP-dependent RNA helicase DDX42
HYPK	-0.788	0.01589	0.566	Huntingtin-interacting protein K
SPEF1	-0.789	0.029867	0.692	Sperm flagellar protein 1
THYN1	-0.796	0.0497737	0.773	Thymocyte nuclear protein 1
C1QBP	-0.809	0.0254758	0.663	Complement component 1 Q subcomponent-binding protein, mitochondrial
RPL30	-0.816	0.0428497	0.751	60S ribosomal protein L30
IDE	-0.818	0.0218129	0.633	Insulin-degrading enzyme
SCP2	-0.83	0.00779333	0.402	Non-specific lipid-transfer protein
BPNT1	-0.834	0.0290014	0.687	3(2),5-bisphosphate nucleotidase 1
ARPC3	-0.857	0.0464174	0.763	Actin-related protein 2/3 complex subunit 3
DDX3X	-0.858	0.0268163	0.673	ATP-dependent RNA helicase DDX3X
DKC1	-0.862	0.0226434	0.64	H/ACA ribonucleoprotein complex subunit 4
SMU1	-0.867	0.0191482	0.606	WD40 repeat-containing protein SMU1;WD40 repeat-containing protein SMU1, N-terminally processed
MLLT4	-0.87	0.0188732	0.603	Afadin
VPS28	-0.87	0.0262264	0.669	Vacuolar protein sorting-associated protein 28 homolog
CD9	-0.876	0.0141346	0.54	CD9 antigen
GFM2	-0.876	0.0417126	0.747	Ribosome-releasing factor 2, mitochondrial
TRAP1	-0.876	0.0196637	0.612	Heat shock protein 75 kDa, mitochondrial
CLIC1	-0.882	0.0413982	0.746	Chloride intracellular channel protein 1
COPZ1	-0.884	0.0202337	0.618	Coatomer subunit zeta-1
PSME1	-0.884	0.00458525	0.286	Proteasome activator complex subunit 1
CSNK2B	-0.889	0.0231006	0.644	Casein kinase II subunit beta
AKR1B1	-0.89	0.0343683	0.717	Aldose reductase
LRBA	-0.89	0.00647122	0.359	Lipopolysaccharide-responsive and beige-like anchor protein
XRCC1	-0.892	0.0150863	0.555	DNA repair protein XRCC1
NFX1	-0.901	0.0493289	0.772	Transcriptional repressor NF-X1
NME7	-0.903	0.015557	0.562	Nucleoside diphosphate kinase 7
MARS	-0.906	0.0104585	0.471	Methionine--tRNA ligase, cytoplasmic
NPC2	-0.915	0.0370643	0.729	Epididymal secretory protein E1
SUGT1	-0.915	0.0101813	0.465	Suppressor of G2 allele of SKP1 homolog
GPX4	-0.916	0.0108126	0.479	Phospholipid hydroperoxide glutathione peroxidase, mitochondrial
COPS6	-0.926	0.012373	0.51	COP9 signalosome complex subunit 6
GBP6	-0.928	0.0356444	0.723	Guanylate-binding protein 6
UQCRFS1	-0.946	0.0319123	0.704	Cytochrome b-c1 complex subunit Rieske, mitochondrial;Cytochrome b-c1 complex subunit 11;Putative cytochrome b-c1 complex subunit Rieske-like protein 1
AP1G1	-0.947	0.0162055	0.571	AP-1 complex subunit gamma-1
DYNLT1	-0.947	0.0164589	0.574	Dynein light chain Tctex-type 1
RARS	-0.95	0.00334446	0.237	Arginine--tRNA ligase, cytoplasmic
GLUL	-0.952	0.0333382	0.711	Glutamine synthetase
PSMA5	-0.953	0.00539373	0.318	Proteasome subunit alpha type-5
SLC25A10	-0.96	0.0230889	0.644	Mitochondrial dicarboxylate carrier
SNX18	-0.96	0.0100285	0.461	Sorting nexin-18
ABLIM1	-0.961	0.00639615	0.356	Actin-binding LIM protein 1
GNB2L1	-0.961	0.0380199	0.733	Guanine nucleotide-binding protein subunit beta-2-like 1;Guanine nucleotide-binding protein subunit beta-2-like 1, N-terminally processed
DNAJB1	-0.966	0.0482482	0.769	DnaJ homolog subfamily B member 1
SNW1	-0.967	0.0355112	0.722	SNW domain-containing protein 1
NUCB2	-0.968	0.00718566	0.383	Nucleobindin-2;Nesfatin-1
DBI	-0.971	0.019806	0.613	Acyl-CoA-binding protein
ARF6	-0.974	0.0262406	0.669	ADP-ribosylation factor 6
BTF3	-0.974	0.0200648	0.616	Transcription factor BTF3
MPP7	-0.976	0.0346446	0.718	MAGUK p55 subfamily member 7
MX1	-0.977	0.0260749	0.668	Interferon-induced GTP-binding protein Mx1;Interferon-induced GTP-binding protein Mx1, N-terminally processed
IFT46	-0.98	0.0197204	0.612	Intraflagellar transport protein 46 homolog
VAPA	-0.98	0.0131516	0.524	Vesicle-associated membrane protein-associated protein A
CYB5B	-0.983	0.0153754	0.559	Cytochrome b5 type B
AKR1C3	-0.985	0.0260383	0.667	Aldo-keto reductase family 1 member C3
IFT74	-0.988	0.0337848	0.714	Intraflagellar transport protein 74 homolog
HIP1R	-0.997	0.00582927	0.335	Huntingtin-interacting protein 1-related protein
RSPH1	-0.999	0.00508116	0.305	Radial spoke head 1 homolog
COG3	-1	0.0239529	0.651	Conserved oligomeric Golgi complex subunit 3
NUP188	-1	0.0481525	0.768	Nucleoporin NUP188 homolog
CCDC181	-1.01	0.0116276	0.496	Coiled-coil domain-containing protein 181
LLGL2	-1.01	0.00542293	0.319	Lethal(2) giant larvae protein homolog 2
MTCH2	-1.01	0.00235682	0.199	Mitochondrial carrier homolog 2
PABPC4	-1.01	0.0223183	0.638	Polyadenylate-binding protein 4
XPNPEP3	-1.01	0.0261684	0.668	Probable Xaa-Pro aminopeptidase 3
EIF3B	-1.02	0.0206826	0.622	Eukaryotic translation initiation factor 3 subunit B
GRIPAP1	-1.03	0.0178408	0.591	GRIP1-associated protein 1
PTGES3	-1.03	0.037847	0.732	Prostaglandin E synthase 3
AHSA1	-1.04	0.0132993	0.527	Activator of 90 kDa heat shock protein ATPase homolog 1
LRRC46	-1.04	0.0236184	0.649	Leucine-rich repeat-containing protein 46
SPATA18	-1.04	0.00523698	0.312	Mitochondria-eating protein
TP53BP1	-1.04	0.00577013	0.333	Tumor suppressor p53-binding protein 1
SEC13	-1.05	0.0142562	0.542	Protein SEC13 homolog
ACAT2	-1.06	0.00531805	0.315	Acetyl-CoA acetyltransferase, cytosolic
GTF2I	-1.06	0.0336158	0.713	General transcription factor II-I
MAP2K2	-1.06	0.0160708	0.569	Dual specificity mitogen-activated protein kinase kinase 2
PRMT1	-1.06	0.0360101	0.724	Protein arginine N-methyltransferase 1
PYCARD	-1.06	0.0267425	0.672	Apoptosis-associated speck-like protein containing a CARD
CYC1	-1.07	0.0141753	0.541	Cytochrome c1, heme protein, mitochondrial
NDRG2	-1.07	0.00560253	0.326	Protein NDRG2
C14orf159	-1.08	0.00369174	0.253	UPF0317 protein C14orf159, mitochondrial
RPL9	-1.08	0.00570914	0.331	60S ribosomal protein L9
ACTR1A	-1.1	0.0109917	0.483	Alpha-centractin
HAGH	-1.1	0.00334569	0.238	Hydroxyacylglutathione hydrolase, mitochondrial
MATR3	-1.1	0.00931147	0.444	Matrin-3
SMPD2	-1.1	0.0134945	0.53	Sphingomyelin phosphodiesterase 2
UBTF	-1.1	0.00583001	0.335	Nucleolar transcription factor 1
CPT1A	-1.11	0.0119971	0.503	Carnitine O-palmitoyltransferase 1, liver isoform
MACROD1	-1.11	0.0135675	0.531	O-acetyl-ADP-ribose deacetylase MACROD1
STARD10	-1.11	0.00623387	0.35	PCTP-like protein
CTBP1	-1.12	0.0307905	0.698	C-terminal-binding protein 1
EIF3F	-1.12	0.0123741	0.51	Eukaryotic translation initiation factor 3 subunit F
GOT2	-1.12	0.0306417	0.697	Aspartate aminotransferase, mitochondrial
PSMC1	-1.12	0.00380834	0.257	26S protease regulatory subunit 4
AGR3	-1.13	0.00230784	0.197	Anterior gradient protein 3 homolog
B2M	-1.13	0.00410543	0.269	Beta-2-microglobulin;Beta-2-microglobulin form pI 5.3
FMO3	-1.13	0.00293008	0.221	Dimethylaniline monooxygenase [N-oxide-forming] 3
MSI2	-1.13	0.00402847	0.266	RNA-binding protein Musashi homolog 2
C11orf54	-1.15	0.00748637	0.393	Ester hydrolase C11orf54
CKMT1A	-1.15	0.0240154	0.652	Creatine kinase U-type, mitochondrial
TPP2	-1.15	0.033193	0.711	Tripeptidyl-peptidase 2
ARPC2	-1.17	0.00767706	0.399	Actin-related protein 2/3 complex subunit 2
HDAC1	-1.17	0.00968523	0.453	Histone deacetylase 1
NT5C	-1.17	0.0122117	0.507	5(3)-deoxyribonucleotidase, cytosolic type
RTCA	-1.18	0.00285023	0.218	RNA 3-terminal phosphate cyclase
CROCC	-1.19	0.0204519	0.62	Rootletin
HADH	-1.19	0.0430247	0.752	Hydroxyacyl-coenzyme A dehydrogenase, mitochondrial
SAMM50	-1.19	0.0291519	0.688	Sorting and assembly machinery component 50 homolog
CYCS	-1.2	0.0159687	0.567	Cytochrome c
CSNK2A1	-1.21	0.0239587	0.651	Casein kinase II subunit alpha;Casein kinase II subunit alpha 3
ARL3	-1.22	0.00159945	0.158	ADP-ribosylation factor-like protein 3
UGDH	-1.22	0.00171089	0.165	UDP-glucose 6-dehydrogenase
HSPBP1	-1.23	0.00481033	0.293	Hsp70-binding protein 1
CFAP20	-1.24	0.0117527	0.498	Cilia- and flagella-associated protein 20
RTN4	-1.24	0.0128289	0.518	Reticulon-4
ARHGAP18	-1.25	0.00240267	0.201	Rho GTPase-activating protein 18
DNAJB13	-1.25	0.00242433	0.202	DnaJ homolog subfamily B member 13
PSMD11	-1.25	0.00287429	0.219	26S proteasome non-ATPase regulatory subunit 11
PTRHD1	-1.25	0.00256151	0.207	Putative peptidyl-tRNA hydrolase PTRHD1
RSPH4A	-1.26	0.0254311	0.663	Radial spoke head protein 4 homolog A
SNRNP200	-1.26	0.0330924	0.71	U5 small nuclear ribonucleoprotein 200 kDa helicase
CPT2	-1.27	0.00483863	0.294	Carnitine O-palmitoyltransferase 2, mitochondrial
ILF2	-1.27	0.000518252	0.056	Interleukin enhancer-binding factor 2
PEBP1	-1.29	0.00500169	0.302	Phosphatidylethanolamine-binding protein 1;Hippocampal cholinergic neurostimulating peptide
VDAC3	-1.29	0.0068489	0.372	Voltage-dependent anion-selective channel protein 3
CHMP5	-1.33	0.0362229	0.725	Charged multivesicular body protein 5
MIPEP	-1.34	0.00721465	0.384	Mitochondrial intermediate peptidase
EVPL	-1.35	0.00420021	0.272	Envoplakin
PPP2CA	-1.35	0.013039	0.522	Serine/threonine-protein phosphatase 2A catalytic subunit alpha isoform
MAP1A	-1.36	0.0268145	0.673	Microtubule-associated protein 1A;MAP1A heavy chain;MAP1 light chain LC2
ALDH16A1	-1.37	0.00151302	0.152	Aldehyde dehydrogenase family 16 member A1
HSD17B12	-1.37	0.00346198	0.243	Very-long-chain 3-oxoacyl-CoA reductase
AK7	-1.38	0.00231144	0.197	Adenylate kinase 7
ALDH3B1	-1.38	0.0329088	0.709	Aldehyde dehydrogenase family 3 member B1
IMPDH2	-1.38	0.00566337	0.329	Inosine-5-monophosphate dehydrogenase 2
DNAI1	-1.39	0.00165913	0.162	Dynein intermediate chain 1, axonemal
TTLL12	-1.39	0.00127708	0.135	Tubulin--tyrosine ligase-like protein 12
APRT	-1.41	0.00431843	0.277	Adenine phosphoribosyltransferase
COX5A	-1.42	0.00697129	0.376	Cytochrome c oxidase subunit 5A, mitochondrial
FBXW9	-1.42	0.0033478	0.238	F-box/WD repeat-containing protein 9
DNAH11	-1.44	0.00290115	0.22	Dynein heavy chain 11, axonemal
PIR	-1.44	0.00100647	0.111	Pirin
COX6A1	-1.45	0.00109734	0.119	Cytochrome c oxidase subunit 6A1, mitochondrial
EPHX1	-1.46	0.00304093	0.226	Epoxide hydrolase 1
GSR	-1.47	0.00268747	0.212	Glutathione reductase, mitochondrial
ARF1	-1.48	0.000942679	0.104	ADP-ribosylation factor 1;ADP-ribosylation factor 3
SAMHD1	-1.49	0.00216055	0.19	Deoxynucleoside triphosphate triphosphohydrolase SAMHD1
G3BP1	-1.5	0.00147532	0.15	Ras GTPase-activating protein-binding protein 1
MCTS1	-1.5	0.00235329	0.199	Malignant T-cell-amplified sequence 1
RSPH9	-1.51	0.00108613	0.118	Radial spoke head protein 9 homolog
SPAG1	-1.52	0.00154684	0.155	Sperm-associated antigen 1
C1orf87	-1.53	0.00112637	0.122	Uncharacterized protein C1orf87
G6PD	-1.53	0.00794271	0.407	Glucose-6-phosphate 1-dehydrogenase
DNAL1	-1.54	0.00195276	0.179	Dynein light chain 1, axonemal
RBM3	-1.56	0.000234774	0.0293	RNA-binding protein 3
UFM1	-1.56	0.000319364	0.0355	Ubiquitin-fold modifier 1
GLIPR2	-1.56	0.0110487	0.484	Golgi-associated plant pathogenesis-related protein 1
ECHDC1	-1.57	0.00189117	0.176	Ethylmalonyl-CoA decarboxylase
PCM1	-1.59	0.000359122	0.0376	Pericentriolar material 1 protein
FAM98B	-1.6	0.00754899	0.395	Protein FAM98B
MT-CO1	-1.61	0.00849546	0.422	Cytochrome c oxidase subunit 1
XPO1	-1.61	0.0165355	0.575	Exportin-1
PPOX	-1.62	0.0019684	0.18	Protoporphyrinogen oxidase
SPTBN2	-1.63	0.000265705	0.0319	Spectrin beta chain, non-erythrocytic 2
ME2	-1.67	0.0135557	0.531	NAD-dependent malic enzyme, mitochondrial
C14orf166	-1.68	0.0302798	0.695	UPF0568 protein C14orf166
PSME2	-1.71	0.000392036	0.0416	Proteasome activator complex subunit 2
S100A8	-1.72	0.00927203	0.443	Protein S100-A8;Protein S100-A8, N-terminally processed
PLEKHA5	-1.73	0.00166189	0.162	Pleckstrin homology domain-containing family A member 5
IFT81	-1.76	0.000202625	0.0261	Intraflagellar transport protein 81 homolog
GSTO1	-1.8	0.0402188	0.742	Glutathione S-transferase omega-1
DHX9	-1.82	0.00263318	0.21	ATP-dependent RNA helicase A
DNPH1	-1.84	1.52516e-05	0.000547	2-deoxynucleoside 5-phosphate N-hydrolase 1
EIF3M	-1.87	0.000163215	0.0215	Eukaryotic translation initiation factor 3 subunit M
APPL2	-1.88	0.00473531	0.291	DCC-interacting protein 13-beta
ABHD11	-1.89	0.000239707	0.0297	Alpha/beta hydrolase domain-containing protein 11
MT-CO2	-1.9	0.00230016	0.197	Cytochrome c oxidase subunit 2
TTC25	-1.92	4.63946e-05	0.00405	Tetratricopeptide repeat protein 25
SLC25A6	-1.92	0.000886971	0.0985	ADP/ATP translocase 3;ADP/ATP translocase 3, N-terminally processed
SLC27A2	-1.97	0.000309954	0.0349	Very long-chain acyl-CoA synthetase
CES1	-1.97	0.0167102	0.577	Liver carboxylesterase 1
IFT172	-2.05	0.000351378	0.0373	Intraflagellar transport protein 172 homolog
SPRR1A	-2.08	0.000219934	0.0279	Cornifin-A
CTSH	-2.12	2.34468e-06	8.27e-06	Pro-cathepsin H;Cathepsin H mini chain;Cathepsin H;Cathepsin H heavy chain;Cathepsin H light chain
S100A14	-2.18	0.00660541	0.364	Protein S100-A14
CCDC151	-2.21	0.000241992	0.0299	Coiled-coil domain-containing protein 151
PSMB6	-2.21	0.00177242	0.169	Proteasome subunit beta type-6
METTL7A	-2.24	0.000137893	0.018	Methyltransferase-like protein 7A
ALDH3A1	-2.29	0.000122433	0.0157	Aldehyde dehydrogenase, dimeric NADP-preferring
ANXA8L2	-2.4	0.00034529	0.0369	Annexin A8-like protein 2
ALDH1A1	-2.42	1.53805e-05	0.000553	Retinal dehydrogenase 1
KIF21A	-2.47	0.00244475	0.203	Kinesin-like protein KIF21A
IPO4	-2.48	0.000490789	0.053	Importin-4
DYNC2H1	-2.51	0.000856845	0.0954	Cytoplasmic dynein 2 heavy chain 1
NQO1	-2.54	1.08513e-05	0.000313	NAD(P)H dehydrogenase [quinone] 1
ERICH3	-2.68	0.00142201	0.146	Glutamate-rich protein 3
GSTA1	-2.92	0.000297894	0.0342	Glutathione S-transferase A1;Glutathione S-transferase A1, N-terminally processed
DNAH5	-2.97	7.77635e-05	0.00854	Dynein heavy chain 5, axonemal
DNAH9	-3.24	1.08772e-06	1.31e-06	Dynein heavy chain 9, axonemal
ADH7	-3.29	8.0265e-05	0.00888	Alcohol dehydrogenase class 4 mu/sigma chain
SPRR3	-4.24	0.000344811	0.0369	Small proline-rich protein 3
ALDH3A2	-5.19	5.86152e-06	8.33e-05	Fatty aldehyde dehydrogenase

## Sheet: CF_HN.vs.CF_NN_PAIR 1
CF_HN.vs.CF_NN [PAIR 1]
Protein	logFC	Pvalue	P.adj	protein_name
DNAAF1	0.5	0.0302755	0.00601	Dynein assembly factor 1, axonemal
PPM1H	0.397	0.036876	0.0104	Protein phosphatase 1H
TEKT1	0.393	0.016883	0.00218	Tektin-1
DDRGK1	0.346	0.0218148	0.00317	DDRGK domain-containing protein 1
RUFY1	-0.289	0.0407781	0.013	RUN and FYVE domain-containing protein 1
STOM	-0.451	0.0276845	0.00527	Erythrocyte band 7 integral membrane protein

## Sheet: CF_HH.vs.CF_NH_PAIR 2
CF_HH.vs.CF_NH [PAIR 2]
Protein	logFC	Pvalue	P.adj	protein_name
ERICH3	1.9	0.027539	0.791	Glutamate-rich protein 3
ALDH1A1	1.88	0.0309485	0.811	Retinal dehydrogenase 1
DNAH5	1.56	0.00624681	0.564	Dynein heavy chain 5, axonemal
CROCC	1.29	0.015301	0.686	Rootletin
TXNRD1	1.25	0.00980007	0.621	Thioredoxin reductase 1, cytoplasmic
AGR3	1.23	0.0178206	0.706	Anterior gradient protein 3 homolog
EWSR1	1.17	0.00464444	0.555	RNA-binding protein EWS
DDB1	1.13	0.00272109	0.528	DNA damage-binding protein 1
TOMM70A	1.1	0.00323884	0.538	Mitochondrial import receptor subunit TOM70
PPOX	1.08	0.006062	0.563	Protoporphyrinogen oxidase
DYNC2H1	1.04	0.0174061	0.702	Cytoplasmic dynein 2 heavy chain 1
ST13	1.02	0.0279263	0.793	Hsc70-interacting protein;Putative protein FAM10A4;Putative protein FAM10A5
RSPH4A	1.01	0.00519407	0.558	Radial spoke head protein 4 homolog A
CETN2	0.992	0.00588397	0.562	Centrin-2
SAMHD1	0.962	0.02853	0.797	Deoxynucleoside triphosphate triphosphohydrolase SAMHD1
MAP1A	0.908	0.0141193	0.676	Microtubule-associated protein 1A;MAP1A heavy chain;MAP1 light chain LC2
ATPIF1	0.89	0.0146639	0.681	ATPase inhibitor, mitochondrial
SYNE1	0.85	0.0437069	0.863	Nesprin-1
SLC2A1	0.814	0.0100401	0.624	Solute carrier family 2, facilitated glucose transporter member 1
AP1G1	0.762	0.00370233	0.545	AP-1 complex subunit gamma-1
AHSA1	0.753	0.0281097	0.794	Activator of 90 kDa heat shock protein ATPase homolog 1
GFM2	0.751	0.00810043	0.598	Ribosome-releasing factor 2, mitochondrial
H2AFV	0.747	0.0447168	0.866	Histone H2A.V;Histone H2A.Z
FUS	0.736	0.00717501	0.582	RNA-binding protein FUS
PROM1	0.715	0.0265904	0.785	Prominin-1
HMGB2	0.683	0.0437969	0.863	High mobility group protein B2
DYNLL1	0.642	0.0348264	0.83	Dynein light chain 1, cytoplasmic
CMPK1	0.633	0.0111457	0.641	UMP-CMP kinase
SMC3	0.632	0.0171689	0.7	Structural maintenance of chromosomes protein 3
SUGT1	0.631	0.0301349	0.807	Suppressor of G2 allele of SKP1 homolog
LMNB1	0.618	0.00887095	0.61	Lamin-B1
UBA6	0.618	0.0422985	0.858	Ubiquitin-like modifier-activating enzyme 6
PHB2	0.605	0.0172063	0.701	Prohibitin-2
PAPSS2	0.602	0.00028829	0.176	Bifunctional 3-phosphoadenosine 5-phosphosulfate synthase 2;Sulfate adenylyltransferase;Adenylyl-sulfate kinase
GALM	0.567	0.00881864	0.609	Aldose 1-epimerase
P4HA1	0.564	0.00700431	0.578	Prolyl 4-hydroxylase subunit alpha-1
PPID	0.548	0.0263336	0.783	Peptidyl-prolyl cis-trans isomerase D
TMPO	0.545	0.0165078	0.696	Lamina-associated polypeptide 2, isoform alpha;Thymopoietin;Thymopentin
ME2	0.536	0.0188917	0.719	NAD-dependent malic enzyme, mitochondrial
EPCAM	0.527	0.00469069	0.555	Epithelial cell adhesion molecule
NUDC	0.519	0.0302425	0.807	Nuclear migration protein nudC
SND1	0.486	0.0451811	0.867	Staphylococcal nuclease domain-containing protein 1
C19orf43	0.48	0.0330459	0.822	Uncharacterized protein C19orf43
GBAS	0.475	0.00924176	0.614	Protein NipSnap homolog 2
SF3B1	0.469	0.030591	0.809	Splicing factor 3B subunit 1
TMC4	0.466	0.00515715	0.558	Transmembrane channel-like protein 4
PSMC6	0.462	0.0136336	0.671	26S protease regulatory subunit 10B
TRAF3IP1	0.439	0.0308546	0.811	TRAF3-interacting protein 1
RTCA	0.427	0.00607758	0.563	RNA 3-terminal phosphate cyclase
FDXR	0.419	0.0431908	0.861	NADPH:adrenodoxin oxidoreductase, mitochondrial
PRPF8	0.414	0.0260285	0.781	Pre-mRNA-processing-splicing factor 8
MATR3	0.413	0.0201831	0.733	Matrin-3
PQBP1	0.4	0.00429752	0.552	Polyglutamine-binding protein 1
ARMC10	0.385	0.0163771	0.695	Armadillo repeat-containing protein 10
MYO1D	0.359	0.0389299	0.847	Unconventional myosin-Id
SSB	0.353	0.0212853	0.744	Lupus La protein
PRPF40A	0.342	0.0434166	0.862	Pre-mRNA-processing factor 40 homolog A
SDHA	0.33	0.00638193	0.564	Succinate dehydrogenase [ubiquinone] flavoprotein subunit, mitochondrial
TCP1	0.291	0.0437692	0.863	T-complex protein 1 subunit alpha
ROCK1	0.267	0.0216741	0.747	Rho-associated protein kinase 1
PLXNB2	-0.277	0.0316407	0.815	Plexin-B2
GUK1	-0.281	0.0283411	0.796	Guanylate kinase
RPL12	-0.307	0.0207991	0.739	60S ribosomal protein L12
SCPEP1	-0.349	0.0430242	0.861	Retinoid-inducible serine carboxypeptidase
FARSB	-0.352	0.0393653	0.849	Phenylalanine--tRNA ligase beta subunit
UBQLN2	-0.361	0.0302053	0.807	Ubiquilin-2
AP1S1	-0.37	0.0409297	0.854	AP-1 complex subunit sigma-1A
SELH	-0.376	0.0270627	0.788	Selenoprotein H
SNX3	-0.383	0.00547545	0.56	Sorting nexin-3
ACAP2	-0.394	0.0243773	0.769	Arf-GAP with coiled-coil, ANK repeat and PH domain-containing protein 2
DBT	-0.396	0.0470932	0.872	Lipoamide acyltransferase component of branched-chain alpha-keto acid dehydrogenase complex, mitochondrial
GNB1	-0.407	0.0451586	0.867	Guanine nucleotide-binding protein G(I)/G(S)/G(T) subunit beta-1
SEPT11	-0.408	0.016895	0.699	Septin-11
AIMP2	-0.418	0.0474726	0.873	Aminoacyl tRNA synthase complex-interacting multifunctional protein 2
PKP3	-0.42	0.022077	0.751	Plakophilin-3
PDLIM5	-0.423	0.0193688	0.724	PDZ and LIM domain protein 5
VAT1	-0.441	0.0433006	0.862	Synaptic vesicle membrane protein VAT-1 homolog
ANXA4	-0.442	0.0497318	0.879	Annexin A4
FLNA	-0.444	0.04847	0.876	Filamin-A
BOLA2	-0.445	0.0171419	0.7	BolA-like protein 2
SLC3A2	-0.448	0.0245404	0.771	4F2 cell-surface antigen heavy chain
MYO1C	-0.451	0.0360347	0.836	Unconventional myosin-Ic
ASNA1	-0.454	0.0470874	0.872	ATPase ASNA1
HEBP2	-0.455	0.036344	0.837	Heme-binding protein 2
BID	-0.464	0.0278905	0.793	BH3-interacting domain death agonist;BH3-interacting domain death agonist p15;BH3-interacting domain death agonist p13;BH3-interacting domain death agonist p11
MYO18A	-0.465	0.029105	0.8	Unconventional myosin-XVIIIa
MAPRE1	-0.475	0.0174255	0.702	Microtubule-associated protein RP/EB family member 1
TUBB	-0.486	0.0119875	0.652	Tubulin beta chain
SEC22B	-0.491	0.0429242	0.86	Vesicle-trafficking protein SEC22b
DRG2	-0.494	0.0499567	0.879	Developmentally-regulated GTP-binding protein 2
RMDN3	-0.501	0.0205685	0.737	Regulator of microtubule dynamics protein 3
STK24	-0.502	0.00908458	0.612	Serine/threonine-protein kinase 24;Serine/threonine-protein kinase 24 36 kDa subunit;Serine/threonine-protein kinase 24 12 kDa subunit
IRGQ	-0.507	0.0273523	0.789	Immunity-related GTPase family Q protein
CAPZA1	-0.512	0.0159586	0.692	F-actin-capping protein subunit alpha-1
ERBB2	-0.513	0.010178	0.625	Receptor tyrosine-protein kinase erbB-2
UPK1B	-0.513	0.014685	0.681	Uroplakin-1b
ANXA3	-0.515	0.0125336	0.659	Annexin A3
GALK1	-0.522	0.0421101	0.858	Galactokinase
VASP	-0.526	0.0348933	0.831	Vasodilator-stimulated phosphoprotein
BPGM	-0.529	0.0241465	0.768	Bisphosphoglycerate mutase
TPM1	-0.538	0.0438529	0.863	Tropomyosin alpha-1 chain
PALLD	-0.556	0.00396102	0.548	Palladin
SH3BGRL3	-0.565	0.0257153	0.779	SH3 domain-binding glutamic acid-rich-like protein 3
PHPT1	-0.573	0.0126015	0.66	14 kDa phosphohistidine phosphatase
PMM2	-0.622	0.00467912	0.555	Phosphomannomutase 2
CAPZA2	-0.633	0.0230008	0.759	F-actin-capping protein subunit alpha-2
VPS29	-0.634	0.0387999	0.847	Vacuolar protein sorting-associated protein 29
GLTP	-0.653	0.0491482	0.877	Glycolipid transfer protein
ACAA1	-0.683	0.0230943	0.759	3-ketoacyl-CoA thiolase, peroxisomal
SLC12A2	-0.712	0.0254488	0.777	Solute carrier family 12 member 2
ALDH1A3	-0.719	0.0053145	0.559	Aldehyde dehydrogenase family 1 member A3
FHL2	-0.744	0.0249455	0.774	Four and a half LIM domains protein 2
PPA1	-0.746	0.0319557	0.817	Inorganic pyrophosphatase
TXNDC17	-0.753	0.00330279	0.539	Thioredoxin domain-containing protein 17
LGALS7	-0.773	0.0116673	0.648	Galectin-7
GLUL	-0.907	0.00822224	0.6	Glutamine synthetase
SPRR1B	-0.936	0.0256895	0.779	Cornifin-B
LAD1	-1.1	0.0162319	0.694	Ladinin-1
ACTB	-1.38	0.040794	0.854	Actin, cytoplasmic 1;Actin, cytoplasmic 1, N-terminally processed

## Sheet: CF_HH.vs.CF_HN_PAIR 3
CF_HH.vs.CF_HN [PAIR 3]
Protein	logFC	Pvalue	P.adj	protein_name
NDRG1	6.73	6.5658e-22	5.4e-13	Protein NDRG1
MUC5B	4.59	2.78231e-08	0.0157	Mucin-5B
DPYD	2.22	2.98009e-08	0.0164	Dihydropyrimidine dehydrogenase [NADP(+)]
PACSIN2	2.15	2.46805e-06	0.256	Protein kinase C and casein kinase substrate in neurons protein 2
LOXL4	2.09	3.98215e-10	0.000504	Lysyl oxidase homolog 4
MT1X	2.07	0.00765342	0.963	Metallothionein-1X
P4HA1	2.06	6.25655e-12	5.7e-06	Prolyl 4-hydroxylase subunit alpha-1
PRPF38B	2.04	0.00226722	0.938	Pre-mRNA-splicing factor 38B
ACTB	1.99	0.00417328	0.952	Actin, cytoplasmic 1;Actin, cytoplasmic 1, N-terminally processed
LGALS1	1.98	0.00037194	0.862	Galectin-1
FSCN1	1.96	4.80122e-09	0.00425	Fascin
VIM	1.92	0.00966659	0.967	Vimentin
MT2A	1.74	1.87047e-05	0.549	Metallothionein-2
TGM2	1.58	0.0189756	0.975	Protein-glutamine gamma-glutamyltransferase 2
CP	1.55	0.0418136	0.982	Ceruloplasmin
C3	1.45	0.0250793	0.978	Complement C3;Complement C3 beta chain;C3-beta-c;Complement C3 alpha chain;C3a anaphylatoxin;Acylation stimulating protein;Complement C3b alpha chain;Complement C3c alpha chain fragment 1;Complement C3dg fragment;Complement C3g fragment;Complement C3d fragment;Complement C3f fragment;Complement C3c alpha chain fragment 2
HMGN3	1.43	0.00111999	0.915	High mobility group nucleosome-binding domain-containing protein 3
MUC5AC	1.43	0.0208669	0.976	Mucin-5AC
H1F0	1.42	5.52374e-05	0.694	Histone H1.0;Histone H1.0, N-terminally processed
CYLD	1.31	0.00284636	0.944	Ubiquitin carboxyl-terminal hydrolase CYLD
DSG2	1.29	0.000161749	0.802	Desmoglein-2
ITGAV	1.27	0.00426603	0.953	Integrin alpha-V;Integrin alpha-V heavy chain;Integrin alpha-V light chain
CPD	1.25	0.000137165	0.788	Carboxypeptidase D
SCGB1A1	1.25	0.0387379	0.982	Uteroglobin
LSM5	1.2	0.00330417	0.947	U6 snRNA-associated Sm-like protein LSm5
STAU1	1.2	0.000460109	0.874	Double-stranded RNA-binding protein Staufen homolog 1
ERO1L	1.15	0.000402863	0.867	ERO1-like protein alpha
SLC16A3	1.14	5.22784e-07	0.105	Monocarboxylate transporter 4
VAMP8	1.13	0.000353056	0.859	Vesicle-associated membrane protein 8
ASS1	1.12	1.06677e-05	0.465	Argininosuccinate synthase
RRBP1	1.12	2.75554e-05	0.604	Ribosome-binding protein 1
ITGB4	1.1	1.49995e-05	0.516	Integrin beta-4
PFKP	1.1	0.038758	0.982	ATP-dependent 6-phosphofructokinase, platelet type
ZBTB33	1.09	0.000913237	0.907	Transcriptional regulator Kaiso
AFF4	1.08	0.000906411	0.907	AF4/FMR2 family member 4
ITGA6	1.08	0.0311998	0.98	Integrin alpha-6;Integrin alpha-6 heavy chain;Integrin alpha-6 light chain;Processed integrin alpha-6
BPIFA1	1.05	0.00243228	0.94	BPI fold-containing family A member 1
CAV1	1.04	1.58582e-07	0.0477	Caveolin-1
ALDOA	1.03	1.42225e-10	0.000209	Fructose-bisphosphate aldolase A
SPINT1	1.02	0.0010972	0.914	Kunitz-type protease inhibitor 1
LAMTOR5	1.01	2.95846e-06	0.279	Ragulator complex protein LAMTOR5
HSPG2	0.997	0.00509024	0.956	Basement membrane-specific heparan sulfate proteoglycan core protein;Endorepellin;LG3 peptide
PRKX	0.997	0.000186227	0.814	cAMP-dependent protein kinase catalytic subunit PRKX
CEP104	0.994	0.00513942	0.957	Centrosomal protein of 104 kDa
SPATS2L	0.971	0.00911382	0.966	SPATS2-like protein
ARID5B	0.951	0.0197789	0.976	AT-rich interactive domain-containing protein 5B
TFF3	0.948	0.0178016	0.975	Trefoil factor 3
CPOX	0.94	2.8344e-05	0.608	Oxygen-dependent coproporphyrinogen-III oxidase, mitochondrial
NUCB1	0.939	0.00586012	0.959	Nucleobindin-1
ACSF2	0.936	1.80891e-07	0.051	Acyl-CoA synthetase family member 2, mitochondrial
CEP170	0.915	0.000804622	0.902	Centrosomal protein of 170 kDa
TOM1	0.915	0.00222166	0.937	Target of Myb protein 1
KIAA1217	0.909	0.00522872	0.957	Sickle tail protein homolog
TACSTD2	0.909	0.00013159	0.785	Tumor-associated calcium signal transducer 2
MSLN	0.905	0.0110389	0.969	Mesothelin;Megakaryocyte-potentiating factor;Mesothelin, cleaved form
NOLC1	0.901	0.0164842	0.974	Nucleolar and coiled-body phosphoprotein 1
ROCK2	0.901	3.27666e-05	0.628	Rho-associated protein kinase 2
CARHSP1	0.899	0.00957403	0.967	Calcium-regulated heat stable protein 1
LSP1	0.899	0.0132398	0.971	Lymphocyte-specific protein 1
TUBB2A	0.897	5.57088e-07	0.11	Tubulin beta-2A chain
VCL	0.894	8.57971e-05	0.743	Vinculin
MUC1	0.889	0.013705	0.971	Mucin-1;Mucin-1 subunit alpha;Mucin-1 subunit beta
GALE	0.888	0.0151292	0.973	UDP-glucose 4-epimerase
HMGN4	0.888	0.0491137	0.983	High mobility group nucleosome-binding domain-containing protein 4
FAM49B	0.882	8.15982e-05	0.738	Protein FAM49B
MIF	0.875	0.000532128	0.882	Macrophage migration inhibitory factor
WDR33	0.875	0.00064065	0.891	pre-mRNA 3 end processing protein WDR33
LDHA	0.869	0.00203639	0.935	L-lactate dehydrogenase A chain
F3	0.861	0.00199642	0.934	Tissue factor
NDUFB6	0.861	0.00304796	0.945	NADH dehydrogenase [ubiquinone] 1 beta subcomplex subunit 6
GLIPR2	0.851	0.0242033	0.978	Golgi-associated plant pathogenesis-related protein 1
HIST2H2AB	0.85	0.0124576	0.97	Histone H2A type 2-B
SRGAP3	0.85	0.000453414	0.874	SLIT-ROBO Rho GTPase-activating protein 3
EIF4EBP2	0.838	0.0064169	0.961	Eukaryotic translation initiation factor 4E-binding protein 2
SRPRB	0.826	0.00145442	0.924	Signal recognition particle receptor subunit beta
CXCL1	0.823	2.90254e-05	0.611	Growth-regulated alpha protein;GRO-alpha(4-73);GRO-alpha(5-73);GRO-alpha(6-73)
NEDD8	0.823	0.0142558	0.972	NEDD8
SLC39A10	0.822	0.0160341	0.973	Zinc transporter ZIP10
BSG	0.821	0.0016314	0.928	Basigin
GYS1	0.818	1.02873e-05	0.459	Glycogen [starch] synthase, muscle
PHF3	0.815	0.00031282	0.851	PHD finger protein 3
ARHGDIB	0.813	0.014177	0.972	Rho GDP-dissociation inhibitor 2
NUCKS1	0.808	0.0189579	0.975	Nuclear ubiquitous casein and cyclin-dependent kinase substrate 1
DDI2	0.805	0.000993424	0.911	Protein DDI1 homolog 2
AGRN	0.804	0.00199863	0.934	Agrin;Agrin N-terminal 110 kDa subunit;Agrin C-terminal 110 kDa subunit;Agrin C-terminal 90 kDa fragment;Agrin C-terminal 22 kDa fragment
SH3BGRL3	0.803	0.00222999	0.937	SH3 domain-binding glutamic acid-rich-like protein 3
WFDC2	0.803	0.0301243	0.98	WAP four-disulfide core domain protein 2
LASP1	0.801	0.00358458	0.949	LIM and SH3 domain protein 1
BPIFB1	0.797	0.0219011	0.977	BPI fold-containing family B member 1
BCAM	0.79	0.0102687	0.968	Basal cell adhesion molecule
RRAS2	0.781	5.40596e-05	0.691	Ras-related protein R-Ras2
PHF21A	0.776	0.000298288	0.848	PHD finger protein 21A
PRKCA	0.773	0.00849059	0.965	Protein kinase C alpha type
SIRT5	0.77	0.00226495	0.938	NAD-dependent protein deacylase sirtuin-5, mitochondrial
SERPINH1	0.769	0.00497948	0.956	Serpin H1
FHL2	0.764	0.0215373	0.976	Four and a half LIM domains protein 2
TMEM173	0.761	0.0209266	0.976	Stimulator of interferon genes protein
AP1S1	0.757	0.000126183	0.781	AP-1 complex subunit sigma-1A
GMFB	0.753	0.0097207	0.967	Glia maturation factor beta
HIST1H1C	0.75	0.0436062	0.983	Histone H1.2
RRM1	0.742	0.0141055	0.972	Ribonucleoside-diphosphate reductase large subunit
BBS2	0.735	0.00306463	0.946	Bardet-Biedl syndrome 2 protein
DBNL	0.734	6.50867e-05	0.713	Drebrin-like protein
HTRA2	0.732	0.000211245	0.824	Serine protease HTRA2, mitochondrial
CKAP4	0.73	3.3599e-05	0.631	Cytoskeleton-associated protein 4
LRRFIP1	0.729	0.0374727	0.981	Leucine-rich repeat flightless-interacting protein 1
FLOT1	0.727	0.000209911	0.823	Flotillin-1
RPL24	0.727	0.0203095	0.976	60S ribosomal protein L24
FLNA	0.724	0.00213626	0.936	Filamin-A
LAGE3	0.716	0.00261403	0.942	EKC/KEOPS complex subunit LAGE3
LPP	0.713	0.0139017	0.972	Lipoma-preferred partner
PSMA1	0.711	0.00565294	0.958	Proteasome subunit alpha type-1
GNL3	0.706	5.58005e-05	0.695	Guanine nucleotide-binding protein-like 3
IGFBP2	0.704	0.0277268	0.979	Insulin-like growth factor-binding protein 2
PGK1	0.704	6.93925e-06	0.4	Phosphoglycerate kinase 1
SEPT8	0.704	0.000973761	0.91	Septin-8
LYZ	0.703	0.00513034	0.956	Lysozyme C
IRGQ	0.699	0.00316489	0.946	Immunity-related GTPase family Q protein
CDV3	0.693	0.00393737	0.951	Protein CDV3 homolog
PAPSS2	0.693	4.94217e-05	0.68	Bifunctional 3-phosphoadenosine 5-phosphosulfate synthase 2;Sulfate adenylyltransferase;Adenylyl-sulfate kinase
NDUFA2	0.689	0.0467731	0.983	NADH dehydrogenase [ubiquinone] 1 alpha subcomplex subunit 2
ST14	0.68	0.0115572	0.969	Suppressor of tumorigenicity 14 protein
ZYX	0.679	0.0275826	0.979	Zyxin
NMES1	0.676	0.000326526	0.854	Normal mucosa of esophagus-specific gene 1 protein
POF1B	0.675	0.0202338	0.976	Protein POF1B
UAP1	0.673	0.00655102	0.961	UDP-N-acetylhexosamine pyrophosphorylase;UDP-N-acetylgalactosamine pyrophosphorylase;UDP-N-acetylglucosamine pyrophosphorylase
WIBG	0.664	0.00967281	0.967	Partner of Y14 and mago
FLNB	0.663	5.66365e-06	0.37	Filamin-B
IPO9	0.662	0.00682194	0.962	Importin-9
EML4	0.659	0.00763084	0.963	Echinoderm microtubule-associated protein-like 4
MRPS5	0.658	0.0070276	0.962	28S ribosomal protein S5, mitochondrial
HDLBP	0.657	0.00015715	0.8	Vigilin
ARPP19	0.654	0.0222087	0.977	cAMP-regulated phosphoprotein 19
PTK2	0.653	0.00137635	0.923	Focal adhesion kinase 1
STAT2	0.653	0.000354061	0.859	Signal transducer and activator of transcription 2
TPM4	0.652	0.000342299	0.857	Tropomyosin alpha-4 chain
ATAD3B	0.651	0.00968573	0.967	ATPase family AAA domain-containing protein 3B
HN1L	0.649	0.0165792	0.974	Hematological and neurological expressed 1-like protein
ANKS1A	0.647	0.00835912	0.965	Ankyrin repeat and SAM domain-containing protein 1A
AHCYL2	0.646	0.000241382	0.834	Putative adenosylhomocysteinase 3
EPB41L1	0.646	0.00205512	0.935	Band 4.1-like protein 1
NDUFA7	0.645	0.0152748	0.973	NADH dehydrogenase [ubiquinone] 1 alpha subcomplex subunit 7
SHMT2	0.643	0.00796994	0.964	Serine hydroxymethyltransferase, mitochondrial
IRF2BP2	0.639	0.00216505	0.937	Interferon regulatory factor 2-binding protein 2
PSMB10	0.637	0.00972566	0.967	Proteasome subunit beta type-10
SORD	0.635	0.00250909	0.941	Sorbitol dehydrogenase
TLN1	0.634	0.0129464	0.971	Talin-1
RIOK3	0.631	0.0294661	0.979	Serine/threonine-protein kinase RIO3
HP1BP3	0.627	0.0209357	0.976	Heterochromatin protein 1-binding protein 3
LIMA1	0.618	0.0107931	0.968	LIM domain and actin-binding protein 1
EXOC5	0.617	7.45783e-05	0.728	Exocyst complex component 5
TNRC6B	0.616	0.000882962	0.906	Trinucleotide repeat-containing gene 6B protein
ARHGEF5	0.611	0.00467455	0.955	Rho guanine nucleotide exchange factor 5
CWC15	0.61	0.0232362	0.977	Spliceosome-associated protein CWC15 homolog
PPIG	0.61	0.0325921	0.98	Peptidyl-prolyl cis-trans isomerase G
BID	0.609	0.00494394	0.956	BH3-interacting domain death agonist;BH3-interacting domain death agonist p15;BH3-interacting domain death agonist p13;BH3-interacting domain death agonist p11
YWHAB	0.607	0.000608394	0.889	14-3-3 protein beta/alpha;14-3-3 protein beta/alpha, N-terminally processed
LDLRAD1	0.605	0.00126909	0.92	Low-density lipoprotein receptor class A domain-containing protein 1
C11orf52	0.604	0.00618171	0.96	Uncharacterized protein C11orf52
ACO1	0.6	0.000547193	0.884	Cytoplasmic aconitate hydratase
NUFIP2	0.599	0.00192834	0.933	Nuclear fragile X mental retardation-interacting protein 2
PDCD11	0.596	0.0307789	0.98	Protein RRP5 homolog
PPP1R8	0.596	0.00593122	0.959	Nuclear inhibitor of protein phosphatase 1;Activator of RNA decay
GOLGB1	0.595	0.0189567	0.975	Golgin subfamily B member 1
NUP88	0.592	0.0174797	0.974	Nuclear pore complex protein Nup88
SEC22B	0.591	0.0162501	0.973	Vesicle-trafficking protein SEC22b
RRP12	0.59	0.0488842	0.983	RRP12-like protein
TXNDC17	0.588	0.0185374	0.975	Thioredoxin domain-containing protein 17
GALNT7	0.586	0.00505563	0.956	N-acetylgalactosaminyltransferase 7
PLEKHS1	0.577	0.0403333	0.982	Pleckstrin homology domain-containing family S member 1
RPS26	0.575	0.0262874	0.978	40S ribosomal protein S26;Putative 40S ribosomal protein S26-like 1
HMGCS1	0.574	0.0456212	0.983	Hydroxymethylglutaryl-CoA synthase, cytoplasmic
APOL2	0.571	0.0440029	0.983	Apolipoprotein L2
NMNAT1	0.566	0.000874995	0.905	Nicotinamide/nicotinic acid mononucleotide adenylyltransferase 1
ABI1	0.563	0.0277559	0.979	Abl interactor 1
RBM8A	0.563	0.034552	0.981	RNA-binding protein 8A
SCRN1	0.563	0.0283003	0.979	Secernin-1
CST3	0.562	0.0340355	0.981	Cystatin-C
KRAS	0.561	0.000544123	0.883	GTPase KRas;GTPase KRas, N-terminally processed
APPL1	0.558	0.000450171	0.873	DCC-interacting protein 13-alpha
LY75	0.554	0.00275334	0.943	Lymphocyte antigen 75
GRIPAP1	0.551	0.0264725	0.978	GRIP1-associated protein 1
RNPS1	0.55	0.0218647	0.977	RNA-binding protein with serine-rich domain 1
RBMX	0.549	0.0465937	0.983	RNA-binding motif protein, X chromosome;RNA-binding motif protein, X chromosome, N-terminally processed
STK24	0.549	0.00472246	0.955	Serine/threonine-protein kinase 24;Serine/threonine-protein kinase 24 36 kDa subunit;Serine/threonine-protein kinase 24 12 kDa subunit
SEC23IP	0.547	0.01294	0.971	SEC23-interacting protein
HIGD1A	0.546	0.0154066	0.973	HIG1 domain family member 1A, mitochondrial
MAGED2	0.545	0.0194209	0.975	Melanoma-associated antigen D2
THEM6	0.543	0.00193778	0.933	Protein THEM6
PXN	0.541	0.0127735	0.971	Paxillin
PCNP	0.54	0.0381121	0.982	PEST proteolytic signal-containing nuclear protein
MAP4	0.539	0.0024134	0.94	Microtubule-associated protein 4
PPP1R14B	0.539	0.000492474	0.878	Protein phosphatase 1 regulatory subunit 14B
ATP6V1D	0.536	0.00414128	0.952	V-type proton ATPase subunit D
PKM	0.534	0.00117853	0.917	Pyruvate kinase PKM
FAM21A	0.532	0.0130049	0.971	WASH complex subunit FAM21A
SRSF9	0.527	9.84191e-05	0.757	Serine/arginine-rich splicing factor 9
RCC1	0.525	0.0245724	0.978	Regulator of chromosome condensation
SEPT9	0.524	0.0208224	0.976	Septin-9
SUCLG2	0.522	0.0197409	0.976	Succinyl-CoA ligase [GDP-forming] subunit beta, mitochondrial
HSPA6	0.521	0.0288417	0.979	Heat shock 70 kDa protein 6
PPP1R13L	0.52	0.0113005	0.969	RelA-associated inhibitor
EFHC2	0.516	0.00792692	0.964	EF-hand domain-containing family member C2
CEP131	0.513	0.01529	0.973	Centrosomal protein of 131 kDa
CHMP2A	0.505	0.00601211	0.959	Charged multivesicular body protein 2a
IFT57	0.505	0.011303	0.969	Intraflagellar transport protein 57 homolog
DLGAP4	0.502	0.0187266	0.975	Disks large-associated protein 4
CLINT1	0.501	0.00777083	0.964	Clathrin interactor 1
RTN3	0.5	0.022244	0.977	Reticulon-3
ANXA2	0.492	0.00514359	0.957	Annexin A2;Putative annexin A2-like protein
DLST	0.492	0.00929646	0.966	Dihydrolipoyllysine-residue succinyltransferase component of 2-oxoglutarate dehydrogenase complex, mitochondrial
FKBP15	0.491	0.0406923	0.982	FK506-binding protein 15
DUT	0.49	0.0103932	0.968	Deoxyuridine 5-triphosphate nucleotidohydrolase, mitochondrial
POFUT1	0.487	0.0147203	0.972	GDP-fucose protein O-fucosyltransferase 1
ALDH2	0.485	0.0235861	0.977	Aldehyde dehydrogenase, mitochondrial
IQUB	0.485	0.0303334	0.98	IQ and ubiquitin-like domain-containing protein
RBBP7	0.485	0.0319483	0.98	Histone-binding protein RBBP7
CMAS	0.483	0.00508501	0.956	N-acylneuraminate cytidylyltransferase
TUBB	0.482	0.0125679	0.97	Tubulin beta chain
YWHAG	0.482	0.0107444	0.968	14-3-3 protein gamma;14-3-3 protein gamma, N-terminally processed
HYPK	0.481	5.68152e-05	0.697	Huntingtin-interacting protein K
ENKUR	0.48	0.000191063	0.816	Enkurin
AK2	0.475	0.00714376	0.962	Adenylate kinase 2, mitochondrial;Adenylate kinase 2, mitochondrial, N-terminally processed
SSNA1	0.475	0.0112262	0.969	Sjoegren syndrome nuclear autoantigen 1
TCEB3	0.473	0.0141503	0.972	Transcription elongation factor B polypeptide 3
NIF3L1	0.47	0.00953588	0.967	NIF3-like protein 1
RDH10	0.47	0.00125782	0.919	Retinol dehydrogenase 10
SAFB2	0.467	0.00168023	0.929	Scaffold attachment factor B2
HINT1	0.463	0.047411	0.983	Histidine triad nucleotide-binding protein 1
PHF6	0.463	0.0113974	0.969	PHD finger protein 6
SLFN5	0.46	0.0381602	0.982	Schlafen family member 5
KIAA1598	0.459	0.00687394	0.962	Shootin-1
ANXA3	0.458	0.0250357	0.978	Annexin A3
ATXN10	0.455	0.004606	0.954	Ataxin-10
MOB1B	0.452	0.00870691	0.965	MOB kinase activator 1B;MOB kinase activator 1A
GSTT1	0.45	0.0352774	0.981	Glutathione S-transferase theta-1
TPD52L2	0.448	0.0449729	0.983	Tumor protein D54
AP1M1	0.447	0.0402691	0.982	AP-1 complex subunit mu-1
NUP205	0.447	0.0453391	0.983	Nuclear pore complex protein Nup205
TMCO1	0.446	0.00949867	0.967	Transmembrane and coiled-coil domain-containing protein 1
SART1	0.444	0.0211891	0.976	U4/U6.U5 tri-snRNP-associated protein 1
MAP7	0.443	0.00474638	0.955	Ensconsin
LARP7	0.442	0.0130919	0.971	La-related protein 7
SP3	0.442	0.0275693	0.979	Transcription factor Sp3
CPSF1	0.437	0.0110666	0.969	Cleavage and polyadenylation specificity factor subunit 1
PPM1A	0.436	0.00469234	0.955	Protein phosphatase 1A
ADPGK	0.434	0.0249141	0.978	ADP-dependent glucokinase
MAPRE1	0.434	0.0289344	0.979	Microtubule-associated protein RP/EB family member 1
MRI1	0.429	0.00660553	0.961	Methylthioribose-1-phosphate isomerase
STRBP	0.429	0.0272705	0.979	Spermatid perinuclear RNA-binding protein
TCIRG1	0.428	0.00393024	0.951	V-type proton ATPase 116 kDa subunit a isoform 3
TNKS1BP1	0.428	0.0271492	0.979	182 kDa tankyrase-1-binding protein
PCCB	0.426	0.0013228	0.921	Propionyl-CoA carboxylase beta chain, mitochondrial
SH3GL1	0.426	0.00566346	0.958	Endophilin-A2
SSH3	0.425	0.0354139	0.981	Protein phosphatase Slingshot homolog 3
RSL1D1	0.424	0.00554852	0.958	Ribosomal L1 domain-containing protein 1
ARMC6	0.423	0.010776	0.968	Armadillo repeat-containing protein 6
CCDC173	0.423	0.0237363	0.977	Coiled-coil domain-containing protein 173
DBT	0.415	0.037883	0.981	Lipoamide acyltransferase component of branched-chain alpha-keto acid dehydrogenase complex, mitochondrial
PTK7	0.415	0.00629741	0.96	Inactive tyrosine-protein kinase 7
ALDH6A1	0.414	0.0337222	0.981	Methylmalonate-semialdehyde dehydrogenase [acylating], mitochondrial
HNRNPAB	0.413	0.0174599	0.974	Heterogeneous nuclear ribonucleoprotein A/B
THOP1	0.41	0.0231846	0.977	Thimet oligopeptidase
MAPK14	0.409	0.0278773	0.979	Mitogen-activated protein kinase 14
MAPK13	0.408	0.0316892	0.98	Mitogen-activated protein kinase 13
TRMT10C	0.408	0.000498809	0.879	Mitochondrial ribonuclease P protein 1
UTRN	0.408	0.0142895	0.972	Utrophin
GORASP2	0.407	0.0187689	0.975	Golgi reassembly-stacking protein 2
PABPN1	0.407	0.014781	0.972	Polyadenylate-binding protein 2
ACOX1	0.405	0.0169423	0.974	Peroxisomal acyl-coenzyme A oxidase 1
MTPN	0.405	0.00752608	0.963	Myotrophin
ACTR3	0.402	0.0322623	0.98	Actin-related protein 3
ATP1A1	0.402	0.0186666	0.975	Sodium/potassium-transporting ATPase subunit alpha-1
ZNF717	0.402	0.0385344	0.982	Zinc finger protein 717
RPA1	0.398	0.0180551	0.975	Replication protein A 70 kDa DNA-binding subunit;Replication protein A 70 kDa DNA-binding subunit, N-terminally processed
FYCO1	0.396	0.00177435	0.931	FYVE and coiled-coil domain-containing protein 1
WDR35	0.395	0.0340757	0.981	WD repeat-containing protein 35
BRIX1	0.394	0.00606001	0.96	Ribosome biogenesis protein BRX1 homolog
CASP3	0.393	0.0220695	0.977	Caspase-3;Caspase-3 subunit p17;Caspase-3 subunit p12
RBM10	0.393	0.000177024	0.81	RNA-binding protein 10
ATP2B4	0.392	0.026727	0.979	Plasma membrane calcium-transporting ATPase 4
CECR5	0.392	0.0410669	0.982	Cat eye syndrome critical region protein 5
MRPS27	0.39	0.022853	0.977	28S ribosomal protein S27, mitochondrial
AFG3L2	0.389	0.0180134	0.975	AFG3-like protein 2
DDX39A	0.389	0.0138654	0.972	ATP-dependent RNA helicase DDX39A
PDP1	0.388	0.00215589	0.936	[Pyruvate dehydrogenase [acetyl-transferring]]-phosphatase 1, mitochondrial
MNS1	0.387	0.00590992	0.959	Meiosis-specific nuclear structural protein 1
CHMP4B	0.386	0.0212705	0.976	Charged multivesicular body protein 4b
NAA50	0.385	0.0325299	0.98	N-alpha-acetyltransferase 50
SLC9A3R1	0.385	0.0495147	0.983	Na(+)/H(+) exchange regulatory cofactor NHE-RF1
HOOK1	0.382	0.0324588	0.98	Protein Hook homolog 1
SF3B2	0.382	0.0446796	0.983	Splicing factor 3B subunit 2
HDGFRP2	0.381	0.0455677	0.983	Hepatoma-derived growth factor-related protein 2
TMTC3	0.38	0.0168403	0.974	Transmembrane and TPR repeat-containing protein 3
CBX3	0.378	0.0134109	0.971	Chromobox protein homolog 3
STX12	0.378	0.00586904	0.959	Syntaxin-12
AIP	0.375	0.0163707	0.974	AH receptor-interacting protein
PPP1R12A	0.374	0.00966772	0.967	Protein phosphatase 1 regulatory subunit 12A
PTPRF	0.374	0.0293404	0.979	Receptor-type tyrosine-protein phosphatase F
RFX3	0.374	0.01569	0.973	Transcription factor RFX3
STEAP3	0.373	0.00524169	0.957	Metalloreductase STEAP3
ACYP1	0.371	0.00750233	0.963	Acylphosphatase-1
HSP90B1	0.371	0.0049441	0.956	Endoplasmin
NUP98	0.369	0.0410777	0.982	Nuclear pore complex protein Nup98-Nup96;Nuclear pore complex protein Nup98;Nuclear pore complex protein Nup96
DCAF7	0.366	0.0413003	0.982	DDB1- and CUL4-associated factor 7
PPIA	0.365	0.0456991	0.983	Peptidyl-prolyl cis-trans isomerase A;Peptidyl-prolyl cis-trans isomerase A, N-terminally processed
RHOG	0.365	0.0260719	0.978	Rho-related GTP-binding protein RhoG
RPL14	0.362	0.0407726	0.982	60S ribosomal protein L14
IFT140	0.361	0.0279395	0.979	Intraflagellar transport protein 140 homolog
NCL	0.356	0.0461584	0.983	Nucleolin
PDLIM4	0.355	0.0289955	0.979	PDZ and LIM domain protein 4
NOP56	0.354	0.0454537	0.983	Nucleolar protein 56
SON	0.353	0.0128945	0.971	Protein SON
LIMD1	0.352	0.00121429	0.918	LIM domain-containing protein 1
DNAJB11	0.349	0.02475	0.978	DnaJ homolog subfamily B member 11
PDLIM1	0.349	0.00412149	0.952	PDZ and LIM domain protein 1
ECI2	0.348	0.0130314	0.971	Enoyl-CoA delta isomerase 2, mitochondrial
RNASET2	0.348	0.041898	0.982	Ribonuclease T2
SCO1	0.348	0.00670119	0.961	Protein SCO1 homolog, mitochondrial
BRCC3	0.346	0.0379428	0.981	Lys-63-specific deubiquitinase BRCC36
RPL26L1	0.344	0.0148313	0.972	60S ribosomal protein L26-like 1
NDUFA4	0.342	0.0288547	0.979	Cytochrome c oxidase subunit NDUFA4
DCXR	0.341	0.0310735	0.98	L-xylulose reductase
CTTN	0.34	0.0214819	0.976	Src substrate cortactin
MYH9	0.339	0.00724141	0.963	Myosin-9
NDUFC2	0.339	0.0369825	0.981	NADH dehydrogenase [ubiquinone] 1 subunit C2
KDSR	0.338	0.0444258	0.983	3-ketodihydrosphingosine reductase
NDUFA6	0.338	0.0259095	0.978	NADH dehydrogenase [ubiquinone] 1 alpha subcomplex subunit 6
LEMD3	0.337	0.0424142	0.982	Inner nuclear membrane protein Man1
SMARCA5	0.337	0.0438711	0.983	SWI/SNF-related matrix-associated actin-dependent regulator of chromatin subfamily A member 5
GIPC1	0.336	0.0327888	0.98	PDZ domain-containing protein GIPC1
TBC1D5	0.333	0.0422378	0.982	TBC1 domain family member 5
PDIA3	0.33	0.0121828	0.97	Protein disulfide-isomerase A3
DGKA	0.329	0.0258593	0.978	Diacylglycerol kinase alpha
LANCL2	0.329	0.0103982	0.968	LanC-like protein 2
CUL1	0.326	0.0214389	0.976	Cullin-1
ATG16L1	0.322	0.0166763	0.974	Autophagy-related protein 16-1
BCAR1	0.322	0.0342996	0.981	Breast cancer anti-estrogen resistance protein 1
EIF5B	0.32	0.040845	0.982	Eukaryotic translation initiation factor 5B
MPI	0.316	0.0140716	0.972	Mannose-6-phosphate isomerase
TRAF2	0.316	0.00661578	0.961	TNF receptor-associated factor 2
STAMBP	0.313	0.0221652	0.977	STAM-binding protein
UFD1L	0.312	0.0339939	0.981	Ubiquitin fusion degradation protein 1 homolog
PLIN3	0.306	0.0200235	0.976	Perilipin-3
CPSF7	0.301	0.0376441	0.981	Cleavage and polyadenylation specificity factor subunit 7
ROCK1	0.298	0.0113727	0.969	Rho-associated protein kinase 1
VPS26A	0.29	0.0429806	0.982	Vacuolar protein sorting-associated protein 26A
COA3	0.286	0.0224779	0.977	Cytochrome c oxidase assembly factor 3 homolog, mitochondrial
CWF19L1	0.285	0.0400051	0.982	CWF19-like protein 1
NAP1L4	0.273	0.0222031	0.977	Nucleosome assembly protein 1-like 4
SDHA	0.272	0.0221699	0.977	Succinate dehydrogenase [ubiquinone] flavoprotein subunit, mitochondrial
TES	0.271	0.047727	0.983	Testin
KIAA1279	0.268	0.0490109	0.983	KIF1-binding protein
P4HTM	0.265	0.00773049	0.964	Transmembrane prolyl 4-hydroxylase
NAPG	-0.281	0.0465275	0.983	Gamma-soluble NSF attachment protein
SH3PXD2B	-0.3	0.00893026	0.966	SH3 and PX domain-containing protein 2B
UMPS	-0.301	0.0105116	0.968	Uridine 5-monophosphate synthase;Orotate phosphoribosyltransferase;Orotidine 5-phosphate decarboxylase
KIF3B	-0.303	0.0377029	0.981	Kinesin-like protein KIF3B;Kinesin-like protein KIF3B, N-terminally processed
PRKACA	-0.313	0.021441	0.976	cAMP-dependent protein kinase catalytic subunit alpha
KARS	-0.317	0.0397525	0.982	Lysine--tRNA ligase
TACO1	-0.323	0.0141662	0.972	Translational activator of cytochrome c oxidase 1
STX18	-0.331	0.0307776	0.98	Syntaxin-18
TEKT1	-0.338	0.0376155	0.981	Tektin-1
ROPN1L	-0.339	0.0403003	0.982	Ropporin-1-like protein
DDX42	-0.344	0.0173793	0.974	ATP-dependent RNA helicase DDX42
BCAP29	-0.345	0.00913973	0.966	B-cell receptor-associated protein 29
NEK9	-0.353	0.00553497	0.958	Serine/threonine-protein kinase Nek9
PSMC5	-0.36	0.0126303	0.97	26S protease regulatory subunit 8
MGLL	-0.365	0.038258	0.982	Monoglyceride lipase
MAP2K2	-0.367	0.0415901	0.982	Dual specificity mitogen-activated protein kinase kinase 2
RANBP2	-0.371	0.0264512	0.978	E3 SUMO-protein ligase RanBP2
HSPA4	-0.373	0.0186738	0.975	Heat shock 70 kDa protein 4
MUT	-0.38	0.0276994	0.979	Methylmalonyl-CoA mutase, mitochondrial
FAM129B	-0.387	0.015227	0.973	Niban-like protein 1
MDM1	-0.387	0.03942	0.982	Nuclear protein MDM1
CCT2	-0.389	0.0368753	0.981	T-complex protein 1 subunit beta
CSTF3	-0.389	0.00901064	0.966	Cleavage stimulation factor subunit 3
MYO1D	-0.391	0.0257095	0.978	Unconventional myosin-Id
DYNC1LI1	-0.392	0.00975199	0.967	Cytoplasmic dynein 1 light intermediate chain 1
NUP93	-0.392	0.0144039	0.972	Nuclear pore complex protein Nup93
DYNC1LI2	-0.398	0.0387263	0.982	Cytoplasmic dynein 1 light intermediate chain 2
VTA1	-0.398	0.0345681	0.981	Vacuolar protein sorting-associated protein VTA1 homolog
DYNLT1	-0.404	0.0491984	0.983	Dynein light chain Tctex-type 1
ATP1B3	-0.406	0.0158737	0.973	Sodium/potassium-transporting ATPase subunit beta-3
SKP1	-0.407	0.0248954	0.978	S-phase kinase-associated protein 1
SCFD1	-0.41	0.017928	0.975	Sec1 family domain-containing protein 1
EML2	-0.411	0.00809567	0.964	Echinoderm microtubule-associated protein-like 2
XRCC6	-0.42	0.00527266	0.957	X-ray repair cross-complementing protein 6
CAPRIN1	-0.424	0.029494	0.979	Caprin-1
CHMP5	-0.432	0.0183292	0.975	Charged multivesicular body protein 5
GMPPB	-0.434	0.0258795	0.978	Mannose-1-phosphate guanyltransferase beta
SNCA	-0.439	0.0383259	0.982	Alpha-synuclein
TRAP1	-0.448	0.0140955	0.972	Heat shock protein 75 kDa, mitochondrial
GART	-0.449	0.00970112	0.967	Trifunctional purine biosynthetic protein adenosine-3;Phosphoribosylamine--glycine ligase;Phosphoribosylformylglycinamidine cyclo-ligase;Phosphoribosylglycinamide formyltransferase
EZR	-0.45	0.00807184	0.964	Ezrin
HDHD2	-0.45	0.022822	0.977	Haloacid dehalogenase-like hydrolase domain-containing protein 2
CAMK2D	-0.451	0.00619467	0.96	Calcium/calmodulin-dependent protein kinase type II subunit delta
RAVER1	-0.458	0.0124437	0.97	Ribonucleoprotein PTB-binding 1
USMG5	-0.464	0.0159487	0.973	Up-regulated during skeletal muscle growth protein 5
DDX6	-0.476	0.0226699	0.977	Probable ATP-dependent RNA helicase DDX6
PSMD5	-0.478	0.0213517	0.976	26S proteasome non-ATPase regulatory subunit 5
EIF2S3	-0.487	0.0237597	0.977	Eukaryotic translation initiation factor 2 subunit 3;Putative eukaryotic translation initiation factor 2 subunit 3-like protein
NUP133	-0.488	0.0264915	0.978	Nuclear pore complex protein Nup133
HNRNPH1	-0.489	0.00666808	0.961	Heterogeneous nuclear ribonucleoprotein H;Heterogeneous nuclear ribonucleoprotein H, N-terminally processed
SEPT11	-0.496	0.00433878	0.953	Septin-11
MATR3	-0.499	0.0058893	0.959	Matrin-3
RBM47	-0.5	0.0171503	0.974	RNA-binding protein 47
GCLC	-0.502	0.0341891	0.981	Glutamate--cysteine ligase catalytic subunit
IFT74	-0.508	0.0424685	0.982	Intraflagellar transport protein 74 homolog
PRPS2	-0.508	0.0252501	0.978	Ribose-phosphate pyrophosphokinase 2
PRDX1	-0.51	0.0204726	0.976	Peroxiredoxin-1
OXCT1	-0.514	0.0337666	0.981	Succinyl-CoA:3-ketoacid coenzyme A transferase 1, mitochondrial
HSP90AA1	-0.516	0.0124135	0.97	Heat shock protein HSP 90-alpha
SCP2	-0.516	0.0261343	0.978	Non-specific lipid-transfer protein
SF3B3	-0.523	0.0275154	0.979	Splicing factor 3B subunit 3
DHRS1	-0.527	0.000801095	0.902	Dehydrogenase/reductase SDR family member 1
IPO7	-0.533	0.00548327	0.958	Importin-7
PHB2	-0.533	0.034195	0.981	Prohibitin-2
RPL4	-0.533	0.0465304	0.983	60S ribosomal protein L4
SULT1A1	-0.535	0.0133311	0.971	Sulfotransferase 1A1;Sulfotransferase 1A2
TUFM	-0.536	0.0139341	0.972	Elongation factor Tu, mitochondrial
GSTO1	-0.538	0.0345168	0.981	Glutathione S-transferase omega-1
ARPC1A	-0.543	0.012218	0.97	Actin-related protein 2/3 complex subunit 1A
HSPA1B	-0.543	0.0191855	0.975	Heat shock 70 kDa protein 1B;Heat shock 70 kDa protein 1A
PSMF1	-0.546	0.0116534	0.969	Proteasome inhibitor PI31 subunit
AQP5	-0.549	0.016935	0.974	Aquaporin-5
HSPB11	-0.56	0.00343733	0.948	Intraflagellar transport protein 25 homolog
IFI16	-0.564	0.0012809	0.92	Gamma-interferon-inducible protein 16
LRRC46	-0.564	0.0332377	0.98	Leucine-rich repeat-containing protein 46
NAA40	-0.568	0.00100569	0.911	N-alpha-acetyltransferase 40
SFPQ	-0.571	0.0201818	0.976	Splicing factor, proline- and glutamine-rich
COASY	-0.574	0.0102809	0.968	Bifunctional coenzyme A synthase;Phosphopantetheine adenylyltransferase;Dephospho-CoA kinase
DSTN	-0.574	0.00621233	0.96	Destrin
HNRNPK	-0.585	0.00114788	0.916	Heterogeneous nuclear ribonucleoprotein K
MOGS	-0.586	0.0372157	0.981	Mannosyl-oligosaccharide glucosidase
NAT1	-0.588	0.0189434	0.975	Arylamine N-acetyltransferase 1
UFL1	-0.588	0.012305	0.97	E3 UFM1-protein ligase 1
HNRNPH2	-0.593	0.0287819	0.979	Heterogeneous nuclear ribonucleoprotein H2
SEPT2	-0.593	0.0104004	0.968	Septin-2
CYC1	-0.597	0.0358161	0.981	Cytochrome c1, heme protein, mitochondrial
PARK7	-0.597	0.0240731	0.978	Protein deglycase DJ-1
MCTS1	-0.598	0.00871903	0.965	Malignant T-cell-amplified sequence 1
CLTC	-0.6	0.0247076	0.978	Clathrin heavy chain 1
ABCC1	-0.603	0.00111932	0.915	Multidrug resistance-associated protein 1
COPS3	-0.603	0.0428114	0.982	COP9 signalosome complex subunit 3
ANXA4	-0.604	0.00882604	0.966	Annexin A4
CAND1	-0.604	0.0160988	0.973	Cullin-associated NEDD8-dissociated protein 1
CNN2	-0.605	0.00544193	0.958	Calponin-2
UBA6	-0.607	0.0461454	0.983	Ubiquitin-like modifier-activating enzyme 6
PDZD11	-0.609	0.00618124	0.96	PDZ domain-containing protein 11
PTBP3	-0.609	0.0223411	0.977	Polypyrimidine tract-binding protein 3
HSPH1	-0.611	0.00453395	0.954	Heat shock protein 105 kDa
SUGT1	-0.616	0.0341002	0.981	Suppressor of G2 allele of SKP1 homolog
PIGS	-0.618	0.0391537	0.982	GPI transamidase component PIG-S
DNAAF1	-0.619	0.00849658	0.965	Dynein assembly factor 1, axonemal
PLEKHA5	-0.628	0.0302518	0.98	Pleckstrin homology domain-containing family A member 5
CEP135	-0.629	0.0483448	0.983	Centrosomal protein of 135 kDa
CYP2S1	-0.632	0.00179987	0.931	Cytochrome P450 2S1
ATP5O	-0.634	0.039406	0.982	ATP synthase subunit O, mitochondrial
GMPR2	-0.639	0.00977443	0.967	GMP reductase 2
HSPBP1	-0.645	0.00106965	0.913	Hsp70-binding protein 1
KYNU	-0.645	0.0256575	0.978	Kynureninase
SNRNP70	-0.652	0.00595671	0.959	U1 small nuclear ribonucleoprotein 70 kDa
TTC25	-0.654	0.042325	0.982	Tetratricopeptide repeat protein 25
COPS4	-0.658	8.64201e-05	0.744	COP9 signalosome complex subunit 4
RPL3	-0.658	0.0376573	0.981	60S ribosomal protein L3
ACADSB	-0.667	0.00604471	0.959	Short/branched chain specific acyl-CoA dehydrogenase, mitochondrial
RABL2B	-0.675	0.00116692	0.917	Rab-like protein 2B;Rab-like protein 2A
HMGB1	-0.678	0.0182083	0.975	High mobility group protein B1;Putative high mobility group protein B1-like 1
CHORDC1	-0.68	0.00495144	0.956	Cysteine and histidine-rich domain-containing protein 1
MAPRE3	-0.68	0.00180402	0.931	Microtubule-associated protein RP/EB family member 3
RPL15	-0.683	0.0316983	0.98	60S ribosomal protein L15
AASS	-0.69	0.0139166	0.972	Alpha-aminoadipic semialdehyde synthase, mitochondrial;Lysine ketoglutarate reductase;Saccharopine dehydrogenase
SELENBP1	-0.694	0.0498049	0.983	Selenium-binding protein 1
EFHC1	-0.697	0.0308507	0.98	EF-hand domain-containing protein 1
AP2A2	-0.7	0.0445667	0.983	AP-2 complex subunit alpha-2
PEBP1	-0.701	0.00586631	0.959	Phosphatidylethanolamine-binding protein 1;Hippocampal cholinergic neurostimulating peptide
ACLY	-0.703	0.0204227	0.976	ATP-citrate synthase
APRT	-0.705	0.0264289	0.978	Adenine phosphoribosyltransferase
SPTBN2	-0.708	0.00819655	0.964	Spectrin beta chain, non-erythrocytic 2
KPNA3	-0.712	0.00265503	0.942	Importin subunit alpha-4
XPO1	-0.712	0.00531708	0.957	Exportin-1
AHSA1	-0.715	0.0364738	0.981	Activator of 90 kDa heat shock protein ATPase homolog 1
HAGH	-0.722	0.017585	0.974	Hydroxyacylglutathione hydrolase, mitochondrial
MARS	-0.722	0.0142974	0.972	Methionine--tRNA ligase, cytoplasmic
ILF2	-0.723	0.00482453	0.955	Interleukin enhancer-binding factor 2
DYNC1H1	-0.725	0.00762433	0.963	Cytoplasmic dynein 1 heavy chain 1
NIT2	-0.734	0.0472403	0.983	Omega-amidase NIT2
UPK1B	-0.735	0.000806744	0.902	Uroplakin-1b
EEF1G	-0.736	0.0073491	0.963	Elongation factor 1-gamma
FLAD1	-0.74	0.0386805	0.982	FAD synthase;Molybdenum cofactor biosynthesis protein-like region;FAD synthase region
NSUN2	-0.74	0.0173348	0.974	tRNA (cytosine(34)-C(5))-methyltransferase
TTLL12	-0.743	0.0476671	0.983	Tubulin--tyrosine ligase-like protein 12
ARL3	-0.744	0.00579269	0.959	ADP-ribosylation factor-like protein 3
IFT52	-0.744	0.0270039	0.979	Intraflagellar transport protein 52 homolog
GNA11	-0.747	0.0295306	0.979	Guanine nucleotide-binding protein subunit alpha-11
ILVBL	-0.754	0.00662129	0.961	Acetolactate synthase-like protein
MAP1A	-0.755	0.0386645	0.982	Microtubule-associated protein 1A;MAP1A heavy chain;MAP1 light chain LC2
PIR	-0.758	0.000566369	0.885	Pirin
CCDC151	-0.759	0.0491813	0.983	Coiled-coil domain-containing protein 151
RPL22	-0.764	0.00999039	0.967	60S ribosomal protein L22
CTBP1	-0.773	0.00148135	0.925	C-terminal-binding protein 1
RAN	-0.774	0.0473356	0.983	GTP-binding nuclear protein Ran
DDX5	-0.775	0.0249817	0.978	Probable ATP-dependent RNA helicase DDX5
GDI1	-0.777	0.010551	0.968	Rab GDP dissociation inhibitor alpha
PRPF31	-0.777	0.0172305	0.974	U4/U6 small nuclear ribonucleoprotein Prp31
FIS1	-0.778	0.00303074	0.945	Mitochondrial fission 1 protein
SERPINB5	-0.779	0.015672	0.973	Serpin B5
UBE2L3	-0.781	0.0115366	0.969	Ubiquitin-conjugating enzyme E2 L3
ABCE1	-0.792	0.00152439	0.926	ATP-binding cassette sub-family E member 1
SPATA6	-0.793	0.00183191	0.932	Spermatogenesis-associated protein 6
DDX3X	-0.794	0.00287082	0.944	ATP-dependent RNA helicase DDX3X
TSPO	-0.794	0.0112612	0.969	Translocator protein
S100A16	-0.796	0.00806123	0.964	Protein S100-A16
KIF21A	-0.797	0.015962	0.973	Kinesin-like protein KIF21A
LARS	-0.797	0.0176961	0.974	Leucine--tRNA ligase, cytoplasmic
PIGR	-0.802	0.00112342	0.915	Polymeric immunoglobulin receptor;Secretory component
TNC	-0.813	0.0322941	0.98	Tenascin
SLC25A4	-0.814	0.00848482	0.965	ADP/ATP translocase 1
BLVRA	-0.818	0.000448215	0.873	Biliverdin reductase A
RSPH4A	-0.819	0.0211835	0.976	Radial spoke head protein 4 homolog A
CBR1	-0.821	0.000234948	0.832	Carbonyl reductase [NADPH] 1
AK7	-0.824	0.00109075	0.914	Adenylate kinase 7
CAPN2	-0.826	0.00941752	0.967	Calpain-2 catalytic subunit
BASP1	-0.833	0.0488503	0.983	Brain acid soluble protein 1
RPL18	-0.836	0.00888602	0.966	60S ribosomal protein L18
SPRR1B	-0.841	0.0434727	0.983	Cornifin-B
ABHD10	-0.842	0.0220232	0.977	Mycophenolic acid acyl-glucuronide esterase, mitochondrial
FH	-0.843	0.000666396	0.893	Fumarate hydratase, mitochondrial
CD59	-0.844	0.00870859	0.965	CD59 glycoprotein
MAOA	-0.847	0.0231611	0.977	Amine oxidase [flavin-containing] A
EIF4A3	-0.848	0.0125664	0.97	Eukaryotic initiation factor 4A-III;Eukaryotic initiation factor 4A-III, N-terminally processed
LGALS3	-0.851	0.0191304	0.975	Galectin-3
PCM1	-0.856	0.00244616	0.94	Pericentriolar material 1 protein
CES2	-0.867	0.00747778	0.963	Cocaine esterase
CAPNS1	-0.869	0.0347974	0.981	Calpain small subunit 1
IFT172	-0.874	0.00831356	0.965	Intraflagellar transport protein 172 homolog
ABCD3	-0.878	0.00046703	0.875	ATP-binding cassette sub-family D member 3
ANXA8L2	-0.88	0.0117762	0.97	Annexin A8-like protein 2
DYNLL1	-0.882	0.00481109	0.955	Dynein light chain 1, cytoplasmic
PAPSS1	-0.885	0.0109171	0.969	Bifunctional 3-phosphoadenosine 5-phosphosulfate synthase 1;Sulfate adenylyltransferase;Adenylyl-sulfate kinase
C14orf166	-0.889	0.00975446	0.967	UPF0568 protein C14orf166
ARPC2	-0.89	0.0113202	0.969	Actin-related protein 2/3 complex subunit 2
KPNA6	-0.902	0.0425133	0.982	Importin subunit alpha-7;Importin subunit alpha-6
LHPP	-0.903	0.0348508	0.981	Phospholysine phosphohistidine inorganic pyrophosphate phosphatase
C11orf54	-0.907	0.000247047	0.835	Ester hydrolase C11orf54
RPS4X	-0.907	0.019761	0.976	40S ribosomal protein S4, X isoform
DDX1	-0.908	0.00520024	0.957	ATP-dependent RNA helicase DDX1
CYP4B1	-0.923	6.51236e-05	0.713	Cytochrome P450 4B1
GSK3B	-0.935	0.00125144	0.919	Glycogen synthase kinase-3 beta
RPL38	-0.946	0.0460573	0.983	60S ribosomal protein L38
ATPIF1	-0.947	0.00983762	0.967	ATPase inhibitor, mitochondrial
GOT1	-0.948	0.0168284	0.974	Aspartate aminotransferase, cytoplasmic
QARS	-0.953	0.00325569	0.947	Glutamine--tRNA ligase
ARHGAP18	-0.955	0.0113265	0.969	Rho GTPase-activating protein 18
AKR1B1	-0.965	1.85338e-06	0.221	Aldose reductase
NME5	-0.967	0.011322	0.969	Nucleoside diphosphate kinase homolog 5
COX6B1	-0.968	0.00122573	0.919	Cytochrome c oxidase subunit 6B1
LLGL2	-0.968	0.000870746	0.905	Lethal(2) giant larvae protein homolog 2
ATP5F1	-0.972	0.0402773	0.982	ATP synthase F(0) complex subunit B1, mitochondrial
PYCARD	-0.973	0.000594127	0.888	Apoptosis-associated speck-like protein containing a CARD
SLC44A4	-0.973	0.0174856	0.974	Choline transporter-like protein 4
RSPH9	-0.976	0.00144379	0.924	Radial spoke head protein 9 homolog
DHX9	-0.988	0.00268042	0.942	ATP-dependent RNA helicase A
RPS15	-1	0.000137966	0.789	40S ribosomal protein S15
EFTUD2	-1.01	0.0158046	0.973	116 kDa U5 small nuclear ribonucleoprotein component
PITRM1	-1.01	0.00552397	0.958	Presequence protease, mitochondrial
STAT3	-1.02	5.8013e-05	0.7	Signal transducer and activator of transcription 3
MTCH2	-1.03	0.00679809	0.961	Mitochondrial carrier homolog 2
ARF1	-1.04	0.0214165	0.976	ADP-ribosylation factor 1;ADP-ribosylation factor 3
CSNK2A1	-1.04	0.00990672	0.967	Casein kinase II subunit alpha;Casein kinase II subunit alpha 3
PPP1CA	-1.04	0.0260185	0.978	Serine/threonine-protein phosphatase PP1-alpha catalytic subunit
ACTA1	-1.05	0.0341064	0.981	Actin, alpha skeletal muscle;Actin, alpha cardiac muscle 1;Actin, gamma-enteric smooth muscle;Actin, aortic smooth muscle
NAGK	-1.05	0.00539422	0.957	N-acetyl-D-glucosamine kinase
PRKDC	-1.07	0.000553779	0.884	DNA-dependent protein kinase catalytic subunit
SNRPA1	-1.07	0.000872527	0.905	U2 small nuclear ribonucleoprotein A
PRKRA	-1.08	0.00881592	0.966	Interferon-inducible double-stranded RNA-dependent protein kinase activator A
CFAP52	-1.1	0.000627281	0.89	Cilia- and flagella-associated protein 52
UGDH	-1.12	0.000705159	0.896	UDP-glucose 6-dehydrogenase
HSPA4L	-1.15	0.00679161	0.961	Heat shock 70 kDa protein 4L
RPS13	-1.15	0.0250187	0.978	40S ribosomal protein S13
SET	-1.16	0.020752	0.976	Protein SET
COPG2	-1.17	0.00159925	0.928	Coatomer subunit gamma-2
GBP6	-1.17	0.003763	0.95	Guanylate-binding protein 6
RPN2	-1.17	0.013792	0.972	Dolichyl-diphosphooligosaccharide--protein glycosyltransferase subunit 2
DNAH9	-1.18	0.00804715	0.964	Dynein heavy chain 9, axonemal
PTGR1	-1.18	0.0307401	0.98	Prostaglandin reductase 1
SNRNP200	-1.18	0.00789067	0.964	U5 small nuclear ribonucleoprotein 200 kDa helicase
CORO7	-1.2	2.42453e-07	0.0627	Coronin-7
PSME2	-1.22	0.0347803	0.981	Proteasome activator complex subunit 2
MB	-1.24	0.0201004	0.976	Myoglobin
METTL7A	-1.26	9.85503e-05	0.757	Methyltransferase-like protein 7A
SPRR1A	-1.28	3.06288e-09	0.00316	Cornifin-A
ABHD11	-1.28	0.0013186	0.921	Alpha/beta hydrolase domain-containing protein 11
NUCB2	-1.28	0.0069266	0.962	Nucleobindin-2;Nesfatin-1
SYNE1	-1.28	0.00338892	0.948	Nesprin-1
RSPH1	-1.29	0.000104734	0.763	Radial spoke head 1 homolog
TKT	-1.29	0.0471034	0.983	Transketolase
PSMD1	-1.31	0.00559466	0.958	26S proteasome non-ATPase regulatory subunit 1
S100A14	-1.33	0.00189753	0.933	Protein S100-A14
ARMC4	-1.35	1.44587e-05	0.511	Armadillo repeat-containing protein 4
C1orf87	-1.35	0.000271349	0.842	Uncharacterized protein C1orf87
G6PD	-1.38	0.00138477	0.923	Glucose-6-phosphate 1-dehydrogenase
PDE4D	-1.38	0.00199302	0.934	cAMP-specific 3,5-cyclic phosphodiesterase 4D
AKR1B10	-1.39	0.000111923	0.769	Aldo-keto reductase family 1 member B10
S100A11	-1.39	0.00138712	0.923	Protein S100-A11;Protein S100-A11, N-terminally processed
LCN2	-1.41	0.00339362	0.948	Neutrophil gelatinase-associated lipocalin
PPOX	-1.44	0.00044886	0.873	Protoporphyrinogen oxidase
SPRR3	-1.44	0.0254894	0.978	Small proline-rich protein 3
UPF1	-1.45	0.000114879	0.772	Regulator of nonsense transcripts 1
SAMHD1	-1.48	0.00129539	0.92	Deoxynucleoside triphosphate triphosphohydrolase SAMHD1
IPO4	-1.51	0.000154762	0.799	Importin-4
AGR3	-1.52	0.00417859	0.952	Anterior gradient protein 3 homolog
OLA1	-1.54	3.2736e-05	0.628	Obg-like ATPase 1
DYNC2H1	-1.6	0.000513977	0.88	Cytoplasmic dynein 2 heavy chain 1
S100A6	-1.6	0.0267987	0.979	Protein S100-A6
SERPINB6	-1.6	0.0446586	0.983	Serpin B6
ALDH3A2	-1.62	3.95728e-05	0.653	Fatty aldehyde dehydrogenase
SOD1	-1.73	0.000137207	0.788	Superoxide dismutase [Cu-Zn]
CD9	-1.76	0.000592641	0.888	CD9 antigen
NQO1	-1.8	0.00801169	0.964	NAD(P)H dehydrogenase [quinone] 1
S100A8	-1.81	0.00621442	0.96	Protein S100-A8;Protein S100-A8, N-terminally processed
GSR	-1.82	0.0298485	0.98	Glutathione reductase, mitochondrial
ALDH3B1	-1.85	0.000158194	0.801	Aldehyde dehydrogenase family 3 member B1
RPLP2	-1.88	0.0272567	0.979	60S acidic ribosomal protein P2
HADH	-1.89	0.0086233	0.965	Hydroxyacyl-coenzyme A dehydrogenase, mitochondrial
SPAG6	-1.92	7.50868e-06	0.412	Sperm-associated antigen 6
GNB2L1	-1.98	0.0103144	0.968	Guanine nucleotide-binding protein subunit beta-2-like 1;Guanine nucleotide-binding protein subunit beta-2-like 1, N-terminally processed
SLC27A2	-2.07	1.07552e-06	0.164	Very long-chain acyl-CoA synthetase
EPHX1	-2.19	0.00509859	0.956	Epoxide hydrolase 1
ADH7	-2.21	5.51153e-05	0.694	Alcohol dehydrogenase class 4 mu/sigma chain
ALDH3A1	-2.28	0.000232106	0.831	Aldehyde dehydrogenase, dimeric NADP-preferring
ALDH1A1	-2.3	0.00941018	0.967	Retinal dehydrogenase 1
GSTA1	-2.32	1.69805e-07	0.0494	Glutathione S-transferase A1;Glutathione S-transferase A1, N-terminally processed
CES1	-2.35	0.00621375	0.96	Liver carboxylesterase 1
S100A9	-2.37	0.0011548	0.916	Protein S100-A9
DNAH5	-2.59	2.96348e-05	0.614	Dynein heavy chain 5, axonemal

## Sheet: CF_NH.vs.CF_NN_PAIR 4
CF_NH.vs.CF_NN [PAIR 4]
Protein	logFC	Pvalue	P.adj	protein_name
NDRG1	6.61	1.14386e-21	1	Protein NDRG1
MUC5B	4.41	5.9957e-08	1	Mucin-5B
ACTB	3.53	5.22011e-06	1	Actin, cytoplasmic 1;Actin, cytoplasmic 1, N-terminally processed
MT1X	3.25	9.18157e-05	1	Metallothionein-1X
DPYD	2.57	1.33471e-09	1	Dihydropyrimidine dehydrogenase [NADP(+)]
TGM2	2.46	0.000531776	1	Protein-glutamine gamma-glutamyltransferase 2
FSCN1	2.34	8.41823e-11	1	Fascin
LGALS1	2.25	8.10598e-05	1	Galectin-1
PACSIN2	2.23	1.32066e-06	1	Protein kinase C and casein kinase substrate in neurons protein 2
PRPF38B	2.13	0.00153443	1	Pre-mRNA-splicing factor 38B
VIM	2.12	0.00462339	1	Vimentin
LOXL4	2.1	3.63818e-10	1	Lysyl oxidase homolog 4
MT2A	1.97	2.91796e-06	1	Metallothionein-2
CYLD	1.79	0.00010306	1	Ubiquitin carboxyl-terminal hydrolase CYLD
ITGAV	1.75	0.000180088	1	Integrin alpha-V;Integrin alpha-V heavy chain;Integrin alpha-V light chain
FHL2	1.73	4.95636e-06	1	Four and a half LIM domains protein 2
H1F0	1.66	5.4682e-06	1	Histone H1.0;Histone H1.0, N-terminally processed
LAD1	1.62	0.000723396	1	Ladinin-1
SPINT1	1.62	2.6472e-06	1	Kunitz-type protease inhibitor 1
ZBTB33	1.61	6.28477e-06	1	Transcriptional regulator Kaiso
ARID5B	1.58	0.000284395	1	AT-rich interactive domain-containing protein 5B
P4HA1	1.58	3.31575e-09	1	Prolyl 4-hydroxylase subunit alpha-1
AFF4	1.57	7.22821e-06	1	AF4/FMR2 family member 4
RRBP1	1.55	1.21978e-07	1	Ribosome-binding protein 1
TRIP6	1.52	0.000322251	1	Thyroid receptor-interacting protein 6
DSG2	1.48	2.67889e-05	1	Desmoglein-2
SLC39A10	1.45	8.58372e-05	1	Zinc transporter ZIP10
WDR33	1.43	6.49848e-07	1	pre-mRNA 3 end processing protein WDR33
ZYX	1.41	3.60073e-05	1	Zyxin
HSPG2	1.4	0.000193947	1	Basement membrane-specific heparan sulfate proteoglycan core protein;Endorepellin;LG3 peptide
CEP104	1.38	0.000212137	1	Centrosomal protein of 104 kDa
VAMP8	1.38	2.9545e-05	1	Vesicle-associated membrane protein 8
F3	1.37	7.10305e-06	1	Tissue factor
HIST1H1D	1.37	0.00133554	1	Histone H1.3
SLC16A3	1.33	2.6561e-08	1	Monocarboxylate transporter 4
CEP170	1.32	7.76797e-06	1	Centrosomal protein of 170 kDa
ERO1L	1.32	7.62467e-05	1	ERO1-like protein alpha
HMGN3	1.32	0.00239308	1	High mobility group nucleosome-binding domain-containing protein 3
NDUFB6	1.32	2.6884e-05	1	NADH dehydrogenase [ubiquinone] 1 beta subcomplex subunit 6
EIF4EBP2	1.3	7.82414e-05	1	Eukaryotic translation initiation factor 4E-binding protein 2
FLNA	1.3	1.03154e-06	1	Filamin-A
LSM5	1.3	0.0016314	1	U6 snRNA-associated Sm-like protein LSm5
PPA1	1.3	0.00044555	1	Inorganic pyrophosphatase
PRKCA	1.29	4.94506e-05	1	Protein kinase C alpha type
APOL2	1.28	4.64433e-05	1	Apolipoprotein L2
IRGQ	1.28	1.82942e-06	1	Immunity-related GTPase family Q protein
PDXDC1	1.28	0.00105738	1	Pyridoxal-dependent decarboxylase domain-containing protein 1
SRPRB	1.28	5.93593e-06	1	Signal recognition particle receptor subunit beta
C3	1.26	0.0483855	1	Complement C3;Complement C3 beta chain;C3-beta-c;Complement C3 alpha chain;C3a anaphylatoxin;Acylation stimulating protein;Complement C3b alpha chain;Complement C3c alpha chain fragment 1;Complement C3dg fragment;Complement C3g fragment;Complement C3d fragment;Complement C3f fragment;Complement C3c alpha chain fragment 2
MUC5AC	1.26	0.0396428	1	Mucin-5AC
WFDC2	1.25	0.00126924	1	WAP four-disulfide core domain protein 2
PHF3	1.22	9.13198e-07	1	PHD finger protein 3
STK24	1.22	1.33063e-07	1	Serine/threonine-protein kinase 24;Serine/threonine-protein kinase 24 36 kDa subunit;Serine/threonine-protein kinase 24 12 kDa subunit
ASS1	1.21	3.16138e-06	1	Argininosuccinate synthase
RRP12	1.21	0.000204419	1	RRP12-like protein
SH3BGRL3	1.21	1.83883e-05	1	SH3 domain-binding glutamic acid-rich-like protein 3
TXNDC17	1.2	1.63668e-05	1	Thioredoxin domain-containing protein 17
NDUFA7	1.19	4.18713e-05	1	NADH dehydrogenase [ubiquinone] 1 alpha subcomplex subunit 7
CPD	1.18	0.000258774	1	Carboxypeptidase D
LSP1	1.18	0.00161074	1	Lymphocyte-specific protein 1
SRGAP3	1.18	6.07325e-06	1	SLIT-ROBO Rho GTPase-activating protein 3
CAV1	1.17	1.40413e-08	1	Caveolin-1
PRKX	1.17	2.15785e-05	1	cAMP-dependent protein kinase catalytic subunit PRKX
PSMA1	1.17	2.9406e-05	1	Proteasome subunit alpha type-1
STAU1	1.17	0.000589942	1	Double-stranded RNA-binding protein Staufen homolog 1
AP1S1	1.16	1.55843e-07	1	AP-1 complex subunit sigma-1A
LAGE3	1.16	9.0158e-06	1	EKC/KEOPS complex subunit LAGE3
SLC12A2	1.16	0.000571541	1	Solute carrier family 12 member 2
LPP	1.14	0.000213161	1	Lipoma-preferred partner
ST14	1.14	9.18152e-05	1	Suppressor of tumorigenicity 14 protein
LRRFIP1	1.13	0.00198267	1	Leucine-rich repeat flightless-interacting protein 1
RRAS2	1.12	1.45064e-07	1	Ras-related protein R-Ras2
SOD2	1.12	0.0113143	1	Superoxide dismutase [Mn], mitochondrial
BBS2	1.11	3.01676e-05	1	Bardet-Biedl syndrome 2 protein
CAPZA2	1.11	0.000216813	1	F-actin-capping protein subunit alpha-2
RPS21	1.1	0.00122656	1	40S ribosomal protein S21
ALDOA	1.09	3.66031e-11	1	Fructose-bisphosphate aldolase A
HMGN4	1.09	0.0171243	1	High mobility group nucleosome-binding domain-containing protein 4
NDUFA2	1.09	0.00248479	1	NADH dehydrogenase [ubiquinone] 1 alpha subcomplex subunit 2
ROCK2	1.09	1.7908e-06	1	Rho-associated protein kinase 2
DDT	1.08	0.00456484	1	D-dopachrome decarboxylase;D-dopachrome decarboxylase-like protein
PAK2	1.08	0.000990034	1	Serine/threonine-protein kinase PAK 2;PAK-2p27;PAK-2p34
RPS10	1.08	0.00113342	1	40S ribosomal protein S10;Putative 40S ribosomal protein S10-like
PHPT1	1.07	2.39922e-05	1	14 kDa phosphohistidine phosphatase
GLTP	1.06	0.00224281	1	Glycolipid transfer protein
RRM1	1.06	0.000788132	1	Ribonucleoside-diphosphate reductase large subunit
TEKT3	1.06	2.36598e-05	1	Tektin-3
ALOX15B	1.05	0.00477606	1	Arachidonate 15-lipoxygenase B
BPIFA1	1.05	0.0023918	1	BPI fold-containing family A member 1
CDV3	1.05	4.85889e-05	1	Protein CDV3 homolog
HIGD1A	1.05	2.4573e-05	1	HIG1 domain family member 1A, mitochondrial
MIF	1.05	6.11365e-05	1	Macrophage migration inhibitory factor
ARHGDIB	1.04	0.00227608	1	Rho GDP-dissociation inhibitor 2
CEP131	1.04	1.17158e-05	1	Centrosomal protein of 131 kDa
UAP1	1.04	8.65689e-05	1	UDP-N-acetylhexosamine pyrophosphorylase;UDP-N-acetylgalactosamine pyrophosphorylase;UDP-N-acetylglucosamine pyrophosphorylase
EIF3J	1.03	0.000608175	1	Eukaryotic translation initiation factor 3 subunit J
NEDD8	1.03	0.00280279	1	NEDD8
BID	1.02	1.75596e-05	1	BH3-interacting domain death agonist;BH3-interacting domain death agonist p15;BH3-interacting domain death agonist p13;BH3-interacting domain death agonist p11
GNL3	1.02	1.48434e-07	1	Guanine nucleotide-binding protein-like 3
SEC22B	1.02	0.000120972	1	Vesicle-trafficking protein SEC22b
TUBB2A	1.02	4.9888e-08	1	Tubulin beta-2A chain
EXOC4	1.01	0.000289216	1	Exocyst complex component 4
IMUP	1.01	0.00125727	1	Immortalization up-regulated protein
IRF2BP2	1.01	8.56005e-06	1	Interferon regulatory factor 2-binding protein 2
PALLD	1.01	3.13241e-06	1	Palladin
ITGA6	0.994	0.0464119	1	Integrin alpha-6;Integrin alpha-6 heavy chain;Integrin alpha-6 light chain;Processed integrin alpha-6
GLIPR2	0.989	0.00973044	1	Golgi-associated plant pathogenesis-related protein 1
TUBB	0.981	6.58816e-06	1	Tubulin beta chain
TPM1	0.978	0.000585231	1	Tropomyosin alpha-1 chain
ACSF2	0.97	9.03087e-08	1	Acyl-CoA synthetase family member 2, mitochondrial
GYS1	0.965	6.65213e-07	1	Glycogen [starch] synthase, muscle
NOLC1	0.965	0.0107502	1	Nucleolar and coiled-body phosphoprotein 1
ANXA3	0.962	2.33259e-05	1	Annexin A3
NUP88	0.961	0.000292682	1	Nuclear pore complex protein Nup88
ALDH1A3	0.958	0.000364405	1	Aldehyde dehydrogenase family 1 member A3
GMFB	0.955	0.00143131	1	Glia maturation factor beta
PSMB10	0.955	0.000250326	1	Proteasome subunit beta type-10
PHF21A	0.952	2.12894e-05	1	PHD finger protein 21A
CARHSP1	0.95	0.00650637	1	Calcium-regulated heat stable protein 1
SPATS2L	0.949	0.0106448	1	SPATS2-like protein
DBT	0.947	2.37446e-05	1	Lipoamide acyltransferase component of branched-chain alpha-keto acid dehydrogenase complex, mitochondrial
IGFBP2	0.945	0.00407647	1	Insulin-like growth factor-binding protein 2
RIOK3	0.942	0.00181034	1	Serine/threonine-protein kinase RIO3
CNBP	0.941	0.0167002	1	Cellular nucleic acid-binding protein
ARPP19	0.932	0.0017078	1	cAMP-regulated phosphoprotein 19
ADPGK	0.926	1.88396e-05	1	ADP-dependent glucokinase
CBX1	0.926	0.0292537	1	Chromobox protein homolog 1
ARHGEF5	0.92	6.6532e-05	1	Rho guanine nucleotide exchange factor 5
HSPA6	0.92	0.000310979	1	Heat shock 70 kDa protein 6
DBNL	0.919	2.24795e-06	1	Drebrin-like protein
RETSAT	0.916	0.000180342	1	All-trans-retinol 13,14-reductase
MAP4	0.915	3.59582e-06	1	Microtubule-associated protein 4
RPS17	0.914	0.0339929	1	40S ribosomal protein S17
AHCYL2	0.912	1.76614e-06	1	Putative adenosylhomocysteinase 3
WIBG	0.912	0.000641977	1	Partner of Y14 and mago
CAPN13	0.911	0.0192574	1	Calpain-13
QDPR	0.911	0.00036164	1	Dihydropteridine reductase
FAM49B	0.906	5.66012e-05	1	Protein FAM49B
HDLBP	0.905	1.46472e-06	1	Vigilin
MAPRE1	0.901	4.07533e-05	1	Microtubule-associated protein RP/EB family member 1
SRRM1	0.901	0.00109144	1	Serine/arginine repetitive matrix protein 1
THEM6	0.901	3.4476e-06	1	Protein THEM6
NUCB1	0.898	0.00807847	1	Nucleobindin-1
GALNT7	0.895	6.37473e-05	1	N-acetylgalactosaminyltransferase 7
TPM4	0.892	4.87864e-06	1	Tropomyosin alpha-4 chain
CXCL1	0.889	9.24627e-06	1	Growth-regulated alpha protein;GRO-alpha(4-73);GRO-alpha(5-73);GRO-alpha(6-73)
LDLRAD1	0.881	1.30545e-05	1	Low-density lipoprotein receptor class A domain-containing protein 1
SEPT9	0.878	0.000284008	1	Septin-9
MYO1C	0.875	0.000172339	1	Unconventional myosin-Ic
SIAE	0.875	1.29771e-05	1	Sialate O-acetylesterase
PPP1R8	0.873	0.000142036	1	Nuclear inhibitor of protein phosphatase 1;Activator of RNA decay
TMCO1	0.869	6.77431e-06	1	Transmembrane and coiled-coil domain-containing protein 1
AGRN	0.866	0.000994967	1	Agrin;Agrin N-terminal 110 kDa subunit;Agrin C-terminal 110 kDa subunit;Agrin C-terminal 90 kDa fragment;Agrin C-terminal 22 kDa fragment
TACSTD2	0.865	0.000238488	1	Tumor-associated calcium signal transducer 2
CPOX	0.862	9.14738e-05	1	Oxygen-dependent coproporphyrinogen-III oxidase, mitochondrial
TMED9	0.86	0.0220919	1	Transmembrane emp24 domain-containing protein 9
KRAS	0.853	1.72763e-06	1	GTPase KRas;GTPase KRas, N-terminally processed
SSNA1	0.85	3.35101e-05	1	Sjoegren syndrome nuclear autoantigen 1
IQUB	0.84	0.0004264	1	IQ and ubiquitin-like domain-containing protein
RPS26	0.834	0.00192215	1	40S ribosomal protein S26;Putative 40S ribosomal protein S26-like 1
DUT	0.832	5.88724e-05	1	Deoxyuridine 5-triphosphate nucleotidohydrolase, mitochondrial
SIRT5	0.831	0.00112098	1	NAD-dependent protein deacylase sirtuin-5, mitochondrial
ATP6V1D	0.826	4.01801e-05	1	V-type proton ATPase subunit D
MRPS34	0.826	0.00011644	1	28S ribosomal protein S34, mitochondrial
PSMD6	0.825	0.0241212	1	26S proteasome non-ATPase regulatory subunit 6
HTRA2	0.823	4.72238e-05	1	Serine protease HTRA2, mitochondrial
IFT57	0.822	0.000122597	1	Intraflagellar transport protein 57 homolog
PTK2	0.822	0.00010856	1	Focal adhesion kinase 1
CELF1	0.821	0.0138453	1	CUGBP Elav-like family member 1
GLO1	0.817	0.00433104	1	Lactoylglutathione lyase
DYNC1I2	0.815	0.00257536	1	Cytoplasmic dynein 1 intermediate chain 2
COX4I1	0.813	0.0129977	1	Cytochrome c oxidase subunit 4 isoform 1, mitochondrial
IPO9	0.81	0.00125013	1	Importin-9
POFUT1	0.81	0.00015406	1	GDP-fucose protein O-fucosyltransferase 1
KIAA1598	0.808	1.51918e-05	1	Shootin-1
NUFIP2	0.798	8.3777e-05	1	Nuclear fragile X mental retardation-interacting protein 2
YWHAB	0.798	2.03212e-05	1	14-3-3 protein beta/alpha;14-3-3 protein beta/alpha, N-terminally processed
TLN1	0.795	0.00238177	1	Talin-1
ACAA1	0.793	0.00919933	1	3-ketoacyl-CoA thiolase, peroxisomal
MRPS5	0.791	0.00153	1	28S ribosomal protein S5, mitochondrial
PPP1R14B	0.791	2.64885e-06	1	Protein phosphatase 1 regulatory subunit 14B
STAT2	0.79	3.19214e-05	1	Signal transducer and activator of transcription 2
TCEB3	0.786	0.000145149	1	Transcription elongation factor B polypeptide 3
EPB41L1	0.783	0.000289895	1	Band 4.1-like protein 1
APP	0.782	0.0293553	1	Amyloid beta A4 protein;N-APP;Soluble APP-alpha;Soluble APP-beta;C99;Beta-amyloid protein 42;Beta-amyloid protein 40;C83;P3(42);P3(40);C80;Gamma-secretase C-terminal fragment 59;Gamma-secretase C-terminal fragment 57;Gamma-secretase C-terminal fragment 50;C31
HIST2H2AB	0.782	0.0206994	1	Histone H2A type 2-B
WASF2	0.782	0.0030301	1	Wiskott-Aldrich syndrome protein family member 2
POF1B	0.779	0.00821321	1	Protein POF1B
RTN3	0.778	0.000725953	1	Reticulon-3
ANKS1A	0.777	0.00195231	1	Ankyrin repeat and SAM domain-containing protein 1A
LGALS7	0.777	0.011346	1	Galectin-7
TRMT1L	0.776	0.00714251	1	TRMT1-like protein
IFT27	0.775	0.0155907	1	Intraflagellar transport protein 27 homolog
SERPINH1	0.774	0.0047538	1	Serpin H1
ACO1	0.773	2.26849e-05	1	Cytoplasmic aconitate hydratase
BSG	0.772	0.00283995	1	Basigin
HTATSF1	0.772	0.00271419	1	HIV Tat-specific factor 1
ITGB4	0.771	0.00115282	1	Integrin beta-4
RHOG	0.771	2.45523e-05	1	Rho-related GTP-binding protein RhoG
VCL	0.771	0.000498319	1	Vinculin
AHI1	0.769	0.00328325	1	Jouberin
TWF1	0.768	0.00017341	1	Twinfilin-1
GALK1	0.767	0.00395441	1	Galactokinase
TNKS1BP1	0.76	0.000259874	1	182 kDa tankyrase-1-binding protein
BPGM	0.759	0.00183783	1	Bisphosphoglycerate mutase
STRBP	0.759	0.000266243	1	Spermatid perinuclear RNA-binding protein
TMEM173	0.757	0.021604	1	Stimulator of interferon genes protein
RPS25	0.756	0.00790561	1	40S ribosomal protein S25
UTRN	0.755	3.58636e-05	1	Utrophin
FLNB	0.752	6.84565e-07	1	Filamin-B
PHF6	0.747	0.000137652	1	PHD finger protein 6
CASP1	0.746	0.0289214	1	Caspase-1;Caspase-1 subunit p20;Caspase-1 subunit p10
PPP1R13L	0.746	0.000527779	1	RelA-associated inhibitor
GSTT1	0.745	0.000955728	1	Glutathione S-transferase theta-1
ERBB2	0.737	0.000437703	1	Receptor tyrosine-protein kinase erbB-2
PCNP	0.737	0.00590306	1	PEST proteolytic signal-containing nuclear protein
PMPCB	0.735	0.00443419	1	Mitochondrial-processing peptidase subunit beta
CAPZA1	0.733	0.000949826	1	F-actin-capping protein subunit alpha-1
NUDT21	0.731	0.00539663	1	Cleavage and polyadenylation specificity factor subunit 5
EFHC2	0.73	0.000338989	1	EF-hand domain-containing family member C2
GNPNAT1	0.729	0.00169688	1	Glucosamine 6-phosphate N-acetyltransferase
NMES1	0.728	0.000135259	1	Normal mucosa of esophagus-specific gene 1 protein
PDCD11	0.728	0.00949558	1	Protein RRP5 homolog
ACOX1	0.726	7.90752e-05	1	Peroxisomal acyl-coenzyme A oxidase 1
LYZ	0.725	0.00403799	1	Lysozyme C
CCDC173	0.722	0.000299035	1	Coiled-coil domain-containing protein 173
CHMP2A	0.722	0.000196584	1	Charged multivesicular body protein 2a
SLC3A2	0.722	0.000609529	1	4F2 cell-surface antigen heavy chain
KDSR	0.721	9.53692e-05	1	3-ketodihydrosphingosine reductase
RFX3	0.721	2.4437e-05	1	Transcription factor RFX3
EXOC5	0.72	8.26897e-06	1	Exocyst complex component 5
RMDN3	0.72	0.0013863	1	Regulator of microtubule dynamics protein 3
LAMTOR5	0.719	0.000310799	1	Ragulator complex protein LAMTOR5
SORD	0.718	0.000784844	1	Sorbitol dehydrogenase
PLEKHS1	0.712	0.0127898	1	Pleckstrin homology domain-containing family S member 1
DCAF7	0.707	0.000258231	1	DDB1- and CUL4-associated factor 7
PTPRF	0.706	0.000144661	1	Receptor-type tyrosine-protein phosphatase F
ISOC1	0.701	0.0118621	1	Isochorismatase domain-containing protein 1
RPL9	0.693	0.00963969	1	60S ribosomal protein L9
HN1L	0.692	0.0110113	1	Hematological and neurological expressed 1-like protein
PRDX4	0.691	0.0135293	1	Peroxiredoxin-4
TNRC6B	0.69	0.000256953	1	Trinucleotide repeat-containing gene 6B protein
NMNAT1	0.688	9.46439e-05	1	Nicotinamide/nicotinic acid mononucleotide adenylyltransferase 1
CLINT1	0.686	0.000480531	1	Clathrin interactor 1
ASPH	0.685	0.016406	1	Aspartyl/asparaginyl beta-hydroxylase
PPP6C	0.684	0.00290867	1	Serine/threonine-protein phosphatase 6 catalytic subunit;Serine/threonine-protein phosphatase 6 catalytic subunit, N-terminally processed
ACYP1	0.683	9.51478e-06	1	Acylphosphatase-1
AGFG1	0.683	0.0123909	1	Arf-GAP domain and FG repeat-containing protein 1
ATP6V1B2	0.681	0.0149998	1	V-type proton ATPase subunit B, brain isoform
CASP3	0.68	0.000221738	1	Caspase-3;Caspase-3 subunit p17;Caspase-3 subunit p12
LY75	0.68	0.0003698	1	Lymphocyte antigen 75
CCDC12	0.679	0.00300998	1	Coiled-coil domain-containing protein 12
LARP7	0.679	0.000312857	1	La-related protein 7
SH3GL1	0.678	4.4925e-05	1	Endophilin-A2
TXNDC5	0.678	0.00656116	1	Thioredoxin domain-containing protein 5
CDC42EP4	0.677	0.00314682	1	Cdc42 effector protein 4
RAVER2	0.677	0.0129671	1	Ribonucleoprotein PTB-binding 2
TOM1	0.675	0.0197303	1	Target of Myb protein 1
PHB	0.674	0.0141809	1	Prohibitin
MRPS35	0.673	0.000303082	1	28S ribosomal protein S35, mitochondrial
PSMD14	0.673	0.024997	1	26S proteasome non-ATPase regulatory subunit 14
MTDH	0.669	0.00178438	1	Protein LYRIC
WAC	0.669	0.00151785	1	WW domain-containing adapter protein with coiled-coil
NIF3L1	0.668	0.00043917	1	NIF3-like protein 1
CMAS	0.667	0.000224434	1	N-acylneuraminate cytidylyltransferase
NDUFA6	0.667	6.04659e-05	1	NADH dehydrogenase [ubiquinone] 1 alpha subcomplex subunit 6
SMARCD2	0.664	0.0118044	1	SWI/SNF-related matrix-associated actin-dependent regulator of chromatin subfamily D member 2
DLST	0.657	0.000811203	1	Dihydrolipoyllysine-residue succinyltransferase component of 2-oxoglutarate dehydrogenase complex, mitochondrial
RBBP9	0.656	0.00107769	1	Putative hydrolase RBBP9
HYPK	0.655	4.4944e-07	1	Huntingtin-interacting protein K
PREB	0.655	0.0050745	1	Prolactin regulatory element-binding protein
METAP2	0.653	0.00835304	1	Methionine aminopeptidase 2
GPS1	0.652	0.00703871	1	COP9 signalosome complex subunit 1
MAPK14	0.652	0.000862595	1	Mitogen-activated protein kinase 14
HP1BP3	0.649	0.017125	1	Heterochromatin protein 1-binding protein 3
STX12	0.642	1.92995e-05	1	Syntaxin-12
TMTC3	0.642	0.000165948	1	Transmembrane and TPR repeat-containing protein 3
CKAP4	0.641	0.000180285	1	Cytoskeleton-associated protein 4
ATAD3B	0.64	0.01087	1	ATPase family AAA domain-containing protein 3B
PTK7	0.64	8.20327e-05	1	Inactive tyrosine-protein kinase 7
SNX18	0.64	0.000546044	1	Sorting nexin-18
SON	0.64	3.79139e-05	1	Protein SON
ZNF717	0.64	0.00167901	1	Zinc finger protein 717
KIAA1217	0.635	0.0441436	1	Sickle tail protein homolog
GUK1	0.632	1.21433e-05	1	Guanylate kinase
APPL1	0.631	0.000104866	1	DCC-interacting protein 13-alpha
COG5	0.631	0.00527305	1	Conserved oligomeric Golgi complex subunit 5
LRPAP1	0.631	0.00185511	1	Alpha-2-macroglobulin receptor-associated protein
AAMDC	0.627	0.0119824	1	Mth938 domain-containing protein
M6PR	0.626	0.00251208	1	Cation-dependent mannose-6-phosphate receptor
SCPEP1	0.625	0.000651364	1	Retinoid-inducible serine carboxypeptidase
YWHAG	0.625	0.00133654	1	14-3-3 protein gamma;14-3-3 protein gamma, N-terminally processed
PKP3	0.624	0.00114528	1	Plakophilin-3
PTMS	0.624	0.0236239	1	Parathymosin
SNX3	0.624	2.95952e-05	1	Sorting nexin-3
AP1M1	0.623	0.00547134	1	AP-1 complex subunit mu-1
LASP1	0.623	0.0201757	1	LIM and SH3 domain protein 1
SUCLA2	0.623	0.0089073	1	Succinyl-CoA ligase [ADP-forming] subunit beta, mitochondrial
CSRP1	0.621	0.00451203	1	Cysteine and glycine-rich protein 1
FKBP1A	0.621	0.00603798	1	Peptidyl-prolyl cis-trans isomerase FKBP1A
NUP214	0.618	0.00505253	1	Nuclear pore complex protein Nup214
SMARCA5	0.616	0.00055106	1	SWI/SNF-related matrix-associated actin-dependent regulator of chromatin subfamily A member 5
RPL26L1	0.612	6.70399e-05	1	60S ribosomal protein L26-like 1
GRIPAP1	0.611	0.0146608	1	GRIP1-associated protein 1
MRPL53	0.611	0.0265053	1	39S ribosomal protein L53, mitochondrial
SEPT8	0.611	0.00349639	1	Septin-8
BOLA2	0.609	0.00164725	1	BolA-like protein 2
SCO1	0.606	1.75075e-05	1	Protein SCO1 homolog, mitochondrial
FAM92B	0.604	0.00218506	1	Protein FAM92B
MNS1	0.602	6.46433e-05	1	Meiosis-specific nuclear structural protein 1
NUP205	0.601	0.00857606	1	Nuclear pore complex protein Nup205
YWHAQ	0.6	0.0432213	1	14-3-3 protein theta
SSH3	0.599	0.00405268	1	Protein phosphatase Slingshot homolog 3
NDUFC2	0.597	0.000569633	1	NADH dehydrogenase [ubiquinone] 1 subunit C2
TIPRL	0.597	0.0273044	1	TIP41-like protein
GK3P	0.596	0.00181413	1	Putative glycerol kinase 3;Glycerol kinase
SLC1A5	0.596	0.00116799	1	Neutral amino acid transporter B(0)
FLOT1	0.595	0.0017014	1	Flotillin-1
STAMBP	0.595	6.69969e-05	1	STAM-binding protein
PBDC1	0.594	0.00397541	1	Protein PBDC1
EPS15	0.593	0.0438641	1	Epidermal growth factor receptor substrate 15
TUBA1C	0.593	0.00562243	1	Tubulin alpha-1C chain
RBMX	0.592	0.0325732	1	RNA-binding motif protein, X chromosome;RNA-binding motif protein, X chromosome, N-terminally processed
ANXA2	0.588	0.00108548	1	Annexin A2;Putative annexin A2-like protein
MRPS22	0.585	0.00445395	1	28S ribosomal protein S22, mitochondrial
RPL28	0.584	0.00298581	1	60S ribosomal protein L28
ATP1A1	0.582	0.00110764	1	Sodium/potassium-transporting ATPase subunit alpha-1
SPCS2	0.582	0.0134403	1	Signal peptidase complex subunit 2
PCNA	0.581	0.00384543	1	Proliferating cell nuclear antigen
PFDN2	0.581	0.00647461	1	Prefoldin subunit 2
UBQLN2	0.579	0.000953356	1	Ubiquilin-2
VPS26A	0.579	0.000196133	1	Vacuolar protein sorting-associated protein 26A
SAFB2	0.577	0.000176757	1	Scaffold attachment factor B2
EMD	0.576	0.0311684	1	Emerin
PPM1A	0.576	0.000339297	1	Protein phosphatase 1A
PPM1H	0.575	0.00344592	1	Protein phosphatase 1H
CWF19L1	0.573	0.000151129	1	CWF19-like protein 1
FARSB	0.572	0.00142246	1	Phenylalanine--tRNA ligase beta subunit
HM13	0.572	0.00222033	1	Minor histocompatibility antigen H13
OXR1	0.572	0.0172289	1	Oxidation resistance protein 1
PXN	0.57	0.0090902	1	Paxillin
RBM10	0.57	6.99907e-07	1	RNA-binding protein 10
GNPDA1	0.569	0.000277622	1	Glucosamine-6-phosphate isomerase 1
SRSF11	0.569	0.00393033	1	Serine/arginine-rich splicing factor 11
RPE	0.563	0.0247483	1	Ribulose-phosphate 3-epimerase
AUH	0.559	0.00199459	1	Methylglutaconyl-CoA hydratase, mitochondrial
NUP98	0.559	0.00288767	1	Nuclear pore complex protein Nup98-Nup96;Nuclear pore complex protein Nup98;Nuclear pore complex protein Nup96
YWHAZ	0.556	0.0341047	1	14-3-3 protein zeta/delta
ASNA1	0.553	0.0170702	1	ATPase ASNA1
RBBP7	0.553	0.0154289	1	Histone-binding protein RBBP7
LRRC48	0.552	0.0206452	1	Leucine-rich repeat-containing protein 48
ACOX3	0.551	0.00109012	1	Peroxisomal acyl-coenzyme A oxidase 3
ACTR3	0.551	0.00436223	1	Actin-related protein 3
HINT1	0.549	0.0200294	1	Histidine triad nucleotide-binding protein 1
PPA2	0.549	0.0480752	1	Inorganic pyrophosphatase 2, mitochondrial
LDHA	0.546	0.0427948	1	L-lactate dehydrogenase A chain
MYO18A	0.545	0.0115928	1	Unconventional myosin-XVIIIa
MAGED2	0.544	0.019709	1	Melanoma-associated antigen D2
PMM2	0.544	0.0121329	1	Phosphomannomutase 2
ACTG1	0.543	0.00671002	1	Actin, cytoplasmic 2;Actin, cytoplasmic 2, N-terminally processed
ACBD3	0.541	0.00533349	1	Golgi resident protein GCP60
ENKUR	0.541	4.10762e-05	1	Enkurin
MTPN	0.541	0.000599188	1	Myotrophin
NFS1	0.539	0.0278438	1	Cysteine desulfurase, mitochondrial
WNK1	0.538	0.00718375	1	Serine/threonine-protein kinase WNK1
CST3	0.537	0.0422722	1	Cystatin-C
TCIRG1	0.537	0.000457381	1	V-type proton ATPase 116 kDa subunit a isoform 3
CORO2A	0.534	0.00463787	1	Coronin-2A
CSDE1	0.532	0.00286636	1	Cold shock domain-containing protein E1
FKBP15	0.532	0.0274383	1	FK506-binding protein 15
CUL5	0.531	0.0133678	1	Cullin-5
CCDC124	0.53	0.0188915	1	Coiled-coil domain-containing protein 124
DNAJB11	0.53	0.00114455	1	DnaJ homolog subfamily B member 11
IFT140	0.53	0.0019267	1	Intraflagellar transport protein 140 homolog
MACROD1	0.53	0.0107756	1	O-acetyl-ADP-ribose deacetylase MACROD1
PDCD5	0.53	0.00284196	1	Programmed cell death protein 5
PDLIM5	0.527	0.00439582	1	PDZ and LIM domain protein 5
RPL29	0.527	0.00422666	1	60S ribosomal protein L29
CFAP57	0.526	0.000876531	1	Cilia- and flagella-associated protein 57
FHAD1	0.526	0.0168812	1	Forkhead-associated domain-containing protein 1
ARMC6	0.525	0.00202137	1	Armadillo repeat-containing protein 6
ZC3H11A	0.521	0.00193794	1	Zinc finger CCCH domain-containing protein 11A
ATP2B4	0.52	0.00420862	1	Plasma membrane calcium-transporting ATPase 4
ANXA5	0.519	0.0248459	1	Annexin A5
TSSC1	0.519	0.00253753	1	Protein TSSC1
YY1	0.519	0.0321201	1	Transcriptional repressor protein YY1
SCRN1	0.516	0.0430757	1	Secernin-1
COG7	0.515	0.000941422	1	Conserved oligomeric Golgi complex subunit 7
TOR1AIP1	0.515	0.00753237	1	Torsin-1A-interacting protein 1
SP3	0.514	0.0114728	1	Transcription factor Sp3
GRPEL1	0.512	0.0153108	1	GrpE protein homolog 1, mitochondrial
AP3D1	0.509	0.0205538	1	AP-3 complex subunit delta-1
DHRS7B	0.509	0.00710016	1	Dehydrogenase/reductase SDR family member 7B
BAP18	0.507	0.0262276	1	Chromatin complexes subunit BAP18
MOB1B	0.505	0.00382724	1	MOB kinase activator 1B;MOB kinase activator 1A
C11orf52	0.502	0.0205064	1	Uncharacterized protein C11orf52
PSMA3	0.498	0.018271	1	Proteasome subunit alpha type-3
RPL12	0.497	0.000417551	1	60S ribosomal protein L12
TCERG1	0.491	0.0139284	1	Transcription elongation regulator 1
PSMD7	0.49	0.0141953	1	26S proteasome non-ATPase regulatory subunit 7
KDM3B	0.488	0.0305356	1	Lysine-specific demethylase 3B
TUBGCP2	0.487	0.0194215	1	Gamma-tubulin complex component 2
NUP160	0.485	0.00424241	1	Nuclear pore complex protein Nup160
SEH1L	0.485	0.00759077	1	Nucleoporin SEH1
TBC1D5	0.485	0.00428512	1	TBC1 domain family member 5
DLGAP4	0.484	0.0229477	1	Disks large-associated protein 4
TCOF1	0.484	0.0284911	1	Treacle protein
GNB1	0.482	0.0192326	1	Guanine nucleotide-binding protein G(I)/G(S)/G(T) subunit beta-1
PIN4	0.481	0.00872366	1	Peptidyl-prolyl cis-trans isomerase NIMA-interacting 4
SCAMP3	0.481	0.00741102	1	Secretory carrier-associated membrane protein 3
GIPC1	0.475	0.00349767	1	PDZ domain-containing protein GIPC1
TES	0.474	0.00105142	1	Testin
TRIM28	0.474	0.0486272	1	Transcription intermediary factor 1-beta
CPT1A	0.473	0.0246012	1	Carnitine O-palmitoyltransferase 1, liver isoform
NEMF	0.473	0.039054	1	Nuclear export mediator factor NEMF
LIMA1	0.47	0.0474527	1	LIM domain and actin-binding protein 1
MYH9	0.468	0.000395876	1	Myosin-9
RPS28	0.468	0.0205607	1	40S ribosomal protein S28
LRRC23	0.467	0.0059221	1	Leucine-rich repeat-containing protein 23
PRKAR1A	0.467	0.00231842	1	cAMP-dependent protein kinase type I-alpha regulatory subunit;cAMP-dependent protein kinase type I-alpha regulatory subunit, N-terminally processed
RABL6	0.467	0.0163096	1	Rab-like protein 6
SRRT	0.467	0.01089	1	Serrate RNA effector molecule homolog
CECR5	0.466	0.0166483	1	Cat eye syndrome critical region protein 5
LANCL2	0.466	0.000533585	1	LanC-like protein 2
EIF4G2	0.465	0.0255763	1	Eukaryotic translation initiation factor 4 gamma 2
VWA8	0.465	0.00229255	1	von Willebrand factor A domain-containing protein 8
PIP4K2C	0.464	0.0232557	1	Phosphatidylinositol 5-phosphate 4-kinase type-2 gamma
SRP19	0.461	0.0257232	1	Signal recognition particle 19 kDa protein
MRPS36	0.458	0.0431913	1	28S ribosomal protein S36, mitochondrial
UBE2V1	0.458	0.0357634	1	Ubiquitin-conjugating enzyme E2 variant 1
AIMP1	0.456	0.0181692	1	Aminoacyl tRNA synthase complex-interacting multifunctional protein 1;Endothelial monocyte-activating polypeptide 2
SRSF9	0.456	0.000537314	1	Serine/arginine-rich splicing factor 9
AP3B1	0.455	0.00200292	1	AP-3 complex subunit beta-1
FXR1	0.455	0.0198914	1	Fragile X mental retardation syndrome-related protein 1
PCBP1	0.453	0.0109383	1	Poly(rC)-binding protein 1
NUP188	0.451	0.0489432	1	Nucleoporin NUP188 homolog
PKM	0.451	0.00506425	1	Pyruvate kinase PKM
TXNDC12	0.451	0.0301164	1	Thioredoxin domain-containing protein 12
ADK	0.45	0.0366059	1	Adenosine kinase
CD2AP	0.45	0.0253012	1	CD2-associated protein
TOR1AIP2	0.447	0.000645583	1	Torsin-1A-interacting protein 2
SEC23IP	0.446	0.0395945	1	SEC23-interacting protein
NDUFS6	0.444	0.0191836	1	NADH dehydrogenase [ubiquinone] iron-sulfur protein 6, mitochondrial
ACAP2	0.442	0.0123727	1	Arf-GAP with coiled-coil, ANK repeat and PH domain-containing protein 2
HOOK1	0.441	0.0146106	1	Protein Hook homolog 1
GNAS	0.44	0.0417824	1	Guanine nucleotide-binding protein G(s) subunit alpha isoforms XLas
PLCD1	0.439	0.00347839	1	1-phosphatidylinositol 4,5-bisphosphate phosphodiesterase delta-1
ECHDC1	0.436	0.0171214	1	Ethylmalonyl-CoA decarboxylase
EPS15L1	0.435	0.00600064	1	Epidermal growth factor receptor substrate 15-like 1
AHCYL1	0.431	0.0331552	1	Putative adenosylhomocysteinase 2
NDUFA4	0.431	0.00691281	1	Cytochrome c oxidase subunit NDUFA4
DCXR	0.43	0.00775634	1	L-xylulose reductase
THUMPD1	0.43	0.0223798	1	THUMP domain-containing protein 1
ARHGDIA	0.429	0.0280759	1	Rho GDP-dissociation inhibitor 1
BRCC3	0.428	0.0116454	1	Lys-63-specific deubiquitinase BRCC36
FYCO1	0.426	0.000888633	1	FYVE and coiled-coil domain-containing protein 1
UACA	0.426	0.0111465	1	Uveal autoantigen with coiled-coil domains and ankyrin repeats
MRI1	0.424	0.00718433	1	Methylthioribose-1-phosphate isomerase
TAPBP	0.424	0.00678469	1	Tapasin
TTC37	0.424	0.0234542	1	Tetratricopeptide repeat protein 37
BCAR1	0.421	0.00681338	1	Breast cancer anti-estrogen resistance protein 1
IFT22	0.421	0.0172414	1	Intraflagellar transport protein 22 homolog
STEAP3	0.419	0.00200614	1	Metalloreductase STEAP3
LMNA	0.418	0.0195855	1	Prelamin-A/C;Lamin-A/C
NUP155	0.416	0.027131	1	Nuclear pore complex protein Nup155
RDH10	0.416	0.00372919	1	Retinol dehydrogenase 10
PGK1	0.414	0.00354205	1	Phosphoglycerate kinase 1
WDR35	0.413	0.0269716	1	WD repeat-containing protein 35
UFD1L	0.409	0.00659332	1	Ubiquitin fusion degradation protein 1 homolog
MCU	0.408	0.0269694	1	Calcium uniporter protein, mitochondrial
PGM2L1	0.408	0.0124562	1	Glucose 1,6-bisphosphate synthase
NDUFV2	0.405	0.0100965	1	NADH dehydrogenase [ubiquinone] flavoprotein 2, mitochondrial
VPS28	0.405	0.0410937	1	Vacuolar protein sorting-associated protein 28 homolog
VAMP3	0.401	0.0240759	1	Vesicle-associated membrane protein 3
RBM39	0.4	0.0245085	1	RNA-binding protein 39
SELH	0.4	0.0192797	1	Selenoprotein H
EIF2B2	0.399	0.0288558	1	Translation initiation factor eIF-2B subunit beta
INPP1	0.398	0.00562615	1	Inositol polyphosphate 1-phosphatase
USO1	0.392	0.00755704	1	General vesicular transport factor p115
CBX3	0.391	0.0108706	1	Chromobox protein homolog 3
RNF213	0.391	0.0166917	1	E3 ubiquitin-protein ligase RNF213
SLC26A2	0.391	0.00959582	1	Sulfate transporter
UROD	0.39	0.0497579	1	Uroporphyrinogen decarboxylase
CISD2	0.389	0.02099	1	CDGSH iron-sulfur domain-containing protein 2
PLXNB2	0.388	0.00358061	1	Plexin-B2
TRMT10C	0.385	0.000922441	1	Mitochondrial ribonuclease P protein 1
ATXN10	0.384	0.0149311	1	Ataxin-10
HEXA	0.384	0.03468	1	Beta-hexosaminidase subunit alpha
EIF3G	0.382	0.0365321	1	Eukaryotic translation initiation factor 3 subunit G
HSP90B1	0.382	0.00392265	1	Endoplasmin
DDX39A	0.381	0.0158242	1	ATP-dependent RNA helicase DDX39A
ETF1	0.378	0.0455792	1	Eukaryotic peptide chain release factor subunit 1
WDR19	0.377	0.031382	1	WD repeat-containing protein 19
PPP6R3	0.374	0.00411652	1	Serine/threonine-protein phosphatase 6 regulatory subunit 3
CUL4B	0.373	0.0126266	1	Cullin-4B
LIMD1	0.373	0.00069893	1	LIM domain-containing protein 1
BRIX1	0.371	0.00934798	1	Ribosome biogenesis protein BRX1 homolog
RPS14	0.371	0.0247743	1	40S ribosomal protein S14
FAM96B	0.37	0.00240883	1	Mitotic spindle-associated MMXD complex subunit MIP18
DARS2	0.367	0.00504308	1	Aspartate--tRNA ligase, mitochondrial
EIF5B	0.367	0.0201509	1	Eukaryotic translation initiation factor 5B
HSD17B10	0.366	0.0224406	1	3-hydroxyacyl-CoA dehydrogenase type-2
CUL1	0.365	0.0108097	1	Cullin-1
MRPS27	0.365	0.0321018	1	28S ribosomal protein S27, mitochondrial
PFN1	0.365	0.033954	1	Profilin-1
PPME1	0.365	0.0409825	1	Protein phosphatase methylesterase 1
THOP1	0.363	0.0428022	1	Thimet oligopeptidase
IFI30	0.36	0.0216777	1	Gamma-interferon-inducible lysosomal thiol reductase
RPL18A	0.358	0.0343694	1	60S ribosomal protein L18a
DGKA	0.357	0.0161644	1	Diacylglycerol kinase alpha
WDR77	0.357	0.00280773	1	Methylosome protein 50
ATXN2L	0.355	0.0112229	1	Ataxin-2-like protein
PDHX	0.354	0.035726	1	Pyruvate dehydrogenase protein X component, mitochondrial
ARFIP1	0.352	0.0403848	1	Arfaptin-1
IFT122	0.352	0.0497055	1	Intraflagellar transport protein 122 homolog
SEPT10	0.35	0.0253547	1	Septin-10
PDS5B	0.346	0.00348266	1	Sister chromatid cohesion protein PDS5 homolog B
NDUFA12	0.345	0.0345422	1	NADH dehydrogenase [ubiquinone] 1 alpha subcomplex subunit 12
RPL19	0.343	0.0482512	1	60S ribosomal protein L19
DLG3	0.342	0.0257573	1	Disks large homolog 3
LIMS1	0.334	0.013948	1	LIM and senescent cell antigen-like-containing domain protein 1
FAM107B	0.333	0.0264094	1	Protein FAM107B
RNMT	0.331	0.0411381	1	mRNA cap guanine-N7 methyltransferase
DPP3	0.329	0.0444621	1	Dipeptidyl peptidase 3
CHMP4B	0.328	0.0475309	1	Charged multivesicular body protein 4b
KIAA1279	0.328	0.0174554	1	KIF1-binding protein
ILK	0.326	0.0199623	1	Integrin-linked protein kinase
PCCB	0.325	0.011322	1	Propionyl-CoA carboxylase beta chain, mitochondrial
ARHGEF1	0.323	0.0189534	1	Rho guanine nucleotide exchange factor 1
UBE2O	0.321	0.0438244	1	E2/E3 hybrid ubiquitin-protein ligase UBE2O
CTTN	0.32	0.0300314	1	Src substrate cortactin
ATG16L1	0.317	0.0184988	1	Autophagy-related protein 16-1
HSPD1	0.316	0.0321639	1	60 kDa heat shock protein, mitochondrial
EIF2A	0.314	0.0332545	1	Eukaryotic translation initiation factor 2A;Eukaryotic translation initiation factor 2A, N-terminally processed
CDC42BPB	0.313	0.020247	1	Serine/threonine-protein kinase MRCK beta
PLEC	0.307	0.0180714	1	Plectin
PPP1R12A	0.307	0.0309115	1	Protein phosphatase 1 regulatory subunit 12A
PSMC2	0.307	0.0216907	1	26S protease regulatory subunit 7
MGST2	0.306	0.0137672	1	Microsomal glutathione S-transferase 2
UBE2M	0.304	0.0132899	1	NEDD8-conjugating enzyme Ubc12
SPTLC1	0.3	0.0485172	1	Serine palmitoyltransferase 1
GSN	0.299	0.0264759	1	Gelsolin
BCAS2	0.29	0.0390085	1	Pre-mRNA-splicing factor SPF27
HSPB1	0.283	0.0424979	1	Heat shock protein beta-1
C1orf123	0.281	0.039182	1	UPF0587 protein C1orf123
NAP1L4	0.281	0.0188497	1	Nucleosome assembly protein 1-like 4
COA3	0.28	0.0251563	1	Cytochrome c oxidase assembly factor 3 homolog, mitochondrial
CYB5B	0.279	0.0392237	1	Cytochrome b5 type B
MPI	0.272	0.0328241	1	Mannose-6-phosphate isomerase
OTUD4	-0.266	0.0119132	1	OTU domain-containing protein 4
RBX1	-0.304	0.0189132	1	E3 ubiquitin-protein ligase RBX1;E3 ubiquitin-protein ligase RBX1, N-terminally processed
KARS	-0.307	0.0463001	1	Lysine--tRNA ligase
TRAPPC8	-0.307	0.0241688	1	Trafficking protein particle complex subunit 8
NUDT4	-0.31	0.0317543	1	Diphosphoinositol polyphosphate phosphohydrolase 2
RAB35	-0.318	0.027714	1	Ras-related protein Rab-35
SF3A3	-0.318	0.0206277	1	Splicing factor 3A subunit 3
BCLAF1	-0.322	0.0438083	1	Bcl-2-associated transcription factor 1
SUPT5H	-0.325	0.0350543	1	Transcription elongation factor SPT5
ERLIN1	-0.326	0.0316555	1	Erlin-1
USP5	-0.328	0.00745495	1	Ubiquitin carboxyl-terminal hydrolase 5
SSB	-0.346	0.0238575	1	Lupus La protein
TACO1	-0.348	0.00861247	1	Translational activator of cytochrome c oxidase 1
IQGAP1	-0.356	0.043748	1	Ras GTPase-activating-like protein IQGAP1
PPIH	-0.362	0.0190366	1	Peptidyl-prolyl cis-trans isomerase H
KTN1	-0.37	0.0238576	1	Kinectin
MGLL	-0.376	0.0330998	1	Monoglyceride lipase
CSTF1	-0.377	0.0211419	1	Cleavage stimulation factor subunit 1
TRIM25	-0.381	0.0341562	1	E3 ubiquitin/ISG15 ligase TRIM25
ENO2	-0.382	0.0220021	1	Gamma-enolase
GBAS	-0.382	0.0327635	1	Protein NipSnap homolog 2
EIF4A1	-0.385	0.0321468	1	Eukaryotic initiation factor 4A-I
HSD17B8	-0.385	0.0417062	1	Estradiol 17-beta-dehydrogenase 8
EPRS	-0.389	0.0174338	1	Bifunctional glutamate/proline--tRNA ligase;Glutamate--tRNA ligase;Proline--tRNA ligase
PRKACA	-0.393	0.00470442	1	cAMP-dependent protein kinase catalytic subunit alpha
SRP72	-0.399	0.0336847	1	Signal recognition particle subunit SRP72
CAMK2D	-0.402	0.0136182	1	Calcium/calmodulin-dependent protein kinase type II subunit delta
DYNC1LI1	-0.403	0.0080607	1	Cytoplasmic dynein 1 light intermediate chain 1
GANAB	-0.407	0.0283538	1	Neutral alpha-glucosidase AB
SPTAN1	-0.412	0.00304962	1	Spectrin alpha chain, non-erythrocytic 1
RANBP1	-0.414	0.0260271	1	Ran-specific GTPase-activating protein
ZC3H18	-0.415	0.000484785	1	Zinc finger CCCH domain-containing protein 18
ATP1B3	-0.418	0.0131722	1	Sodium/potassium-transporting ATPase subunit beta-3
XRCC6	-0.418	0.0055028	1	X-ray repair cross-complementing protein 6
RHOT2	-0.419	0.013288	1	Mitochondrial Rho GTPase 2
TCP1	-0.419	0.0049316	1	T-complex protein 1 subunit alpha
CCT2	-0.434	0.0209751	1	T-complex protein 1 subunit beta
NUP93	-0.435	0.00712483	1	Nuclear pore complex protein Nup93
SEC31A	-0.436	0.0254842	1	Protein transport protein Sec31A
ATP2A2	-0.439	0.00687261	1	Sarcoplasmic/endoplasmic reticulum calcium ATPase 2
CAPZB	-0.442	0.0354492	1	F-actin-capping protein subunit beta
DNPH1	-0.448	0.0450741	1	2-deoxynucleoside 5-phosphate N-hydrolase 1
ETFA	-0.448	0.0338431	1	Electron transfer flavoprotein subunit alpha, mitochondrial
NAPA	-0.45	0.0269749	1	Alpha-soluble NSF attachment protein
SCCPDH	-0.453	0.0311113	1	Saccharopine dehydrogenase-like oxidoreductase
GMPPB	-0.454	0.0201839	1	Mannose-1-phosphate guanyltransferase beta
PRPF40A	-0.459	0.00812117	1	Pre-mRNA-processing factor 40 homolog A
CBR1	-0.461	0.0263333	1	Carbonyl reductase [NADPH] 1
PIGR	-0.461	0.0478367	1	Polymeric immunoglobulin receptor;Secretory component
DSTN	-0.462	0.024753	1	Destrin
ATIC	-0.466	0.041403	1	Bifunctional purine biosynthesis protein PURH;Phosphoribosylaminoimidazolecarboxamide formyltransferase;IMP cyclohydrolase
HSPBP1	-0.471	0.0130922	1	Hsp70-binding protein 1
SCP2	-0.475	0.0394316	1	Non-specific lipid-transfer protein
MUT	-0.477	0.00674515	1	Methylmalonyl-CoA mutase, mitochondrial
TMPO	-0.477	0.0338518	1	Lamina-associated polypeptide 2, isoform alpha;Thymopoietin;Thymopentin
BCL2L13	-0.483	0.0304849	1	Bcl-2-like protein 13
HDHD2	-0.483	0.0150894	1	Haloacid dehalogenase-like hydrolase domain-containing protein 2
HNRNPA3	-0.483	0.00220754	1	Heterogeneous nuclear ribonucleoprotein A3
EXOC1	-0.484	0.0141564	1	Exocyst complex component 1
RBM14	-0.485	0.048395	1	RNA-binding protein 14
PALMD	-0.487	0.0278765	1	Palmdelphin
PQBP1	-0.487	0.000723472	1	Polyglutamine-binding protein 1
RTCA	-0.488	0.0020248	1	RNA 3-terminal phosphate cyclase
CC2D1A	-0.489	0.00194006	1	Coiled-coil and C2 domain-containing protein 1A
ACSS1	-0.492	0.0344458	1	Acetyl-coenzyme A synthetase 2-like, mitochondrial
RPL35	-0.492	0.0288798	1	60S ribosomal protein L35
NAT1	-0.494	0.0461143	1	Arylamine N-acetyltransferase 1
NEK9	-0.495	0.000216411	1	Serine/threonine-protein kinase Nek9
RAVER1	-0.495	0.00739387	1	Ribonucleoprotein PTB-binding 1
HSDL2	-0.496	0.00459796	1	Hydroxysteroid dehydrogenase-like protein 2
PSMC5	-0.501	0.000850256	1	26S protease regulatory subunit 8
IRF6	-0.502	0.00100108	1	Interferon regulatory factor 6
SKP1	-0.504	0.00645728	1	S-phase kinase-associated protein 1
YBX1	-0.506	0.01768	1	Nuclease-sensitive element-binding protein 1
KPNB1	-0.507	0.0144754	1	Importin subunit beta-1
BCAP29	-0.508	0.000271629	1	B-cell receptor-associated protein 29
CCAR1	-0.508	0.0449634	1	Cell division cycle and apoptosis regulator protein 1
NARS	-0.509	0.0473483	1	Asparagine--tRNA ligase, cytoplasmic
GMPS	-0.511	0.0498622	1	GMP synthase [glutamine-hydrolyzing]
DYNC1LI2	-0.512	0.00907932	1	Cytoplasmic dynein 1 light intermediate chain 2
EZR	-0.513	0.00296384	1	Ezrin
NAA40	-0.513	0.0026139	1	N-alpha-acetyltransferase 40
ACADS	-0.514	0.013445	1	Short-chain specific acyl-CoA dehydrogenase, mitochondrial
UCHL3	-0.514	0.00719185	1	Ubiquitin carboxyl-terminal hydrolase isozyme L3
LRRC46	-0.519	0.0487699	1	Leucine-rich repeat-containing protein 46
SUPT16H	-0.525	0.0321562	1	FACT complex subunit SPT16
ABCC1	-0.526	0.00374234	1	Multidrug resistance-associated protein 1
NPC2	-0.526	0.0454068	1	Epididymal secretory protein E1
GALM	-0.53	0.013717	1	Aldose 1-epimerase
USMG5	-0.532	0.00640941	1	Up-regulated during skeletal muscle growth protein 5
USP7	-0.533	0.00785301	1	Ubiquitin carboxyl-terminal hydrolase 7
TUFM	-0.539	0.0135011	1	Elongation factor Tu, mitochondrial
DDX19A	-0.542	0.0232486	1	ATP-dependent RNA helicase DDX19A
TRIM29	-0.547	0.0326014	1	Tripartite motif-containing protein 29
AP1B1	-0.548	0.020967	1	AP-1 complex subunit beta-1
ADAM10	-0.551	0.0195806	1	Disintegrin and metalloproteinase domain-containing protein 10
KPNA3	-0.552	0.0166466	1	Importin subunit alpha-4
SEPT2	-0.552	0.01624	1	Septin-2
HNRNPA1	-0.555	0.00429398	1	Heterogeneous nuclear ribonucleoprotein A1;Heterogeneous nuclear ribonucleoprotein A1, N-terminally processed;Heterogeneous nuclear ribonucleoprotein A1-like 2
MPP7	-0.555	0.0401744	1	MAGUK p55 subfamily member 7
DHRS1	-0.559	0.000430949	1	Dehydrogenase/reductase SDR family member 1
PRDX6	-0.559	0.0407793	1	Peroxiredoxin-6
HSPB11	-0.563	0.00331772	1	Intraflagellar transport protein 25 homolog
BAIAP2L1	-0.566	0.0435947	1	Brain-specific angiogenesis inhibitor 1-associated protein 2-like protein 1
PITPNA	-0.567	0.0172441	1	Phosphatidylinositol transfer protein alpha isoform
DDX39B	-0.568	0.00311045	1	Spliceosome RNA helicase DDX39B
TFG	-0.574	0.00223562	1	Protein TFG
CASK	-0.575	0.0165637	1	Peripheral plasma membrane protein CASK
DIAPH1	-0.576	0.0261507	1	Protein diaphanous homolog 1
ERLEC1	-0.576	0.0481734	1	Endoplasmic reticulum lectin 1
RARS	-0.576	0.0471477	1	Arginine--tRNA ligase, cytoplasmic
MRPL37	-0.582	0.0102118	1	39S ribosomal protein L37, mitochondrial
NDUFV1	-0.586	0.0384054	1	NADH dehydrogenase [ubiquinone] flavoprotein 1, mitochondrial
DHX15	-0.59	0.0150896	1	Pre-mRNA-splicing factor ATP-dependent RNA helicase DHX15
HNRNPF	-0.59	0.00760643	1	Heterogeneous nuclear ribonucleoprotein F;Heterogeneous nuclear ribonucleoprotein F, N-terminally processed
EIF5	-0.591	0.00196348	1	Eukaryotic translation initiation factor 5
PIR	-0.596	0.00508327	1	Pirin
CCDC114	-0.598	0.0120366	1	Coiled-coil domain-containing protein 114
MCTS1	-0.598	0.00865398	1	Malignant T-cell-amplified sequence 1
MAP2K2	-0.6	0.00151521	1	Dual specificity mitogen-activated protein kinase kinase 2
SULT1A1	-0.602	0.00595349	1	Sulfotransferase 1A1;Sulfotransferase 1A2
RAD50	-0.604	0.0427807	1	DNA repair protein RAD50
PSMC6	-0.606	0.00172825	1	26S protease regulatory subunit 10B
SMU1	-0.607	0.0248287	1	WD40 repeat-containing protein SMU1;WD40 repeat-containing protein SMU1, N-terminally processed
UQCRB	-0.607	0.012498	1	Cytochrome b-c1 complex subunit 7
XRCC5	-0.607	0.00256332	1	X-ray repair cross-complementing protein 5
DDX3X	-0.613	0.0180546	1	ATP-dependent RNA helicase DDX3X
ALCAM	-0.617	0.0455996	1	CD166 antigen
SCFD1	-0.623	0.000618756	1	Sec1 family domain-containing protein 1
EPHX2	-0.628	0.00488007	1	Bifunctional epoxide hydrolase 2;Cytosolic epoxide hydrolase 2;Lipid-phosphate phosphatase
MOGS	-0.63	0.0257881	1	Mannosyl-oligosaccharide glucosidase
CLTC	-0.631	0.018724	1	Clathrin heavy chain 1
SPTBN2	-0.632	0.0171447	1	Spectrin beta chain, non-erythrocytic 2
NDUFS1	-0.633	0.0125443	1	NADH-ubiquinone oxidoreductase 75 kDa subunit, mitochondrial
HSPA4	-0.636	0.000186903	1	Heat shock 70 kDa protein 4
CLIC6	-0.637	0.00504157	1	Chloride intracellular channel protein 6
HNRNPK	-0.64	0.000452585	1	Heterogeneous nuclear ribonucleoprotein K
ESYT2	-0.641	0.0176654	1	Extended synaptotagmin-2
CYB5R1	-0.642	0.0242977	1	NADH-cytochrome b5 reductase 1
AASS	-0.645	0.0207847	1	Alpha-aminoadipic semialdehyde synthase, mitochondrial;Lysine ketoglutarate reductase;Saccharopine dehydrogenase
HNRNPH1	-0.647	0.00054712	1	Heterogeneous nuclear ribonucleoprotein H;Heterogeneous nuclear ribonucleoprotein H, N-terminally processed
GSPT1	-0.648	0.00456014	1	Eukaryotic peptide chain release factor GTP-binding subunit ERF3A
HSPA1B	-0.65	0.00584718	1	Heat shock 70 kDa protein 1B;Heat shock 70 kDa protein 1A
IDH1	-0.65	0.0192543	1	Isocitrate dehydrogenase [NADP] cytoplasmic
SF3B1	-0.652	0.00355337	1	Splicing factor 3B subunit 1
TRAP1	-0.652	0.000656425	1	Heat shock protein 75 kDa, mitochondrial
ARPC1A	-0.654	0.00308548	1	Actin-related protein 2/3 complex subunit 1A
IFI16	-0.655	0.000261728	1	Gamma-interferon-inducible protein 16
IFT74	-0.656	0.0101643	1	Intraflagellar transport protein 74 homolog
STX18	-0.656	8.89851e-05	1	Syntaxin-18
SPATA6	-0.657	0.00822314	1	Spermatogenesis-associated protein 6
AKAP8	-0.663	0.00866573	1	A-kinase anchor protein 8
EPPK1	-0.663	0.0191902	1	Epiplakin
DBI	-0.664	0.0185212	1	Acyl-CoA-binding protein
AQP5	-0.666	0.00449395	1	Aquaporin-5
PRPF31	-0.668	0.0384267	1	U4/U6 small nuclear ribonucleoprotein Prp31
PRDX5	-0.669	0.00242792	1	Peroxiredoxin-5, mitochondrial
TRAF3IP1	-0.669	0.00163783	1	TRAF3-interacting protein 1
CAPN2	-0.67	0.0320839	1	Calpain-2 catalytic subunit
RPL27	-0.674	0.0160341	1	60S ribosomal protein L27
HNRNPH2	-0.676	0.0136942	1	Heterogeneous nuclear ribonucleoprotein H2
CORO7	-0.678	0.000809638	1	Coronin-7
PTGFRN	-0.678	0.0249466	1	Prostaglandin F2 receptor negative regulator
EML2	-0.68	5.1791e-05	1	Echinoderm microtubule-associated protein-like 2
CYP2S1	-0.681	0.000879202	1	Cytochrome P450 2S1
RUVBL2	-0.681	0.00453006	1	RuvB-like 2
NUDC	-0.685	0.00531703	1	Nuclear migration protein nudC
AKR1C3	-0.687	0.00299939	1	Aldo-keto reductase family 1 member C3
ILVBL	-0.69	0.0121453	1	Acetolactate synthase-like protein
HNRNPD	-0.691	0.0112136	1	Heterogeneous nuclear ribonucleoprotein D0
CNP	-0.694	0.0291656	1	2,3-cyclic-nucleotide 3-phosphodiesterase
CACYBP	-0.696	0.00604683	1	Calcyclin-binding protein
NMT1	-0.696	0.00449735	1	Glycylpeptide N-tetradecanoyltransferase 1
AP2B1	-0.698	0.00302525	1	AP-2 complex subunit beta
IFT88	-0.699	0.034252	1	Intraflagellar transport protein 88 homolog
SFPQ	-0.701	0.00514547	1	Splicing factor, proline- and glutamine-rich
LRPPRC	-0.705	0.00103844	1	Leucine-rich PPR motif-containing protein, mitochondrial
FUS	-0.706	0.00960812	1	RNA-binding protein FUS
GSTO1	-0.714	0.00615475	1	Glutathione S-transferase omega-1
NUP50	-0.714	0.0314427	1	Nuclear pore complex protein Nup50
WARS	-0.714	0.0150041	1	Tryptophan--tRNA ligase, cytoplasmic;T1-TrpRS;T2-TrpRS
RUVBL1	-0.715	0.00170763	1	RuvB-like 1
RPL15	-0.717	0.0246877	1	60S ribosomal protein L15
CPT2	-0.718	0.049164	1	Carnitine O-palmitoyltransferase 2, mitochondrial
AKR1C2	-0.72	0.027909	1	Aldo-keto reductase family 1 member C2
UFC1	-0.722	0.00436164	1	Ubiquitin-fold modifier-conjugating enzyme 1
COASY	-0.724	0.00165507	1	Bifunctional coenzyme A synthase;Phosphopantetheine adenylyltransferase;Dephospho-CoA kinase
SSR4	-0.727	0.0345687	1	Translocon-associated protein subunit delta
DNM1L	-0.739	0.0307548	1	Dynamin-1-like protein
EEF1G	-0.739	0.00715152	1	Elongation factor 1-gamma
SF3B3	-0.739	0.00258839	1	Splicing factor 3B subunit 3
CHORDC1	-0.743	0.00238797	1	Cysteine and histidine-rich domain-containing protein 1
CCT6A	-0.749	0.00461053	1	T-complex protein 1 subunit zeta
MLF1	-0.75	0.00103295	1	Myeloid leukemia factor 1
AGL	-0.751	0.0190454	1	Glycogen debranching enzyme;4-alpha-glucanotransferase;Amylo-alpha-1,6-glucosidase
BLVRA	-0.752	0.00107198	1	Biliverdin reductase A
TTLL12	-0.757	0.0438378	1	Tubulin--tyrosine ligase-like protein 12
VDAC2	-0.767	0.0360024	1	Voltage-dependent anion-selective channel protein 2
GCLM	-0.768	0.0133234	1	Glutamate--cysteine ligase regulatory subunit
FDXR	-0.773	0.000487887	1	NADPH:adrenodoxin oxidoreductase, mitochondrial
PRPF8	-0.775	0.000121414	1	Pre-mRNA-processing-splicing factor 8
RHOA	-0.775	0.0496833	1	Transforming protein RhoA
FH	-0.778	0.00146548	1	Fumarate hydratase, mitochondrial
MAPRE3	-0.78	0.000459319	1	Microtubule-associated protein RP/EB family member 3
PA2G4	-0.781	0.0345602	1	Proliferation-associated protein 2G4
ACTR1B	-0.782	0.0211602	1	Beta-centractin
LLGL2	-0.783	0.00559219	1	Lethal(2) giant larvae protein homolog 2
PRPS2	-0.787	0.000956872	1	Ribose-phosphate pyrophosphokinase 2
NSUN2	-0.788	0.011802	1	tRNA (cytosine(34)-C(5))-methyltransferase
ILF2	-0.79	0.00232462	1	Interleukin enhancer-binding factor 2
AK3	-0.791	0.000250081	1	GTP:AMP phosphotransferase AK3, mitochondrial
COX5A	-0.795	0.0073204	1	Cytochrome c oxidase subunit 5A, mitochondrial
SMC3	-0.796	0.0033714	1	Structural maintenance of chromosomes protein 3
MYO1D	-0.797	3.81444e-05	1	Unconventional myosin-Id
REEP5	-0.8	0.0262106	1	Receptor expression-enhancing protein 5
HSP90AA1	-0.809	0.000227342	1	Heat shock protein HSP 90-alpha
VAPA	-0.809	0.00921959	1	Vesicle-associated membrane protein-associated protein A
C19orf43	-0.815	0.000642616	1	Uncharacterized protein C19orf43
RPS19	-0.817	0.0284379	1	40S ribosomal protein S19
PREP	-0.819	0.0303963	1	Prolyl endopeptidase
HSP90AB2P	-0.82	0.00878673	1	Putative heat shock protein HSP 90-beta 2
COPS4	-0.823	3.25748e-06	1	COP9 signalosome complex subunit 4
PRKDC	-0.823	0.00601625	1	DNA-dependent protein kinase catalytic subunit
CYCS	-0.831	0.00968697	1	Cytochrome c
MATR3	-0.838	2.26771e-05	1	Matrin-3
CAPS	-0.84	0.00814406	1	Calcyphosin
AKR1B1	-0.842	1.60395e-05	1	Aldose reductase
RBBP6	-0.844	0.0109331	1	E3 ubiquitin-protein ligase RBBP6
HSPH1	-0.846	0.000185317	1	Heat shock protein 105 kDa
MRPL50	-0.847	0.00867615	1	39S ribosomal protein L50, mitochondrial
RBM25	-0.854	0.011883	1	RNA-binding protein 25
PSMD12	-0.858	0.00185267	1	26S proteasome non-ATPase regulatory subunit 12
ACTN4	-0.862	0.0331852	1	Alpha-actinin-4
CAND1	-0.869	0.0009063	1	Cullin-associated NEDD8-dissociated protein 1
RDX	-0.87	0.0137149	1	Radixin
C11orf54	-0.874	0.000376813	1	Ester hydrolase C11orf54
TOMM70A	-0.874	0.0167906	1	Mitochondrial import receptor subunit TOM70
PRDX1	-0.875	0.000210778	1	Peroxiredoxin-1
SNRNP70	-0.878	0.000383737	1	U1 small nuclear ribonucleoprotein 70 kDa
CAPNS1	-0.885	0.0316915	1	Calpain small subunit 1
GNA11	-0.885	0.0110775	1	Guanine nucleotide-binding protein subunit alpha-11
PSMD10	-0.889	0.00656223	1	26S proteasome non-ATPase regulatory subunit 10
ANP32B	-0.89	0.0171375	1	Acidic leucine-rich nuclear phosphoprotein 32 family member B
STUB1	-0.896	0.0379956	1	E3 ubiquitin-protein ligase CHIP
TTC25	-0.901	0.0064638	1	Tetratricopeptide repeat protein 25
TAF15	-0.904	0.00296296	1	TATA-binding protein-associated factor 2N
ATP5O	-0.911	0.00418314	1	ATP synthase subunit O, mitochondrial
C1orf87	-0.915	0.0093869	1	Uncharacterized protein C1orf87
GMPR2	-0.916	0.000417308	1	GMP reductase 2
NDUFA9	-0.917	0.0081461	1	NADH dehydrogenase [ubiquinone] 1 alpha subcomplex subunit 9, mitochondrial
SCOC	-0.919	0.0469712	1	Short coiled-coil protein
FLAD1	-0.921	0.0113973	1	FAD synthase;Molybdenum cofactor biosynthesis protein-like region;FAD synthase region
SLC25A4	-0.921	0.00330821	1	ADP/ATP translocase 1
PCM1	-0.925	0.00118871	1	Pericentriolar material 1 protein
PPID	-0.927	0.000411385	1	Peptidyl-prolyl cis-trans isomerase D
HADHB	-0.931	0.00673389	1	Trifunctional enzyme subunit beta, mitochondrial;3-ketoacyl-CoA thiolase
ABCE1	-0.935	0.000270173	1	ATP-binding cassette sub-family E member 1
GSK3B	-0.937	0.00121888	1	Glycogen synthase kinase-3 beta
ABCD3	-0.938	0.000222108	1	ATP-binding cassette sub-family D member 3
PTMA	-0.947	0.00777364	1	Prothymosin alpha;Prothymosin alpha, N-terminally processed;Thymosin alpha-1
GDI1	-0.951	0.00223213	1	Rab GDP dissociation inhibitor alpha
LRBA	-0.952	0.00395586	1	Lipopolysaccharide-responsive and beige-like anchor protein
POR	-0.956	0.00168402	1	NADPH--cytochrome P450 reductase
ATP1B1	-0.964	0.0311577	1	Sodium/potassium-transporting ATPase subunit beta-1
RPS15	-0.966	0.000216778	1	40S ribosomal protein S15
RPS3	-0.966	0.0223306	1	40S ribosomal protein S3
CYP4B1	-0.969	3.34827e-05	1	Cytochrome P450 4B1
C9orf9	-0.975	0.00151899	1	Uncharacterized protein C9orf9
OLA1	-0.975	0.00446919	1	Obg-like ATPase 1
CYFIP1	-0.979	0.0125458	1	Cytoplasmic FMR1-interacting protein 1
ACLY	-0.983	0.00176204	1	ATP-citrate synthase
PARK7	-0.985	0.000453681	1	Protein deglycase DJ-1
CD59	-0.987	0.00259558	1	CD59 glycoprotein
TFAM	-0.987	0.00319218	1	Transcription factor A, mitochondrial
ACADVL	-0.991	0.02682	1	Very long-chain specific acyl-CoA dehydrogenase, mitochondrial
COX6B1	-0.992	0.000965608	1	Cytochrome c oxidase subunit 6B1
CTBP1	-0.992	9.49897e-05	1	C-terminal-binding protein 1
LHPP	-0.997	0.0206449	1	Phospholysine phosphohistidine inorganic pyrophosphate phosphatase
LGALS3	-1	0.00666373	1	Galectin-3
AP1G1	-1.01	0.000228221	1	AP-1 complex subunit gamma-1
DYNC1H1	-1.01	0.000364777	1	Cytoplasmic dynein 1 heavy chain 1
MAOA	-1.01	0.00767753	1	Amine oxidase [flavin-containing] A
SEC23B	-1.01	0.00334037	1	Protein transport protein Sec23B
DNAJB1	-1.02	0.00252093	1	DnaJ homolog subfamily B member 1
FIS1	-1.02	0.000199102	1	Mitochondrial fission 1 protein
LARS	-1.02	0.00313859	1	Leucine--tRNA ligase, cytoplasmic
NIT2	-1.02	0.00745544	1	Omega-amidase NIT2
RABL2B	-1.02	6.14152e-06	1	Rab-like protein 2B;Rab-like protein 2A
S100A16	-1.02	0.00101271	1	Protein S100-A16
UGT1A6	-1.03	0.00686494	1	UDP-glucuronosyltransferase 1-6;UDP-glucuronosyltransferase 1-8;UDP-glucuronosyltransferase 1-10;UDP-glucuronosyltransferase 1-9;UDP-glucuronosyltransferase 1-1;UDP-glucuronosyltransferase 1-5;UDP-glucuronosyltransferase 1-3;UDP-glucuronosyltransferase 1-4
BAG1	-1.04	0.00235273	1	BAG family molecular chaperone regulator 1
HAGH	-1.04	0.00100062	1	Hydroxyacylglutathione hydrolase, mitochondrial
RPL22	-1.04	0.000746416	1	60S ribosomal protein L22
SAR1A	-1.04	0.0257853	1	GTP-binding protein SAR1a
MARS	-1.05	0.000672455	1	Methionine--tRNA ligase, cytoplasmic
PEBP1	-1.05	0.000107735	1	Phosphatidylethanolamine-binding protein 1;Hippocampal cholinergic neurostimulating peptide
RPS4X	-1.05	0.00761196	1	40S ribosomal protein S4, X isoform
SELENBP1	-1.05	0.00430964	1	Selenium-binding protein 1
BANF1	-1.06	0.00625923	1	Barrier-to-autointegration factor;Barrier-to-autointegration factor, N-terminally processed
CES2	-1.06	0.00145813	1	Cocaine esterase
ODF2	-1.06	0.00488859	1	Outer dense fiber protein 2
RPL3	-1.06	0.0014086	1	60S ribosomal protein L3
SNRPA1	-1.06	0.000934492	1	U2 small nuclear ribonucleoprotein A
STAT3	-1.06	3.79272e-05	1	Signal transducer and activator of transcription 3
DNAJA4	-1.07	0.00331306	1	DnaJ homolog subfamily A member 4
MTX2	-1.07	0.00584834	1	Metaxin-2
NAGK	-1.07	0.00467945	1	N-acetyl-D-glucosamine kinase
RAP1B	-1.07	0.00270767	1	Ras-related protein Rap-1b;Ras-related protein Rap-1b-like protein
ARL3	-1.08	0.000147709	1	ADP-ribosylation factor-like protein 3
CYC1	-1.08	0.000377994	1	Cytochrome c1, heme protein, mitochondrial
XPO1	-1.08	7.93577e-05	1	Exportin-1
EFTUD2	-1.09	0.0100354	1	116 kDa U5 small nuclear ribonucleoprotein component
UFL1	-1.09	2.46019e-05	1	E3 UFM1-protein ligase 1
CMPK1	-1.1	5.18647e-05	1	UMP-CMP kinase
HIST1H3A	-1.1	0.00388227	1	Histone H3.1;Histone H3.1t
PYCARD	-1.1	0.000139017	1	Apoptosis-associated speck-like protein containing a CARD
BASP1	-1.11	0.0103016	1	Brain acid soluble protein 1
KPNA6	-1.11	0.0143369	1	Importin subunit alpha-7;Importin subunit alpha-6
SUGT1	-1.11	0.00034876	1	Suppressor of G2 allele of SKP1 homolog
TSPO	-1.12	0.000601006	1	Translocator protein
ARPC2	-1.13	0.00173017	1	Actin-related protein 2/3 complex subunit 2
KYNU	-1.13	0.000259841	1	Kynureninase
COPG2	-1.15	0.00183457	1	Coatomer subunit gamma-2
DDX1	-1.15	0.000603271	1	ATP-dependent RNA helicase DDX1
GCN1L1	-1.15	0.00537594	1	Translational activator GCN1
H2AFX	-1.15	0.000702368	1	Histone H2AX;Histone H2A type 1-A
IFT172	-1.15	0.000781974	1	Intraflagellar transport protein 172 homolog
HIGD2A	-1.17	0.0331426	1	HIG1 domain family member 2A, mitochondrial
LCN2	-1.17	0.0134687	1	Neutrophil gelatinase-associated lipocalin
AP2A1	-1.18	0.00235778	1	AP-2 complex subunit alpha-1
CRIP1	-1.18	0.0101146	1	Cysteine-rich protein 1
UBE2L3	-1.18	0.000306762	1	Ubiquitin-conjugating enzyme E2 L3
AARS	-1.19	0.00834175	1	Alanine--tRNA ligase, cytoplasmic
CFAP52	-1.19	0.000274487	1	Cilia- and flagella-associated protein 52
HMGB1	-1.19	0.000117624	1	High mobility group protein B1;Putative high mobility group protein B1-like 1
PLEKHA5	-1.19	0.000151377	1	Pleckstrin homology domain-containing family A member 5
AK7	-1.2	1.06498e-05	1	Adenylate kinase 7
RSPH9	-1.2	0.000161168	1	Radial spoke head protein 9 homolog
BZW1	-1.21	0.012032	1	Basic leucine zipper and W2 domain-containing protein 1
HMGB2	-1.21	0.000763355	1	High mobility group protein B2
RPL18	-1.22	0.000286232	1	60S ribosomal protein L18
TNC	-1.22	0.00198513	1	Tenascin
ATP5F1	-1.23	0.0106434	1	ATP synthase F(0) complex subunit B1, mitochondrial
KIF21A	-1.23	0.000413788	1	Kinesin-like protein KIF21A
MT-CO2	-1.23	0.0227083	1	Cytochrome c oxidase subunit 2
PRKRA	-1.25	0.00291077	1	Interferon-inducible double-stranded RNA-dependent protein kinase activator A
QARS	-1.26	0.00019606	1	Glutamine--tRNA ligase
ACTN1	-1.27	0.00353068	1	Alpha-actinin-1
CCDC151	-1.27	0.00175868	1	Coiled-coil domain-containing protein 151
AKR1B10	-1.28	0.000302727	1	Aldo-keto reductase family 1 member B10
APPL2	-1.28	0.000669592	1	DCC-interacting protein 13-beta
CNDP2	-1.29	0.00453493	1	Cytosolic non-specific dipeptidase
DDX5	-1.29	0.000436591	1	Probable ATP-dependent RNA helicase DDX5
PTGR1	-1.29	0.0192446	1	Prostaglandin reductase 1
S100A14	-1.29	0.0025926	1	Protein S100-A14
UBA6	-1.29	0.0001111	1	Ubiquitin-like modifier-activating enzyme 6
LYPLA1	-1.3	0.005982	1	Acyl-protein thioesterase 1
RPL30	-1.3	0.00659142	1	60S ribosomal protein L30
PHB2	-1.31	5.36637e-06	1	Prohibitin-2
CROCC	-1.32	0.0131921	1	Rootletin
ANXA8L2	-1.33	0.000315171	1	Annexin A8-like protein 2
GBP6	-1.33	0.00117429	1	Guanylate-binding protein 6
EIF4A3	-1.34	0.000205555	1	Eukaryotic initiation factor 4A-III;Eukaryotic initiation factor 4A-III, N-terminally processed
GFM2	-1.35	1.59256e-05	1	Ribosome-releasing factor 2, mitochondrial
ADH1C	-1.36	0.0125677	1	Alcohol dehydrogenase 1C
RPL38	-1.37	0.00507409	1	60S ribosomal protein L38
ECH1	-1.38	0.00405876	1	Delta(3,5)-Delta(2,4)-dienoyl-CoA isomerase, mitochondrial
ALDH3A2	-1.39	0.000270734	1	Fatty aldehyde dehydrogenase
DHX9	-1.41	5.67414e-05	1	ATP-dependent RNA helicase A
C14orf166	-1.42	0.000112489	1	UPF0568 protein C14orf166
S100A11	-1.43	0.00107214	1	Protein S100-A11;Protein S100-A11, N-terminally processed
UGDH	-1.44	3.31498e-05	1	UDP-glucose 6-dehydrogenase
ARHGAP18	-1.48	0.000222889	1	Rho GTPase-activating protein 18
ARMC4	-1.48	3.49276e-06	1	Armadillo repeat-containing protein 4
S100P	-1.48	0.00895611	1	Protein S100-P
SPRR1A	-1.48	1.11177e-10	1	Cornifin-A
RPN2	-1.5	0.00210696	1	Dolichyl-diphosphooligosaccharide--protein glycosyltransferase subunit 2
G6PD	-1.52	0.000522904	1	Glucose-6-phosphate 1-dehydrogenase
RPS13	-1.54	0.00361875	1	40S ribosomal protein S13
AHSA1	-1.56	3.80632e-05	1	Activator of 90 kDa heat shock protein ATPase homolog 1
CETN2	-1.57	5.33397e-05	1	Centrin-2
SLC44A4	-1.6	0.000249418	1	Choline transporter-like protein 4
SPRR3	-1.62	0.0133094	1	Small proline-rich protein 3
IPO4	-1.65	4.88824e-05	1	Importin-4
EWSR1	-1.66	0.000142035	1	RNA-binding protein EWS
DYNLL1	-1.67	2.40856e-06	1	Dynein light chain 1, cytoplasmic
PPP1CA	-1.67	0.000716872	1	Serine/threonine-protein phosphatase PP1-alpha catalytic subunit
CCDC170	-1.68	0.00516987	1	Coiled-coil domain-containing protein 170
MAP1A	-1.68	3.63146e-05	1	Microtubule-associated protein 1A;MAP1A heavy chain;MAP1 light chain LC2
PAPSS1	-1.69	1.24778e-05	1	Bifunctional 3-phosphoadenosine 5-phosphosulfate synthase 1;Sulfate adenylyltransferase;Adenylyl-sulfate kinase
METTL7A	-1.7	1.17036e-06	1	Methyltransferase-like protein 7A
ST13	-1.71	0.000521507	1	Hsc70-interacting protein;Putative protein FAM10A4;Putative protein FAM10A5
CSNK2A1	-1.73	7.46987e-05	1	Casein kinase II subunit alpha;Casein kinase II subunit alpha 3
ARF1	-1.75	0.000280578	1	ADP-ribosylation factor 1;ADP-ribosylation factor 3
SET	-1.76	0.000836006	1	Protein SET
TKT	-1.76	0.00811053	1	Transketolase
RSPH1	-1.78	8.44781e-07	1	Radial spoke head 1 homolog
RSPH4A	-1.78	8.83257e-06	1	Radial spoke head protein 4 homolog A
DNAH9	-1.79	0.000156134	1	Dynein heavy chain 9, axonemal
PSMD1	-1.84	0.000228459	1	26S proteasome non-ATPase regulatory subunit 1
UPF1	-1.84	3.74364e-06	1	Regulator of nonsense transcripts 1
MTCH2	-1.85	1.11118e-05	1	Mitochondrial carrier homolog 2
ABHD11	-1.86	1.39574e-05	1	Alpha/beta hydrolase domain-containing protein 11
MB	-1.91	0.000690424	1	Myoglobin
TXNRD1	-1.94	0.000172831	1	Thioredoxin reductase 1, cytoplasmic
DDB1	-1.98	2.67786e-06	1	DNA damage-binding protein 1
ATPIF1	-2	2.04292e-06	1	ATPase inhibitor, mitochondrial
SPAG6	-2	3.93287e-06	1	Sperm-associated antigen 6
S100A2	-2.01	0.023898	1	Protein S100-A2
S100A9	-2.02	0.00458478	1	Protein S100-A9
S100A10	-2.05	0.0419542	1	Protein S100-A10
SNRNP200	-2.1	1.80793e-05	1	U5 small nuclear ribonucleoprotein 200 kDa helicase
SOD1	-2.1	8.93076e-06	1	Superoxide dismutase [Cu-Zn]
GSR	-2.14	0.0115525	1	Glutathione reductase, mitochondrial
SYNE1	-2.21	5.24347e-06	1	Nesprin-1
NUCB2	-2.23	1.8331e-05	1	Nucleobindin-2;Nesfatin-1
ALDH3B1	-2.29	8.4552e-06	1	Aldehyde dehydrogenase family 3 member B1
PSME2	-2.29	0.000235516	1	Proteasome activator complex subunit 2
RPLP2	-2.29	0.00803144	1	60S acidic ribosomal protein P2
S100A8	-2.29	0.00075655	1	Protein S100-A8;Protein S100-A8, N-terminally processed
GPI	-2.39	0.0075006	1	Glucose-6-phosphate isomerase
SAMHD1	-2.41	2.291e-06	1	Deoxynucleoside triphosphate triphosphohydrolase SAMHD1
CD9	-2.46	7.5306e-06	1	CD9 antigen
GNB2L1	-2.49	0.00175182	1	Guanine nucleotide-binding protein subunit beta-2-like 1;Guanine nucleotide-binding protein subunit beta-2-like 1, N-terminally processed
NQO1	-2.5	0.000420909	1	NAD(P)H dehydrogenase [quinone] 1
PPOX	-2.56	6.83026e-08	1	Protoporphyrinogen oxidase
SERPINB6	-2.57	0.00198289	1	Serpin B6
ADH7	-2.58	5.86438e-06	1	Alcohol dehydrogenase class 4 mu/sigma chain
AGR3	-2.62	7.80085e-06	1	Anterior gradient protein 3 homolog
HADH	-2.62	0.000490615	1	Hydroxyacyl-coenzyme A dehydrogenase, mitochondrial
SLC27A2	-2.65	9.05376e-09	1	Very long-chain acyl-CoA synthetase
S100A6	-2.69	0.000454272	1	Protein S100-A6
CES1	-2.85	0.00119905	1	Liver carboxylesterase 1
DYNC2H1	-2.91	5.73903e-08	1	Cytoplasmic dynein 2 heavy chain 1
GSTA1	-2.97	9.65226e-10	1	Glutathione S-transferase A1;Glutathione S-transferase A1, N-terminally processed
ALDH3A1	-3.17	2.18851e-06	1	Aldehyde dehydrogenase, dimeric NADP-preferring
EPHX1	-3.25	9.27653e-05	1	Epoxide hydrolase 1
ERICH3	-3.28	0.000350562	1	Glutamate-rich protein 3
DNAH5	-4.17	6.43075e-09	1	Dynein heavy chain 5, axonemal
ALDH1A1	-4.19	1.79928e-05	1	Retinal dehydrogenase 1

## Sheet: CF_HH.vs.CF_NN_PAIR 5
CF_HH.vs.CF_NN [PAIR 5]
Protein	logFC	Pvalue	P.adj	protein_name
NDRG1	6.78	5.26539e-22	5.4e-13	Protein NDRG1
MUC5B	4.5	4.17141e-08	0.0353	Mucin-5B
PACSIN2	2.41	3.4959e-07	0.126	Protein kinase C and casein kinase substrate in neurons protein 2
DPYD	2.27	1.88836e-08	0.0238	Dihydropyrimidine dehydrogenase [NADP(+)]
MT1X	2.2	0.00481416	0.96	Metallothionein-1X
LOXL4	2.15	2.0034e-10	0.000594	Lysyl oxidase homolog 4
ACTB	2.15	0.00220975	0.945	Actin, cytoplasmic 1;Actin, cytoplasmic 1, N-terminally processed
P4HA1	2.14	2.39103e-12	5.57e-06	Prolyl 4-hydroxylase subunit alpha-1
PRPF38B	2.11	0.0016831	0.938	Pre-mRNA-splicing factor 38B
VIM	1.89	0.0106728	0.971	Vimentin
LGALS1	1.86	0.000753057	0.913	Galectin-1
FSCN1	1.85	1.53845e-08	0.0211	Fascin
MT2A	1.67	3.3605e-05	0.693	Metallothionein-2
CP	1.66	0.0304221	0.981	Ceruloplasmin
CYLD	1.54	0.000587065	0.904	Ubiquitin carboxyl-terminal hydrolase CYLD
TGM2	1.46	0.0291852	0.981	Protein-glutamine gamma-glutamyltransferase 2
H1F0	1.45	4.07143e-05	0.714	Histone H1.0;Histone H1.0, N-terminally processed
SCGB1A1	1.43	0.0188688	0.977	Uteroglobin
SPATS2L	1.43	0.000278103	0.868	SPATS2-like protein
SPINT1	1.37	3.43784e-05	0.695	Kunitz-type protease inhibitor 1
AFF4	1.35	6.25419e-05	0.758	AF4/FMR2 family member 4
CPD	1.34	5.39576e-05	0.743	Carboxypeptidase D
ITGAV	1.3	0.00350164	0.954	Integrin alpha-V;Integrin alpha-V heavy chain;Integrin alpha-V light chain
HMGN3	1.29	0.0027874	0.95	High mobility group nucleosome-binding domain-containing protein 3
ERO1L	1.26	0.00014198	0.826	ERO1-like protein alpha
MUC5AC	1.26	0.0407689	0.983	Mucin-5AC
ZBTB33	1.23	0.000250294	0.862	Transcriptional regulator Kaiso
DSG2	1.18	0.000483994	0.896	Desmoglein-2
RRBP1	1.18	1.34846e-05	0.577	Ribosome-binding protein 1
STAU1	1.17	0.000597246	0.904	Double-stranded RNA-binding protein Staufen homolog 1
SLC16A3	1.16	3.71597e-07	0.129	Monocarboxylate transporter 4
HSPG2	1.15	0.00151596	0.935	Basement membrane-specific heparan sulfate proteoglycan core protein;Endorepellin;LG3 peptide
CAV1	1.13	3.01638e-08	0.0304	Caveolin-1
SLC39A10	1.1	0.00182341	0.94	Zinc transporter ZIP10
CEP104	1.09	0.00251047	0.948	Centrosomal protein of 104 kDa
F3	1.05	0.000257803	0.864	Tissue factor
VAMP8	1.05	0.000816774	0.916	Vesicle-associated membrane protein 8
GLIPR2	1.04	0.00688384	0.965	Golgi-associated plant pathogenesis-related protein 1
NUCB1	1.04	0.00252102	0.948	Nucleobindin-1
CBX1	1.03	0.0161276	0.975	Chromobox protein homolog 1
ASS1	1.02	3.697e-05	0.703	Argininosuccinate synthase
TRIP6	1.02	0.010438	0.971	Thyroid receptor-interacting protein 6
WDR33	1.02	0.000112961	0.809	pre-mRNA 3 end processing protein WDR33
ARID5B	1.01	0.0136764	0.974	AT-rich interactive domain-containing protein 5B
ROCK2	1.01	5.91512e-06	0.46	Rho-associated protein kinase 2
ITGB4	1	5.69525e-05	0.749	Integrin beta-4
CPOX	0.998	1.18723e-05	0.56	Oxygen-dependent coproporphyrinogen-III oxidase, mitochondrial
ALDOA	0.997	2.92372e-10	0.000729	Fructose-bisphosphate aldolase A
NDUFA7	0.997	0.000386733	0.885	NADH dehydrogenase [ubiquinone] 1 alpha subcomplex subunit 7
PDXDC1	0.997	0.00825906	0.968	Pyridoxal-dependent decarboxylase domain-containing protein 1
EIF4EBP2	0.995	0.00153565	0.936	Eukaryotic translation initiation factor 4E-binding protein 2
FHL2	0.988	0.00376785	0.956	Four and a half LIM domains protein 2
PRKCA	0.973	0.00127912	0.931	Protein kinase C alpha type
BPIFA1	0.972	0.0046734	0.959	BPI fold-containing family A member 1
NUCKS1	0.967	0.00580433	0.963	Nuclear ubiquitous casein and cyclin-dependent kinase substrate 1
SOD2	0.967	0.0270677	0.98	Superoxide dismutase [Mn], mitochondrial
PHF3	0.96	4.02362e-05	0.713	PHD finger protein 3
APOL2	0.957	0.00132596	0.932	Apolipoprotein L2
CEP170	0.952	0.000535223	0.9	Centrosomal protein of 170 kDa
NDUFB6	0.945	0.0013254	0.932	NADH dehydrogenase [ubiquinone] 1 beta subcomplex subunit 6
MSLN	0.939	0.00863973	0.968	Mesothelin;Megakaryocyte-potentiating factor;Mesothelin, cleaved form
LSM5	0.933	0.0191948	0.977	U6 snRNA-associated Sm-like protein LSm5
UAP1	0.924	0.000355688	0.881	UDP-N-acetylhexosamine pyrophosphorylase;UDP-N-acetylgalactosamine pyrophosphorylase;UDP-N-acetylglucosamine pyrophosphorylase
MIF	0.917	0.000318421	0.875	Macrophage migration inhibitory factor
TFF3	0.916	0.0216972	0.978	Trefoil factor 3
LRRFIP1	0.915	0.010274	0.971	Leucine-rich repeat flightless-interacting protein 1
PRKX	0.907	0.000546004	0.901	cAMP-dependent protein kinase catalytic subunit PRKX
WFDC2	0.904	0.0155635	0.975	WAP four-disulfide core domain protein 2
NOLC1	0.894	0.0172615	0.976	Nucleolar and coiled-body phosphoprotein 1
LPP	0.892	0.00267318	0.949	Lipoma-preferred partner
TACSTD2	0.889	0.000171714	0.839	Tumor-associated calcium signal transducer 2
LAMTOR5	0.882	2.23586e-05	0.644	Ragulator complex protein LAMTOR5
GYS1	0.878	3.38029e-06	0.379	Glycogen [starch] synthase, muscle
LSP1	0.877	0.0153736	0.975	Lymphocyte-specific protein 1
ATAD3B	0.876	0.000802936	0.916	ATPase family AAA domain-containing protein 3B
ACSF2	0.875	6.2055e-07	0.172	Acyl-CoA synthetase family member 2, mitochondrial
NEDD8	0.872	0.00984723	0.97	NEDD8
FLNA	0.859	0.000384737	0.885	Filamin-A
RRM1	0.858	0.0051662	0.961	Ribonucleoside-diphosphate reductase large subunit
CXCL1	0.854	1.68865e-05	0.608	Growth-regulated alpha protein;GRO-alpha(4-73);GRO-alpha(5-73);GRO-alpha(6-73)
TUBB2A	0.842	1.683e-06	0.284	Tubulin beta-2A chain
SRPRB	0.841	0.00122405	0.929	Signal recognition particle receptor subunit beta
IGFBP2	0.838	0.00985171	0.97	Insulin-like growth factor-binding protein 2
DDT	0.83	0.0251175	0.979	D-dopachrome decarboxylase;D-dopachrome decarboxylase-like protein
SRGAP3	0.83	0.000588856	0.904	SLIT-ROBO Rho GTPase-activating protein 3
ST14	0.824	0.00274578	0.949	Suppressor of tumorigenicity 14 protein
PSMA1	0.822	0.00169632	0.938	Proteasome subunit alpha type-1
IRF2BP2	0.818	0.000164208	0.836	Interferon regulatory factor 2-binding protein 2
PHF21A	0.816	0.000164429	0.836	PHD finger protein 21A
ZYX	0.812	0.00945833	0.97	Zyxin
HIST2H2AB	0.809	0.0169241	0.976	Histone H2A type 2-B
GMFB	0.804	0.00611858	0.964	Glia maturation factor beta
BPIFB1	0.798	0.0216463	0.978	BPI fold-containing family B member 1
CARHSP1	0.791	0.021101	0.978	Calcium-regulated heat stable protein 1
AP1S1	0.79	7.3966e-05	0.773	AP-1 complex subunit sigma-1A
PSMB10	0.789	0.00180098	0.94	Proteasome subunit beta type-10
RRAS2	0.788	4.7969e-05	0.731	Ras-related protein R-Ras2
BBS2	0.783	0.00177344	0.939	Bardet-Biedl syndrome 2 protein
TBCA	0.779	0.0265964	0.98	Tubulin-specific chaperone A
IRGQ	0.769	0.00136234	0.932	Immunity-related GTPase family Q protein
RRP12	0.765	0.0122203	0.973	RRP12-like protein
IQUB	0.757	0.00124769	0.93	IQ and ubiquitin-like domain-containing protein
LAGE3	0.757	0.00158186	0.936	EKC/KEOPS complex subunit LAGE3
WIBG	0.755	0.00371296	0.955	Partner of Y14 and mago
SERPINH1	0.754	0.00578223	0.963	Serpin H1
PLEKHS1	0.751	0.0089836	0.969	Pleckstrin homology domain-containing family S member 1
LYZ	0.749	0.00308054	0.952	Lysozyme C
ARPP19	0.747	0.00988384	0.97	cAMP-regulated phosphoprotein 19
DBNL	0.746	5.21338e-05	0.74	Drebrin-like protein
NDUFA2	0.746	0.0322229	0.981	NADH dehydrogenase [ubiquinone] 1 alpha subcomplex subunit 2
AGRN	0.745	0.00383345	0.956	Agrin;Agrin N-terminal 110 kDa subunit;Agrin C-terminal 110 kDa subunit;Agrin C-terminal 90 kDa fragment;Agrin C-terminal 22 kDa fragment
AHCYL2	0.745	3.89981e-05	0.709	Putative adenosylhomocysteinase 3
PAPSS2	0.742	1.89637e-05	0.623	Bifunctional 3-phosphoadenosine 5-phosphosulfate synthase 2;Sulfate adenylyltransferase;Adenylyl-sulfate kinase
ARHGEF5	0.741	0.000826486	0.917	Rho guanine nucleotide exchange factor 5
FLOT1	0.738	0.00017375	0.84	Flotillin-1
TOM1	0.738	0.0113805	0.972	Target of Myb protein 1
TEKT3	0.737	0.00166014	0.938	Tektin-3
BSG	0.734	0.00427062	0.958	Basigin
LDHA	0.725	0.00855332	0.968	L-lactate dehydrogenase A chain
HDLBP	0.72	4.88672e-05	0.733	Vigilin
GNL3	0.718	4.41853e-05	0.723	Guanine nucleotide-binding protein-like 3
STK24	0.715	0.000397974	0.887	Serine/threonine-protein kinase 24;Serine/threonine-protein kinase 24 36 kDa subunit;Serine/threonine-protein kinase 24 12 kDa subunit
TMEM173	0.715	0.0293946	0.981	Stimulator of interferon genes protein
ANKS1A	0.712	0.00410275	0.957	Ankyrin repeat and SAM domain-containing protein 1A
PTK2	0.711	0.000585758	0.904	Focal adhesion kinase 1
NMNAT1	0.709	6.48979e-05	0.761	Nicotinamide/nicotinic acid mononucleotide adenylyltransferase 1
SLFN5	0.707	0.00224402	0.945	Schlafen family member 5
SORD	0.705	0.000938337	0.921	Sorbitol dehydrogenase
TNRC6B	0.703	0.000206537	0.851	Trinucleotide repeat-containing gene 6B protein
TPM4	0.697	0.000156102	0.832	Tropomyosin alpha-4 chain
VCL	0.696	0.00140642	0.933	Vinculin
HP1BP3	0.685	0.0123149	0.973	Heterochromatin protein 1-binding protein 3
HMGCS1	0.684	0.018663	0.977	Hydroxymethylglutaryl-CoA synthase, cytoplasmic
EIF3J	0.68	0.0178194	0.976	Eukaryotic translation initiation factor 3 subunit J
QDPR	0.675	0.00578759	0.963	Dihydropteridine reductase
CDV3	0.671	0.00512663	0.961	Protein CDV3 homolog
SSNA1	0.671	0.000603362	0.905	Sjoegren syndrome nuclear autoantigen 1
CEP131	0.669	0.0021093	0.944	Centrosomal protein of 131 kDa
EML4	0.666	0.00708454	0.966	Echinoderm microtubule-associated protein-like 4
RIOK3	0.664	0.0225178	0.979	Serine/threonine-protein kinase RIO3
PPP1R8	0.663	0.00253385	0.948	Nuclear inhibitor of protein phosphatase 1;Activator of RNA decay
MRPS5	0.658	0.00700519	0.966	28S ribosomal protein S5, mitochondrial
NUP88	0.656	0.00918029	0.969	Nuclear pore complex protein Nup88
CELF1	0.655	0.0457142	0.984	CUGBP Elav-like family member 1
GALNT7	0.654	0.00203791	0.943	N-acetylgalactosaminyltransferase 7
PXN	0.653	0.0032328	0.953	Paxillin
SH3BGRL3	0.649	0.0113237	0.972	SH3 domain-binding glutamic acid-rich-like protein 3
LDLRAD1	0.641	0.000711655	0.911	Low-density lipoprotein receptor class A domain-containing protein 1
SRRM1	0.64	0.0156462	0.975	Serine/arginine repetitive matrix protein 1
MAGED2	0.634	0.00731669	0.966	Melanoma-associated antigen D2
CKAP4	0.632	0.00021722	0.854	Cytoskeleton-associated protein 4
HTRA2	0.631	0.00104183	0.924	Serine protease HTRA2, mitochondrial
SIRT5	0.625	0.0111771	0.972	NAD-dependent protein deacylase sirtuin-5, mitochondrial
HIGD1A	0.622	0.00636908	0.964	HIG1 domain family member 1A, mitochondrial
EXOC4	0.616	0.0183102	0.977	Exocyst complex component 4
HN1L	0.616	0.0223606	0.978	Hematological and neurological expressed 1-like protein
FAM49B	0.615	0.00354311	0.955	Protein FAM49B
EXOC5	0.614	8.06182e-05	0.781	Exocyst complex component 5
DCAF7	0.613	0.00116842	0.928	DDB1- and CUL4-associated factor 7
THEM6	0.611	0.000609867	0.905	Protein THEM6
KIAA1598	0.61	0.000545037	0.901	Shootin-1
HTATSF1	0.605	0.0159177	0.975	HIV Tat-specific factor 1
CHMP2A	0.604	0.00133188	0.932	Charged multivesicular body protein 2a
HSPA6	0.596	0.0134369	0.974	Heat shock 70 kDa protein 6
NMES1	0.591	0.00130655	0.931	Normal mucosa of esophagus-specific gene 1 protein
ADPGK	0.59	0.00312795	0.952	ADP-dependent glucokinase
KRAS	0.588	0.000324843	0.877	GTPase KRas;GTPase KRas, N-terminally processed
STAT2	0.587	0.00108034	0.925	Signal transducer and activator of transcription 2
ACO1	0.585	0.000712715	0.911	Cytoplasmic aconitate hydratase
MAP4	0.585	0.001142	0.927	Microtubule-associated protein 4
YWHAB	0.585	0.000897304	0.919	14-3-3 protein beta/alpha;14-3-3 protein beta/alpha, N-terminally processed
RFX3	0.584	0.000362888	0.882	Transcription factor RFX3
IFT57	0.581	0.00414302	0.957	Intraflagellar transport protein 57 homolog
TLN1	0.581	0.0218761	0.978	Talin-1
RPS26	0.575	0.0262239	0.98	40S ribosomal protein S26;Putative 40S ribosomal protein S26-like 1
MRPS34	0.572	0.00473203	0.96	28S ribosomal protein S34, mitochondrial
PRDX4	0.572	0.0382941	0.983	Peroxiredoxin-4
SEPT8	0.569	0.00610322	0.964	Septin-8
SEPT9	0.569	0.0127333	0.973	Septin-9
SIAE	0.569	0.00209553	0.943	Sialate O-acetylesterase
TRMT1L	0.568	0.0433877	0.983	TRMT1-like protein
COPZ1	0.562	0.0448783	0.984	Coatomer subunit zeta-1
DUT	0.561	0.00382653	0.956	Deoxyuridine 5-triphosphate nucleotidohydrolase, mitochondrial
FLNB	0.561	6.35717e-05	0.759	Filamin-B
PNPO	0.558	0.0145403	0.974	Pyridoxine-5-phosphate oxidase
ATP6V1D	0.554	0.00315486	0.952	V-type proton ATPase subunit D
ABI1	0.553	0.0303821	0.981	Abl interactor 1
BID	0.552	0.00998011	0.97	BH3-interacting domain death agonist;BH3-interacting domain death agonist p15;BH3-interacting domain death agonist p13;BH3-interacting domain death agonist p11
APPL1	0.551	0.000514038	0.898	DCC-interacting protein 13-alpha
DBT	0.551	0.00714622	0.966	Lipoamide acyltransferase component of branched-chain alpha-keto acid dehydrogenase complex, mitochondrial
RBM8A	0.55	0.0387506	0.983	RNA-binding protein 8A
CLINT1	0.548	0.0039665	0.957	Clathrin interactor 1
TMCO1	0.548	0.00188286	0.941	Transmembrane and coiled-coil domain-containing protein 1
PGK1	0.547	0.000219096	0.854	Phosphoglycerate kinase 1
LIMA1	0.545	0.0228899	0.979	LIM domain and actin-binding protein 1
PPA2	0.545	0.0495614	0.984	Inorganic pyrophosphatase 2, mitochondrial
LASP1	0.542	0.0411959	0.983	LIM and SH3 domain protein 1
STRBP	0.541	0.00634427	0.964	Spermatid perinuclear RNA-binding protein
TNKS1BP1	0.541	0.00626213	0.964	182 kDa tankyrase-1-binding protein
SHMT2	0.54	0.0236853	0.979	Serine hydroxymethyltransferase, mitochondrial
CST3	0.539	0.0417406	0.983	Cystatin-C
IPO9	0.539	0.0249106	0.979	Importin-9
NUFIP2	0.539	0.00468046	0.959	Nuclear fragile X mental retardation-interacting protein 2
RETSAT	0.537	0.0184643	0.977	All-trans-retinol 13,14-reductase
EFHC2	0.534	0.00617894	0.964	EF-hand domain-containing family member C2
GRPEL1	0.532	0.0121563	0.972	GrpE protein homolog 1, mitochondrial
SRSF9	0.532	8.61629e-05	0.787	Serine/arginine-rich splicing factor 9
TCEB3	0.532	0.00642415	0.964	Transcription elongation factor B polypeptide 3
ACOX1	0.531	0.00235057	0.946	Peroxisomal acyl-coenzyme A oxidase 1
HOOK1	0.53	0.00398294	0.957	Protein Hook homolog 1
SEC22B	0.528	0.0303145	0.981	Vesicle-trafficking protein SEC22b
SP3	0.528	0.00953134	0.97	Transcription factor Sp3
PHF6	0.526	0.00456205	0.959	PHD finger protein 6
PPP1R14B	0.522	0.000697448	0.91	Protein phosphatase 1 regulatory subunit 14B
HINT1	0.521	0.0268116	0.98	Histidine triad nucleotide-binding protein 1
CMAS	0.519	0.0028201	0.95	N-acylneuraminate cytidylyltransferase
LARP7	0.518	0.00420516	0.958	La-related protein 7
HYPK	0.516	2.14585e-05	0.639	Huntingtin-interacting protein K
LRPAP1	0.515	0.0093232	0.969	Alpha-2-macroglobulin receptor-associated protein
RTN3	0.515	0.0187219	0.977	Reticulon-3
TMTC3	0.515	0.00174241	0.939	Transmembrane and TPR repeat-containing protein 3
KHSRP	0.512	0.0398819	0.983	Far upstream element-binding protein 2
TWF1	0.512	0.00786689	0.967	Twinfilin-1
PDP1	0.51	0.000117369	0.812	[Pyruvate dehydrogenase [acetyl-transferring]]-phosphatase 1, mitochondrial
MRPS36	0.508	0.0260691	0.98	28S ribosomal protein S36, mitochondrial
RNPS1	0.507	0.0333582	0.982	RNA-binding protein with serine-rich domain 1
MRPS35	0.506	0.00462025	0.959	28S ribosomal protein S35, mitochondrial
POFUT1	0.505	0.011636	0.972	GDP-fucose protein O-fucosyltransferase 1
ALDH2	0.504	0.019093	0.977	Aldehyde dehydrogenase, mitochondrial
AAMDC	0.503	0.0403878	0.983	Mth938 domain-containing protein
CCDC12	0.503	0.0236017	0.979	Coiled-coil domain-containing protein 12
C11orf52	0.502	0.0206965	0.978	Uncharacterized protein C11orf52
CLUAP1	0.501	0.0215103	0.978	Clusterin-associated protein 1
SCRN1	0.501	0.0492853	0.984	Secernin-1
ATP2B4	0.499	0.00577334	0.963	Plasma membrane calcium-transporting ATPase 4
CCDC173	0.499	0.00856205	0.968	Coiled-coil domain-containing protein 173
PHPT1	0.497	0.0286304	0.98	14 kDa phosphohistidine phosphatase
PPP1R13L	0.495	0.0155138	0.975	RelA-associated inhibitor
TUBB	0.495	0.0105752	0.971	Tubulin beta chain
LY75	0.493	0.00697216	0.966	Lymphocyte antigen 75
RBBP7	0.493	0.0292774	0.981	Histone-binding protein RBBP7
AK2	0.492	0.00548839	0.962	Adenylate kinase 2, mitochondrial;Adenylate kinase 2, mitochondrial, N-terminally processed
PPP6C	0.492	0.0270049	0.98	Serine/threonine-protein phosphatase 6 catalytic subunit;Serine/threonine-protein phosphatase 6 catalytic subunit, N-terminally processed
RHOG	0.49	0.00371854	0.955	Rho-related GTP-binding protein RhoG
FYCO1	0.485	0.000213214	0.853	FYVE and coiled-coil domain-containing protein 1
PKM	0.485	0.00285013	0.95	Pyruvate kinase PKM
ENKUR	0.484	0.00017343	0.84	Enkurin
GNPNAT1	0.484	0.0298613	0.981	Glucosamine 6-phosphate N-acetyltransferase
GPS1	0.484	0.0402945	0.983	COP9 signalosome complex subunit 1
PPM1A	0.483	0.00199709	0.942	Protein phosphatase 1A
SSH3	0.481	0.018225	0.977	Protein phosphatase Slingshot homolog 3
UTRN	0.479	0.00467325	0.959	Utrophin
ACYP1	0.478	0.000852727	0.918	Acylphosphatase-1
MTDH	0.478	0.0206772	0.978	Protein LYRIC
FAM92B	0.47	0.0142695	0.974	Protein FAM92B
LRRC48	0.465	0.0485598	0.984	Leucine-rich repeat-containing protein 48
DLGAP4	0.462	0.0292723	0.981	Disks large-associated protein 4
RBM10	0.46	2.18131e-05	0.641	RNA-binding protein 10
NDUFA6	0.458	0.00333512	0.953	NADH dehydrogenase [ubiquinone] 1 alpha subcomplex subunit 6
NDUFC2	0.456	0.00634395	0.964	NADH dehydrogenase [ubiquinone] 1 subunit C2
NIF3L1	0.456	0.011727	0.972	NIF3-like protein 1
DLST	0.454	0.0156644	0.975	Dihydrolipoyllysine-residue succinyltransferase component of 2-oxoglutarate dehydrogenase complex, mitochondrial
ATXN10	0.453	0.00479675	0.96	Ataxin-10
PALLD	0.453	0.0165338	0.976	Palladin
ZNF717	0.453	0.0208614	0.978	Zinc finger protein 717
DGKA	0.452	0.00301342	0.951	Diacylglycerol kinase alpha
TRMT10C	0.452	0.000154177	0.832	Mitochondrial ribonuclease P protein 1
CECR5	0.451	0.0200486	0.977	Cat eye syndrome critical region protein 5
CDC42EP4	0.45	0.0417667	0.983	Cdc42 effector protein 4
STEAP3	0.45	0.0010117	0.923	Metalloreductase STEAP3
ANXA3	0.448	0.0281531	0.98	Annexin A3
ARHGDIA	0.447	0.0222746	0.978	Rho GDP-dissociation inhibitor 1
MAPK14	0.447	0.0168576	0.976	Mitogen-activated protein kinase 14
GSTT1	0.445	0.0372859	0.982	Glutathione S-transferase theta-1
AP1M1	0.444	0.041688	0.983	AP-1 complex subunit mu-1
STX12	0.443	0.00156947	0.936	Syntaxin-12
MNS1	0.442	0.00195808	0.942	Meiosis-specific nuclear structural protein 1
SON	0.441	0.00243055	0.947	Protein SON
PBDC1	0.439	0.0285333	0.98	Protein PBDC1
EPB41L1	0.437	0.029969	0.981	Band 4.1-like protein 1
SEH1L	0.433	0.0159021	0.975	Nucleoporin SEH1
HLA-B	0.432	0.0443582	0.984	HLA class I histocompatibility antigen, B-7 alpha chain
TCIRG1	0.431	0.00368106	0.955	V-type proton ATPase 116 kDa subunit a isoform 3
CWF19L1	0.428	0.00299223	0.951	CWF19-like protein 1
MAPRE1	0.426	0.0317958	0.981	Microtubule-associated protein RP/EB family member 1
THOP1	0.426	0.0186968	0.977	Thimet oligopeptidase
MYO1C	0.425	0.0473832	0.984	Unconventional myosin-Ic
GK3P	0.422	0.0218674	0.978	Putative glycerol kinase 3;Glycerol kinase
CFAP57	0.421	0.00605449	0.963	Cilia- and flagella-associated protein 57
SAFB2	0.42	0.00416592	0.957	Scaffold attachment factor B2
PTK7	0.415	0.00623882	0.964	Inactive tyrosine-protein kinase 7
THUMPD1	0.415	0.0271642	0.98	THUMP domain-containing protein 1
BRIX1	0.412	0.00427823	0.958	Ribosome biogenesis protein BRX1 homolog
EPS15L1	0.411	0.00911245	0.969	Epidermal growth factor receptor substrate 15-like 1
PLIN3	0.411	0.00248244	0.947	Perilipin-3
KDSR	0.406	0.0172522	0.976	3-ketodihydrosphingosine reductase
PDCD5	0.405	0.0191632	0.977	Programmed cell death protein 5
NUP98	0.403	0.0265237	0.98	Nuclear pore complex protein Nup98-Nup96;Nuclear pore complex protein Nup98;Nuclear pore complex protein Nup96
PTPRF	0.403	0.0195806	0.977	Receptor-type tyrosine-protein phosphatase F
LIMD1	0.402	0.000307186	0.874	LIM domain-containing protein 1
LRRC23	0.402	0.0161356	0.975	Leucine-rich repeat-containing protein 23
MACROD1	0.399	0.0499494	0.984	O-acetyl-ADP-ribose deacetylase MACROD1
SH3GL1	0.398	0.00922738	0.969	Endophilin-A2
AUH	0.396	0.023188	0.979	Methylglutaconyl-CoA hydratase, mitochondrial
NUBP1	0.396	0.0358144	0.982	Cytosolic Fe-S cluster assembly factor NUBP1
LEMD3	0.395	0.0184067	0.977	Inner nuclear membrane protein Man1
SNX18	0.395	0.0241878	0.979	Sorting nexin-18
NUP160	0.394	0.0177618	0.976	Nuclear pore complex protein Nup160
ACOX3	0.393	0.0152984	0.975	Peroxisomal acyl-coenzyme A oxidase 3
NDUFS6	0.393	0.0366931	0.982	NADH dehydrogenase [ubiquinone] iron-sulfur protein 6, mitochondrial
RABL6	0.392	0.0407483	0.983	Rab-like protein 6
ACBD3	0.387	0.0405048	0.983	Golgi resident protein GCP60
RPL26L1	0.387	0.00677441	0.965	60S ribosomal protein L26-like 1
DCXR	0.386	0.0156106	0.975	L-xylulose reductase
DLG3	0.386	0.0127873	0.973	Disks large homolog 3
GORASP2	0.386	0.0253592	0.98	Golgi reassembly-stacking protein 2
YWHAG	0.386	0.0373678	0.982	14-3-3 protein gamma;14-3-3 protein gamma, N-terminally processed
AIMP1	0.384	0.0438129	0.984	Aminoacyl tRNA synthase complex-interacting multifunctional protein 1;Endothelial monocyte-activating polypeptide 2
GSS	0.384	0.0262334	0.98	Glutathione synthetase
WDR35	0.382	0.0397126	0.983	WD repeat-containing protein 35
MTX1	0.381	0.032407	0.981	Metaxin-1
TAPBP	0.381	0.0140312	0.974	Tapasin
PCCB	0.38	0.00367541	0.955	Propionyl-CoA carboxylase beta chain, mitochondrial
SMARCA5	0.379	0.0243198	0.979	SWI/SNF-related matrix-associated actin-dependent regulator of chromatin subfamily A member 5
TMC4	0.378	0.0204095	0.978	Transmembrane channel-like protein 4
STAMBP	0.377	0.00670931	0.965	STAM-binding protein
CORO2A	0.374	0.0405056	0.983	Coronin-2A
TBC1D5	0.37	0.0254307	0.98	TBC1 domain family member 5
ATP1A1	0.369	0.0296718	0.981	Sodium/potassium-transporting ATPase subunit alpha-1
CASP3	0.369	0.0308447	0.981	Caspase-3;Caspase-3 subunit p17;Caspase-3 subunit p12
ATG16L1	0.366	0.00728454	0.966	Autophagy-related protein 16-1
AIP	0.364	0.0193589	0.977	AH receptor-interacting protein
EPCAM	0.361	0.0451371	0.984	Epithelial cell adhesion molecule
COG7	0.359	0.0161546	0.975	Conserved oligomeric Golgi complex subunit 7
AFG3L2	0.358	0.0285026	0.98	AFG3-like protein 2
SCO1	0.357	0.0056219	0.962	Protein SCO1 homolog, mitochondrial
TES	0.357	0.0107181	0.971	Testin
SCAMP3	0.355	0.0424677	0.983	Secretory carrier-associated membrane protein 3
CYB5A	0.353	0.0460485	0.984	Cytochrome b5
ECI2	0.353	0.0118088	0.972	Enoyl-CoA delta isomerase 2, mitochondrial
RPA1	0.353	0.0344717	0.982	Replication protein A 70 kDa DNA-binding subunit;Replication protein A 70 kDa DNA-binding subunit, N-terminally processed
GUK1	0.351	0.00715959	0.966	Guanylate kinase
MAP7	0.351	0.0222614	0.978	Ensconsin
VPS26A	0.35	0.0159266	0.975	Vacuolar protein sorting-associated protein 26A
DNAJB11	0.349	0.0250188	0.979	DnaJ homolog subfamily B member 11
MOB1B	0.347	0.0397098	0.983	MOB kinase activator 1B;MOB kinase activator 1A
IFT140	0.346	0.0347074	0.982	Intraflagellar transport protein 140 homolog
RNASET2	0.346	0.0429022	0.983	Ribonuclease T2
MTPN	0.343	0.0214124	0.978	Myotrophin
VPS4A	0.343	0.0373879	0.982	Vacuolar protein sorting-associated protein 4A
HBS1L	0.342	0.00999071	0.97	HBS1-like protein
ANXA2	0.34	0.0459479	0.984	Annexin A2;Putative annexin A2-like protein
GIPC1	0.34	0.0311919	0.981	PDZ domain-containing protein GIPC1
SLC26A2	0.336	0.0239924	0.979	Sulfate transporter
CLUH	0.333	0.04953	0.984	Clustered mitochondria protein homolog
UFD1L	0.332	0.0246142	0.979	Ubiquitin fusion degradation protein 1 homolog
NAP1L4	0.329	0.00665288	0.965	Nucleosome assembly protein 1-like 4
COA3	0.327	0.0100297	0.97	Cytochrome c oxidase assembly factor 3 homolog, mitochondrial
FAM107B	0.325	0.029914	0.981	Protein FAM107B
PDLIM1	0.324	0.00712642	0.966	PDZ and LIM domain protein 1
HSP90B1	0.323	0.0130611	0.973	Endoplasmin
MRI1	0.323	0.0361359	0.982	Methylthioribose-1-phosphate isomerase
MCCC1	0.322	0.0365778	0.982	Methylcrotonoyl-CoA carboxylase subunit alpha, mitochondrial
CTTN	0.321	0.0295427	0.981	Src substrate cortactin
LANCL2	0.32	0.0126692	0.973	LanC-like protein 2
DDX39A	0.315	0.0433839	0.983	ATP-dependent RNA helicase DDX39A
HSD17B10	0.313	0.0487386	0.984	3-hydroxyacyl-CoA dehydrogenase type-2
VWA8	0.312	0.0333134	0.982	von Willebrand factor A domain-containing protein 8
BCAR1	0.311	0.0399302	0.983	Breast cancer anti-estrogen resistance protein 1
SEPT10	0.308	0.0466897	0.984	Septin-10
RDH10	0.306	0.0279188	0.98	Retinol dehydrogenase 10
GNPDA1	0.305	0.0357061	0.982	Glucosamine-6-phosphate isomerase 1
MYH9	0.304	0.0151548	0.975	Myosin-9
ROCK1	0.303	0.0100036	0.97	Rho-associated protein kinase 1
CBX3	0.297	0.0482277	0.984	Chromobox protein homolog 3
USO1	0.292	0.0413849	0.983	General vesicular transport factor p115
CPSF7	0.291	0.0439254	0.984	Cleavage and polyadenylation specificity factor subunit 7
ILK	0.287	0.0387433	0.983	Integrin-linked protein kinase
AP3B1	0.279	0.0476041	0.984	AP-3 complex subunit beta-1
P4HTM	0.277	0.00564108	0.962	Transmembrane prolyl 4-hydroxylase
STX4	0.276	0.0178393	0.976	Syntaxin-4
TOR1AIP2	0.275	0.0265774	0.98	Torsin-1A-interacting protein 2
CDC42BPB	0.27	0.0435168	0.983	Serine/threonine-protein kinase MRCK beta
PDS5A	0.267	0.0180631	0.977	Sister chromatid cohesion protein PDS5 homolog A
MPI	0.265	0.0370018	0.982	Mannose-6-phosphate isomerase
PPP6R3	0.264	0.0367453	0.982	Serine/threonine-protein phosphatase 6 regulatory subunit 3
RUFY1	-0.278	0.0483683	0.984	RUN and FYVE domain-containing protein 1
MAPK3	-0.283	0.0180359	0.977	Mitogen-activated protein kinase 3
LMAN2	-0.287	0.0446921	0.984	Vesicular integral-membrane protein VIP36
SH3PXD2B	-0.292	0.0105593	0.971	SH3 and PX domain-containing protein 2B
KIF3B	-0.309	0.0343687	0.982	Kinesin-like protein KIF3B;Kinesin-like protein KIF3B, N-terminally processed
NAPG	-0.319	0.0251255	0.979	Gamma-soluble NSF attachment protein
PSMD11	-0.319	0.0421933	0.983	26S proteasome non-ATPase regulatory subunit 11
FAM129B	-0.326	0.0381849	0.983	Niban-like protein 1
KARS	-0.332	0.0320261	0.981	Lysine--tRNA ligase
NEK9	-0.336	0.00787515	0.967	Serine/threonine-protein kinase Nek9
ANXA1	-0.345	0.0178036	0.976	Annexin A1
DYNC1LI1	-0.348	0.0204517	0.978	Cytoplasmic dynein 1 light intermediate chain 1
ANXA11	-0.35	0.0144756	0.974	Annexin A11
CLU	-0.35	0.0260034	0.98	Clusterin;Clusterin beta chain;Clusterin alpha chain
NUP93	-0.357	0.0246096	0.979	Nuclear pore complex protein Nup93
IRF6	-0.362	0.013676	0.974	Interferon regulatory factor 6
PRPF8	-0.362	0.0497324	0.984	Pre-mRNA-processing-splicing factor 8
STX18	-0.364	0.0183003	0.977	Syntaxin-18
TACO1	-0.365	0.00608148	0.964	Translational activator of cytochrome c oxidase 1
MGLL	-0.371	0.0355538	0.982	Monoglyceride lipase
EFHD2	-0.383	0.0380472	0.983	EF-hand domain-containing protein D2
CC2D1A	-0.386	0.0119373	0.972	Coiled-coil and C2 domain-containing protein 1A
G3BP1	-0.399	0.0417545	0.983	Ras GTPase-activating protein-binding protein 1
NAA40	-0.4	0.0158096	0.975	N-alpha-acetyltransferase 40
CAPRIN1	-0.403	0.0375588	0.982	Caprin-1
DHRS1	-0.407	0.00750635	0.967	Dehydrogenase/reductase SDR family member 1
IDH3A	-0.411	0.0482334	0.984	Isocitrate dehydrogenase [NAD] subunit alpha, mitochondrial
GMPPB	-0.42	0.0307688	0.981	Mannose-1-phosphate guanyltransferase beta
AP2M1	-0.424	0.0265707	0.98	AP-2 complex subunit mu
MATR3	-0.424	0.0173195	0.976	Matrin-3
HNRNPH1	-0.426	0.0165352	0.976	Heterogeneous nuclear ribonucleoprotein H;Heterogeneous nuclear ribonucleoprotein H, N-terminally processed
IPO7	-0.429	0.0226911	0.979	Importin-7
SEPT11	-0.429	0.0123333	0.973	Septin-11
CAMK2D	-0.433	0.00825047	0.968	Calcium/calmodulin-dependent protein kinase type II subunit delta
GART	-0.433	0.0123255	0.973	Trifunctional purine biosynthetic protein adenosine-3;Phosphoribosylamine--glycine ligase;Phosphoribosylformylglycinamidine cyclo-ligase;Phosphoribosylglycinamide formyltransferase
XRCC5	-0.434	0.0259222	0.98	X-ray repair cross-complementing protein 5
MYO1D	-0.438	0.0132636	0.973	Unconventional myosin-Id
DSTN	-0.443	0.0307076	0.981	Destrin
KPNB1	-0.443	0.0309001	0.981	Importin subunit beta-1
PSMF1	-0.451	0.0344141	0.982	Proteasome inhibitor PI31 subunit
DYNC1LI2	-0.452	0.0198384	0.977	Cytoplasmic dynein 1 light intermediate chain 2
EIF4A1	-0.452	0.0131659	0.973	Eukaryotic initiation factor 4A-I
PSMD5	-0.458	0.0268383	0.98	26S proteasome non-ATPase regulatory subunit 5
ACSS1	-0.465	0.0447148	0.984	Acetyl-coenzyme A synthetase 2-like, mitochondrial
TRAP1	-0.465	0.0110792	0.971	Heat shock protein 75 kDa, mitochondrial
TUFM	-0.467	0.0303829	0.981	Elongation factor Tu, mitochondrial
SNRNP70	-0.471	0.0409403	0.983	U1 small nuclear ribonucleoprotein 70 kDa
HSPA4	-0.472	0.00367752	0.955	Heat shock 70 kDa protein 4
KPNA3	-0.472	0.0385772	0.983	Importin subunit alpha-4
LRPPRC	-0.481	0.0192802	0.977	Leucine-rich PPR motif-containing protein, mitochondrial
CCT2	-0.482	0.0110265	0.971	T-complex protein 1 subunit beta
USMG5	-0.489	0.0114468	0.972	Up-regulated during skeletal muscle growth protein 5
ACADSB	-0.491	0.0380792	0.983	Short/branched chain specific acyl-CoA dehydrogenase, mitochondrial
BCAP29	-0.491	0.000405469	0.888	B-cell receptor-associated protein 29
RAVER1	-0.491	0.0078802	0.967	Ribonucleoprotein PTB-binding 1
ABCC1	-0.492	0.00631311	0.964	Multidrug resistance-associated protein 1
EZR	-0.492	0.00419957	0.958	Ezrin
IFI16	-0.495	0.00401859	0.957	Gamma-interferon-inducible protein 16
HDHD2	-0.496	0.0128088	0.973	Haloacid dehalogenase-like hydrolase domain-containing protein 2
DDX6	-0.497	0.0176682	0.976	Probable ATP-dependent RNA helicase DDX6
AK3	-0.498	0.0141047	0.974	GTP:AMP phosphotransferase AK3, mitochondrial
CYP2S1	-0.5	0.011198	0.972	Cytochrome P450 2S1
HNRNPK	-0.508	0.00400632	0.957	Heterogeneous nuclear ribonucleoprotein K
PRPS2	-0.512	0.0241865	0.979	Ribose-phosphate pyrophosphokinase 2
ATIC	-0.515	0.0252481	0.979	Bifunctional purine biosynthesis protein PURH;Phosphoribosylaminoimidazolecarboxamide formyltransferase;IMP cyclohydrolase
EML2	-0.516	0.0012375	0.93	Echinoderm microtubule-associated protein-like 2
GCLC	-0.516	0.029647	0.981	Glutamate--cysteine ligase catalytic subunit
NAPA	-0.517	0.0121217	0.972	Alpha-soluble NSF attachment protein
RBM47	-0.518	0.0137692	0.974	RNA-binding protein 47
NAT1	-0.52	0.0362987	0.982	Arylamine N-acetyltransferase 1
HSPH1	-0.522	0.0136906	0.974	Heat shock protein 105 kDa
PARK7	-0.523	0.0460626	0.984	Protein deglycase DJ-1
ARPC1A	-0.526	0.0147564	0.975	Actin-related protein 2/3 complex subunit 1A
CLIC1	-0.526	0.0442033	0.984	Chloride intracellular channel protein 1
NMT1	-0.526	0.0274924	0.98	Glycylpeptide N-tetradecanoyltransferase 1
EIF5	-0.529	0.00497893	0.96	Eukaryotic translation initiation factor 5
HSP90AA1	-0.529	0.0105963	0.971	Heat shock protein HSP 90-alpha
GAPVD1	-0.53	0.0174173	0.976	GTPase-activating protein and VPS9 domain-containing protein 1
HSPBP1	-0.532	0.0056168	0.962	Hsp70-binding protein 1
MLF1	-0.534	0.0150476	0.975	Myeloid leukemia factor 1
MT-CO1	-0.542	0.0326265	0.981	Cytochrome c oxidase subunit 1
SPATA6	-0.542	0.0265804	0.98	Spermatogenesis-associated protein 6
HACD3	-0.548	0.0442292	0.984	Very-long-chain (3R)-3-hydroxyacyl-CoA dehydratase 3
PSMC5	-0.548	0.000327875	0.877	26S protease regulatory subunit 8
TRIM29	-0.549	0.0321935	0.981	Tripartite motif-containing protein 29
COPS4	-0.555	0.000630954	0.907	COP9 signalosome complex subunit 4
SCFD1	-0.558	0.00182516	0.94	Sec1 family domain-containing protein 1
HSPA1B	-0.563	0.0154835	0.975	Heat shock 70 kDa protein 1B;Heat shock 70 kDa protein 1A
PRDX1	-0.568	0.0106385	0.971	Peroxiredoxin-1
PTBP3	-0.571	0.0313419	0.981	Polypyrimidine tract-binding protein 3
GLRX	-0.576	0.0227293	0.979	Glutaredoxin-1
HNRNPH2	-0.581	0.0318428	0.981	Heterogeneous nuclear ribonucleoprotein H2
AKR1C3	-0.585	0.0100397	0.97	Aldo-keto reductase family 1 member C3
CLTC	-0.588	0.0276076	0.98	Clathrin heavy chain 1
HSPB11	-0.588	0.00229351	0.946	Intraflagellar transport protein 25 homolog
ARL8B	-0.592	0.0157581	0.975	ADP-ribosylation factor-like protein 8B
COX5A	-0.595	0.0397948	0.983	Cytochrome c oxidase subunit 5A, mitochondrial
SEPT2	-0.596	0.0100334	0.97	Septin-2
DDX3X	-0.597	0.020928	0.978	ATP-dependent RNA helicase DDX3X
CNN2	-0.598	0.00593326	0.963	Calponin-2
GFM2	-0.599	0.0312639	0.981	Ribosome-releasing factor 2, mitochondrial
ILVBL	-0.6	0.0272154	0.98	Acetolactate synthase-like protein
SCP2	-0.6	0.0106646	0.971	Non-specific lipid-transfer protein
ATP1B3	-0.602	0.00064982	0.908	Sodium/potassium-transporting ATPase subunit beta-3
GMPR2	-0.602	0.0144355	0.974	GMP reductase 2
AQP5	-0.603	0.00927772	0.969	Aquaporin-5
WARS	-0.604	0.0370014	0.982	Tryptophan--tRNA ligase, cytoplasmic;T1-TrpRS;T2-TrpRS
SFPQ	-0.606	0.0141879	0.974	Splicing factor, proline- and glutamine-rich
PIGR	-0.608	0.0105835	0.971	Polymeric immunoglobulin receptor;Secretory component
MCTS1	-0.611	0.00744212	0.966	Malignant T-cell-amplified sequence 1
C11orf54	-0.613	0.00889751	0.969	Ester hydrolase C11orf54
CRYM	-0.616	0.0431841	0.983	Ketimine reductase mu-crystallin
MAPRE3	-0.619	0.00405097	0.957	Microtubule-associated protein RP/EB family member 3
XPO1	-0.631	0.0124566	0.973	Exportin-1
ILF2	-0.632	0.0125471	0.973	Interleukin enhancer-binding factor 2
GSTO1	-0.633	0.014018	0.974	Glutathione S-transferase omega-1
POR	-0.637	0.0291303	0.981	NADPH--cytochrome P450 reductase
EEF1G	-0.645	0.0174644	0.976	Elongation factor 1-gamma
AKR1C2	-0.647	0.0468402	0.984	Aldo-keto reductase family 1 member C2
ATP5O	-0.664	0.0315265	0.981	ATP synthase subunit O, mitochondrial
HSPA2	-0.667	0.0415397	0.983	Heat shock-related 70 kDa protein 2
UFL1	-0.667	0.00505305	0.961	E3 UFM1-protein ligase 1
ANXA4	-0.668	0.00418315	0.958	Annexin A4
UBA6	-0.669	0.0287938	0.981	Ubiquitin-like modifier-activating enzyme 6
HSP90AB2P	-0.671	0.0292439	0.981	Putative heat shock protein HSP 90-beta 2
DNM1L	-0.679	0.046074	0.984	Dynamin-1-like protein
AASS	-0.682	0.0149444	0.975	Alpha-aminoadipic semialdehyde synthase, mitochondrial;Lysine ketoglutarate reductase;Saccharopine dehydrogenase
RPL3	-0.684	0.0312437	0.981	60S ribosomal protein L3
RARS	-0.686	0.0196662	0.977	Arginine--tRNA ligase, cytoplasmic
CHORDC1	-0.687	0.00455167	0.959	Cysteine and histidine-rich domain-containing protein 1
PEBP1	-0.687	0.00674937	0.965	Phosphatidylethanolamine-binding protein 1;Hippocampal cholinergic neurostimulating peptide
SEC23B	-0.687	0.0377191	0.983	Protein transport protein Sec23B
DYNC1H1	-0.695	0.0102686	0.971	Cytoplasmic dynein 1 heavy chain 1
RDX	-0.695	0.0454904	0.984	Radixin
CAPN2	-0.697	0.0262344	0.98	Calpain-2 catalytic subunit
FAM98B	-0.699	0.0141605	0.974	Protein FAM98B
LARS	-0.699	0.035707	0.982	Leucine--tRNA ligase, cytoplasmic
MRPL50	-0.699	0.0276173	0.98	39S ribosomal protein L50, mitochondrial
PHB2	-0.707	0.00609194	0.964	Prohibitin-2
FIS1	-0.715	0.00591688	0.963	Mitochondrial fission 1 protein
RABL2B	-0.716	0.000648149	0.908	Rab-like protein 2B;Rab-like protein 2A
MOGS	-0.717	0.0121227	0.972	Mannosyl-oligosaccharide glucosidase
CBR1	-0.72	0.000968385	0.922	Carbonyl reductase [NADPH] 1
BAG1	-0.721	0.0281111	0.98	BAG family molecular chaperone regulator 1
ARL3	-0.725	0.00699113	0.966	ADP-ribosylation factor-like protein 3
BLVRA	-0.727	0.00148549	0.935	Biliverdin reductase A
SAR1B	-0.729	0.0415737	0.983	GTP-binding protein SAR1b
COX6B1	-0.732	0.0114961	0.972	Cytochrome c oxidase subunit 6B1
IFT172	-0.74	0.0233993	0.979	Intraflagellar transport protein 172 homolog
RPL18	-0.753	0.0173688	0.976	60S ribosomal protein L18
AK7	-0.756	0.00241073	0.947	Adenylate kinase 7
HMGB1	-0.756	0.00914294	0.969	High mobility group protein B1;Putative high mobility group protein B1-like 1
GDI1	-0.766	0.0115986	0.972	Rab GDP dissociation inhibitor alpha
MAP1A	-0.769	0.0354257	0.982	Microtubule-associated protein 1A;MAP1A heavy chain;MAP1 light chain LC2
CYCS	-0.77	0.0157331	0.975	Cytochrome c
RSPH4A	-0.77	0.0294785	0.981	Radial spoke head protein 4 homolog A
MARS	-0.789	0.007946	0.967	Methionine--tRNA ligase, cytoplasmic
FBP1	-0.791	0.0324506	0.981	Fructose-1,6-bisphosphatase 1
KIF21A	-0.794	0.0162964	0.976	Kinesin-like protein KIF21A
HAGH	-0.796	0.00952079	0.97	Hydroxyacylglutathione hydrolase, mitochondrial
CD59	-0.799	0.0125306	0.973	CD59 glycoprotein
DDX5	-0.801	0.0208049	0.978	Probable ATP-dependent RNA helicase DDX5
GSK3B	-0.801	0.00476373	0.96	Glycogen synthase kinase-3 beta
PIR	-0.802	0.000304473	0.873	Pirin
TTLL12	-0.803	0.0330671	0.982	Tubulin--tyrosine ligase-like protein 12
UBE2L3	-0.806	0.00936523	0.969	Ubiquitin-conjugating enzyme E2 L3
ARHGAP18	-0.807	0.0300489	0.981	Rho GTPase-activating protein 18
AHSA1	-0.811	0.018757	0.977	Activator of 90 kDa heat shock protein ATPase homolog 1
PRPF31	-0.811	0.0132166	0.973	U4/U6 small nuclear ribonucleoprotein Prp31
LLGL2	-0.812	0.00420926	0.958	Lethal(2) giant larvae protein homolog 2
SLC25A4	-0.812	0.00862575	0.968	ADP/ATP translocase 1
PCM1	-0.813	0.00373853	0.956	Pericentriolar material 1 protein
GCN1L1	-0.818	0.0417227	0.983	Translational activator GCN1
RPL22	-0.818	0.00615231	0.964	60S ribosomal protein L22
DDX1	-0.823	0.0104788	0.971	ATP-dependent RNA helicase DDX1
FLAD1	-0.829	0.0215211	0.978	FAD synthase;Molybdenum cofactor biosynthesis protein-like region;FAD synthase region
CTBP1	-0.83	0.000743065	0.913	C-terminal-binding protein 1
SERPINB5	-0.833	0.010249	0.971	Serpin B5
HSPA4L	-0.834	0.0439865	0.984	Heat shock 70 kDa protein 4L
FH	-0.835	0.000734225	0.912	Fumarate hydratase, mitochondrial
CYP4B1	-0.837	0.000220834	0.855	Cytochrome P450 4B1
EIF4A3	-0.844	0.0128817	0.973	Eukaryotic initiation factor 4A-III;Eukaryotic initiation factor 4A-III, N-terminally processed
ACTR1B	-0.847	0.0131345	0.973	Beta-centractin
DDB1	-0.847	0.0204075	0.978	DNA damage-binding protein 1
SPTBN2	-0.853	0.00184537	0.94	Spectrin beta chain, non-erythrocytic 2
NSUN2	-0.857	0.00663291	0.965	tRNA (cytosine(34)-C(5))-methyltransferase
KYNU	-0.861	0.00378372	0.956	Kynureninase
CORO7	-0.864	4.56351e-05	0.726	Coronin-7
APPL2	-0.883	0.0139156	0.974	DCC-interacting protein 13-beta
MAOA	-0.884	0.0181767	0.977	Amine oxidase [flavin-containing] A
UPK1B	-0.896	8.20358e-05	0.782	Uroplakin-1b
ARPC2	-0.91	0.00979289	0.97	Actin-related protein 2/3 complex subunit 2
EVPL	-0.91	0.00961	0.97	Envoplakin
RPS4X	-0.912	0.019097	0.977	40S ribosomal protein S4, X isoform
SPRR1B	-0.914	0.0290008	0.981	Cornifin-B
SLC44A4	-0.922	0.0237071	0.979	Choline transporter-like protein 4
ANP32B	-0.933	0.0128522	0.973	Acidic leucine-rich nuclear phosphoprotein 32 family member B
DHX9	-0.934	0.00425269	0.958	ATP-dependent RNA helicase A
KPNA6	-0.939	0.0352236	0.982	Importin subunit alpha-7;Importin subunit alpha-6
PRKDC	-0.952	0.00179308	0.94	DNA-dependent protein kinase catalytic subunit
CAPNS1	-0.954	0.0213704	0.978	Calpain small subunit 1
STAT3	-0.954	0.000143393	0.827	Signal transducer and activator of transcription 3
ABCD3	-0.957	0.000174477	0.84	ATP-binding cassette sub-family D member 3
RSPH9	-0.961	0.00167712	0.938	Radial spoke head protein 9 homolog
CYC1	-0.964	0.00125551	0.93	Cytochrome c1, heme protein, mitochondrial
S100A16	-0.965	0.00170426	0.938	Protein S100-A16
CFAP52	-0.97	0.00216393	0.944	Cilia- and flagella-associated protein 52
QARS	-0.983	0.00250858	0.948	Glutamine--tRNA ligase
NAGK	-0.985	0.00843884	0.968	N-acetyl-D-glucosamine kinase
PRKRA	-0.99	0.0154936	0.975	Interferon-inducible double-stranded RNA-dependent protein kinase activator A
TSPO	-0.998	0.00192725	0.941	Translocator protein
ABCE1	-1.01	0.000105607	0.803	ATP-binding cassette sub-family E member 1
COPG2	-1.02	0.00495756	0.96	Coatomer subunit gamma-2
DYNLL1	-1.02	0.00131386	0.931	Dynein light chain 1, cytoplasmic
LGALS3	-1.03	0.00538712	0.962	Galectin-3
PLEKHA5	-1.03	0.000798762	0.915	Pleckstrin homology domain-containing family A member 5
RPS15	-1.03	0.000102385	0.801	40S ribosomal protein S15
SAR1A	-1.03	0.0275596	0.98	GTP-binding protein SAR1a
AKR1B1	-1.04	4.91891e-07	0.151	Aldose reductase
MB	-1.04	0.0486718	0.984	Myoglobin
ANXA8L2	-1.05	0.00328086	0.953	Annexin A8-like protein 2
PYCARD	-1.05	0.000261855	0.865	Apoptosis-associated speck-like protein containing a CARD
C14orf166	-1.06	0.00243049	0.947	UPF0568 protein C14orf166
PPP1CA	-1.06	0.0238078	0.979	Serine/threonine-protein phosphatase PP1-alpha catalytic subunit
ARMC4	-1.07	0.000328525	0.877	Armadillo repeat-containing protein 4
MT-CO2	-1.09	0.0414254	0.983	Cytochrome c oxidase subunit 2
OLA1	-1.09	0.00166424	0.938	Obg-like ATPase 1
ATPIF1	-1.1	0.00308	0.952	ATPase inhibitor, mitochondrial
PDE4D	-1.1	0.0114709	0.972	cAMP-specific 3,5-cyclic phosphodiesterase 4D
LYPLA1	-1.11	0.0172572	0.976	Acyl-protein thioesterase 1
RPS13	-1.11	0.029786	0.981	40S ribosomal protein S13
CSNK2A1	-1.12	0.00607505	0.964	Casein kinase II subunit alpha;Casein kinase II subunit alpha 3
EFTUD2	-1.12	0.0082442	0.968	116 kDa U5 small nuclear ribonucleoprotein component
RPN2	-1.12	0.017505	0.976	Dolichyl-diphosphooligosaccharide--protein glycosyltransferase subunit 2
HIGD2A	-1.13	0.0393703	0.983	HIG1 domain family member 2A, mitochondrial
S100P	-1.13	0.0420149	0.983	Protein S100-P
PAPSS1	-1.15	0.00136138	0.932	Bifunctional 3-phosphoadenosine 5-phosphosulfate synthase 1;Sulfate adenylyltransferase;Adenylyl-sulfate kinase
SNRPA1	-1.16	0.000361986	0.882	U2 small nuclear ribonucleoprotein A
MTCH2	-1.17	0.00246829	0.947	Mitochondrial carrier homolog 2
G6PD	-1.22	0.00412822	0.957	Glucose-6-phosphate 1-dehydrogenase
RSPH1	-1.22	0.000205712	0.851	Radial spoke head 1 homolog
UGDH	-1.22	0.000275934	0.868	UDP-glucose 6-dehydrogenase
ARF1	-1.28	0.00532455	0.962	ADP-ribosylation factor 1;ADP-ribosylation factor 3
METTL7A	-1.28	8.3275e-05	0.784	Methyltransferase-like protein 7A
C1orf87	-1.31	0.000385577	0.885	Uncharacterized protein C1orf87
PSMD1	-1.31	0.00558173	0.962	26S proteasome non-ATPase regulatory subunit 1
UPF1	-1.31	0.000377988	0.884	Regulator of nonsense transcripts 1
CES2	-1.33	0.000119943	0.813	Cocaine esterase
SET	-1.33	0.00865036	0.968	Protein SET
NUCB2	-1.35	0.00465381	0.959	Nucleobindin-2;Nesfatin-1
SYNE1	-1.36	0.00203805	0.943	Nesprin-1
DNAH9	-1.37	0.00254785	0.948	Dynein heavy chain 9, axonemal
PSME2	-1.37	0.0188855	0.977	Proteasome activator complex subunit 2
S100A14	-1.38	0.00138055	0.933	Protein S100-A14
AGR3	-1.39	0.00810087	0.968	Anterior gradient protein 3 homolog
SNRNP200	-1.41	0.00191446	0.941	U5 small nuclear ribonucleoprotein 200 kDa helicase
SAMHD1	-1.45	0.00159674	0.937	Deoxynucleoside triphosphate triphosphohydrolase SAMHD1
S100A11	-1.46	0.000893008	0.919	Protein S100-A11;Protein S100-A11, N-terminally processed
SOD1	-1.46	0.000923003	0.92	Superoxide dismutase [Cu-Zn]
PPOX	-1.48	0.00032345	0.876	Protoporphyrinogen oxidase
AKR1B10	-1.49	4.29422e-05	0.72	Aldo-keto reductase family 1 member B10
SPRR1A	-1.5	8.07881e-11	0.000303	Cornifin-A
IPO4	-1.54	0.000124567	0.816	Importin-4
ALDH3A2	-1.55	7.46231e-05	0.774	Fatty aldehyde dehydrogenase
ABHD11	-1.58	0.000132459	0.821	Alpha/beta hydrolase domain-containing protein 11
SPRR3	-1.58	0.0153911	0.975	Small proline-rich protein 3
SPAG6	-1.61	9.01861e-05	0.791	Sperm-associated antigen 6
LCN2	-1.7	0.000600155	0.905	Neutrophil gelatinase-associated lipocalin
CD9	-1.71	0.000803445	0.916	CD9 antigen
RPLP2	-1.75	0.0380155	0.983	60S acidic ribosomal protein P2
ALDH3B1	-1.78	0.000246922	0.862	Aldehyde dehydrogenase family 3 member B1
S100A6	-1.82	0.0126479	0.973	Protein S100-A6
DYNC2H1	-1.87	7.94124e-05	0.78	Cytoplasmic dynein 2 heavy chain 1
GSR	-1.87	0.0256744	0.98	Glutathione reductase, mitochondrial
GNB2L1	-1.92	0.0126864	0.973	Guanine nucleotide-binding protein subunit beta-2-like 1;Guanine nucleotide-binding protein subunit beta-2-like 1, N-terminally processed
NQO1	-2.02	0.00320949	0.953	NAD(P)H dehydrogenase [quinone] 1
HADH	-2.11	0.00372119	0.955	Hydroxyacyl-coenzyme A dehydrogenase, mitochondrial
ADH7	-2.13	9.05612e-05	0.791	Alcohol dehydrogenase class 4 mu/sigma chain
SLC27A2	-2.19	3.93362e-07	0.133	Very long-chain acyl-CoA synthetase
ALDH3A1	-2.28	0.000241676	0.86	Aldehyde dehydrogenase, dimeric NADP-preferring
EPHX1	-2.28	0.00368887	0.955	Epoxide hydrolase 1
GSTA1	-2.28	2.31845e-07	0.102	Glutathione S-transferase A1;Glutathione S-transferase A1, N-terminally processed
S100A8	-2.3	0.000747059	0.913	Protein S100-A8;Protein S100-A8, N-terminally processed
ALDH1A1	-2.31	0.00909018	0.969	Retinal dehydrogenase 1
CES1	-2.43	0.00488789	0.96	Liver carboxylesterase 1
DNAH5	-2.61	2.72053e-05	0.668	Dynein heavy chain 5, axonemal
S100A9	-2.71	0.000276501	0.868	Protein S100-A9
