# Supplementary material for: Molecular and Functional Characteristics of Airway Epithelium under Chronic Hypoxia
Source: Int J Mol Sci. 2023 Mar 30;24(7):6475. doi: 10.3390/ijms24076475 (PMC10095024; doi:10.3390/ijms24076475)
Supplement: Supplementary file 1 [file ijms-24-06475-s001.zip › Table S3_IPA pathway analysis_Conditional reprogramming cultures_Wong et al_Submission.xlsx]

## Sheet: IPA_zscore
	NonCF_Hypoxic.vs.NonCF_Normoxic	CF_Hypoxic.vs.CF_Normoxic
Glycolysis I	3.317	3.606
EIF2 Signaling	2.828	2.84
Spliceosomal Cycle	1	2.449
Immunogenic Cell Death Signaling Pathway	1.342	2.121
Gluconeogenesis I	2.121	2.111
HIF1α Signaling	1.667	2
Unfolded protein response	1.342	2
Integrin Signaling	2	1.941
Pyroptosis Signaling Pathway	1	1.89
NAD Signaling Pathway	1	1.732
NER (Nucleotide Excision Repair, Enhanced Pathway)	0.378	1.342
Sirtuin Signaling Pathway	2.5	1
UDP-N-acetyl-D-galactosamine Biosynthesis II		2.236
Glucose and Glucose-1-phosphate Degradation		2
GDP-glucose Biosynthesis		2
Actin Cytoskeleton Signaling		1.941
Agrin Interactions at Neuromuscular Junction		1.633
AMPK Signaling	0	1.508
Paxillin Signaling		1.414
Regulation of Cellular Mechanics by Calpain Protease		1.342
Thrombin Signaling		1.265
HER-2 Signaling in Breast Cancer		1.155
Apoptosis Signaling		1.134
Regulation of eIF4 and p70S6K Signaling		1.134
Actin Nucleation by ARP-WASP Complex		1.134
14-3-3-mediated Signaling		1
MSP-RON Signaling In Cancer Cells Pathway		1
Estrogen-Dependent Breast Cancer Signaling		1
Neuregulin Signaling		0.816
Regulation of Actin-based Motility by Rho		0.816
Reelin Signaling in Neurons	0	0.707
UVA-Induced MAPK Signaling		0.707
Macropinocytosis Signaling		0.447
Remodeling of Epithelial Adherens Junctions		0.447
RAC Signaling		0.378
Epithelial Adherens Junction Signaling		0.333
Signaling by Rho Family GTPases	0	0.277
Cell Cycle Control of Chromosomal Replication	1
Ferroptosis Signaling Pathway	-1.134	1
Inhibition of ARE-Mediated mRNA Degradation Pathway	-1.134	0.378
Neutrophil Extracellular Trap Signaling Pathway	0.535	-0.258
CSDE1 Signaling Pathway	0.447	-0.816
MicroRNA Biogenesis Signaling Pathway	0.302	-0.832
Insulin Secretion Signaling Pathway	0.816	-0.943
mTOR Signaling		-0.302
Insulin Receptor Signaling		-0.378
HGF Signaling		-0.378
PFKFB4 Signaling Pathway		-0.447
RHOGDI Signaling	0	-0.632
IL-3 Signaling		-0.816
IGF-1 Signaling		-0.816
Thrombopoietin Signaling		-0.816
CNTF Signaling		-0.816
FLT3 Signaling in Hematopoietic Progenitor Cells		-0.816
Pyrimidine Ribonucleotides De Novo Biosynthesis		-1
RAN Signaling		-2
Estrogen Receptor Signaling	-0.378	0
Necroptosis Signaling Pathway	-0.378	0
Role Of Chondrocytes In Rheumatoid Arthritis Signaling Pathway	-0.816	0
Wound Healing Signaling Pathway	-1	0
Ethanol Degradation II	-0.447
Serotonin Degradation	-0.447
Noradrenaline and Adrenaline Degradation	-0.447
Xenobiotic Metabolism AHR Signaling Pathway	-0.447
Retinoate Biosynthesis I	-1
Kinetochore Metaphase Signaling Pathway	-1
Methylglyoxal Degradation III	-1
ERK/MAPK Signaling	-0.447	-0.905
tRNA Charging	-1	-1
Sumoylation Pathway	-1	-1
NRF2-mediated Oxidative Stress Response	-1	-1.265
Oxidative Phosphorylation	-1.134	-1.667
Granzyme A Signaling	-1	-1.897
Coronavirus Pathogenesis Pathway	-1.897	-2.673
