# Supplementary material for: Molecular and Functional Characteristics of Airway Epithelium under Chronic Hypoxia
Source: Int J Mol Sci. 2023 Mar 30;24(7):6475. doi: 10.3390/ijms24076475 (PMC10095024; doi:10.3390/ijms24076475)
Supplement: Supplementary file 1 [file ijms-24-06475-s001.zip › Table S4_IPA pathway analysis_Air-liquid interface cultures_Wong et al_Submission.xlsx]

## Sheet: NonCF
pathway	NonCF_NH.vs.NonCF_NN	NonCF_HN.vs.NonCF_NN	NonCF_HH.vs.NonCF_NN	NonCF_HH.vs.NonCF_NH	NonCF_HH.vs.NonCF_HN
RHOGDI Signaling	-2.673		-0.707		-1.134
Granzyme A Signaling	-1.89				-2
PTEN Signaling	-1.667		1
Inhibition of ARE-Mediated mRNA Degradation Pathway	-1.414
PPAR Signaling	-1.414
CSDE1 Signaling Pathway	-1.342
Unfolded protein response	-1.342
PXR/RXR Activation	-1.134		-1.342		-1.342
Ethanol Degradation II	-1		-1.134		-1.633
Noradrenaline and Adrenaline Degradation	-1		-1.134		-1.633
Integrin Signaling	3.71		1.387		1.897
CREB Signaling in Neurons	3.162
RAC Signaling	3.162		-0.447		-1.134
Cholecystokinin/Gastrin-mediated Signaling	3				1
Pulmonary Fibrosis Idiopathic Signaling Pathway	3		1.633		1.633
Insulin Secretion Signaling Pathway	2.887
Signaling by Rho Family GTPases	2.84		0.707		0
Role of MAPK Signaling in Promoting the Pathogenesis of Influenza	2.828
PEDF Signaling	2.828
NGF Signaling	2.828
Oxidative Phosphorylation	-0.277		-2.828		-2.828
Xenobiotic Metabolism CAR Signaling Pathway	-0.447		-2.138		-1.265
Xenobiotic Metabolism PXR Signaling Pathway	-0.447		-2.111		-1.265
Xenobiotic Metabolism General Signaling Pathway	1.069		-2		-2
Pyrimidine Ribonucleotides Interconversion			-2		-2
Pyrimidine Ribonucleotides De Novo Biosynthesis			-2		-2
Xenobiotic Metabolism AHR Signaling Pathway	0.229		-1.508		-1.265
EIF2 Signaling	1.414		-1.414		0.816
Reelin Signaling in Neurons	1.667		-1.342		-2
Glycolysis I	2.236		2.449		1.633
HER-2 Signaling in Breast Cancer	1.414		1.897		1.667
Protein Kinase A Signaling	1.604		1.667		1.508
HOTAIR Regulatory Pathway	1.633		1.633		1
Gluconeogenesis I	2.236		1.633		1
IL-8 Signaling	2.714		1.633		1.89
Sirtuin Signaling Pathway	-0.853		1.508		0.905
ILK Signaling	1.069		1.342		0.447
tRNA Charging	1				-2
Serotonin Degradation	-0.302		-1.134		-1.633
Huntington's Disease Signaling	0.378				2
Glioma Invasiveness Signaling	2.646				2
Leukocyte Extravasation Signaling	1.291		1		1.134
Apoptosis Signaling	-0.302				1
CXCR4 Signaling	2.53		1		1
G-Protein Coupled Receptor Signaling	2.5		1.342		0.447
HIF1α Signaling	1.5		1.342		0.816
ERK/MAPK Signaling	2.309		1.342
ID1 Signaling Pathway	1.604		1		1
Paxillin Signaling	2.53				-1
fMLP Signaling in Neutrophils	2.333		-1
Fcγ Receptor-mediated Phagocytosis in Macrophages and Monocytes	2.333		-1
Actin Cytoskeleton Signaling	2.828		0.378		0
Synaptogenesis Signaling Pathway	2.183		-1
Death Receptor Signaling	2.121				1
Oxidative Ethanol Degradation III	-0.707		-0.816		-1.342
Fatty Acid α-oxidation	-0.707		-0.816		-1.342
Putrescine Degradation III	-0.707		-0.816		-1.342
Ethanol Degradation IV	-0.707		-0.816		-1.342
MSP-RON Signaling In Cancer Cells Pathway	1.604		0.378		0.816
Cardiac Hypertrophy Signaling	2.333				0.447
Thrombin Signaling	2.714				0
Ephrin Receptor Signaling	2.309		0.378		0
Actin Nucleation by ARP-WASP Complex	2.646		0		0
Agrin Interactions at Neuromuscular Junction	2.646
NF-κB Activation by Viruses	2.646
Role of NFAT in Cardiac Hypertrophy	2.646
Induction of Apoptosis by HIV1	1.633		-1		0
Ephrin B Signaling	1.633		1
Adrenomedullin signaling pathway	2.53		0
Endothelin-1 Signaling	2.53
Histamine Degradation	-0.333		-0.816		-1.342
Tryptophan Degradation X (Mammalian, via Tryptamine)	-0.333		-0.816		-1.342
Dopamine Degradation	-0.333		-0.816		-1.342
CCR3 Signaling in Eosinophils	2.449
PAK Signaling	2.449
Melanocyte Development and Pigmentation Signaling	2.449
Neuregulin Signaling	2.449
IGF-1 Signaling	1.414		-1
Opioid Signaling Pathway	2.309
UVC-Induced MAPK Signaling	2.236
Macropinocytosis Signaling	2.236
UVA-Induced MAPK Signaling	2.236
Synaptic Long Term Potentiation	2.236
Necroptosis Signaling Pathway	0		-1.134		-1
14-3-3-mediated Signaling	2.121
Apelin Endothelial Signaling Pathway	2.121
mTOR Signaling	2.121
FLT3 Signaling in Hematopoietic Progenitor Cells	2.121
ERK5 Signaling	2.121
G Beta Gamma Signaling	2.121
PDGF Signaling	0.707		-1.342
Neurotrophin/TRK Signaling	2
UDP-N-acetyl-D-galactosamine Biosynthesis II	2
WNT/β-catenin Signaling	1		0		1
CDP-diacylglycerol Biosynthesis I	2
Regulation of Actin-based Motility by Rho	2
Phosphatidylglycerol Biosynthesis II (Non-plastidic)	2
MicroRNA Biogenesis Signaling Pathway	0.626		-1.342
GNRH Signaling	1.897
VEGF Signaling	1.89
CDK5 Signaling	1.89
Polyamine Regulation in Colon Cancer	0.816		-1
Role of PKR in Interferon Induction and Antiviral Response	1.807
HGF Signaling	1.667		0
IL-6 Signaling	1.667
Ferroptosis Signaling Pathway	0.832		-0.816		0
Chemokine Signaling	1.633				0
CNTF Signaling	1.633
α-Adrenergic Signaling	1.633
AMPK Signaling	1.155		0.378		0
Retinoate Biosynthesis I	-0.447		-1
Synaptic Long Term Depression	1.414
Oncostatin M Signaling	1.342
TWEAK Signaling	1.342
Tumoricidal Function of Hepatic Natural Killer Cells	1.342
Regulation of Cellular Mechanics by Calpain Protease	1.342
Corticotropin Releasing Hormone Signaling	1.342
TNFR1 Signaling	1.342
IL-4 Signaling	1.265
Colorectal Cancer Metastasis Signaling	1.265
PI3K/AKT Signaling	1.265
Ceramide Signaling	1.134
Regulation of eIF4 and p70S6K Signaling	1
Aldosterone Signaling in Epithelial Cells	1
Triacylglycerol Degradation	-1
Fatty Acid β-oxidation I	-1
NER (Nucleotide Excision Repair, Enhanced Pathway)	0		-1
Small Cell Lung Cancer Signaling	1
Aryl Hydrocarbon Receptor Signaling	0.905
RHOA Signaling	0.832		0		0
Semaphorin Neuronal Repulsive Signaling Pathway	-0.378		0		0.447
Gαi Signaling	0.816
MYC Mediated Apoptosis Signaling	0.816
Ribonucleotide Reductase Signaling Pathway	0.728
Apelin Adipocyte Signaling Pathway	-0.707
Coronavirus Pathogenesis Pathway	0.577		0
cAMP-mediated signaling	0.447
LPS/IL-1 Mediated Inhibition of RXR Function	-0.447
Glutathione Redox Reactions I	-0.447
Granzyme B Signaling	-0.447
Cell Cycle: G2/M DNA Damage Checkpoint Regulation	-0.378
BAG2 Signaling Pathway	-0.378
NRF2-mediated Oxidative Stress Response	0.333
PPARα/RXRα Activation	-0.333

## Sheet: CF
pathway	CF_NH.vs.CF_NN	CF_HN.vs.CF_NN	CF_HH.vs.CF_NN	CF_HH.vs.CF_NH	CF_HH.vs.CF_HN
Serotonin Degradation	-2.53		-1.89		-2.121
Spliceosomal Cycle	-2.333		-1		-0.378
RAN Signaling	-2.236		-2		-1.633
Noradrenaline and Adrenaline Degradation	-2.121		-1.89		-1.89
Ethanol Degradation II	-2.121		-1.89		-1.633
Pyrimidine Ribonucleotides De Novo Biosynthesis	-2				-2.236
Pyrimidine Ribonucleotides Interconversion	-2				-2
Methylglyoxal Degradation III	-2		-2
HIPPO signaling	-2
tRNA Charging	-1.897		-2.236
Agrin Interactions at Neuromuscular Junction	2.714		2.121		2.121
14-3-3-mediated Signaling	2.309		2.121		2.714
ERK5 Signaling	2.121		2		2
Integrin Signaling	2.121		2.558		2.449
PI3K/AKT Signaling	1.941		1.897		1.667
Role of MAPK Signaling in Promoting the Pathogenesis of Influenza	1.897		2.121		2.333
Paxillin Signaling	1.807		2.53		2.309
CXCR4 Signaling	1.807		2.53		2.53
Pulmonary Fibrosis Idiopathic Signaling Pathway	1.698		2.324		2.324
IL-8 Signaling	1.698		2.714		2.714
LPS/IL-1 Mediated Inhibition of RXR Function	-1.342		-2		-1
Granzyme A Signaling	-0.728		-1.89		-1.667
Xenobiotic Metabolism AHR Signaling Pathway	-1.387		-1.732		-1.387
Necroptosis Signaling Pathway	-1.604		-1.667		-1
Cholecystokinin/Gastrin-mediated Signaling	1.387		2.714		2.714
Neutrophil Extracellular Trap Signaling Pathway	-0.577		0	2	0.471
Dopamine Degradation	-1.89		-1.633		-1.89
Tryptophan Degradation X (Mammalian, via Tryptamine)	-1.633		-1.633		-1.633
Putrescine Degradation III	-1.633		-1.633		-1.633
NF-κB Activation by Viruses	1.633		1.342		2.449
IL-17 Signaling	1.508		1.508		2.309
Thrombin Signaling	1.291		1.897		2.309
Death Receptor Signaling	1.265		1.633		2.121
ERBB Signaling	1.414		1.633		1.89
PXR/RXR Activation	-1.89		-1.342		-1.633
Xenobiotic Metabolism CAR Signaling Pathway	-1.698		-1.604		-1.5
PAK Signaling	1.414		1.633		1.633
MSP-RON Signaling In Cancer Cells Pathway	1.5		1.732		1.387
Oxidative Ethanol Degradation III	-1.633		-1.633		-1.342
Ethanol Degradation IV	-1.633		-1.633		-1.342
Glioma Invasiveness Signaling	0.707		1.633		2.236
CCR3 Signaling in Eosinophils	1.414		1.342		1.633
UVA-Induced MAPK Signaling	1.342		1		2
Renin-Angiotensin Signaling	1.265		1.633		1.414
ID1 Signaling Pathway	1.291		1.387		1.387
mTOR Signaling	0.707		1.342		2
Histamine Degradation	-1.342		-1.342		-1.342
Fatty Acid α-oxidation	-1.342		-1.342		-1.342
Xenobiotic Metabolism PXR Signaling Pathway	-1.225		-1.414		-1.279
Leukocyte Extravasation Signaling	0.258		1.897		1.732
Glycolysis I	0.816		1		2
LPS-stimulated MAPK Signaling	0.816		1.342		1.633
UVC-Induced MAPK Signaling	0.816		1.342		1.633
GNRH Signaling	1.291		1.414		0.905
HER-2 Signaling in Breast Cancer	1		1.291		1.265
ERK/MAPK Signaling	1.213		1.508		0.832
Retinoate Biosynthesis I	-1.134		-1.342		-1
D-myo-inositol (3,4,5,6)-tetrakisphosphate Biosynthesis	0.905		1.134		1.414
D-myo-inositol (1,4,5,6)-Tetrakisphosphate Biosynthesis	0.905		1.134		1.414
NRF2-mediated Oxidative Stress Response	-1.387		-1.155		-0.905
Adrenomedullin signaling pathway	0.832		1.633		0.905
Endocannabinoid Developing Neuron Pathway	0.632		1.134		1.414
Acute Phase Response Signaling	0.632		1		1.508
Actin Cytoskeleton Signaling	0.73		1.213		1.147
Chemokine Signaling	0.302		1.414		1.265
Estrogen Biosynthesis	-1.633		-1.342
HGF Signaling	0.707		1.134		1.134
Ephrin Receptor Signaling	0.728		1.155		1.069
IL-6 Signaling	0.707		0.816		1.414
BAG2 Signaling Pathway	1		0.905		1
α-Adrenergic Signaling	0.816		1		1
Neuregulin Signaling	0.816		1		1
Inhibition of ARE-Mediated mRNA Degradation Pathway	1.414		0.378		1
eNOS Signaling	1.265		1.134		0.378
SPINK1 General Cancer Pathway	-1.134		-0.816		-0.816
GM-CSF Signaling	-1.134		-0.816		-0.816
HIF1α Signaling	0.943		1		0.775
Endocannabinoid Cancer Inhibition Pathway	-0.277		-1.414		-1
Protein Kinase A Signaling	1.225		0.775		0.688
Ephrin B Signaling	0.378		1.134		1.134
Aldosterone Signaling in Epithelial Cells	1.633				1
VEGF Signaling	0.277		1.265		0.905
Actin Nucleation by ARP-WASP Complex	-0.302		1.134		1
Signaling by Rho Family GTPases	0.962		0.943		0.471
Tryptophan Degradation III (Eukaryotic)	-1.342		-1
Phenylalanine Degradation IV (Mammalian, via Side Chain)			-1		-1.342
Insulin Secretion Signaling Pathway	0		-1.508		-0.832
PTEN Signaling	-0.632		-1		-0.707
FLT3 Signaling in Hematopoietic Progenitor Cells	0.378		0.816		1.134
Mouse Embryonic Stem Cell Pluripotency	0.378		0.816		1.134
Semaphorin Neuronal Repulsive Signaling Pathway	-0.832		-0.816		-0.632
Epithelial Adherens Junction Signaling	0.728		0.632		0.905
Induction of Apoptosis by HIV1	0.447		0.447		1.342
Amyloid Processing	-0.447		-1.342		-0.447
Natural Killer Cell Signaling	0.632		0.302		1.265
Insulin Receptor Signaling	0.535		0.707		0.905
CDK5 Signaling	-0.302		0.816		-1
PPARα/RXRα Activation	1.387		0.333		-0.302
CD27 Signaling in Lymphocytes	-1				-1
TCA Cycle II (Eukaryotic)	1		0		1
Retinol Biosynthesis	-1		-1
PPAR Signaling	0		-0.816		-1.134
ILK Signaling	0.243		0.832		0.832
PEDF Signaling	0.707		-0.378		0.816
MicroRNA Biogenesis Signaling Pathway	0.784		0.5		-0.5
Huntington's Disease Signaling	-0.632		-0.333		-0.707
Triacylglycerol Degradation	-1.633
CLEAR Signaling Pathway	-0.218		-0.832		-0.577
Fcγ Receptor-mediated Phagocytosis in Macrophages and Monocytes	1.265		0		0.333
Dilated Cardiomyopathy Signaling Pathway	-0.832		-0.378		-0.378
Estrogen Receptor Signaling	0		-0.577		-1
Sirtuin Signaling Pathway	-0.365		-0.688		-0.447
PDGF Signaling	-0.707		-0.378		-0.378
Endometrial Cancer Signaling	0.447		1
Immunogenic Cell Death Signaling Pathway	0.577		-0.277		0.577
RHOA Signaling	0.894		0.535		0
Regulation of Actin-based Motility by Rho	0.577		0.816		0
Fatty Acid β-oxidation I	-0.378		0		-1
Synaptogenesis Signaling Pathway	0		-0.832		-0.535
Oxidative Phosphorylation	-0.447		-0.277		0.632
Role of PKR in Interferon Induction and Antiviral Response	0.258		0.258		0.832
Unfolded protein response	0.447		-0.447		0.447
Ferroptosis Signaling Pathway	0.688		0.302		0.333
ERB2-ERBB3 Signaling	0.378		0.447		0.447
Aryl Hydrocarbon Receptor Signaling	0		-0.816		-0.447
Coronavirus Pathogenesis Pathway	0.408		0.277		0.577
RHOGDI Signaling	-0.655		-0.302		-0.277
Sumoylation Pathway	0.333		-0.447		-0.378
Pyroptosis Signaling Pathway	0.333		-0.447		0.378
Apelin Adipocyte Signaling Pathway	-0.333		-0.447		0.378
fMLP Signaling in Neutrophils	0.632		0		0.378
Superpathway of Methionine Degradation	1				0
Remodeling of Epithelial Adherens Junctions	-1
4-1BB Signaling in T Lymphocytes					1
UDP-N-acetyl-D-galactosamine Biosynthesis II	1
Glutaryl-CoA Degradation	-1
Cell Cycle: G2/M DNA Damage Checkpoint Regulation	1
Synaptic Long Term Potentiation	-0.277		0.378		-0.302
Oncostatin M Signaling	0		0.447		0.447
Thrombopoietin Signaling	0		0.447		0.447
EGF Signaling	0		-0.447		0.447
CSDE1 Signaling Pathway	0.378				0.447
Coronavirus Replication Pathway	-0.378		0		-0.447
EIF2 Signaling	0		-0.302		-0.5
RAC Signaling	-0.277		0		0.378
Apoptosis Signaling	-0.277		-0.302		0
Xenobiotic Metabolism General Signaling Pathway	0.277		0		0.302
PFKFB4 Signaling Pathway	-0.447
Gluconeogenesis I	0.447
Glutathione Redox Reactions I	-0.447
CD40 Signaling					0.447
Regulation of Cellular Mechanics by Calpain Protease	0		0		0.447
IGF-1 Signaling	0		0.378		0
